# Supplementary material for: Transcriptome analysis identifies genes involved in the somatic embryogenesis of Eucalyptus
Source: BMC Genomics. 2020 Nov 18;21:803. doi: 10.1186/s12864-020-07214-5 (PMC7672952; doi:10.1186/s12864-020-07214-5)
Supplement: Supplementary file 1 — Additional file 1. Gene expression profiles of differentiated and dedifferentiated tissues of E. camaldulensis and E. grandis x urophylla. [file 12864_2020_7214_MOESM1_ESM.xlsx]

## Sheet: supple
Additional file 1. Gene expression profiles of differentiated and dedifferentiated tissues of E. camaldulensis and E. grandis x urophylla.
GeneID	A1_1	A1_2	A1_3	A2_1	A2_2	A2_3	B1_1	B1_2	B1_3	B2_1	B2_2	B2_3	Gene_accession	Description
Eucgr.L03115	0	0	0	0	0	0	0	0	0	0	0	0
Eucgr.L01323	1.5078	3.47876	2.12302	1.0372	2.66352	2.08681	0	0	0	0	0.115486	0.126757	LOC104429434	uncharacterized LOC104429434
Eucgr.G02680	5.48578	4.95564	6.1978	7.37568	10.1775	8.5383	7.05166	4.44686	3.63901	8.24562	9.47243	9.50819	LOC104454087	uncharacterized LOC104454087
Eucgr.B02215	0.528033	1.33787	0.421915	0.533648	0.382057	0.238145	3.51954	27.1041	8.89281	0	0	0	LOC104432613	stress-response A/B barrel domain-containing protein HS1
Eucgr.L01236	0	0	0	0	0	0	0	0	0	0	0	0	LOC104429343	agamous-like MADS-box protein AGL61
Eucgr.K01669	13.217	16.693	13.7698	4.19024	4.96204	3.93053	9.67426	8.55118	9.57161	3.7601	3.83729	3.55921	LOC104425393	calmodulin-interacting protein 111
Eucgr.D02184	17.8274	18.6409	20.0643	25.3414	24.7417	25.1721	11.9526	12.5941	10.9018	20.8489	20.1489	19.6667	LOC104443190	MND1-interacting protein 1
Eucgr.I00485	0	0	0	0	0	0	0	0	0	0	0	0
Eucgr.H01691	0.358093	0.445367	0.491929	0.421098	0.429474	0.043588	0.215363	0.45559	0.132267	1.30247	1.27533	1.12499
Eucgr.B03058	0	0	0	0	0	0	0	0	0	0	0	0
Eucgr.I00379	7.0771	7.99904	8.52905	27.2484	25.8068	13.9768	11.2115	10.9052	10.7574	25.1125	28.632	24.0729	LOC104418235	aspartic proteinase-like protein 1
Eucgr.F01602	2.27819	4.49774	2.99894	3.55689	2.13935	1.31638	1.85896	2.14025	1.7581	4.17239	3.89371	3.41584	LOC104448790	hypothetical protein
Eucgr.H02639	0	0	0	0	0	0	0	0	0	0	0	0
Eucgr.F01593	9.78144	9.3229	11.8558	0.181954	0.863172	0.752181	1.46134	1.55477	0.476696	0.276355	0.273235	0.251496	LOC104448781	AAA-ATPase At3g50940
Eucgr.C01536	0.099861	0.385629	0.390818	0.385102	0.539248	0.682535	0.265508	0.335493	0.03239	0.281464	0.146598	0.126879	LOC104439266	pentatricopeptide repeat-containing protein At2g13420, mitochondrial-like
Eucgr.A01041	0.356066	0.570825	0.494547	0.677427	0.548375	0.285514	0.647079	0.378826	0.423196	0.187795	0	0
Eucgr.A01962	2.8547	3.64445	2.69362	63.379	68.4039	103.96	63.1026	34.915	45.7507	48.1378	39.7941	39.1058	LOC104441697	probable galacturonosyltransferase 15
Eucgr.J00096	10.8292	9.64397	12.1458	20.6383	18.6774	6.38999	4.76734	4.37028	4.20653	33.6091	35.4567	35.6116	LOC104420965	protein SRC2 homolog
Eucgr.H03426	30.5702	28.851	28.6488	17.042	19.2297	11.7951	18.0438	18.9722	18.5565	16.203	16.1859	16.3929	LOC104414767	serine/threonine-protein kinase HT1
Eucgr.A02524	0	0	0	0	0	0	0	0	0	0	0.056569	0	LOC104446451	putative disease resistance protein RGA1
Eucgr.C00330	0	0.011335	0.123119	1.09062	1.69669	1.51523	0.963406	0.581498	0.835404	0.910535	0.70123	0.934599	LOC104438820	TMV resistance protein N
Eucgr.L01732	0	0.289735	0	0	0.043388	0	0	0	0	0	0	0
Eucgr.H04215	19.457	10.5759	22.9232	2.909	5.80983	6.15217	3.31874	8.88844	4.5956	2.69986	2.59704	4.32028
Eucgr.F02915	0	0	0	0	0	0	1.10328	1.66832	1.58195	0	0	0	LOC104449769	glutathione S-transferase F12
Eucgr.G02644	0	0	0	0	0	0	0	0	0	0	0	0	LOC104455784	NADH--cytochrome b5 reductase 1
Eucgr.G03362	4.50833	4.58529	3.17445	0.557623	1.43909	0.419836	3.28205	4.50167	3.74286	0.473654	0.590779	1.67084	LOC104454639	carotenoid 9,10(9',10')-cleavage dioxygenase 1
Eucgr.G02995	0.275231	0.532013	0	1.73354	2.64399	5.83368	0.27198	0.277153	0.267214	7.68905	7.95361	8.74471
Eucgr.E00639	4.3034	11.7868	5.24933	0.674392	1.82445	2.61036	1.33546	2.38619	2.26454	0	0.259144	0.386597	LOC104443831	zinc finger protein CO3
Eucgr.J01294	2.15704	1.69646	1.54755	0.404364	0.563027	0.22969	1.81407	1.65384	1.80408	1.82166	1.80317	1.23753	LOC104421961	pentatricopeptide repeat-containing protein At2g13600
Eucgr.H04232	0	0	0	0	0	0	0	0	0	0	0	0	LOC104415368	cytochrome P450 87A3
Eucgr.E00234	19.4967	15.8986	17.401	0.937868	0.438232	1.0372	8.07167	10.558	9.13877	0.49577	0.410463	0.500504	LOC104443511	probable transcription factor KAN2
Eucgr.G00988	16.8805	23.8443	20.1422	6.00325	6.2627	5.09087	12.5127	12.8037	14.7244	9.23192	9.89361	10.1605	LOC104452929	magnesium-dependent phosphatase 1
Eucgr.D02306	16.1171	9.83598	16.6089	6.90221	6.89678	4.83738	6.29534	6.75392	5.51498	8.87518	9.58853	9.55035	LOC104442115	AT-rich interactive domain-containing protein 1
Eucgr.D02328	19.1522	12.3836	22.3576	14.5357	13.8414	8.51743	17.885	18.9659	14.8302	16.4747	18.427	16.7564	LOC104443218	uncharacterized LOC104443218
Eucgr.C03469	0	0	0	0	0	0	0.418844	0.119968	0.49092	0	0	0	LOC104438104	TMV resistance protein N
Eucgr.A02580	5.71122	3.7001	4.71709	887.607	900.95	597.815	61.8686	24.4519	26.457	280.18	278.724	266.858	LOC104415026	E3 ubiquitin-protein ligase PUB22
Eucgr.B02160	0.439467	0.073294	0.361852	3.87981	3.14776	4.21342	0.291838	0.285666	0.703748	1.39797	1.879	1.1651	LOC104432553	ammonium transporter 1 member 1
Eucgr.D00345	126.501	110.064	123.345	20.8634	21.8264	16.5302	84.4926	90.3344	91.8283	27.4377	31.0952	30.2089	LOC104440829	uncharacterized LOC104440829
Eucgr.H00700	0	0	0.058614	0.322821	0.141194	0.292535	0.272702	0.219439	0.418074	0.612306	0.553112	0.688568	LOC104416289	MDIS1-interacting receptor like kinase 2
Eucgr.E02476	107.207	81.0664	96.8232	91.6422	98.2109	126.958	141.22	133.881	116.638	75.7106	75.3609	71.68	LOC104444879	ABC transporter C family member 2
Eucgr.E04339	0.945655	2.98329	2.13892	0.394169	1.37178	0.54581	0.702908	1.35902	1.42481	0.176496	0.39363	0.438507
Eucgr.J01971	0	0	0	0	0	0	0	0	0	0	0	0	LOC104422439	UDP-glucose iridoid glucosyltransferase
Eucgr.H02944	0	0	0	0	0	0	0	0	0	0	0.117382	0
Eucgr.K00474	0	0	0	0.631105	0	0	0	0	0	0	0	0
Eucgr.B00591	0	0	0	0	0	0	0	0	0	0	0	0
Eucgr.A01071	3.10967	3.93174	3.26857	5.60946	6.5327	6.348	4.68624	4.37424	3.88415	6.76215	6.06171	6.75397	LOC104434877	F-box protein At3g07870
Eucgr.D01606	1.08714	1.63573	1.35399	2.74155	1.5802	2.42806	0.718204	0	0.282919	0	0	0.184774	LOC104441564	putative germin-like protein 2-1
Eucgr.J02131	0.296944	0	0.051862	0.300176	0	0.751791	0.12011	0.233155	0	1.31338	1.02125	0.920756	LOC104422551	AP2-like ethylene-responsive transcription factor At1g16060
Eucgr.D02285	2.54025	2.69346	3.48387	2.50259	2.91357	1.946	3.49193	2.42967	1.95105	1.78032	2.33103	1.13166
Eucgr.C02436	12.0972	13.6462	12.3805	5.96364	5.71639	3.13144	10.8077	10.1657	11.3393	8.24995	7.79502	6.40965	LOC104437453	uncharacterized LOC104437453
Eucgr.I02095	0	0	0	0	0	0	0	0	0	0	0	0
Eucgr.J01930	0	0	0	0.069833	0	0	0	0	0	0.255444	0.134765	0.362283	LOC104422398	GDP-mannose transporter GONST2
Eucgr.J01187	5.27902	11.2918	7.85992	1.9168	3.20846	2.3246	10.1275	9.34871	11.4235	2.82871	3.90089	3.98032
Eucgr.D00188	103.303	99.8973	107.614	47.1201	48.4175	47.0841	75.3468	75.0099	70.4511	46.8973	48.1289	47.3641	LOC104440712	serine/threonine-protein phosphatase 6 regulatory subunit 3
Eucgr.K00750	742.716	1038.84	813.097	35.8591	45.9477	56.6598	529.531	753.012	675.959	5.22879	5.58318	6.88745	LOC104424721	1-aminocyclopropane-1-carboxylate oxidase 3
Eucgr.I02489	5.99392	4.30973	6.95022	16.6635	12.4926	5.06933	6.70692	5.13466	5.2039	12.1097	13.6553	12.7664	LOC104419788	BTB/POZ domain-containing protein At3g50780
Eucgr.A02444	0	0.06568	0	0	0	0	0.666149	0.56425	0.353999	0	0	0	LOC104445780	myb family transcription factor PHL13
Eucgr.B00650	1.29774	0.959187	1.57845	0.107541	0.310023	0.104314	0.365123	0.419499	0.263847	0	0	0	LOC104434377	UDP-glycosyltransferase 89B1
Eucgr.J02717	0.97357	0.19463	0.743126	0.124505	0.187117	0.177864	0.351479	0.120919	0.467213	0.145734	0.08442	0.359883
Eucgr.H04559	0.233764	0	0	0.265576	0.805343	0.179372	0	0	0	0	0	0	LOC104415626	nuclear transport factor 2
Eucgr.D00263	38.5341	51.0796	41.6322	18.4792	17.2371	14.686	35.2045	30.8868	32.5755	16.5846	14.962	13.0959	LOC104440758	calcium-binding protein 39
Eucgr.F01353	0	0	0	0.057205	0	0	0.376222	1.41488	0.790012	0.007174	0	0
Eucgr.L01109	2.94117	2.43904	2.78053	2.2074	2.46777	1.68514	4.80449	3.04008	2.84627	1.04192	1.60933	1.5766
Eucgr.G02185	2.35331	2.53823	2.83606	4.5792	3.79657	2.1946	3.38838	2.81946	2.64473	2.20882	2.50394	1.74648	LOC104453713	ATP-dependent DNA helicase homolog RECG, chloroplastic
Eucgr.B02744	26.9445	22.7608	24.0127	63.4704	90.9853	116.622	16.4792	17.2703	14.2727	26.1972	22.4981	24.1359	LOC104433089	7-deoxyloganetic acid glucosyltransferase
Eucgr.H04729	11.3429	23.5381	11.7049	8.57561	5.609	5.45195	10.4346	12.7826	10.4926	20.6916	21.407	21.5853	LOC104415747	esterase AGAP003155
Eucgr.C00409	0	0	0	0	0	0	0	0	0	0	0	0	LOC104438854	TMV resistance protein N
Eucgr.A01712	9.33333	10.6526	10.9079	5.82802	2.62312	3.05089	5.60664	4.35035	4.43428	0.991356	0.733434	1.05417	LOC104439713	septum-promoting GTP-binding protein 1
Eucgr.C04025	0	0	0	0	0	0	0	0	0	0	0	0
Eucgr.H00434	35.8227	46.8582	40.0287	20.2389	18.721	13.3983	29.7135	20.4311	24.1916	12.5938	11.8928	15.8179	LOC104456284	vesicle transport protein GOT1
Eucgr.B01868	0.399936	0	0.342308	1.33866	0.224028	0.235249	0.993842	1.12907	0.117039	0.867973	1.10866	1.0152	LOC104432235	cytochrome P450 CYP72A219
Eucgr.B02316	0.049057	0	0.060184	0.261932	0.065355	0	0.390433	0.429821	0.628641	0	0	0	LOC104432700	laccase-17
Eucgr.I00624	0	0	0	0	0.707681	0	0	0	0	0	0	0
Eucgr.L01011	21.945	20.104	22.8832	0.394397	0.275261	0	0.431913	1.11723	0.561849	0	0	0	LOC104429094	protein trichome birefringence-like 19
Eucgr.C01600	0.318971	0.41274	0.633574	0	0.136568	0.073643	0.877689	0.870566	0.653148	0.126813	0.1087	0.218035
Eucgr.B03267	17.4902	15.1512	23.3553	55.3237	54.4922	77.4081	30.3725	25.8692	29.3965	26.7758	22.9873	26.4304	LOC104433487	protein-tyrosine-phosphatase MKP1
Eucgr.F03108	5.05078	6.93455	6.29177	1.46206	0.354851	1.85997	2.42301	3.02201	2.2251	0.394672	0.306314	1.42894
Eucgr.G00372	0	0	0	0	0	0	0.205358	0.155634	0.100375	0.196886	0.578891	0.649749	LOC104454885	disease resistance protein TAO1
Eucgr.I00092	0	0	0	0	0	0	4.13917	2.91571	3.38483	0.935067	0.931704	0.812414
Eucgr.B03474	2.08423	2.0297	2.84128	4.94349	5.22656	8.2933	1.16622	1.13371	0.832621	0.758557	0.664967	0.795808	LOC104435654	protein BRASSINOSTEROID INSENSITIVE 1-like
Eucgr.G02474	13.5301	7.08992	9.92629	13.8967	12.5219	12.368	3.66456	3.78697	3.29963	3.16578	3.09141	2.47804
Eucgr.B03933	0	0.089336	0.115799	4.21113	4.26817	1.12979	0.31154	0.233633	0.598476	6.7712	7.66	7.57557	LOC104434053	shugoshin-1
Eucgr.B03815	17.0764	13.3899	15.0179	19.4889	16.4721	21.7585	12.4036	17.6745	14.3481	9.26862	10.1052	9.43063	LOC104433949	coiled-coil domain-containing protein R3HCC1L
Eucgr.I01011	0	0.242085	0	0.462773	0.545267	1.04642	0.310334	0.126747	0.175796	0.118258	0	0	LOC104418623	salicylic acid-binding protein 2
Eucgr.D02322	87.1962	84.8054	75.1301	26.0893	30.8051	38.7956	85.8561	82.4913	78.9344	29.3169	33.8496	28.4672
Eucgr.J01806	0.329968	0.136224	0.163105	0.310235	0.605169	0.95289	0	0	0	0	0	0	LOC104423803	probable LRR receptor-like serine/threonine-protein kinase At3g47570
Eucgr.E03899	0.632699	1.33957	0.497878	4.10627	2.7411	2.73695	0.457596	1.41727	0.622202	3.88205	4.23072	4.61742	LOC104445615	ras-related protein RABA5a
Eucgr.E00984	1.45407	8.888	3.4442	0.352988	1.94661	0.67587	3.29106	4.23287	3.1716	0.591839	0.274934	0.745862
Eucgr.C01033	1.61745	2.80815	2.43275	0.52653	0.882013	0.759292	3.36245	1.95974	2.59845	1.43948	1.641	2.10289	LOC104436592	tRNA(Ile)-lysidine synthase
Eucgr.H04562	2.21023	3.48749	1.67278	0.231163	0.179653	0.458061	1.12138	2.3423	1.59522	0.185637	0.25802	0.178608
Eucgr.L03173	0	0	0	0	0	0	0.515693	0.28134	0.257107	0.111593	0	0.132325
Eucgr.J02948	66.2773	79.5628	61.3315	18.1749	13.1564	10.8769	64.8249	64.4659	60.2966	29.7932	33.6747	31.5957	LOC104423085	nuclear pore complex protein NUP35
Eucgr.F04147	0.456976	0.804507	0.558958	0.707463	0.353339	1.59067	0.612268	0.311431	0.883844	0.290089	0.135767	0
Eucgr.F01413	106.931	74.9055	69.3401	0.570118	0.435056	0.357456	104.393	106.335	102.351	2.87055	3.08908	3.16519	LOC104448640	peroxisomal (S)-2-hydroxy-acid oxidase
Eucgr.K01592	0	0	0	0	0	0	0	0	0	0	0	0
Eucgr.H00186	1.7847	1.71068	2.03876	1.09873	0.495354	0.288339	2.80469	3.21222	3.19732	1.12364	1.03362	0.920832	LOC104456116	cellulose synthase-like protein G2
Eucgr.D00124	0	0	0	0	0	0	1.03488	0.420274	0.602069	2.1662	2.60913	2.58785	LOC104440679	uncharacterized LOC104440679
Eucgr.F02549	0	0	0	0	0	0	0	0	0	0.186116	0	0	LOC104451929	late embryogenesis abundant protein 2
Eucgr.J02216	0	0	0	0	0	0	0	0	0	0.191983	0	0.389182
Eucgr.K01541	5.62139	9.04804	5.76556	19.4916	20.4786	10.7818	20.1111	24.0932	23.0524	8.30878	8.32494	9.34433	LOC104425307	cyclic dof factor 3
Eucgr.L00550	0	0	0.296563	1.82065	1.56944	0.286547	0.312176	0.788331	1.80244	1.34872	1.3395	0.952829	LOC104428594	uncharacterized LOC104428594
Eucgr.K03470	67.471	55.8928	59.9562	145.938	135.944	182.287	85.221	81.0239	91.6734	50.3743	48.9502	51.3501	LOC104426755	ABC transporter C family member 4
Eucgr.A00646	0.279932	1.02529	0.265621	1.62877	1.83634	0.769378	2.49482	2.17194	1.10492	0	1.71798	0.830188	LOC104453359	protein LURP-one-related 15
Eucgr.H01861	2.18012	4.03123	2.68753	2.15979	2.2505	1.91288	13.7186	14.7092	15.591	1.82433	2.54349	1.88882	LOC104457184	BTB/POZ and TAZ domain-containing protein 3
Eucgr.I01777	0.086102	0.110617	0.12811	2.4533	1.77239	0.944522	0.22289	0.103665	0.096742	1.96992	3.20159	2.64182	LOC104419244	polygalacturonase At1g48100
Eucgr.G00208	0	0	0	0	0	0	0.13332	0	0	0	0.346638	0.18833
Eucgr.K00245	162.559	195.625	164.851	151.169	128.822	150.149	114.827	119.176	120.122	126.635	124.805	123.993	LOC104424407	membrane steroid-binding protein 2
Eucgr.E02830	0	0	0	0	0.120512	0	0	0.235203	0.201088	0.141338	0.223451	0.049414
Eucgr.F03840	10.4572	8.26104	9.33071	11.7021	15.8101	12.3801	4.4734	3.77123	4.28936	7.34938	8.77739	7.48499
Eucgr.J01667	0	0	0	0.184127	0.240943	0.486902	0	0	0	0	0.345329	0.456267
Eucgr.E01686	0	0	0	0	0	0	0	0	0	0	0	0
Eucgr.C00621	12.6003	16.2976	14.4785	17.1752	15.9175	16.3778	10.2029	7.81858	8.74739	4.55177	5.2326	4.8989	LOC104436275	uncharacterized LOC104436275
Eucgr.H02767	0.272105	0.318453	0.297043	2.8019	3.25179	2.61595	3.15941	3.71172	2.83564	6.97822	6.93176	6.33612
Eucgr.I02128	0	0	0	1.50366	0	2.50457	4.91232	3.2504	3.03701	0.326726	0.614233	0.166718
Eucgr.L00395	0	0	0	0	0	0	0	0	0	0	0	0
Eucgr.J02870	22.7638	53.9525	44.3205	37.09	35.6234	37.1429	51.6678	45.328	48.8074	16.0857	33.8158	16.4529	LOC104423029	protein FLX-like 3
Eucgr.A02378	7.41898	7.77691	9.24207	4.04791	4.27288	3.38006	10.4924	9.21313	8.8255	5.22353	4.50015	4.38453	LOC104445173	pentatricopeptide repeat-containing protein At5g14770, mitochondrial
Eucgr.E01810	0.800471	0.821867	1.25432	0.741412	2.4071	1.13194	6.27461	3.40943	3.82484	1.94301	2.05962	2.47279	LOC104444565	TMV resistance protein N
Eucgr.E03294	75.9019	64.5489	78.1692	59.6607	63.2233	57.7036	63.8194	63.0578	63.7724	60.5655	62.2613	62.1264	LOC104445277	vesicle-fusing ATPase
Eucgr.H02400	51.9859	49.9658	48.6659	42.0811	36.2813	33.6449	34.9473	53.194	40.9361	36.9466	38.2078	36.8216	LOC104414084	COMPASS-like H3K4 histone methylase component WDR5A
Eucgr.C02875	1.63886	0.901691	1.8098	0.48741	0.328594	0.223214	1.74258	1.62854	1.21507	0.821203	0.846512	0.60041	LOC104437740	pentatricopeptide repeat-containing protein At3g22690
Eucgr.C02026	5.78448	11.7056	10.1754	8.95281	10.0457	8.32934	12.9586	9.8352	10.6045	5.33012	5.39532	4.51388	LOC104437197	uncharacterized LOC104437197
Eucgr.E00035	0	0	0	0	0	0	0.247678	0.571022	0.277974	0	0	0	LOC104443346	aluminum-activated malate transporter 10
Eucgr.G02339	0	0	0	0	0	0	0	0	0	0	0	0	LOC104455710	cell number regulator 2
Eucgr.K01131	0.521373	0.312657	0.289413	0.110771	0.490926	0.616836	1.4205	1.09358	1.43427	0.322563	0.565091	0.545299	LOC104425000	G-type lectin S-receptor-like serine/threonine-protein kinase At2g19130
Eucgr.D00915	0.823911	0.104134	0.669132	0	0.124198	0.302952	2.99193	2.57953	2.46502	0.13603	0.441832	0.242011
Eucgr.G02678	1.54746	4.47487	4.864	3.11104	2.03903	2.64675	6.55096	3.97828	6.31467	3.36322	1.78753	2.77351	LOC104454085	charged multivesicular body protein 5
Eucgr.G00356	60.2241	65.4082	63.0207	18.6514	20.5007	23.8436	41.8521	42.428	41.9752	18.7536	19.1781	18.4776	LOC104452591	uncharacterized zinc finger protein At4g06634
Eucgr.H00805	12.1721	16.7716	15.7138	3.9434	3.93186	2.97568	21.3233	17.9592	16.8196	11.9005	10.491	12.5032	LOC104456550	ribonuclease P protein subunit p25-like protein
Eucgr.A02621	3.45908	3.59604	3.65964	4.02939	3.38115	2.9656	4.65539	3.02884	3.89748	2.187	2.33412	1.69684	LOC104447327	putative pentatricopeptide repeat-containing protein At5g37570
Eucgr.K01014	0	0	0	0.100767	0	0	0.138786	0.072165	0.138228	0	0	0	LOC104427253	protein ACCELERATED CELL DEATH 6
Eucgr.E01681	0	0	0	0	0	0	0	0	0	0.249601	0	0
Eucgr.B02615	0.080073	0.354545	0.177604	8.68834	11.2104	5.9227	0.58094	0.687667	0.784854	13.0666	13.8919	13.8232	LOC104432975	DNA (cytosine-5)-methyltransferase CMT3
Eucgr.A01183	6.85884	6.03636	6.37908	4.37814	4.44162	4.85391	4.3668	3.99252	4.06636	3.74283	3.49828	4.17075
Eucgr.J02845	0.562127	0.455244	0.524234	0.192216	0.585722	0.382398	0.902637	0.424436	0.459949	0.021331	0.113448	0.085642
Eucgr.F04056	0.560912	0.70473	0.52891	0.534967	0.531838	0.324347	0.265892	0	0.446194	0	0	0.147458
Eucgr.K00394	19.9502	14.1415	18.096	7.93586	10.3602	15.3629	25.7582	26.044	27.2953	3.46423	4.70609	4.69257	LOC104424520	putative aminoacrylate hydrolase RutD
Eucgr.A00094	6.46165	7.19066	6.92941	8.00998	6.72803	5.37949	18.2578	15.4379	16.2523	22.1112	22.4047	21.3157	LOC104434295	elongator complex protein 4
Eucgr.A00946	0	0	0	0	0	0	0	0	0	0	0	0	LOC104454489	putative UDP-glucose flavonoid 3-O-glucosyltransferase 3
Eucgr.K02345	44.3655	44.6556	43.8505	86.8996	77.5975	57.7082	37.4986	29.8609	30.1785	53.0103	47.787	45.9057	LOC104425898	uncharacterized LOC104425898
Eucgr.G02184	28.2604	15.2757	16.0619	25.5053	19.9376	28.1453	11.8828	12.7571	9.90809	27.9312	29.015	27.9216	LOC104453712	serine carboxypeptidase-like 50
Eucgr.H01619	0	0.357405	0.259099	0	0.057266	0	0	0	0	0	0	0	LOC104416608	alcohol-forming fatty acyl-CoA reductase
Eucgr.I02330	16.4279	13.0524	11.8943	3.07763	2.27508	1.1264	4.85518	5.06928	8.6325	2.27381	2.2739	2.19129	LOC104419641	ubiquitin-conjugating enzyme E2 28
Eucgr.B00983	41.5379	40.0855	43.679	26.9846	23.5103	22.166	46.167	43.3501	39.3784	20.966	19.577	19.2754	LOC104423330	uncharacterized LOC104423330
Eucgr.G03313	0	0	0	0.256838	0	0	0	0	0	0	0	0
Eucgr.K03334	0	0	0	0	0	0	0	0	0	0	0	0
Eucgr.F03157	0	0	0	0	0	0	0	0	0	0.487152	0.563569	0.766869
Eucgr.J01984	0	0	0	0	0	0	0	0	0	0	0	0
Eucgr.G00524	0	0	0	0	0	0	0	0	0	0	0	0	LOC104454705	GDSL esterase/lipase At1g09390-like
Eucgr.G01407	5.7723	11.3089	5.39196	7.362	7.6149	5.82961	9.58171	6.43378	7.9154	6.25007	6.0666	6.87124
Eucgr.C01302	0	0.312763	0	0.122647	0	0	0.569915	0.352648	0.615767	0.414484	0.537684	0.727417
Eucgr.D01229	6.95503	3.06752	3.64232	0.957852	2.98394	1.37098	4.06671	3.95098	1.82739	1.41118	2.28319	0.393463
Eucgr.K02168	15.7868	15.6348	18.7853	5.57006	6.24332	3.81121	7.15946	6.11362	6.17444	12.4816	11.4874	9.30937	LOC104425736	hypothetical protein
Eucgr.H03963	0	0	0	0	0	0	3.26916	4.03477	3.383	2.35127	2.74401	3.68275
Eucgr.I01012	0.682935	0	0	0	0	0.712594	0	0	0	0	0	0
Eucgr.F00787	0	0	0	0	0	0	0	0	0	0	0	0
Eucgr.J00595	126.831	136.06	143.444	42.8348	46.6477	50.8698	103.774	104.227	108.454	37.338	38.5018	37.9163	LOC104421378	outer envelope protein 61
Eucgr.E04064	0	0	0	0	0	0	0	0	0	0.3459	0	0	LOC104447596	uncharacterized LOC104447596
Eucgr.C00440	0.066327	0.192526	0	3.60846	3.33981	1.26989	0.362578	0.561209	0.159874	8.30378	10.5971	9.59891	LOC104436156	uncharacterized LOC104436156
Eucgr.D01928	6.21352	6.81834	6.88846	5.08964	4.09173	3.46847	9.91623	10.3076	9.17484	7.61655	7.38327	7.5753	LOC104441804	calcium-dependent protein kinase 26
Eucgr.C04397	0	0	0	0	0	0	0	0	0	0	0	0
Eucgr.G01085	30.5381	29.9152	24.6481	29.0864	33.7129	29.783	36.4344	28.3812	30.3745	35.5287	36.7917	33.0723	LOC104452984	phosphoglycerate mutase-like protein 1
Eucgr.F04137	1.31255	0.347346	0.77815	1.26544	1.06765	1.57958	2.46668	3.57375	2.13925	1.00959	1.25142	1.72894	LOC104450783	sucrose transport protein SUC2
Eucgr.A00698	0	0	0	0.074485	0.050579	0	0	0	0	0.005131	0	0
Eucgr.C00127	0	0	0	0.85481	0.196058	0	0	0	0	0.456075	0.941159	0.456401
Eucgr.J01114	18.4673	15.2578	20.9938	56.326	62.9337	36.8156	20.6618	13.7249	12.2148	74.0167	74.754	73.3737
Eucgr.I01131	0.596721	2.16382	1.03413	0.678231	0.619277	0.151072	0.827005	0.805336	1.01425	0.545292	0.181924	0.457142	LOC104418712	uncharacterized LOC104418712
Eucgr.D02246	0.941037	0.98535	1.01009	32.6349	35.2362	16.8256	1.33889	0.855253	1.1522	29.2848	29.0382	30.3499	LOC104442065	plant UBX domain-containing protein 9
Eucgr.F03863	0.326835	0.958333	0.551349	2.93469	2.84985	1.42106	1.2042	2.18335	1.30304	16.3514	15.3642	14.9753
Eucgr.L01864	0	0	0	0	0	0	0	0	0	0	0	0
Eucgr.J03112	0	0	0	0	0	0.15819	0	0.133679	0	0	0.116747	0	LOC104423216	uncharacterized LOC104423216
Eucgr.I02057	0	0	0	0	0	0	0	0	0	0	0	0	LOC104419442	transcription factor MYB57
Eucgr.J00207	9.51442	15.3682	11.9239	4.92176	4.74342	4.37483	11.0161	8.71778	10.991	11.0106	11.7411	12.5965	LOC104421075	phosphoinositide phospholipase C 2
Eucgr.B03836	71.2771	59.6591	72.8988	4.09257	2.86712	0.924631	72.6344	122.29	62.2896	18.2331	19.4533	21.9137	LOC104433964	uncharacterized LOC104433964
Eucgr.L03111	20.292	20.7334	27.6058	32.413	41.3783	48.6544	162.5	116.104	133.986	136.5	124.91	139.229
Eucgr.K00898	7.88455	6.17578	9.63386	4.96172	5.84834	8.75454	5.0545	3.57464	3.65787	12.2109	13.2007	11.7329	LOC104424840	coumaroyl-CoA:anthocyanidin 3-O-glucoside-6''-O-coumaroyltransferase 1
Eucgr.H01714	0	0	0	0	0	0	0	0	0	0	0	0
Eucgr.F00982	0.037045	0.083047	0.151725	0	0	0	0.50947	0.343206	0.382322	1.18598	1.33384	1.29381	LOC104448349	putative multidrug resistance protein
Eucgr.E03814	0	0	0	0	0	0	0	0	0	0	0	0	LOC104447508	protein ACCELERATED CELL DEATH 6
Eucgr.J01534	32.0599	38.086	37.3615	36.2258	36.6933	32.1821	39.8607	36.4573	39.3756	47.4671	49.2987	46.8826	LOC104422126	protein-lysine N-methyltransferase Mettl10
Eucgr.K02930	20.7929	12.8444	16.9956	71.9496	45.5524	37.1672	10.6732	10.0145	8.79334	24.2107	26.7837	25.3521	LOC104426339	ABC transporter B family member 1
Eucgr.B01039	0	0	0	0	0	0	0	0	0	0	0	0.080388
Eucgr.J01391	30.5325	26.9884	27.0653	10.4494	12.2287	10.0782	39.9986	35.2646	42.0181	14.1796	10.4955	12.6692	LOC104422035	solute carrier family 25 member 44
Eucgr.L00032	0	0	0	0	0	0	0	0	0	0	0	0
Eucgr.H00812	2.93171	1.11198	3.28279	12.6503	9.57929	1.93109	2.28515	2.10033	1.75363	16.0278	17.1114	15.4631	LOC104456556	putative kinase-like protein TMKL1
Eucgr.B01699	4.29224	9.6539	4.39906	8.61628	9.5426	5.45392	7.15002	4.21256	6.11246	9.99557	10.0533	8.83138	LOC104430388	pollen-specific protein SF21
Eucgr.G01301	0.592628	0	0.482268	1.02939	1.44123	1.35082	0	0.919225	0.265397	0.196382	0.041889	0
Eucgr.D02560	19.2639	24.9119	24.1204	14.3884	15.9729	16.5947	19.8359	18.8917	17.5209	12.9597	13.4433	13.1769	LOC104442321	uncharacterized zinc finger CCHC domain-containing protein At4g19190
Eucgr.D02465	57.6407	89.7312	67.5291	67.3527	58.2326	46.7179	36.6664	40.7193	40.6828	34.9018	39.4568	37.6235	LOC104442250	3-phosphoshikimate 1-carboxyvinyltransferase 2
Eucgr.J02176	3.47606	3.7224	3.66909	0.435313	0.811844	0.627471	5.03459	3.51063	4.89627	0.863045	1.18101	1.27692	LOC104422590	ankyrin repeat domain-containing protein EMB506, chloroplastic
Eucgr.F01873	6.25246	6.98473	6.68042	12.7369	12.2626	9.84328	7.6036	4.46155	5.29342	13.0318	13.5403	11.4503	LOC104448999	inositol-pentakisphosphate 2-kinase
Eucgr.E00504	10.6984	11.6372	10.0396	15.1531	16.3567	13.848	10.8827	10.082	9.93049	19.4862	16.8763	15.5866	LOC104443751	nudix hydrolase 14, chloroplastic
Eucgr.K03362	2.21347	3.32207	3.17384	1.49327	1.93817	1.33817	4.05722	2.73654	3.30254	1.80848	1.7845	1.77098	LOC104426658	DAR GTPase 3, chloroplastic
Eucgr.E03592	0.151469	0.497617	0.386407	8.80815	9.13797	4.48906	0.681213	1.67605	0.757925	24.5657	24.644	24.5057	LOC104445475	kinesin-1
Eucgr.H03672	0	0	0	0	0	0	0	0	0	0	0.074342	0	LOC108954251	uncharacterized LOC108954251
Eucgr.J00025	10096.7	8046.73	9344.85	919.542	1155.97	1096.71	6332.49	7740.17	7710.21	2046.14	2128.32	2080.28	LOC104420900	heat shock cognate 70 kDa protein 2
Eucgr.H04066	15.9912	16.3832	19.7282	26.2765	24.657	20.177	22.4453	21.3537	21.5675	52.5457	53.3606	52.6822	LOC104415247	hypothetical protein
Eucgr.B02878	331.5	286.396	315.021	280.538	228.826	172.325	266.001	288.143	290.891	356.655	373.804	372.719	LOC104433177	ATP synthase subunit beta, mitochondrial
Eucgr.B02817	5.28125	6.94872	6.038	2.34207	2.93593	1.68932	6.65146	6.39126	6.27275	4.13431	4.8695	4.32983	LOC104433146	protein N-methyltransferase NNT1
Eucgr.F04274	0	0	0	0	0	0	0	0.412234	0	0	0	0
Eucgr.H00408	0.960885	2.14895	1.07302	1.35041	0.912091	0.663914	1.24325	1.07206	0.757517	0.505654	0.415049	0.741619	LOC104456263	U11/U12 small nuclear ribonucleoprotein 35 kDa protein
Eucgr.L02313	0	0	0	0	0	0	0	0	0	0	0	0
Eucgr.E00506	0	0	0	0	0	0	0	0	0	0	0	0	LOC104445984	subtilisin-like protease SBT1.4
Eucgr.J02582	100.968	80.3205	113.065	77.4758	72.4458	58.3589	144.509	139.804	149.123	172.753	180.403	179.423	LOC104422879	protein STRUBBELIG-RECEPTOR FAMILY 7
Eucgr.B00682	0	0	0	0	0	0	0	0	0	0	0	0
Eucgr.F02174	70.6627	83.0409	76.5574	97.2619	87.8611	110.208	105.957	102.669	110.402	35.6027	34.8232	36.4859	LOC104449206	glutamyl-tRNA reductase 1, chloroplastic
Eucgr.B03428	17.012	6.3422	13.3221	25.4113	20.6515	23.9247	1.61403	0.926831	0.98183	0	0.120767	0.147418	LOC104433618	cullin-3B
Eucgr.G03067	68.2017	65.1188	100.186	1002.92	774.648	684.81	243.287	158.904	165.252	551.88	561.131	563.922	LOC104454400	zinc finger CCCH domain-containing protein 29
Eucgr.G01900	3.14502	3.02183	2.22873	4.38544	4.36362	4.06507	3.36493	3.41521	2.27825	2.83811	3.02301	3.81939	LOC104453505	uncharacterized LOC104453505
Eucgr.L03339	4.71929	4.75507	4.59608	1.55847	1.4181	1.33873	3.04231	3.36566	4.70937	1.6614	0.558112	1.06246
Eucgr.H04715	0.697314	0.299808	0.785765	0	0	0	0.30731	0.70113	0.864039	0	0	0
Eucgr.E00263	89.6664	81.7713	77.645	89.0559	80.7737	62.8915	110.026	103.404	109.431	55.783	50.6044	53.4961	LOC104443532	inositol-tetrakisphosphate 1-kinase 1
Eucgr.J02243	45.4955	40.851	47.1655	15.2183	10.9122	7.49254	16.5019	17.4962	17.4609	7.54648	7.87488	7.57911	LOC104422638	glycosylphosphatidylinositol anchor attachment 1 protein
Eucgr.L02435	2.26341	1.63161	1.59701	9.29698	6.92684	6.78944	6.02503	5.73265	8.06811	3.09998	2.39841	2.55687
Eucgr.C02576	0	0	0	0	0	0.147452	0	0	0	0	0	0
Eucgr.D01411	0	0	0	0	0	0	0	0.09585	0	0	0	0	LOC104441470	uncharacterized LOC104441470
Eucgr.L03664	2.86878	3.53719	3.98642	10.5562	11.975	6.68622	1.33077	1.28577	1.13361	6.72079	5.46162	5.75429
Eucgr.C00306	0.742513	0	0.597816	0.60968	0.964566	0.376567	1.6875	0.95445	1.24607	0	0.83437	0.66665
Eucgr.E02566	0	0	0	0	0	0	1.1398	0.103221	0.109887	0.543254	0.168012	0.241551	LOC104444931	uncharacterized LOC104444931
Eucgr.K02314	272.262	176.159	239.253	107.041	81.5406	59.1663	102.112	104.826	101.397	52.7877	52.6781	52.4685	LOC104425874	dolichyl-diphosphooligosaccharide--protein glycosyltransferase subunit STT3B
Eucgr.H01925	0.646196	0.710913	1.62326	94.369	56.2473	59.3292	1.971	2.88924	2.40714	73.6431	70.3735	78.7753	LOC104457218	lysM domain receptor-like kinase 4
Eucgr.G02462	4.00751	3.29396	1.8803	2.8415	2.05518	1.99388	2.45212	2.60363	2.55973	2.93552	4.08102	3.41894	LOC104453911	hypothetical protein
Eucgr.K02700	28.1549	28.4562	26.8431	34.1983	38.312	39.9273	37.6559	29.9317	29.5422	21.6935	23.3905	23.1617	LOC104426135	protein MICRORCHIDIA 7
Eucgr.H00588	68.8081	67.0001	68.1816	34.8264	28.4924	21.8906	42.0339	53.1943	41.6725	28.7025	26.4968	27.8809	LOC104456394	transmembrane 9 superfamily member 2
Eucgr.I00196	7.50905	5.62002	6.15289	1.76299	1.02255	0.677907	13.5815	16.4633	11.7143	1.59882	1.91301	1.92595	LOC104420143	U-box domain-containing protein 26
Eucgr.F02033	157.362	165.68	159.032	71.3173	64.2786	60.7262	82.5913	89.1916	78.2364	67.1747	70.3421	69.391	LOC104449107	heterogeneous nuclear ribonucleoprotein 1
Eucgr.D02129	9.5962	7.69363	10.7344	13.7504	11.0927	15.5734	4.87571	4.70166	4.28497	5.97599	5.81489	4.72315	LOC104441964	GATA transcription factor 26
Eucgr.K00533	0	0	0	0	0.123605	0.126634	0	0	0	0.010741	0.042232	0.01534	LOC104424599	rust resistance kinase Lr10
Eucgr.K01999	6.25354	4.97817	5.80628	3.38778	2.73088	2.80983	1.70643	2.19572	1.72192	2.30596	2.02887	2.72159
Eucgr.E00956	0	0	0	0	0	0	0	0	0.136395	0.165541	0	0.338331
Eucgr.C04292	0	0	0	0	0	0	0	0	0	0	0	0
Eucgr.K00732	70.2504	87.0025	81.8373	36.5038	29.6513	25.6725	57.545	55.5276	71.9204	42.4774	44.871	42.0111	LOC104424708	protein disulfide isomerase-like 2-3
Eucgr.B03944	12.173	12.8168	12.1553	0	0.093587	0	16.5164	14.5738	15.7216	1.01895	1.03628	1.49008	LOC104434066	WAT1-related protein At5g40240
Eucgr.G03127	31.9752	14.213	25.0538	65.5399	42.7064	59.4209	18.4667	12.4177	12.4457	43.6957	40.4213	35.9681
Eucgr.I02355	0.161622	0	0.202864	0	0	0	0.042412	0.191582	0	0.086063	0	0
Eucgr.H01004	80.6395	76.4387	85.4319	55.2086	59.7053	67.8561	42.957	46.5413	42.9008	38.7427	40.4215	37.4678	LOC104456676	DEAD-box ATP-dependent RNA helicase 24
Eucgr.K01040	9.60383	11.6829	11.2252	11.0036	9.30386	5.46083	12.0627	10.8074	12.6904	20.4298	24.2938	21.9433	LOC104424928	dihydroorotase, mitochondrial
Eucgr.H00285	0.072561	0.417501	0.339909	0	0.167472	0	0.819541	1.14269	0.912997	0	0	0	LOC104456191	uncharacterized LOC104456191
Eucgr.B03742	7.93054	14.0763	10.0403	3.46845	4.34152	3.1326	3.63083	12.489	8.61503	3.0917	2.78375	3.36069	LOC104433881	flavonoid 3',5'-hydroxylase 2
Eucgr.L03395	0	0	0	0	0	0	0	0	0	0	0	0
Eucgr.I02315	2.65499	3.81005	2.16977	2.05498	3.16585	1.96163	3.28658	2.4203	3.49473	1.52113	1.34097	1.62564	LOC104419630	methyltransferase-like protein 23
Eucgr.I00476	0.12269	0	0.034733	0.04379	0.04532	0.106379	0.613941	0.704697	0.907978	0.816074	0.513152	0.807372
Eucgr.G01756	0	0	0	0	0	0.37135	0	0.130594	0	0.196939	0.488192	0
Eucgr.C00546	28.738	28.9554	33.0007	1.82047	0.735666	0.922709	59.9248	73.093	56.3527	2.91936	6.06762	3.56034	LOC104436216	dehydration-responsive element-binding protein 3-like
Eucgr.J01593	0	0	0	0	0	0	0.218605	0	0	0	0	0.311882	LOC104422155	uncharacterized LOC104422155
Eucgr.F03970	0.473418	0.57944	0.068023	1.20893	1.63515	0.641979	0.546661	0.841148	1.28819	0.917696	0.778697	0.80839
Eucgr.G03210	18.6277	24.5915	21.1498	16.9688	15.7887	9.36517	16.5233	15.3482	15.4251	12.4167	14.4402	14.8985	LOC104454521	cilia- and flagella-associated protein 20
Eucgr.D00496	0	0	0	0	0	0	0.818818	2.88767	2.25252	3.6839	3.93493	3.29332	LOC104442611	senescence-specific cysteine protease SAG12
Eucgr.K02947	0	0	0	0	0.389299	0	0	0	0	0.266342	0	0.118991	LOC104426349	macrophage migration inhibitory factor homolog
Eucgr.L00316	0	0.213191	0.203847	0	0	0	0	0	0	0	0	0
Eucgr.F00191	15.7855	13.5503	16.0293	43.348	38.3363	43.0579	39.0236	39.6765	41.8921	26.1027	29.2861	26.4527	LOC104447871	uncharacterized LOC104447871
Eucgr.B03651	3.79227	4.41647	5.10752	1.25432	0.99175	0.866765	4.94384	5.14205	3.7561	2.45737	2.59578	2.45516	LOC104433811	pentatricopeptide repeat-containing protein At5g59600
Eucgr.H03169	18.5247	14.2359	17.6105	8.5932	6.2029	5.72606	7.97161	7.6547	7.26359	2.40845	2.31887	2.57495	LOC104414581	protein transport protein Sec23A
Eucgr.D00902	0	0	0	0	0	0	0	0	0.102047	0	0	0	LOC104441164	G-type lectin S-receptor-like serine/threonine-protein kinase RKS1
Eucgr.J03010	0	0	0	1.59075	0.203116	0	0	0.353293	0	1.25269	2.45856	2.18206
Eucgr.I02779	24.9087	35.5661	31.9384	12.7198	15.0212	12.5102	28.4478	24.4179	24.1666	29.4272	26.9957	28.2996	LOC104420012	KH domain-containing protein At1g09660/At1g09670
Eucgr.B03652	14.379	6.02407	10.9904	16.9838	16.2169	17.4133	18.6129	14.5604	12.1262	32.7021	31.3585	33.0615	LOC104433812	hypothetical protein
Eucgr.B04023	1.72247	0.816846	1.72004	1.62993	2.03877	0.290475	0.480147	1.09665	0.231935	1.17164	0.8408	1.27973	LOC104435754	transcription repressor OFP1
Eucgr.G01720	732.103	863.851	982.783	624.783	469.331	400.071	504.501	604.441	585.783	105.394	112.998	106.56	LOC104453372	squalene synthase
Eucgr.F03211	20.7527	26.984	25.1466	15.9067	14.4689	14.8344	17.3335	18.4913	19.1967	12.676	13.3539	12.4877	LOC104450046	ubiquitin carboxyl-terminal hydrolase 15
Eucgr.K01241	0.949379	0.831117	1.82543	0	0	0	1.32868	1.32184	0.218912	0.122158	0.057172	0	LOC104427319	protein CNGC15b
Eucgr.K01380	0	0	0	0	0	0.302781	0	0	0	0	0	0	LOC104425196	uncharacterized LOC104425196
Eucgr.F01649	0	0	0	0	0	0	0	0	0	0	0	0
Eucgr.L02499	0.382487	0.169829	0.18523	0	0	0	0.48383	0.566441	0.142858	0	0	0	LOC104430751	uncharacterized LOC104430751
Eucgr.E01798	0.427619	0.377615	0.36587	0.547709	0.824489	0.524416	0.544932	0.244455	0.453602	0.583464	0.288958	0.275492	LOC108959513	26S proteasome non-ATPase regulatory subunit 10-like
Eucgr.E03117	0.570502	0.790631	1.27618	1.92472	2.04853	2.33201	0	0	1.19557	1.49734	1.21266	1.37105
Eucgr.B02435	0	0	0	0	0	0	0	0	0	0	0	0	LOC104435350	WUSCHEL-related homeobox 3
Eucgr.L03147	0	0	0	0	0	0	0	0	0	0	0	0
Eucgr.I00001	0	0	0	0	0	0	0	0	0	0	0	0	LOC104420060	F-box/kelch-repeat protein At3g23880
Eucgr.C02074	0.083706	0.400075	0.131805	0.514542	0.504968	0.236389	0	0	0	0	0	0	LOC104437218	TMV resistance protein N
Eucgr.G01822	0	0	0.341729	0	0.169019	0	0.726091	0.494363	1.25571	0.607033	0.425272	0.559367
Eucgr.L01095	25.9337	16.3817	27.4208	9.06034	5.70702	10.0904	24.6436	21.7859	22.8419	1.69202	1.09097	1.98366
Eucgr.E04103	17.8234	42.7135	18.8285	4.67213	3.11312	1.88372	31.1177	50.5122	53.1849	8.90244	10.4168	8.92694	LOC104445734	beta-glucosidase 46
Eucgr.G01152	0	0	0	0	0	0	0.245726	0.115931	0.23811	11.3242	11.8471	9.65623	LOC104453039	pathogenesis-related protein 1
Eucgr.E00918	0	0	0	0	0	0	0.042349	0.04108	0.062788	0.076397	0.071753	0.081904
Eucgr.H00881	1.60405	1.08979	0.999894	0.474834	1.60177	0.938823	1.74871	1.5051	1.8628	1.29363	0.69471	0.918572
Eucgr.D02111	0.223295	0	0	3.5491	4.35135	0.960483	0.039394	0.785822	0.654501	10.8799	10.3946	11.274	LOC104441945	ethylene-responsive transcription factor 5
Eucgr.F02164	18.0962	14.866	20.205	5.65916	4.42997	3.54689	5.66987	8.52814	4.0311	5.3143	4.13675	4.54658	LOC104449200	pentatricopeptide repeat-containing protein At1g09900
Eucgr.D00736	1.71146	2.39842	2.01814	17.7932	16.0091	15.6166	1.73458	1.84791	1.70338	9.60276	9.68093	9.97561	LOC104441092	TMV resistance protein N
Eucgr.F00791	0	0	0	0	0	0	0	0	0	0	0	0
Eucgr.K02857	12.5097	16.6109	11.5405	2.33622	2.26114	3.38162	6.17759	5.99137	4.3857	1.86081	1.53935	3.86338	LOC104426275	protein DELETION OF SUV3 SUPPRESSOR 1(I)
Eucgr.H00188	4.03701	5.13451	5.15365	0.417378	0.202813	0.180597	15.5453	15.4789	15.6184	5.01472	4.90078	4.75864	LOC104456117	cellulose synthase-like protein G2
Eucgr.E01949	0	0	0	0	0	0	0	0	0	0	0	0	LOC104446519	gibberellin 2-beta-dioxygenase 8
Eucgr.C03298	6.65383	10.557	6.46703	7.86132	5.70525	3.15277	13.3116	11.6737	9.2671	3.08882	3.46468	3.37716	LOC104438012	uncharacterized LOC104438012
Eucgr.K00981	0.181919	0	0	0	0	0	0	0	0	0	0	0
Eucgr.D00599	11.1891	10.2685	8.02409	6.82146	5.20459	7.01831	4.15682	3.05227	3.50334	7.27023	7.17427	6.76836	LOC104440992	protein NUCLEAR FUSION DEFECTIVE 6, chloroplastic/mitochondrial
Eucgr.J02306	0.930474	1.18508	1.18014	0.330899	0.265148	0.726096	1.11204	0.59627	0.803726	0	0.38617	0.337091	LOC104422684	cytochrome c1-2, heme protein, mitochondrial
Eucgr.G02566	8.96796	8.16088	9.60775	3.96365	3.2596	2.42671	6.08533	6.26166	6.82068	5.10769	6.09819	5.0363	LOC104453998	uncharacterized LOC104453998
Eucgr.B03855	0	0	0	0	0.022935	0	0	0	0	0	0	0	LOC104433981	transcription factor TGA2.2
Eucgr.I02210	26.4499	23.9886	29.8989	4.85933	3.97032	5.39978	15.5002	15.9205	15.215	10.8002	10.2881	9.02685	LOC104419562	uncharacterized LOC104419562
Eucgr.C01352	0	0	0	0	0	0	0	0	0	0	0	0
Eucgr.K02539	10.5564	18.6769	12.7864	4.89717	4.22458	1.84546	12.9264	9.42999	11.0456	6.51446	4.95756	4.10611	LOC104426027	cleavage stimulation factor subunit 50
Eucgr.L02208	6.05471	7.63224	8.46094	14.1412	12.4187	13.2562	17.7047	14.1348	16.3438	10.1793	11.8148	12.6724	LOC104430423	uncharacterized LOC104430423
Eucgr.L02674	0	0	0	0	0	0	0	0	0	0	0	0
Eucgr.L00255	0	0	0	0	0	0	0	0.159062	0	0	0	0
Eucgr.C00225	0	0	0	0	0	0	0	0	0	0	0	0
Eucgr.D00578	12.3176	7.84069	8.51869	14.562	13.6775	12.5835	3.79261	2.7281	3.55023	5.82752	6.0037	8.04735	LOC104440969	uncharacterized LOC104440969
Eucgr.I02508	21.724	40.7795	23.6597	3.89781	3.59599	1.40603	21.0327	20.4743	16.936	8.63065	11.0235	12.3506	LOC104419809	uncharacterized LOC104419809
Eucgr.A00156	0	0	0	0	0	0.33201	0	0	0	0	0	0	LOC104451230	major pollen allergen Bet v 1-A
Eucgr.D01705	165.577	394.186	213.358	3.04969	2.13788	0	81.7162	121.294	143.941	4.29924	4.8997	2.61094
Eucgr.H04309	0.166989	0.050099	0	0.095307	0	0	0	0	0	0	0	0	LOC104415410	uncharacterized LOC104415410
Eucgr.H00325	9.34274	4.00087	9.99365	25.2453	15.9642	21.6442	34.9815	31.2433	35.6163	13.3519	10.2893	12.1504
Eucgr.J03139	0.395236	0.571386	1.36523	0.230034	0	0	0.787696	1.79664	1.59189	0.858488	0.360417	0.189157
Eucgr.H01807	0	0	0	0	0	0	0.091946	0	0	0	0	0
Eucgr.B00225	1.31176	0.926058	1.41508	0.073043	0.18158	0.398092	0.482829	1.09673	0.62759	0.168641	0.027824	0.030335	LOC104417749	C2 and GRAM domain-containing protein At5g50170
Eucgr.L00341	0.2469	0.298968	0.111205	0.26878	0.243161	0.253631	0.412898	1.32039	1.20199	0.890487	2.7533	2.18685
Eucgr.J01210	11.4425	6.18406	9.71365	12.6372	11.6011	8.16941	8.47213	11.3483	9.71375	14.3386	10.7649	13.6173
Eucgr.C04385	0	0	0	0	0	0	0	0	0	0	0	0	LOC104440573	putative F-box/LRR-repeat protein At5g02930
Eucgr.H04866	0.117694	0.226486	0.167138	0.091383	0.135667	0.04717	0	0	0.152185	0.07413	0.37724	0.150545	LOC104415834	alkane hydroxylase MAH1
Eucgr.K00946	104.964	116.801	138.94	95.259	96.0809	71.8046	169.349	136.673	157.94	97.1302	96.297	95.7713	LOC104424874	probable protein phosphatase 2C 52
Eucgr.A00417	2.69176	4.58574	4.38793	1.4314	1.65536	1.45835	6.24527	6.20848	5.87715	3.10257	2.88127	2.54117	LOC104455112	uncharacterized LOC104455112
Eucgr.J02962	68.7295	91.0396	81.8505	42.1047	39.5868	31.0878	75.3391	86.1129	87.148	96.8649	96.7467	92.7422	LOC104423099	ras-related protein Rab7
Eucgr.A00798	17.8852	15.6416	18.2304	12.2634	11.729	9.03929	9.42943	11.8677	9.89997	6.68831	7.07752	6.85685	LOC104454067	pentatricopeptide repeat-containing protein At2g15690
Eucgr.H03601	4.88545	11.3099	4.30339	2.7187	1.98671	1.23662	6.42089	8.09243	7.45946	3.80672	3.61511	3.41494	LOC104414900	uncharacterized LOC104414900
Eucgr.H02927	0	0	0	0	0	0	0	0	0	0	0	0
Eucgr.F02579	86.7321	86.7419	97.4468	51.2375	56.4685	60.0997	45.1154	38.3449	43.447	41.4126	42.3967	41.5371	LOC104449497	ran-binding protein 10
Eucgr.H00699	4.94717	6.38917	6.38007	11.0593	13.582	11.2959	7.80276	6.03808	5.20468	6.28059	7.13815	7.3489
Eucgr.D00635	0.433097	0.093364	0.154161	3.01416	2.11624	0.696509	0.328025	0	0	2.58665	2.2381	2.33787	LOC104441024	tetraspanin-19
Eucgr.H03719	2.46712	2.28216	2.189	1.28286	1.17046	0	0	0	0	0.263587	0	0.046521
Eucgr.K02411	0	0	0	0	0	0	0	0	0	0	0	0	LOC104427698	probable glycosyltransferase At5g03795
Eucgr.B01307	0.639729	0.545157	1.21492	0.137773	0.430246	0	0.475019	0.536739	0.221722	0.112887	0.101751	0.229639	LOC104426148	flowering-promoting factor 1-like protein 3
Eucgr.G01439	2.84066	3.73789	1.20051	2.01469	4.46749	3.57856	6.92439	7.66583	6.58586	5.49576	5.08077	6.73623	LOC104453199	LAG1 longevity assurance homolog 2
Eucgr.G00688	0	0	0	0.248861	0.201391	0.070809	0.877007	0.47139	0.170768	0.938438	0.741157	0.76955	LOC104452777	uncharacterized LOC104452777
Eucgr.G00996	0	0	0	0	0	0	0	0	0	0	0	0	LOC104455163	receptor-like protein 12
Eucgr.G02639	0	0	0	0	0	0	0	0	0	0	0	0	LOC104455781	3-hydroxyisobutyryl-CoA hydrolase 1
Eucgr.L02141	0	0	0	0	0	0	0	0	0	0	0	0
Eucgr.K00051	0	0	0	0	0	0	0	0	0	0	0	0	LOC104426920	ankyrin-1
Eucgr.G02425	115.492	128.462	127.48	51.4731	60.3759	64.396	133.396	153.849	157.339	92.7335	95.9487	96.6956	LOC104453877	uncharacterized LOC104453877
Eucgr.G02127	0	0	0.047069	0.280602	0.051113	0.212364	0.146598	0.132314	0.042715	0.261077	0.344716	0.25864	LOC104455636	uncharacterized LOC104455636
Eucgr.E00699	0.466188	0.571101	0.482944	0.138321	0.171736	0	0.193725	0.073674	0.09798	0	0	0	LOC104446049	putative inactive disease susceptibility protein LOV1
Eucgr.J01149	29.0861	28.1853	21.4394	47.2179	43.1703	36.2599	12.6638	15.7784	14.941	38.2397	29.0918	33.5414	LOC104421838	histone H4
Eucgr.E02513	0	0.263792	0	0	0	0	0	0	0	0	0.286014	0	LOC104444911	TMV resistance protein N
Eucgr.C02177	43.443	44.7648	43.0743	53.3646	59.5355	34.7526	46.0051	46.0114	44.6105	78.087	81.9258	79.3428	LOC104437302	biotin carboxylase 2, chloroplastic
Eucgr.G02402	4.1037	2.65757	3.94687	11.7952	14.2308	12.5209	2.76551	3.28503	2.53413	2.74401	2.84666	2.42421
Eucgr.D00032	0	0	0	0.449262	0.482805	0.965917	0	0	0	0	0.144198	0	LOC104440620	uncharacterized LOC104440620
Eucgr.J01962	0	0	0.097591	0	0	0.111281	0.065341	0	0	0.399604	0.793795	0.757993	LOC104422436	UDP-glucose iridoid glucosyltransferase
Eucgr.C00786	92.7745	82.6863	99.0526	51.267	42.6295	49.4849	72.8453	82.5253	72.3873	29.7019	29.9347	30.7207	LOC104436396	probable polygalacturonase
Eucgr.E02784	0	0	0	0	0	0	0	0	0	0	0	0
Eucgr.A00800	23.6386	21.4472	24.5529	18.4349	15.5845	13.2858	14.8511	18.7255	16.6567	12.3751	11.3836	13.6502	LOC104432896	pentatricopeptide repeat-containing protein At2g15690
Eucgr.H04367	6.88996	6.9623	9.35267	6.05971	8.07125	21.0838	75.5857	78.4452	50.1411	41.8042	38.9644	42.151	LOC104415448	probable aldo-keto reductase 1
Eucgr.C00445	1.09259	1.67651	1.79897	1.36055	1.61299	0.714229	1.93698	2.13776	2.84644	2.43835	1.42741	0.957315	LOC104436159	probable flavin-containing monooxygenase 1
Eucgr.H03706	0	0	0	0	0.642866	0.183144	0	0	0	0.192954	0.090005	0
Eucgr.G01264	3.91766	4.6699	4.266	3.13038	3.73713	2.47775	4.3029	3.54888	3.35557	7.52315	7.87995	7.18722	LOC104453104	FAD-linked sulfhydryl oxidase ERV1
Eucgr.L03268	0	0	0	0	0	0	0	0	0	0	0	0
Eucgr.J02369	0.720625	0.421502	0.461597	8.73676	5.56553	7.48237	4.98154	4.62637	4.36447	9.58379	9.36363	10.1822	LOC104422719	AAA-ATPase At3g50940
Eucgr.A01514	0.953066	0.153478	1.11383	28.241	19.1373	15.2275	0.278252	0.242418	0.23165	14.6985	13.7579	14.55	LOC104438171	purple acid phosphatase 22
Eucgr.L01961	27.3163	12.3075	17.9674	329.411	393.826	627.722	7.25462	7.58874	5.21496	282.908	292.065	283.356	LOC104430154	miraculin
Eucgr.L00105	0	0	0	0	0	0	0	0	0	0	0	0
Eucgr.L01047	0	0	0	0	0	0	0	0	0	0	0	0	LOC104429144	crocetin glucosyltransferase, chloroplastic
Eucgr.F01132	5.35101	5.18602	5.7097	4.97572	4.85729	3.59274	56.3632	60.4051	51.564	48.0308	49.716	46.0469	LOC104448445	probable disease resistance protein At4g27220
Eucgr.E02374	0	0	0	0	0	0	0	0	0	0	0	0	LOC104446735	receptor like protein 30
Eucgr.G01519	0	0	0	0	0	0	0	0	0	0	0	0
Eucgr.D01704	162.281	138.644	145.037	118.921	132.753	104.239	71.203	80.5632	71.3883	102.2	103.987	105.473	LOC104441633	kinesin light chain 4
Eucgr.L00175	0	0	0	0	0.054044	0	0.186121	0	0	0	0.332323	0
Eucgr.A02855	26.9146	37.6544	12.0975	0.825404	1.16022	0.97095	32.1224	36.0332	34.9829	0.589699	0.899701	0.895669
Eucgr.D01074	35.6856	36.0573	40.5148	42.7728	47.1033	52.6341	40.172	38.8835	39.8564	39.0615	39.7139	38.7165	LOC104441278	uncharacterized LOC104441278
Eucgr.F02776	2.17874	0.684468	2.13823	0.546632	0.638457	0.504417	0.312316	0.459381	0	0.374184	0	0.759246	LOC104449661	protein STAY-GREEN LIKE, chloroplastic
Eucgr.B00289	1.60277	0.96722	1.8164	6.74525	7.66528	4.03471	0.351947	0.82037	0.580952	1.30042	0.480712	0.336928
Eucgr.G00693	1.3632	0.492508	0.882809	2.38927	4.12598	2.76008	0.790594	0.470765	0.352079	0.386782	0.248914	0.477666
Eucgr.I01170	0	0	0	0	0.198748	0	0	0	0	0	0	0
Eucgr.L02166	0	0.165813	0	0	0	0.192956	0.624028	0.160338	0.464822	0	0	0	LOC104430380	uncharacterized LOC104430380
Eucgr.E02924	0	0	0	0	0	0	5.8892	3.37558	6.9816	5.17794	8.07844	4.95941
Eucgr.A01358	13.7919	9.53741	12.3152	11.0987	7.74653	5.00397	1.96674	2.00192	1.86559	4.56732	3.82047	3.09776	LOC104437022	transcription termination factor MTERF4, chloroplastic
Eucgr.B02229	30.7351	32.9332	30.1564	30.436	32.5451	25.8246	48.9274	51.7874	53.5618	25.2157	24.428	24.1771	LOC104432624	inactive receptor-like serine/threonine-protein kinase At2g40270
Eucgr.J01015	0.308435	0.37087	0.705952	2.10866	2.50116	1.58452	0.900504	0.240453	0.418266	1.53085	1.39932	1.47601	LOC104423527	beta-D-glucosyl crocetin beta-1,6-glucosyltransferase
Eucgr.J00340	24.0131	23.7186	23.0532	22.1883	25.112	27.6713	18.7774	14.3762	14.7074	15.0249	15.1967	15.7164	LOC104421195	helicase-like transcription factor CHR28
Eucgr.L01637	0	0	0	0	0	0	0	0	0	0	0	0
Eucgr.H04369	0	0	0	0	0	0	0	0	0	0	0	0	LOC104415450	probable aldo-keto reductase 1
Eucgr.H01597	7.55788	8.69467	8.3447	17.011	23.0187	28.019	5.48481	3.67723	4.9093	8.4603	7.32708	9.44317	LOC104416601	sugar transporter ERD6-like 7
Eucgr.C03065	0.058786	0	0.216142	0.223787	0.231582	0	1.18509	0.361827	0	0	0.518715	0.846996
Eucgr.H02861	0.050081	0	0	1.1275	0.398567	0.32218	0	0.100862	0	1.73447	1.35194	1.08869	LOC104417154	receptor-like protein kinase 2
Eucgr.C03943	77.6732	62.8635	67.1532	86.5767	74.0128	61.4137	1.61721	2.50665	1.24804	1.03616	0.846565	1.30681	LOC104438342	vacuolar-processing enzyme
Eucgr.B02400	24.5244	20.2009	23.1979	22.031	17.7074	23.0286	137.676	119.45	135.163	9.89506	7.82842	9.62567	LOC104432767	protein UPSTREAM OF FLC
Eucgr.B02030	18.7067	9.60401	16.1175	11.0639	8.41987	3.68225	5.99301	5.55424	4.39998	8.8341	7.65855	6.89294	LOC104432357	gibberellin receptor GID1C
Eucgr.H00865	0.397473	1.59491	0.912418	0.163954	0	0.179206	1.90198	0.488607	1.22888	0.206608	0	0.13994	LOC104456591	nudix hydrolase 7
Eucgr.I02582	58.2595	58.1225	55.8581	13.7938	12.0153	10.2165	27.9703	36.0325	29.5383	8.33097	9.65174	8.262	LOC104419852	hypothetical protein
Eucgr.H00606	3.63311	2.62512	2.73554	0.487506	1.15671	0.654107	1.1579	1.20027	0.676274	0.268904	0.295821	0.159067	LOC104456404	probable cyclic nucleotide-gated ion channel 20, chloroplastic
Eucgr.J02945	60.2459	69.1155	63.774	32.4881	31.0064	26.4223	86.756	77.4789	77.6198	28.335	28.6683	30.1893	LOC104423081	casein kinase 1-like protein HD16
Eucgr.B02990	0.353428	0	0.738824	0.252897	0	0.25747	0.533423	0.334272	0.292393	0	0.638677	0.462747
Eucgr.F04101	0	0	0	0	0	0	6.5072	8.3685	8.61146	0.665017	1.17875	0.923653	LOC104450751	probable leucine-rich repeat receptor-like protein kinase At1g35710
Eucgr.H05057	0.59569	0.382078	0.929314	0.261603	0.285814	0.377609	2.29035	2.47864	0.908739	0.421456	1.00393	1.11779	LOC104415953	GDSL esterase/lipase At5g08460
Eucgr.H01055	3.85099	3.8852	3.84627	6.18849	2.90094	0.956965	4.0544	7.85956	4.42035	6.53238	5.82872	6.10299
Eucgr.C03406	8.72722	6.87683	10.0113	12.1847	11.2513	11.2064	6.26322	4.35549	4.18507	10.7103	9.94711	11.8291	LOC104438066	pre-mRNA cleavage factor Im 25 kDa subunit 1
Eucgr.K00987	0	0	0	0	0	0	0	0	0	0	0.051518	0.036238	LOC104427235	protein ACCELERATED CELL DEATH 6
Eucgr.G01914	0	0	0	0	0	0	0	0	0	0	0	0
Eucgr.F02598	2.79172	2.51692	2.31606	3.34866	5.17727	2.36849	0	0	0.30781	0	0.359729	0.235738
Eucgr.B00864	0.229516	0.277191	0.107774	0	0.15561	0	0	0.062252	0	0.040084	0.238165	0.064752	LOC104434461	multicopper oxidase LPR1
Eucgr.F04114	340.531	239.214	281.206	1516.41	2007.29	2276.11	196.706	182.247	161.404	1178.84	1190.5	1170.96	LOC104450763	patellin-3
Eucgr.C01365	0	0	0	0	0	0	0	0	0	0	0	0
Eucgr.G02002	0	0	0	0	0.036218	0	0.052191	0	0	0.114368	0.121647	0.114675
Eucgr.B02820	30.0892	30.4225	26.3241	18.8554	16.6006	14.7064	55.5399	46.7476	58.391	45.0781	44.3622	45.5105
Eucgr.E00127	2.04918	0.923554	1.73729	1.77308	2.11576	2.45914	0.021483	0.156225	0	0.542048	0.378176	0.287717	LOC104445899	U-box domain-containing protein 33
Eucgr.H02451	2.22961	5.65255	2.95467	0.930304	0.583105	0.615941	2.13047	1.71	1.7782	0.669271	0.424431	0.619872	LOC104414116	D-cysteine desulfhydrase 2, mitochondrial
Eucgr.G02909	1.23364	0.563824	0.481194	1.16463	1.43407	0	0	0.87115	0	0.969525	0.357677	2.11665	LOC104454271	protein UPSTREAM OF FLC
Eucgr.B02213	0	1.02544	0.385272	0	0	0	0	0	0.145509	0	0	0
Eucgr.H03019	0.126162	0.201367	0.314134	10.3147	8.66647	3.24454	0.335324	0.761682	0.324221	13.1253	13.7898	13.0063	LOC104414470	kinesin-like protein KIN-10A
Eucgr.G02332	42.3761	40.7806	37.6273	30.0567	27.6975	23.1358	23.9224	27.5094	23.8174	30.3781	27.9878	28.4309	LOC104455709	dihydrolipoyllysine-residue acetyltransferase component 4 of pyruvate dehydrogenase complex, chloroplastic
Eucgr.B03773	53.7747	64.1588	55.2492	79.3747	102.225	92.2144	127.347	100.542	122.352	49.3728	50.0949	50.7536	LOC104433912	CBL-interacting serine/threonine-protein kinase 3
Eucgr.K02890	17.4127	16.1787	19.6941	34.7852	33.9446	25.934	33.1195	38.886	38.5141	52.2923	53.1841	51.9255	LOC104426309	protein EDS1L
Eucgr.F00978	3.29299	4.61694	3.97185	0.543173	0.675073	0	8.01333	6.03934	8.11664	6.51077	5.41362	4.17073	LOC104448348	trafficking protein particle complex subunit 3
Eucgr.C02568	0	0	0	0	0	0	0	0.06919	0	0	0	0
Eucgr.K01030	122.762	109.247	128.567	4.79025	6.63162	3.91622	128.863	102.048	121.242	6.51127	7.14533	6.58264	LOC104424919	two pore calcium channel protein 1
Eucgr.A02342	4.64442	4.69813	4.64623	2.15236	2.00985	1.84029	5.33254	4.04171	4.66653	1.08477	1.49261	1.28197	LOC104444926	pentatricopeptide repeat-containing protein At2g41720
Eucgr.H00640	0	0	0	0	0	0	0	0	0	0	0	0	LOC104416266	probable ADP-ribosylation factor GTPase-activating protein AGD15
Eucgr.H04532	99.878	113.636	93.8142	34.3209	37.1514	39.3287	93.3678	98.5071	98.2811	148.02	153.145	145.375	LOC104415597	rapid alkalinization factor
Eucgr.C02427	0	0	0	0	0	0.075509	0	0	0	0	0	0	LOC104439679	PTI1-like tyrosine-protein kinase At3g15890
Eucgr.J01158	1.40366	0.585696	1.25842	1.96712	2.02331	0.576338	0.85605	0.744191	0.890604	3.24811	2.77711	3.12107	LOC104421844	MATH domain and coiled-coil domain-containing protein At3g58410
Eucgr.B02287	1.12408	1.06331	0.736817	1.76984	1.15921	1.97357	6.67831	6.23037	7.51987	10.7456	9.60616	10.3666	LOC104432675	beta-glucosidase BoGH3B
Eucgr.H01040	4.62947	5.86463	4.42439	2.45578	2.29798	4.38355	4.48661	1.76106	2.49961	3.36307	1.74052	1.13873	LOC104456696	uncharacterized LOC104456696
Eucgr.K02987	21.4852	20.4033	22.4536	5.81556	8.07593	6.23321	21.4331	24.9361	21.1184	8.59347	8.58978	9.43626	LOC104426381	zinc finger protein VAR3, chloroplastic
Eucgr.H00586	0	0.110909	0	0	0	0	1.47744	2.80322	1.33591	0	0	0	LOC104456391	methylecgonone reductase
Eucgr.E01405	0.17608	0.131786	0.077651	0.111271	0.095897	0.135982	0	0	0	0	0	0
Eucgr.F02553	0.162932	0.118301	0.346877	0	0	0	0	0.524936	0	1.53309	1.75594	1.86706	LOC104449472	uncharacterized LOC104449472
Eucgr.L03167	0	0	0	0	0	0	0	0	0	0	0	0
Eucgr.C00147	2.04944	15.0054	3.24529	12.6196	7.65611	6.53052	25.2472	21.348	23.2686	31.2152	32.3035	31.5785	LOC104435951	serine carboxypeptidase-like 17
Eucgr.H04721	6.18714	5.05535	6.74344	8.59941	6.27576	2.51604	2.71545	6.37177	4.47773	6.40287	6.26984	5.04909	LOC104415739	nucleobase-ascorbate transporter 11
Eucgr.D02426	0.133532	0	0.006689	0.225994	0	0	0	0	0	2.84978	2.59297	0.818183
Eucgr.H01259	39.5954	40.147	44.2486	25.4309	26.7701	18.5297	51.1106	43.3464	35.8415	29.3333	31.7328	29.0646	LOC104456863	probable protein phosphatase 2C 80
Eucgr.J02571	5.09533	8.80378	7.32391	0	0	0	6.54967	6.66857	7.54212	0	0	0	LOC104424013	diacylglycerol O-acyltransferase 2-like
Eucgr.C00353	129.522	175.008	150.258	29.4559	34.0352	26.5504	156.93	156.96	162.71	36.321	38.8676	37.7441	LOC104436095	ubiquitin carboxyl-terminal hydrolase 23
Eucgr.H01118	0	0	0	0	0	0	0.24978	0.187319	0.294463	0.197469	0	0
Eucgr.K01046	0.668782	0.866852	0.377573	3.65997	2.21328	1.43911	1.43267	1.05173	0.7578	4.23542	4.68325	4.34801	LOC104424934	squamosa promoter-binding protein 1
Eucgr.L02245	25.0219	19.4294	20.3702	79.1871	72.7452	83.2052	72.1678	53.7125	56.4042	120.927	119.309	107.233	LOC104430458	uncharacterized protein At5g01610
Eucgr.I01249	0	0	0	0	0	0	0	0	0	0	0	0
Eucgr.L03230	4.05654	3.63996	3.61648	0.453846	1.25087	1.5126	0	0	0	0	0	0
Eucgr.H04931	0	0	0	0	0.089545	0.125089	0.231492	0.271382	0.22374	0.14613	0.022696	0.104789
Eucgr.B01078	0	0	0	0	0	0	0	0	0	0	0	0
Eucgr.G01670	0	0	0	0	0	0	0	0	0	0.086597	0.039144	0	LOC104453331	uncharacterized LOC104453331
Eucgr.L00742	57.3185	16.3344	59.6367	164.815	133.733	83.1761	129.854	75.2392	70.0327	164.909	120.987	159.266	LOC104428806	hypothetical protein
Eucgr.G02427	0.094797	0	0	0	0	0	0.201004	1.03801	0.709747	0	0	0.096702	LOC104453879	MADS-box protein CMB1
Eucgr.E00895	0	0.41706	0	0.11642	0	0	0	0	0	0	0	0
Eucgr.G00466	0	0	0	0	0	0	0	0	0	0	0	0	LOC104454942	UPF0496 protein At4g34320
Eucgr.H03172	27.5765	37.8215	38.3082	12.9055	10.2931	8.20945	33.4355	27.9485	29.0794	17.1575	18.146	18.7264	LOC104414585	rRNA-processing protein EFG1
Eucgr.E04231	40.544	52.7653	49.0305	99.9261	98.7107	67.5411	43.7221	31.1535	33.7197	86.3188	81.6907	79.7984	LOC104447696	uncharacterized LOC104447696
Eucgr.L03702	0	0.185965	0.152672	0	0	0	0	0.437248	0	0	0	0.230453
Eucgr.G01703	46.4529	40.6304	49.1417	67.6022	76.9954	82.1589	48.0311	53.9738	43.0513	86.1602	89.0728	84.9369	LOC104453357	BEL1-like homeodomain protein 6
Eucgr.C03071	170.882	110.593	128.506	77.6611	313.715	275.386	8.59095	12.013	5.4473	101.026	100.319	103.556	LOC104437870	17.9 kDa class II heat shock protein
Eucgr.D02631	0.536591	0.477701	0.821051	1.76877	1.54171	1.59872	1.63431	1.82759	1.4323	2.93121	2.39478	2.77812	LOC104442385	disease resistance protein RPM1
Eucgr.F02835	24.3986	20.342	24.2872	79.184	93.6894	89.5945	36.8259	26.918	21.9214	66.5934	61.4725	62.3582	LOC104449704	probable fructokinase-6, chloroplastic
Eucgr.E03465	135.54	187.207	147.488	54.5756	54.5701	41.2434	201.578	240.58	233.425	45.2668	43.1639	47.3417
Eucgr.H00280	0.345442	0.243139	0.658994	0.250513	0	0.290861	0.195572	0.272686	0	1.10512	1.32906	1.36011
Eucgr.J01808	0	0	0	0	0	0	0	0	0	0	0	0
Eucgr.H03676	0.683708	0.330634	0.871141	0.840792	0.657632	0	1.27114	1.14641	1.12107	0.535877	0.900545	0.609366
Eucgr.H01940	86.1492	91.2191	96.9003	60.6004	57.5273	46.7956	60.0249	52.723	56.3732	81.4106	82.5777	82.5077	LOC104457229	NASP-related protein sim3
Eucgr.G02067	71.4757	84.6213	78.3077	86.5336	101	97.5245	61.6725	63.276	60.9451	116.482	112.26	103.588	LOC104453628	protein BASIC PENTACYSTEINE2
Eucgr.A01794	23.1723	23.4615	30.9242	125.694	120.247	113.543	32.3787	26.0895	22.6793	140.817	135.643	133.355	LOC104440465	uncharacterized LOC104440465
Eucgr.D02277	0.503747	0.20114	0.333143	1.22067	0.886426	1.14451	0.430802	0.706548	0.302115	6.78526	5.4096	6.20192
Eucgr.L00544	9.36812	22.5056	10.4491	2.14677	2.14154	1.05483	17.5177	17.6065	17.282	8.04847	9.06672	6.37725	LOC104428589	uncharacterized protein C3orf26 homolog
Eucgr.G00623	0	0	0	0	0	0	0	0	0	0	0	0
Eucgr.F01852	22.913	25.8788	21.7818	5.83014	7.07404	5.52361	21.1875	23.4165	23.8008	10.865	9.5482	11.947	LOC104448980	low-temperature-induced cysteine proteinase
Eucgr.L01805	0	0.495365	0	0	0	0	0	0	0	0	0	0	LOC104429981	nitrogen regulatory protein P-II homolog
Eucgr.F03068	12.7891	16.2133	13.3281	23.8644	22.0044	16.2618	5.75753	13.4403	7.5558	8.612	7.39334	5.93426
Eucgr.H03225	0	0.200771	0	0.484967	0.635853	0.50177	0	0.460467	0	1.24798	0.796759	0.896985	LOC104414617	ADP-ribosylation factor 2-B
Eucgr.J03058	5.50026	14.6113	12.7815	1.47631	2.43763	1.61234	15.8618	14.4153	16.0302	1.83177	0.636262	1.47928	LOC104423173	pentatricopeptide repeat-containing protein At1g80150, mitochondrial
Eucgr.L00737	181.494	188.551	186.753	113.813	105.335	92.089	86.1391	98.8324	90.5708	106.975	108.25	115.181
Eucgr.G00777	32.3652	17.2208	26.4051	3.34642	7.17779	12.1531	17.3138	19.7581	14.6624	4.8566	4.27778	3.51809	LOC104452817	chlorophyll a-b binding protein CP24 10A, chloroplastic
Eucgr.K01105	400.097	374.731	421.287	340.631	296.092	230.381	314.748	342.876	309.346	286.488	296.802	300.085	LOC104424989	ketol-acid reductoisomerase, chloroplastic
Eucgr.B03140	0	0	0	0	0	0	0	0	0	0	0	0	LOC104435591	protein CRABS CLAW
Eucgr.B02491	86.8064	136.402	115.562	63.0643	61.0356	62.2902	99.5885	81.797	100.635	33.207	35.7592	37.282	LOC104432866	serine/threonine-protein kinase GRIK1
Eucgr.L01683	0	0	0	0	0	0	0	0	0	0	0	0
Eucgr.L02704	0	0	0	0.259494	0.517106	0	0	0	0	0	0	0
Eucgr.J01031	0	0	0	0	0	0	0	0	0	0	0	0	LOC104423533	SEC12-like protein 1
Eucgr.F00837	0	0	0	0	0	0	0	0	0	0	0	0
Eucgr.F00753	13.3151	23.4474	15.7227	49.779	44.9068	17.2358	34.402	36.3655	38.9947	90.6648	86.8733	78.6737	LOC104448225	uncharacterized LOC104448225
Eucgr.L02022	19.1509	18.3028	17.5954	12.1486	9.35059	9.75956	6.1545	4.18111	5.16274	1.29883	1.52187	1.30704	LOC104430228	calmodulin-binding protein 60 F
Eucgr.F02939	4.20878	5.30379	8.49778	2.31535	2.63806	2.09447	6.05952	4.68992	6.2937	2.36765	2.00631	1.79745
Eucgr.B03139	6.04644	6.55449	4.44937	1.99536	1.46844	0.122467	6.70637	5.2055	2.01029	0.478588	0.532355	0.735569	LOC104433367	protein BIG GRAIN 1-like E
Eucgr.A00696	0	0	0	0	0	0	0.146506	0	0	0	0	0.021531	LOC104453653	receptor like protein 30
Eucgr.J01311	0	0	0	0	0	0	0	0	0	0	0	0
Eucgr.E01215	3.1049	1.15004	2.30526	2.24811	1.3984	1.50857	0.697889	0.726362	0.574751	0.453571	0.655384	0.490019
Eucgr.L01476	0	0	0	0	0	0	0	0	0	0	0	0	LOC104429620	beta-hexosaminidase 1
Eucgr.I01405	8.12972	16.2389	9.863	1.83894	3.00976	1.55877	23.0125	15.813	13.1479	1.24103	1.42494	1.45228	LOC104418933	amino acid permease 4
Eucgr.C01805	6.94062	7.70526	5.41155	4.81576	3.42408	4.57638	8.32956	8.26914	6.77222	4.75344	3.24669	4.0216	LOC104437073	uncharacterized LOC104437073
Eucgr.G00980	4.3076	1.03103	2.82095	0.101579	0.198035	0.104865	0.604938	2.47843	0.758972	0.452788	0.191539	0.377848	LOC104455161	periaxin
Eucgr.H03320	2.96661	3.12739	2.64544	2.44429	1.93441	2.4116	2.51327	3.1415	3.09339	3.4114	3.08471	2.64684	LOC104414696	pentatricopeptide repeat-containing protein At5g66500, mitochondrial
Eucgr.K02871	143.425	107.639	133.313	92.7774	106.709	137.122	104.889	114.484	106.523	86.6574	90.3479	90.7048	LOC104426290	uncharacterized LOC104426290
Eucgr.C02104	1.86689	3.54418	2.83802	1.33627	4.67555	2.28889	7.32959	4.09052	4.98977	9.78254	9.91267	9.99059	LOC104437246	protein FAM32A
Eucgr.F00430	23.4427	21.0375	25.184	18.7308	20.6903	18.2113	23.6368	19.2952	18.1365	14.4248	15.1988	14.4028
Eucgr.E00954	0	0	0	0	0	0	0.136889	0.13949	0.030383	0.260514	0.060303	0
Eucgr.F02296	0	0.156363	0.242854	0	0.319296	0.425275	0.444222	0.829342	0.904344	0.922532	0.273532	0.487043	LOC104451070	probable carbohydrate esterase At4g34215
Eucgr.J02129	25.9572	22.0098	26.8262	239.513	190.595	161.254	83.0006	43.9308	34.4467	126.942	130.837	130.351	LOC104422550	plant cysteine oxidase 2
Eucgr.B00703	23.8423	30.5761	28.4918	18.6735	21.0471	19.8796	113.278	89.7406	123.36	16.0317	16.8847	16.9407	LOC104421513	uncharacterized LOC104421513
Eucgr.A02515	0	0	0	0	0	0	0	0	0	0	0	0
Eucgr.H02489	0	0	0	0	0	0	0	0	0	0	1.2654	0	LOC104414135	thylakoid lumenal 19 kDa protein, chloroplastic
Eucgr.C02673	0	0.511129	0.758612	1.03723	1.66751	0.121776	0	0	0	0	0	0	LOC104439814	putative heme-binding peroxidase
Eucgr.E02333	0	0	0.058358	0	0.547944	0.546166	0	0	0	0.783302	0.728803	0.159554
Eucgr.J01298	0.048213	0	0	1.14952	1.37576	0.377635	0.071864	0.048712	0.070291	0.137261	0	0
Eucgr.G02684	453.234	478.009	451.828	310.625	346.118	348.399	492.65	455.242	505.987	568.803	546.6	562.877	LOC104454089	ubiquitin-conjugating enzyme E2 variant 1D
Eucgr.B00752	0	0	0	0	0	0	0	0	0	0	0	0
Eucgr.G01958	5.38603	7.23796	6.92677	2.52886	2.93258	3.97537	4.8487	4.8469	3.93428	2.53749	2.52599	1.97686	LOC104453547	poly(A) polymerase I
Eucgr.D01196	38.0514	34.096	38.7702	27.9763	27.8602	35.6136	24.3469	27.5491	23.8318	12.38	15.4597	13.5191	LOC104441344	junctophilin-1
Eucgr.E00471	85.4377	75.5561	75.4533	32.6992	28.0544	34.0912	72.3622	89.96	84.5288	45.6283	45.3619	47.5718	LOC104443724	UDP-glucuronate 4-epimerase 3
Eucgr.B03544	45.6037	39.0028	45.1933	69.6747	68.225	83.4851	104.26	109.189	102.6	151.595	155.29	154.824	LOC104433717	uncharacterized LOC104433717
Eucgr.B02544	15.7508	20.2765	15.4216	16.0088	14.3751	13.9531	18.9604	17.9228	19.4829	18.245	19.278	20.5715	LOC104432909	WAT1-related protein At5g40240
Eucgr.C02493	10.6025	13.3791	13.7991	11.1247	10.3929	8.11266	9.27255	9.34746	11.443	3.05108	3.3509	3.59235	LOC104437486	uncharacterized LOC104437486
Eucgr.H05117	10.2768	10.2988	13.2452	21.8134	19.3624	16.7337	17.883	13.7547	18.2649	17.6569	15.714	15.9788	LOC104415997	ultraviolet-B receptor UVR8
Eucgr.H00585	0	0	0	0	0	0	0	0	0	0	0	0
Eucgr.K03155	20.6786	16.8674	22.3177	35.1511	30.3769	16.846	22.68	22.5293	24.0139	27.7384	27.38	26.9743	LOC104426484	UNC93-like protein 3
Eucgr.J01240	14.7564	18.8924	20.1459	11.6746	13.9348	15.2588	8.77578	6.61647	9.01241	3.38533	3.8858	3.0086	LOC104423587	uncharacterized LOC104423587
Eucgr.E01064	0.432711	0.583564	0.103625	0.44917	0.276825	0.390226	0.499073	0.255118	1.00659	5.6973	4.86514	5.73687	LOC104444115	alcohol dehydrogenase-like 4
Eucgr.J02285	0	0	0	0	0	0	0	0	0	0	0	0	LOC108955701	putative disease resistance protein At1g50180
Eucgr.A00447	0.258048	0.878834	0.964886	0.571696	0.601636	0.155825	1.34861	1.84986	2.77842	1.34238	1.03393	0.434854
Eucgr.L02426	0	0	0	0	0	0	0	0	0	0	0	0
Eucgr.D01404	0	0	0	0	0	0	0	0	0	0	0	0	LOC104441463	rho GDP-dissociation inhibitor 1-like
Eucgr.I00634	0	0	0	0	0	0	0	0	0	0.106235	0	0
Eucgr.E01243	35.378	40.6783	43.7684	27.0357	28.8327	31.8716	29.1495	26.4814	28.1456	21.3912	20.5079	19.1931
Eucgr.G03247	0	0	0	0	0	0	0	0	0	0	0	0	LOC104455944	CSC1-like protein At3g54510
Eucgr.H03041	4.11436	2.52295	2.71896	2.10859	2.26442	1.4672	4.21292	3.41835	3.72958	2.10916	1.75404	1.53271	LOC104414485	protein tas
Eucgr.D01938	41.4186	51.4374	50.0873	57.3886	67.4939	74.5194	56.5448	53.4792	57.9728	61.9295	60.2604	62.6961
Eucgr.K00096	10.3995	8.4106	8.85704	12.2797	10.1578	7.22031	8.39303	6.84892	6.56333	12.3005	13.0944	15.0883	LOC104424291	uncharacterized LOC104424291
Eucgr.I02568	21.2587	20.601	22.8943	40.6788	36.4215	24.2623	11.7147	11.5536	13.0645	15.8969	17.4563	17.2349	LOC104419842	fatty acid amide hydrolase
Eucgr.I02088	16.5663	17.9711	17.7994	4.76591	6.83168	6.78189	13.1806	12.7296	12.3442	9.40958	8.08618	9.70544	LOC104419466	E3 ubiquitin-protein ligase Praja-1
Eucgr.B01413	0	0	0	0	0	0	0	0	0	0.133753	0	0
Eucgr.J00325	0	0	0	0.043474	0	0	0	0	0	0	0.079245	0	LOC104423365	alpha-galactosidase 1
Eucgr.H02336	7.78981	17.0069	12.6161	5.1582	4.91988	3.48252	9.04364	6.7852	7.85316	2.82911	2.63118	1.86387	LOC104414041	GTP-binding protein At3g49725, chloroplastic
Eucgr.C02376	0.244469	0.141892	0	0.341978	0.3396	0.118338	1.40738	0.989983	0.867942	1.44036	1.05891	0.914253	LOC104437417	vinorine synthase
Eucgr.J03142	0	0	0	0.550987	0.261947	0.553174	0	0	0	0.557	1.6285	0.193594	LOC104423252	uncharacterized LOC104423252
Eucgr.K02829	53.3314	62.4977	60.3391	7.018	9.14893	7.36734	27.4989	34.458	31.3052	6.62305	6.18348	5.00492	LOC104426254	U3 small nucleolar ribonucleoprotein protein MPP10
Eucgr.E02441	0.872736	1.56525	1.21765	0.814105	1.55259	1.15691	2.34312	1.19767	1.71484	0.166357	0.229462	0.320299	LOC104446756	cysteine-rich receptor-like protein kinase 8
Eucgr.E01934	0	0	0	0	0	0	0	0	0	0	0	0
Eucgr.A01463	28.6154	32.1591	30.8505	24.6439	25.2823	22.7942	22.2089	22.1607	22.7009	23.2138	23.2894	21.5438
Eucgr.C03041	4.65709	10.0724	6.05604	1.46233	1.08661	1.98572	4.7666	3.92245	4.15846	0.446328	0.488511	0.769331	LOC104437841	calcineurin B-like protein 10
Eucgr.J01089	5.16122	4.40911	5.10272	0.219166	0	0.10338	4.37309	4.38321	3.16075	0.567823	0.197154	0	LOC104421794	patatin-like protein 6
Eucgr.A02088	52.7938	63.2627	54.3638	46.6634	99.8843	175.345	104.194	107.24	66.0938	243.378	229.605	239.158	LOC104442820	short-chain type dehydrogenase/reductase
Eucgr.H00130	16.5196	16.818	18.3176	5.07503	3.97581	2.25211	11.8361	13.5969	11.4069	8.43673	7.18211	8.03587	LOC104456079	cysteine-rich repeat secretory protein 3
Eucgr.J02713	0	0	0	0	0	0	0	0	0	0	0	0
Eucgr.B01183	0	0	0	0	0	0	0	0	0	0	0	0
Eucgr.K03370	42.7548	19.5029	35.4265	76.376	80.0975	156.429	31.0827	34.4378	26.0576	33.9747	33.74	33.8424	LOC104426665	protein MARD1
Eucgr.B00851	2.29016	2.22497	3.06248	0	0	0	1.08271	0.86955	1.33818	0.38219	0.560196	0.499001	LOC104421990	uncharacterized LOC104421990
Eucgr.J01183	167.145	146.039	140.099	9.35947	13.1883	14.8503	171.01	272.258	317.402	3.11605	3.75909	3.78995	LOC104421869	protein NRT1/ PTR FAMILY 5.4
Eucgr.K03480	0.887389	1.5451	0.863092	1.4084	0.995265	1.07917	0.44017	0.65885	1.12477	0	0.130575	0
Eucgr.J03156	0	0	0	0.018835	0	0	0	0	0	0	0	0	LOC104424207	UDP-glycosyltransferase 90A1
Eucgr.A02181	14.8299	11.8745	11.705	10.2245	7.11093	9.20197	10.9407	12.275	15.5393	16.4633	16.1663	15.6763	LOC104443677	50S ribosomal protein 5, chloroplastic
Eucgr.H03226	2.62633	3.71448	3.97753	1.83176	0.850674	0.907245	1.24103	0.330798	0.237568	0	0	0	LOC104414619	putative ribosome biogenesis protein slx9-like
Eucgr.B03793	0	0.335709	0.289741	0	0.25799	0.035463	0.10364	0.299153	0.200831	0	0	0
Eucgr.H00547	0	0	0	0	0	0	0	0	0	0	0	0
Eucgr.L00729	0	0	0	0	0	0	0	0	0	0	0	0	LOC104428794	UPF0481 protein At3g47200
Eucgr.J02295	19.0735	10.9889	17.5348	24.8099	20.0414	19.7899	15.5602	16.8816	15.6026	14.3947	13.7827	14.1412	LOC104422678	hypothetical protein
Eucgr.G01875	204.836	147.794	186.667	137.582	148.519	168.517	115.092	121.666	109.24	90.5964	89.1019	89.4765	LOC104453488	epidermal growth factor receptor substrate 15-like 1
Eucgr.H00383	4.42797	4.34357	5.88156	4.82838	4.45432	4.63528	6.93776	5.83779	5.89668	10.3764	10.06	11.132	LOC104456253	diphthine methyltransferase homolog
Eucgr.D02288	0.468215	0.544882	1.09917	0	0	0	1.63527	0.269997	0.988032	1.11283	0.889378	1.17689	LOC104442097	gibberellin 20 oxidase 1
Eucgr.L02505	1.07445	0.073932	0.301665	5.91709	6.64164	21.2936	8.41685	9.95935	8.64629	14.4581	14.7795	16.0914	LOC104430755	pathogenesis-related protein 1
Eucgr.K01643	56.5663	91.2895	68.7801	75.7721	83.9562	93.082	112.019	91.1335	91.165	44.419	47.7975	47.1687	LOC104425372	transcription factor TGA2.3
Eucgr.H00159	41.6026	29.0478	36.7167	35.7595	36.38	28.5823	19.8628	19.919	17.2393	26.0199	28.1782	27.247	LOC104456099	cryptochrome-1
Eucgr.H01472	0	0	0	0	0	0	0	0	0	0.565963	0.502516	0.605266	LOC104456994	ent-copalyl diphosphate synthase, chloroplastic
Eucgr.H00916	147.341	161.076	157.08	50.459	42.7883	38.1084	106.617	113.45	105.781	34.3437	35.6729	33.7484	LOC104456629	probable pre-mRNA-splicing factor ATP-dependent RNA helicase DEAH2
Eucgr.G00957	26.8782	31.5037	25.7511	48.7956	34.4855	22.2017	38.6091	32.0581	35.0935	63.6158	71.4942	66.8458	LOC104452900	prefoldin subunit 1
Eucgr.C00769	60.8421	42.4242	92.5958	1772.71	1626.62	1120	234.808	122.796	74.2848	851.408	855.515	855.065	LOC104436385	sucrose synthase
Eucgr.C02212	2.85785	2.18705	3.60587	1.53667	0.713636	0.19328	0.173439	0.562542	0.550613	0.911593	0.480528	0.455848	LOC104437328	peroxidase 16
Eucgr.K03243	116.137	196.413	146.519	52.4406	51.8752	51.976	158.352	151.416	192.332	104.225	107.01	115.276	LOC104426555	V-type proton ATPase subunit G1
Eucgr.K02104	0	0	0	0	0	0	0.121228	0	0.308082	0	0	0
Eucgr.C00805	1.66721	3.20717	1.35408	10.6716	15.4658	16.8245	1.03503	2.67006	2.52721	4.91445	3.87708	3.89855	LOC104436414	thiol protease aleurain
Eucgr.F03778	16.0103	16.7965	13.2468	0	0	0.172093	6.43646	10.8519	6.65348	0.064104	0.119607	0.128984	LOC104450494	WAT1-related protein At4g08300
Eucgr.F03451	0.064531	0	0	0.524684	0.706091	0.503466	0.181249	0.097799	0	0.288292	0.796985	0.464981	LOC104452109	hypothetical protein
Eucgr.G01624	8.18978	8.67907	9.33141	10.0659	10.4179	5.04786	14.5649	10.987	11.0203	12.6861	12.7085	12.5285	LOC104453306	bifunctional dihydrofolate reductase-thymidylate synthase
Eucgr.C00891	2.43557	4.85902	3.51931	3.1048	3.93548	3.71474	7.53144	7.68592	8.87227	0.674416	0.882264	0.4988
Eucgr.K01505	0	0	0	0	0	0	0	0	0	0	0	0
Eucgr.H01115	37.955	50.6408	33.5109	24.2468	16.3722	18.0739	28.3192	27.5029	27.7953	37.6902	45.8729	42.0986	LOC104456758	mitochondrial zinc maintenance protein 1, mitochondrial
Eucgr.J02816	0	0.077687	0	0	0	0	0	0.107844	0.137763	0	0.663304	0.792126	LOC104424126	transcription factor WER
Eucgr.A02836	2.21905	3.58358	3.29236	2.55971	3.07635	1.54527	3.04488	2.86703	3.53905	1.24705	1.52944	0.931312	LOC104449215	ABC transporter B family member 28
Eucgr.L01371	0	0	0	0	0	0	0	0	0	0	0	0	LOC104429489	polygalacturonase
Eucgr.K02802	155.368	97.8043	128.95	201.873	166.199	167.209	224.049	239.927	232.9	122.718	108.695	113.972	LOC104426229	uncharacterized LOC104426229
Eucgr.E03286	0	0	0	0	0	0	0	0	0	0	0	0
Eucgr.A01969	26.1325	28.4462	29.014	15.3434	15.6353	10.129	32.5526	40.349	33.7681	15.8648	12.0748	15.2499	LOC104441782	peroxisomal and mitochondrial division factor 2
Eucgr.C03507	0	0	0	0	0	0	0	0	0	0	0	0
Eucgr.D01276	0	0	0	0	0	0	0	0	0	0	0	0	LOC104442896	protein ACCELERATED CELL DEATH 6
Eucgr.C01895	7.97883	9.13313	8.79775	27.6388	23.1146	15.1537	14.7679	13.2707	13.9056	35.3752	37.3248	36.8952	LOC104437105	probable protein phosphatase 2C 60
Eucgr.E00812	0.175107	0.397417	0.565281	1.70852	0.920069	0.740912	3.28891	3.9337	4.7571	0.604804	0.849277	0.239905	LOC104443946	dirigent protein 5
Eucgr.K02842	4.01407	3.69614	5.18654	4.5137	4.90645	4.71244	7.27064	4.74392	4.99687	4.42442	4.95675	4.62116	LOC104426267	serine/threonine-protein kinase ATM
Eucgr.K01799	0	0	0	0	0	0	0	0	0	0	0	0	LOC104427509	ABC transporter G family member 15-like
Eucgr.K02338	4.81135	9.82479	8.12479	5.81464	14.0393	18.6457	3.5603	3.40004	3.10806	1.22994	0.778959	1.14396	LOC104425891	DEAD-box ATP-dependent RNA helicase 41
Eucgr.G02012	0.126648	0.244807	0.270985	0.997812	0.942139	0.673724	0.383033	0.631236	0.349141	0.241995	1.17284	1.34674	LOC104453584	gibberellin 2-beta-dioxygenase 8
Eucgr.F03564	0.521249	1.43312	0.97932	3.28096	2.8483	3.03828	2.69758	2.10796	2.2941	2.99265	2.18979	2.21591
Eucgr.H04846	0	0	0	0	0	0	0	0	0	0	0	0	LOC104417813	uncharacterized LOC104417813
Eucgr.G02486	114.491	74.6793	96.3734	476.713	589.284	471.214	112.054	124.28	111.92	798.395	752.204	766.245	LOC104453934	NAC transcription factor 29
Eucgr.K03514	26.3221	31.9524	29.289	26.6614	30.9812	22.0368	24.2462	23.1639	28.1474	24.7737	26.4426	24.1678	LOC104426789	uncharacterized LOC104426789
Eucgr.K00127	6.37624	4.41409	6.0124	25.9232	1.17964	8.3594	9.3163	6.71995	5.49273	0.757866	14.8619	13.3882
Eucgr.G02326	30.6391	32.4635	30.5315	12.329	17.1409	15.1795	38.1756	35.637	38.8423	23.3304	23.4459	23.0397	LOC104453801	ethylene-responsive transcription factor ERF118
Eucgr.J02270	2.87503	3.26192	3.36371	6.03619	3.23428	2.37029	2.69274	2.62444	2.43278	5.50053	4.97624	6.01459
Eucgr.K00417	0.138687	0.483097	0.308076	0.174596	0.698081	1.40742	0.567203	1.14044	0.302955	0.231377	0.538787	1.12202
Eucgr.L02744	5.57665	4.87766	5.96876	38.7002	38.1892	35.7394	15.6844	13.0574	14.1617	47.1883	47.1286	46.094
Eucgr.C03191	10.1859	10.5537	9.37256	12.0537	10.669	11.7241	7.75135	8.94784	7.09264	6.98852	7.06271	8.73465	LOC104437955	uncharacterized LOC104437955
Eucgr.E04048	0.076849	0	0	0	0	0	0	0.82063	0.701023	0.717226	0.666816	0.78625
Eucgr.F01618	119.334	128.527	124.057	50.1919	46.9033	64.5545	88.5071	98.6188	95.7474	42.7049	38.2209	38.4898	LOC104448804	SH3 domain-containing protein 2
Eucgr.K00007	2.00301	1.12785	1.50584	0.863991	0.537695	0.825776	0.822483	0.726413	0.425598	0.543023	0.144708	0.295514	LOC104426898	phospholipase A(1) LCAT3
Eucgr.A01265	21.4784	30.7313	22.4005	7.40928	5.56706	1.80247	10.9845	9.88709	14.1454	6.6614	7.1245	6.78515	LOC104436554	mitochondrial import inner membrane translocase subunit Tim9
Eucgr.I01532	1.98462	1.99992	2.63679	0.519691	0.38284	0.201228	2.47343	2.08752	1.28239	0.556949	0.670114	0.531339	LOC104419046	glutamate receptor 3.2
Eucgr.C00083	213.249	142.756	148.138	193.472	173.912	149.571	70.69	86.8294	80.1998	163.106	158.952	153.119	LOC104435906	oligosaccharyltransferase complex subunit OSTC
Eucgr.D01801	0	0	0	0	0	0	0	0	0	0	0	0	LOC104443114	uncharacterized LOC104443114
Eucgr.L03713	0	0	0	0	0	0	0	0	0	0	0	0
Eucgr.C02076	0.808455	1.30024	0	0	0	1.85886	0	1.15136	1.21928	0.2607	0	0	LOC104439530	transcription factor bHLH121-like
Eucgr.E03075	0.255928	0.664827	0.387467	0.766027	0.617814	0.384509	0	0	0	0	0	0
Eucgr.C04420	0.711575	0.561268	0.3284	0.154482	0.363185	0	5.9386	4.28686	5.04042	3.74961	3.00337	4.03771
Eucgr.I02268	0	0	0	0	0.284243	0.370107	26.5601	26.5452	27.5492	1.52058	1.54773	0.965303	LOC104419593	probable acyl-activating enzyme 1, peroxisomal
Eucgr.E03235	0.119055	0.372384	0.432569	0	0	0	0	0.360637	0.076448	0	0	0	LOC104447180	UDP-glycosyltransferase 13
Eucgr.J02771	0	0	0	0	0	0	0	0	0	0	0	0
Eucgr.B00921	0	0	0	0	0	0	0	0	0	0	0	0
Eucgr.F00366	260.485	321.72	278.817	178.076	141.357	111.589	188.505	226.997	223.609	112.726	108.912	113.582	LOC104447979	phospho-2-dehydro-3-deoxyheptonate aldolase 2, chloroplastic
Eucgr.E02060	0.258702	0.490049	0.35334	0.223967	0.366592	0.102405	0.842667	0.321698	0.38893	0.561393	0.522968	1.0288
Eucgr.J02205	39.9172	49.1202	40.2899	15.6202	24.8495	13.7087	71.7924	76.68	105.76	44.1563	43.4514	46.3402	LOC104422602	deoxynucleoside triphosphate triphosphohydrolase SAMHD1 homolog
Eucgr.C04020	5.10096	13.6177	8.99062	0.397346	0	0	12.353	20.93	8.14982	0.583599	0.422069	0.659639
Eucgr.H01726	0.515935	0.182584	0.329412	2.06939	3.18376	2.24805	0.041086	0.085341	0	0.063871	0.057471	0.049534
Eucgr.C02470	0	0	0	0	0	0	0	0	0	0	0	0	LOC104439696	TMV resistance protein N
Eucgr.K00153	3.50189	3.07794	3.07373	1.51581	1.53184	0	9.4315	13.089	8.32685	0.319378	0.692321	0.530335	LOC104424339	protein ODORANT1
Eucgr.G00141	0	0	0	0	0	0	0	0	0	0	0	0
Eucgr.I00216	0	0.377561	0.280185	0.305363	0.606483	0.638143	0.310628	0	0.434254	0	0	0.252792	LOC104418133	chitinase 2-like
Eucgr.F03048	8.7179	4.70332	9.99012	0.072112	0.17771	0	3.0644	4.53673	3.10771	0.270973	0	0.389026	LOC104449894	protein NRT1/ PTR FAMILY 1.2
Eucgr.H04358	0.292136	0.23962	0.23032	0.14393	0.198769	0.129369	0.150084	0.277052	0.296648	0.14672	0.224739	0.340757	LOC104417663	calcium-transporting ATPase 12, plasma membrane-type
Eucgr.B02118	250.298	254.748	355.081	80.3758	68.0696	52.1063	253.297	230.911	240.125	104.087	111.483	107.377	LOC104432512	GDP-mannose 3,5-epimerase 2
Eucgr.H00953	49.4943	45.8262	43.2267	14.3384	14.1832	11.6872	27.4026	23.4436	25.793	10.3019	11.6649	12.8978	LOC104456645	prostaglandin E synthase 2
Eucgr.A02915	82.6927	75.6233	83.7672	27.0454	28.2976	39.842	76.8377	81.3118	77.4244	16.4343	17.1904	16.8862	LOC104449913	U-box domain-containing protein 35
Eucgr.D02351	93.8223	67.2382	82.3618	98.9879	113.303	101.233	121.808	206.904	183.064	61.9134	58.4724	60.9805	LOC104442159	hydroquinone glucosyltransferase
Eucgr.H04859	0.901254	1.99663	1.00563	0.732136	0.680438	0.238207	0.676276	0.29243	0.254635	0.076978	0	0.114372	LOC104415832	programmed cell death protein 2-like
Eucgr.F02022	0	0	0	0	0	0.063009	0.19734	0	0	0.022149	0.069688	0	LOC104449097	probable LRR receptor-like serine/threonine-protein kinase At4g26540
Eucgr.L00700	0	0	0	0.044028	0	0	0.030813	0	0.086048	0	0	0	LOC104428757	TMV resistance protein N
Eucgr.A02392	40.225	56.0668	43.0629	22.9192	21.6807	22.9281	24.1086	17.1096	23.9308	21.904	26.1756	23.9402	LOC104445336	uncharacterized LOC104445336
Eucgr.H04548	81.1738	94.8211	73.444	30.0324	29.6346	35.9668	44.9165	52.5207	58.5897	55.9619	52.6746	55.4067	LOC104415614	uncharacterized LOC104415614
Eucgr.I01563	0	0	0	1.44639	0.609791	0	0	0.156685	0	1.96634	1.99436	2.49641	LOC108955196	MATH and LRR domain-containing protein PFE0570w-like
Eucgr.B00712	2.33708	3.67978	2.56879	3.84675	1.85718	1.73642	1.38782	1.05865	0.882107	4.53229	3.43597	3.90262	LOC104434401	cytochrome P450 CYP736A12
Eucgr.F02424	0	0	0	0	0	0	0	0	0	0	0	0
Eucgr.H04117	0	0	0	0.293884	0.290735	0	0	0	0	0	0.105619	0
Eucgr.D01751	9.54958	9.01963	7.27355	4.74583	1.99688	1.29382	4.13023	4.84008	4.5126	2.11995	2.75107	3.07251	LOC104441664	uncharacterized LOC104441664
Eucgr.G00941	0	0	0	0	0	0.07507	0	0	0	0.259332	0.185045	0.333866
Eucgr.I00083	0.407103	0.230802	0	0	0.382924	0.518498	0	0	0	0	0	0	LOC104420087	TMV resistance protein N
Eucgr.G03255	14.5334	6.05722	14.0172	4.95388	4.00524	2.98828	7.04341	6.27155	6.03966	13.6938	17.4551	14.1394	LOC104454559	xanthoxin dehydrogenase
Eucgr.L00816	5.71716	4.27624	5.54481	6.35172	4.94261	3.46721	6.26363	7.68722	9.78594	8.68248	8.33921	7.7919	LOC104428890	GDSL esterase/lipase At1g28570
Eucgr.B03837	12.9221	16.071	14.4698	8.22911	8.15413	7.27312	17.1829	17.2362	16.9303	5.45222	5.38975	5.80202
Eucgr.F01954	5.75828	6.34832	5.93735	3.87347	5.09134	2.75778	7.70472	8.88948	7.01799	3.9747	2.75913	3.64186	LOC104449045	pentatricopeptide repeat-containing protein At1g06270
Eucgr.L02458	4.34065	3.89203	5.02008	81.6667	59.5031	67.3281	8.46888	5.75653	4.41702	40.6591	42.2163	42.9176
Eucgr.A01863	0	0	0	0	0	0	0	0	0	0.224559	0	0	LOC104441017	trans-resveratrol di-O-methyltransferase
Eucgr.F00365	1621.95	1460.41	1214.82	739.48	740.487	577.874	826.019	963.958	955.779	1003.8	917.985	956.244	LOC104447978	protein EXORDIUM-like 2
Eucgr.L02901	0.3404	0.534524	0	0	0	0	0	0	0	0	1.13603	0.260342
Eucgr.E03648	0	0	0	0	0	0	0	0	0	0	0	0
Eucgr.K03322	0.686942	0.294637	0.944171	0.541588	0.301661	0.25996	0.933126	0.753407	0.87591	0.862636	1.04557	0.841231	LOC104426630	pentatricopeptide repeat-containing protein At3g63370, chloroplastic
Eucgr.H03857	0.480334	1.00599	0.114649	0.016387	1.41643	0.544985	1.08721	1.15583	1.28437	1.58302	1.52037	1.68981
Eucgr.G03064	0	0	0	0	0	0.15455	0	0.248031	0	0	0.555366	0.250403
Eucgr.I01584	0	0	0	0	0	0	0	0	0	0	0	0
Eucgr.K03593	0	0	0	0	0	0	1.08473	0.69297	1.41727	1.29562	1.82495	1.67315
Eucgr.F01663	23.2955	29.0795	18.1619	20.5043	15.9045	7.32369	10.7118	16.939	12.0407	19.726	19.2012	20.8525	TUB3	tubulin beta chain
Eucgr.F01071	0.880826	0	12.3674	34.065	22.377	7.72192	76.3136	32.6508	25.214	67.1591	58.1819	68.5189
Eucgr.L01506	8.43807	10.8145	13.3904	16.5456	15.9459	12.1005	6.27529	4.87563	5.88823	7.2125	6.68222	7.54319	LOC104429651	F-box/LRR-repeat protein At5g63520
Eucgr.B02865	71.3601	67.8658	71.4193	27.8635	31.6464	38.8213	42.4953	39.325	46.4724	13.8066	15.3079	14.8996	LOC104433168	CDP-diacylglycerol--serine O-phosphatidyltransferase 1
Eucgr.B03787	5.25048	4.45945	7.24085	2.0699	2.20399	1.97559	2.23826	3.28152	1.86902	1.44065	0.72159	1.76827
Eucgr.C00774	2.0092	0.415285	1.46092	3.28342	3.72152	2.056	1.871	2.5722	2.39917	3.51883	2.98602	4.19584	LOC104436389	peroxiredoxin Q, chloroplastic
Eucgr.C03273	0	0	0	0	0	0	0	0	0	0	0	0
Eucgr.H01200	1.30709	0.402193	0.630962	4.47541	2.79149	2.24762	5.66882	5.33898	4.25582	3.52815	3.22769	2.85222	LOC104456822	monothiol glutaredoxin-S1
Eucgr.K03465	25.2436	28.2737	24.4971	2.90415	5.46659	5.33528	14.3365	13.8767	13.5326	2.3287	3.04983	2.73841	LOC104426748	stress-related protein
Eucgr.E03415	0	0	0	0	0	0	0	0	0	0	0	0
Eucgr.K03479	97.2521	135.119	118.109	21.2836	18.3952	14.3772	80.482	99.3643	80.0397	26.0643	27.7546	29.9656	LOC104426765	peter Pan-like protein
Eucgr.K02914	63.1804	45.7252	65.0494	75.8036	80.9814	76.4147	80.3896	70.319	73.6288	56.5664	55.7914	55.0521	LOC104426329	calcium-dependent protein kinase 10
Eucgr.C00098	0	1.28741	2.19932	1.6801	5.51974	14.4466	13.363	8.98685	13.3685	6.98223	7.72461	8.03684
Eucgr.E01296	2.70826	3.52185	2.877	86.2559	93.5635	99.5513	3.36171	3.78222	4.18188	34.2518	32.0444	34.0533	LOC104444268	disease resistance protein RPM1
Eucgr.K00106	0.288434	0.262289	0.237802	0	0	0	0.626679	0.090435	0.043451	0	0.03865	0	LOC104424299	TPR repeat-containing protein ZIP4
Eucgr.I01325	0.557483	1.07696	0.247325	1.13947	0.684406	0.277723	0.065555	0.726813	0.574086	0.217729	0.115129	0.125942	LOC104418878	endoglucanase 24
Eucgr.H02144	0	0	0	0.715972	0.88558	0	18.9623	15.3535	14.5032	19.0134	17.9775	17.6339
Eucgr.H00352	0	0	0	0	0	0	0	0	0	0	0	0	LOC104416159	caffeic acid 3-O-methyltransferase
Eucgr.L02922	0	0	0	0	0	0	0	0	0	0	0	0
Eucgr.C02251	0	0	0	0	0	0	0	0.09302	0	0	0	0	LOC104439588	exopolygalacturonase
Eucgr.D01353	1.97124	3.18653	2.66142	0.192986	0.094861	0.03359	3.62138	3.00508	3.03868	1.09009	1.19867	1.17744	LOC104441423	uncharacterized LOC104441423
Eucgr.L00977	3.03654	3.86561	2.25214	0.123229	0.600954	0.276407	3.41052	3.86598	4.27746	1.3118	1.27148	1.73643
Eucgr.E01291	0	0	0	0	0.045355	0	0	0	0	0.044489	0	0	LOC104444264	disease resistance protein RPM1
Eucgr.D02119	295.715	430.776	305.605	246.725	202.47	185.115	210.96	338.433	270.196	291.034	214.988	295.096	LOC104441953	GTP-binding protein YPTM2
Eucgr.E00877	0	0	0	0	0	0	0.224213	0	0	0.03368	0	0
Eucgr.F03041	57.2222	63.3144	70.8721	18.0852	19.5198	17.3894	57.7804	57.5388	57.0942	29.8639	30.6661	32.0134	LOC104449890	golgin candidate 5
Eucgr.G00098	0	0	0	0	0	0	0	0	0	0	0	0
Eucgr.E04226	0	0.041115	0	0	0	0	0.147625	0	0.056327	0	0	0	LOC104445777	probable galactinol--sucrose galactosyltransferase 2
Eucgr.B01597	32.476	45.4926	31.9315	37.5998	29.3709	32.0445	37.9939	32.9809	41.4142	62.1252	62.5012	63.3542	LOC104428535	uncharacterized LOC104428535
Eucgr.C02429	19.3906	29.4177	22.561	0.257078	0	0.531968	8.24326	11.9357	4.28741	0.825768	0.048692	0.488204	LOC104437451	protein GLUTAMINE DUMPER 5
Eucgr.H02510	29.3647	31.0922	31.5888	32.2538	25.9984	33.7314	39.5809	33.0503	29.482	26.3227	22.0538	21.9157
Eucgr.K01028	39.8157	22.149	39.0107	29.0659	27.1688	24.9204	26.5458	26.5283	25.1574	19.5512	21.0539	20.2622
Eucgr.G03178	56.0431	47.7577	58.2021	73.8196	66.2932	78.6844	62.3632	52.3747	56.76	73.2742	56.5762	73.0736	LOC104454492	uncharacterized LOC104454492
Eucgr.L01465	62.9948	72.9282	59.4222	103.896	100.802	98.5983	72.5828	76.793	85.6886	119.123	117.927	118.675	LOC104429609	mitochondrial pyruvate carrier 4
Eucgr.E03047	0	0	0	0	0	0	0.105613	0.455323	0	0.529178	0	0
Eucgr.H02247	0	0	0	0	0	0	0	0	0	0	0	0	LOC104416875	isoflavone 3'-hydroxylase
Eucgr.B02136	0	0	0	0	0	0	0	0	0	0	0	0
Eucgr.E02961	0.339635	0.497368	0.274664	0	0	0	0.849254	0.404592	0.3782	0	0	0
Eucgr.E03969	0	0	0	0	0	0	0	0	0	0	0	0	LOC104445664	F-box protein CPR30
Eucgr.D01438	0	0.457307	0.113896	0	0	0	0.821782	0.479661	1.86979	0	0	0.226836
Eucgr.A00080	5.92437	5.92039	6.96235	18.2511	13.5707	13.02	3.14098	3.55737	3.43221	13.4177	14.1436	14.261
Eucgr.H01035	0.434774	0.284249	0.301135	0.395037	0.451723	0.553779	1.08624	0.909593	0.778339	0.650156	0.66944	0.720697	LOC104416399	putative disease resistance RPP13-like protein 1
Eucgr.H00823	38.1602	34.6896	43.1789	40.3201	38.9075	24.382	28.2704	25.682	23.1432	35.2667	34.9947	35.3399	LOC104456562	CLIP-associated protein
Eucgr.L00159	0.194136	0.186913	0.059256	8.07991	5.05613	3.25339	0.055285	0	0	3.56516	5.52774	4.95294	LOC104428148	oligopeptide transporter 3
Eucgr.C02727	35.6778	23.6975	29.8891	14.6815	13.0638	14.0251	51.6091	44.6148	42.6229	14.4615	13.8694	13.2971	LOC104437634	homeobox protein knotted-1-like 3
Eucgr.I00568	18.2271	36.8888	19.5548	2.52185	3.95629	4.0965	24.2573	17.3074	23.6248	8.90569	6.46927	7.01347	LOC104418342	uncharacterized LOC104418342
Eucgr.G02945	0.968879	0	0.827218	7.13133	5.73797	6.84814	1.23881	0.454324	0.211537	5.53124	5.9989	5.86941
Eucgr.J03187	0	0	0	0	0	0	0	0	0	0	0	0	LOC104424218	vacuolar-processing enzyme
Eucgr.G03203	1.96086	2.1716	2.79291	2.28502	3.27477	2.45701	2.5453	2.48361	2.24699	1.47638	1.5246	1.4912
Eucgr.H00060	23.2241	8.72705	15.4776	21.7331	14.0434	21.6568	10.6309	9.76091	7.9981	24.5351	26.0092	26.0682	LOC104456032	L-type lectin-domain containing receptor kinase IX.1
Eucgr.J00314	30.7168	34.5925	32.6574	14.3681	11.8282	12.9955	21.4367	22.5186	21.557	9.59841	9.28043	8.17109	LOC104421175	uncharacterized LOC104421175
Eucgr.H01187	0	0	0	0.061913	0.061278	0.128047	0.116777	0	0	6.00622	7.03063	7.25659	LOC104456811	potassium transporter 5
Eucgr.I02411	2.77327	2.66805	3.04159	0.879682	2.21876	0.851864	3.0322	2.53852	2.47509	1.19495	1.50859	2.15837	LOC104419715	putative pentatricopeptide repeat-containing protein At3g47840
Eucgr.L03039	1.3134	0.4578	2.47342	470.413	346.279	158.403	23.2153	9.01124	4.41176	198.669	223.747	211.3
Eucgr.I02699	0.061754	0.118971	0.262507	0.874077	0.62589	1.10878	0.799052	0.729167	0.472846	9.1075	11.4056	13.1344	LOC104419937	vacuolar iron transporter homolog 4
Eucgr.G01657	0	0	0	0	0	0	0	0	0	0	0	0	LOC104455469	subtilisin-like protease SBT1.8
Eucgr.K00479	8.82143	13.9566	11.0078	3.97279	3.60857	5.7541	12.91	9.7995	9.48207	10.4118	10.2858	11.3384
Eucgr.F01545	0	0	0	0	0	0	0	0	0	0	0	0
Eucgr.A01729	1.83278	0.466337	1.89397	57.0936	51.8357	48.0316	1.95157	1.00147	2.08113	26.6233	26.169	24.577	LOC104439852	cysteine-rich repeat secretory protein 38
Eucgr.L01620	0	0.120854	0	0	0.116687	0	11.4345	9.91431	10.0471	3.94068	3.45887	3.29396	LOC104429771	uncharacterized LOC104429771
Eucgr.J00757	1.0785	1.46326	0.827936	0.612801	1.00086	0.681764	4.77581	4.00711	4.33978	2.26021	2.32705	2.57815
Eucgr.K00058	0	0	0	0	0.374656	0	0.122645	0.326524	0	0	0	0	LOC104426926	protein ACCELERATED CELL DEATH 6
Eucgr.H03378	1.65132	1.21786	2.0084	2.00207	5.303	4.71497	13.2908	13.721	10.8427	43.9506	48.5146	47.3851	LOC104414730	F-box protein SKIP22
Eucgr.E01182	0	0	0	0	0	0	0	0	0	0.24074	0	0.127123
Eucgr.J00913	0	0	0	0.507287	0.301496	0.218555	0.380358	0	0.470479	0.113533	0	0	LOC104421649	protein CNGC15b
Eucgr.E02033	0.892684	0.810264	0.680869	1.25838	0.329738	0.924462	0.223683	0.145457	0.269747	0.116716	0.346105	0.278327	LOC104444681	protein NLP6
Eucgr.J00146	10.3301	11.7202	12.6417	3.51925	3.83902	3.74199	7.81313	7.66995	9.24917	1.60724	1.08145	0.893642	LOC104421012	WAT1-related protein At3g28050
Eucgr.K00749	4.68932	7.77829	5.21856	64.3067	43.7508	46.5998	59.4123	74.4656	92.1454	45.666	43.5511	46.6039	LOC104424720	1-aminocyclopropane-1-carboxylate oxidase
Eucgr.H02218	43.2227	47.8958	48.0445	12.0812	12.7219	8.62674	23.6	26.8778	26.7626	5.20025	6.96784	5.62605
Eucgr.G03258	26.5023	45.0149	28.6866	5.87155	2.5365	1.75562	15.5033	18.7484	15.2321	1.19094	1.4732	0.933523	LOC104454562	scarecrow-like protein 3
Eucgr.I00095	2.82997	9.97376	5.57879	7.61719	18.6076	10.9696	2.70128	5.25697	5.35778	14.0898	14.6269	14.5898	LOC104418050	NAC domain-containing protein 2
Eucgr.I00796	0	0	0	0	0	0.101327	0	0	0	0	0	0.040356	LOC104420373	cytochrome P450 81E8
Eucgr.C03913	0	0	0.29123	0.526859	0	0	0	0.12344	0	0	0	0	LOC104438328	hypothetical protein
Eucgr.F01454	0	0.123058	0	0.954851	0.294852	0	0.504974	1.38077	0.185012	0.598528	0.728023	0.24457	LOC104448667	uncharacterized LOC104448667
Eucgr.C01324	0	0.031028	0	0	0	0	0	0	0	0	0	0
Eucgr.E01574	4.28779	5.27489	5.4522	7.56883	9.27533	6.23022	2.93577	3.77681	3.40706	6.16395	8.75653	6.82429	LOC104446349	uncharacterized LOC104446349
Eucgr.K00081	13.8871	22.8697	16.8923	2.42033	1.61451	3.22073	8.48296	9.63869	13.2225	3.05292	4.03181	3.81136	LOC104424274	binding partner of ACD11 1
Eucgr.E00021	0	0	0	0	0	0	0	0	0	0	0	0
Eucgr.G00765	0.498941	0.597583	0.06373	15.2032	11.9627	12.5645	0.235989	0.291875	0	0.427825	0.685513	0.401123	LOC104455072	probable LRR receptor-like serine/threonine-protein kinase At3g47570
Eucgr.K01343	30.4585	12.8982	27.7081	13.8855	14.802	20.7537	39.9565	48.5165	51.6466	7.96742	8.00404	7.7173	LOC104425168	zinc transporter 8
Eucgr.F00143	0	0	0	1.97229	2.72729	0.218376	0.309332	0.430012	0.245487	3.62769	4.06325	4.38963	LOC104447839	putative cyclin-A3-1
Eucgr.J00065	6.77778	7.08323	8.83118	3.96104	4.63539	4.37367	4.12155	4.72835	4.76427	2.87995	1.99133	1.73388
Eucgr.F02689	37.3291	46.7546	46.9771	12.3015	11.7228	10.131	26.3085	28.6403	22.0613	16.0476	15.1463	17.725	LOC104449584	histone-lysine N-methyltransferase ASHH1
Eucgr.C02371	0.503862	0.314463	0.226721	0.111734	0	0	0.211743	0.467938	0.139322	0	0	0	LOC104439641	vinorine synthase
Eucgr.B02347	3.12883	2.02745	3.94235	7.30876	6.33613	8.96414	3.91146	5.54518	4.88474	2.30482	1.42996	2.13674	LOC104432724	scarecrow-like protein 34
Eucgr.I02221	14.9428	15.7136	16.0903	8.45727	7.32711	8.08563	6.72599	6.47266	7.77576	6.22902	4.1251	5.69329	LOC104419573	uncharacterized LOC104419573
Eucgr.F02829	19.7156	12.6049	15.9542	27.5275	23.631	20.7257	18.5747	17.6063	18.1018	10.1873	8.26653	9.94198	LOC104449699	U-box domain-containing protein 4
Eucgr.E02051	0	0	0	0	0	0	0.129834	0	0	0.084503	0.091973	0.012639	LOC104446583	putative B3 domain-containing protein At1g78640
Eucgr.A01430	6.08219	11.031	8.37207	10.3355	10.638	11.2158	7.23258	9.86472	8.17264	4.124	5.00752	4.63633	LOC104437505	metal-nicotianamine transporter YSL3
Eucgr.C01356	0	0	0	0	0	0	0	0	0	0	0	0
Eucgr.H00790	110.09	110.007	114.305	56.5908	48.1388	63.3498	69.2943	89.7402	84.3516	40.8811	50.8942	46.6092	LOC104456535	ER lumen protein-retaining receptor
Eucgr.G03378	16.3208	27.8398	18.2209	12.8136	13.1221	10.1202	15.9582	15.2768	16.7749	8.20668	7.23245	7.77575	LOC104454654	protein FRA10AC1
Eucgr.H02656	4.83017	5.37502	6.24061	3.95311	5.06586	5.30912	3.6975	4.85053	5.16981	4.28758	3.35054	3.9751
Eucgr.K01296	11.3142	12.9612	10.6772	7.07091	9.83894	7.39501	8.56649	7.76705	8.99558	4.69496	5.02712	4.39056	LOC104425125	acetyltransferase NSI
Eucgr.K01128	0.249061	0.731965	0.26963	0	0	0.382647	2.96145	2.53222	1.22795	6.87639	6.54029	5.70601	LOC104424997	protein LIGHT-DEPENDENT SHORT HYPOCOTYLS 10
Eucgr.E01280	0	0	0	0	0	0	0	0	0	0	0	0
Eucgr.H03725	1.27572	1.98827	1.21404	0.960568	2.04635	1.99222	1.95857	1.30245	2.39739	1.89187	2.36068	2.07375
Eucgr.E03859	322.228	245.158	241.952	21.2736	20.0577	12.2547	63.5988	109.774	59.6514	11.4488	12.3941	12.2019	LOC104445590	oligopeptide transporter 3
Eucgr.K01836	0.82037	2.38376	1.47082	1.28419	2.21653	7.42718	1.46038	0.715958	0.370709	1.80737	2.68474	2.3471	LOC104425491	18 kDa seed maturation protein
Eucgr.G02470	2.39707	1.83337	2.67922	4.28085	4.95053	0.778337	1.99141	1.1744	1.50804	7.79567	7.38547	7.44013
Eucgr.F00140	0	0	0	0	0.032921	0	0.54112	0.698563	0.367643	0.079887	0	0.160884	LOC104447836	isoflavone 2'-hydroxylase
Eucgr.A00308	113.588	100.259	131.883	212.559	184.474	218.666	131.975	98.3974	97.5334	118.785	125.712	122.552
Eucgr.E01086	1.74652	0.323672	0.689385	0	0.142243	0.507238	0	0	0	0.189531	0	0
Eucgr.G02663	83.2448	80.14	91.1603	62.1166	76.5931	72.6585	62.7733	59.2652	56.3464	74.6277	72.6658	67.67	LOC104454073	ubiquitin carboxyl-terminal hydrolase 12
Eucgr.K01990	0.539909	0.93931	0.867512	0.102924	0.503971	0.361203	0.485039	0.345385	0.245344	0	0	0.06481
Eucgr.K01985	1.3251	2.57816	1.48385	0.511329	0.792011	0	3.07956	2.29464	2.26979	1.1494	1.06899	0.981773	LOC104427581	probable leucine-rich repeat receptor-like serine/threonine-protein kinase At3g14840
Eucgr.J01032	6.04494	9.75224	6.15695	1.82723	1.56029	1.26997	3.39489	2.87965	3.35696	2.38979	2.12935	1.01092	LOC104421750	cyclin-dependent protein kinase inhibitor SMR1
Eucgr.A01881	134.194	162.584	118.84	0.223698	0	0	37.8623	62.1598	38.5202	0.453037	0	0.20995	LOC104441099	trans-resveratrol di-O-methyltransferase
Eucgr.H02178	0.398255	0.530536	0.728597	0.629173	0.835376	0.249909	0.13089	0.175555	0.202599	0.250285	0.597034	0.693464
Eucgr.C00459	0	0	0	0	0	0	0	0	0	0	0	0
Eucgr.F01298	2.03711	2.13291	1.71667	2.86966	2.60615	2.55602	1.37533	1.37387	1.5497	1.54397	1.09721	1.50186
Eucgr.C02572	83.1201	129.355	92.5153	8.18808	10.0619	10.15	102.586	117.126	158.367	12.9394	12.2172	12.3068	LOC104437539	omega-6 fatty acid desaturase, chloroplastic
Eucgr.K00839	0.152773	0.733728	0.499986	0.091052	0.115414	0	0.271445	0	0.465459	0.271616	0	0.166003
Eucgr.J02645	0.530811	0.458358	1.0838	0.702883	0.822954	1.34626	3.30689	3.81064	3.11321	0.691575	1.37014	0.730858
Eucgr.F01739	0	0	0	0	0	0	0	0	0	0	0	0	LOC104451681	uncharacterized LOC104451681
Eucgr.L02323	0	0	0	0	0	0	0	0	0	0	0.313161	0	LOC104430539	cytochrome P450 CYP749A22
Eucgr.E04314	0	0	0	0.090212	0.110514	0	0	0.095791	0	0	0	0	LOC104447731	protein UNUSUAL FLORAL ORGANS
Eucgr.I00181	0	0	0	0.058486	0	0.170538	0	0	0	0	0	0
Eucgr.H04404	0	0	0	0	0.053992	0	0.080126	0	0	0	0	0
Eucgr.H01551	0	0.28943	0.276501	0.672776	1.08123	1.19514	0.625348	0.530697	0.172347	1.20903	1.15866	1.52465
Eucgr.F00750	28.2389	27.3379	27.3066	28.6076	30.5153	33.4445	26.9337	28.3086	28.5447	15.314	14.1133	16.5209	LOC104448222	uncharacterized LOC104448222
Eucgr.D00712	100.601	144.929	110.566	239.572	260.449	237.494	243.731	233.438	287.934	381.974	364.531	369.367	LOC104441074	F-box protein SKIP27
Eucgr.B00959	0	0	0	0	0	0	0	0	0	0	0	0
Eucgr.C01238	19.5748	22.4399	19.4103	6.3989	6.66171	5.5695	20.0661	22.7056	21.0826	8.89597	10.4613	7.93707	LOC104436716	lactation elevated protein 1
Eucgr.D00005	4.30713	3.08111	3.41921	0.775399	1.4099	1.32934	3.31532	2.93483	3.39728	2.55885	2.96662	2.87168
Eucgr.D02054	0.498065	0.169864	0.480745	0.968283	0.680162	0.518754	0.254704	0.322666	0.446705	0.273391	0.612318	0.704565
Eucgr.C00690	0	0	0	0	0.742717	0	0	0	0	0.553389	0.318163	0	LOC108958104	17.3 kDa class II heat shock protein-like
Eucgr.D00703	83.4335	89.4254	75.2017	0.047981	0.016838	0	60.5693	46.4961	52.5743	0.038792	0	0.039191	LOC104441065	beta-galactosidase 8
Eucgr.B02893	7.08763	6.57817	7.35669	18.3752	16.0517	11.5567	7.97087	8.08186	6.94801	12.3322	11.9775	12.1998	LOC104433190	ABC transporter G family member 7
Eucgr.G01894	11.9953	9.9421	15.2121	10.3638	9.75852	2.93845	8.57305	9.37126	9.46949	14.0935	13.7141	14.5094	LOC104453502	deSI-like protein At4g17486
Eucgr.I00633	33.9682	39.141	42.0262	37.4003	29.9432	23.4616	40.66	33.6231	35.8801	35.977	35.2296	33.769	LOC104418400	probable sphingolipid transporter spinster homolog 2
Eucgr.L00029	5.81105	5.89043	5.51849	2.47879	2.18274	3.60853	8.04383	8.53371	9.04036	3.46249	4.11621	2.8801	LOC104428022	acyl-coenzyme A thioesterase 9, mitochondrial
Eucgr.L00962	0	0	0	0	0	0	0.393287	0	0.28161	0.423999	0	0	LOC104429034	cysteine-rich receptor-like protein kinase 1
Eucgr.C00684	0	0	0	0	0.333429	0	0	0	0	0	0	0
Eucgr.B03313	46.8387	90.9041	65.6922	23.8952	19.8099	20.4501	49.144	49.2037	62.6066	18.733	19.2596	19.0931	LOC104433528	pantothenate kinase 1
Eucgr.H05027	1.04932	1.13197	0	0.492743	0.632909	0.98135	0	0	0	0	0	0	LOC104417896	uncharacterized LOC104417896
Eucgr.F02002	0	0	0	0.100211	0	0.105732	0	0	0	0.354371	0.359402	0.435617	LOC104451767	probable amino acid permease 7
Eucgr.D01966	64.8744	46.1363	58.0702	51.7156	44.7033	31.7899	103.066	77.9586	59.8483	46.6483	49.1226	48.5145	LOC104441841	zinc finger A20 and AN1 domain-containing stress-associated protein 1
Eucgr.C02919	0	0	0	0	0	0	0	0	0	0	0	0	LOC104439922	carotenoid 9,10(9',10')-cleavage dioxygenase 1-like
Eucgr.J02241	0	0	0	0	0	0.14816	0	0	0	2.24445	2.09677	2.03856	LOC104423906	MADS-box protein GGM13
Eucgr.E01923	0	0	0	0.122548	0	0	0	0.145646	0.13338	0.274521	0.728192	0.013961	LOC104446504	putative B3 domain-containing protein At1g78640
Eucgr.H02794	0	0	0.080669	0	0.0584	0.212726	0.024921	0	0.048642	0	0.022253	0.070087	LOC104414345	UPF0481 protein At3g47200
Eucgr.L00273	0	0	0	0	0	0	0	0	0	0	0	0	LOC104428293	xanthine dehydrogenase
Eucgr.A00303	0	0	0	0	0	0	0	0	0	0	0	0	LOC104451753	anthocyanidin 3-O-glucosyltransferase 7
Eucgr.G03272	42.3191	51.5373	45.8978	29.3381	26.3767	25.0155	21.355	23.167	23.6932	22.7195	23.6984	22.284	LOC104454575	uncharacterized LOC104454575
Eucgr.A00324	0	0	0	0	0	0	0	0	0	0	0	0
Eucgr.F03301	0	0.141739	0	0.341992	0.169237	0	0	0	0	0.627454	0.951429	0.281221	LOC104450117	uncharacterized LOC104450117
Eucgr.L01645	0.390195	0.431464	0.773238	0	0	0	0	0.170938	0.092972	0	0	0
Eucgr.K02948	7.69919	7.84107	8.83774	0	0	0	3.84228	4.41204	2.02874	0.146946	0	0	LOC104426350	macrophage migration inhibitory factor homolog
Eucgr.H03942	1.67055	2.59969	1.42349	0.395177	0.421273	0.420578	0.406633	0.382297	0.501514	2.78767	1.92533	2.34012
Eucgr.G02727	1.778	2.56843	4.81966	7.9388	5.36786	4.7929	23.4	17.3644	17.8325	5.33163	5.52998	4.5093	LOC104454126	phosphoglucan phosphatase DSP4, amyloplastic
Eucgr.F03226	0.456261	0.32131	0.637784	2.73126	3.27428	2.7321	0.562286	0.400419	0.35215	3.06236	3.2131	3.28902	LOC104450058	protein Jade-1
Eucgr.G01195	0.678678	1.6557	0.246727	0	0	0	0.442058	1.50368	1.28877	0.172515	0	0.088626	LOC104453067	serine carboxypeptidase-like 13
Eucgr.E00985	3.95544	6.13647	5.43214	3.0299	3.84771	5.25901	3.0547	2.16456	0.935819	0.302829	0	0.544003
Eucgr.B00355	0.082427	0.07913	0	0.419472	0.060056	0	0.492002	0.408702	0.113863	0.117467	0	0.069559	LOC104418481	spermidine synthase 1
Eucgr.H00026	258.097	319.125	293.789	178.69	151.731	139.167	297.46	244.012	252.798	285.958	285.605	288.581	LOC104456006	glycine-rich RNA-binding protein 4, mitochondrial
Eucgr.L01341	0	0	0	0	0	0	0	0	0	0	0	0	LOC104429456	protein SIEVE ELEMENT OCCLUSION B
Eucgr.E00130	0	0	0	0	0	0	0	0	0	0	0	0	LOC104445903	U-box domain-containing protein 33
Eucgr.B02659	3.71259	5.28854	4.46246	1.41175	1.46742	1.11641	4.49461	4.17879	4.05396	2.07987	1.44851	1.91207	LOC104433014	pentatricopeptide repeat-containing protein At4g14050, mitochondrial
Eucgr.I00284	0	0	0	0	0	0	0	0	0	0	0	0	LOC104420191	citrate-binding protein
Eucgr.F00454	1.28624	0.906761	1.16306	0	0	0	6.49652	2.78072	2.49644	0.744669	0.455208	0.363299
Eucgr.A00665	0	0	0	0	0	0	2.27514	2.51565	3.33736	13.7376	13.1254	17.3854	LOC104429966	UPF0481 protein At3g47200
Eucgr.G00559	5.68075	8.12176	5.9813	5.02134	3.81138	4.00583	13.3942	8.34476	12.8	3.21015	3.58992	4.41858	LOC104452688	thiamine biosynthetic bifunctional enzyme TH1, chloroplastic
Eucgr.F00491	0.146891	0.318598	0.078574	0	0.08504	0.088999	0.401981	0.755081	0.53444	0.090103	0.313415	0	LOC104448076	cytochrome P450 87A3
Eucgr.J01393	0	0	0.504302	3.94121	2.60133	0.393931	0.672967	9.00452	2.02818	2.09736	1.89576	2.18221	LOC104422037	COBRA-like protein 4
Eucgr.A01052	0	0	0.341325	0.101097	0	0.198915	0.109233	0.110938	0.317348	0	0	0.242951
Eucgr.J00070	0.44848	0.994481	0.616661	1.71292	1.48316	0.311067	2.94657	2.46415	1.90364	0	0.340715	0.12327	LOC104420945	cytosolic sulfotransferase 15
Eucgr.F04030	57.7484	54.756	54.9064	33.6656	33.5091	19.992	58.7485	57.5331	61.4562	35.8867	35.5771	36.113	LOC104450698	V-type proton ATPase catalytic subunit A
Eucgr.H04815	37.2745	21.7845	34.9997	0.665989	2.33347	1.4306	7.4935	6.07809	4.22588	6.77877	6.30284	6.66956	LOC104415812	inositol-3-phosphate synthase
Eucgr.H01290	0	0	0	0	0	0	0	0	0	0	0.095822	0
Eucgr.E03265	85.0326	67.2719	80.8273	49.8125	45.9456	47.13	33.6374	39.3519	37.1887	24.4427	25.9066	24.5879	LOC104445261	protein SMG7L
Eucgr.K00824	0	0	0	0	0.439245	0	0.127838	0.045784	0.158851	0	0.190046	0
Eucgr.B01568	5.54502	8.15098	7.0999	3.38847	4.62833	4.80302	6.72637	6.42406	5.81872	2.36211	2.53783	2.40907	LOC104428195	TBC1 domain family member 15
Eucgr.H01460	0	0.020832	0	0	0.371854	0	0	0	0	0	0	0
Eucgr.E01162	0	0	0.097823	0	0	0	0	0.249945	0.3548	0	0	0	LOC104446196	methanol O-anthraniloyltransferase
Eucgr.A00620	0	0	0	0	0	0	0	0	0	0	0	0
Eucgr.A01343	0	0	0	0	0	0	0	0	0	0	0	0	LOC104455463	MDIS1-interacting receptor like kinase 2
Eucgr.F02423	108.006	138.826	139.571	36.5404	49.5241	53.6057	243.369	208.388	261.049	100.284	98.8949	97.765	LOC104449373	annexin D1
Eucgr.K01671	1.43571	1.3931	0.652657	0.591503	1.51128	1.08243	1.40594	1.83146	0.831752	0.744815	0.771718	0.164321	LOC104425395	psbP domain-containing protein 6, chloroplastic
Eucgr.F00890	0.088084	0	0.281135	0.306398	0.043056	0	0.09598	0.177247	0.327915	0.229319	0.563561	0.465102
Eucgr.E00520	0	0	0	0.027378	0.152757	0.117093	0	0	0	0	0	0	LOC104445993	L-type lectin-domain containing receptor kinase VIII.2
Eucgr.C00084	5.35311	3.21328	5.90587	0	0.392933	0.094909	2.09849	2.85117	2.18638	0.436685	0.103407	0.827443	LOC104438731	plant intracellular Ras-group-related LRR protein 6
Eucgr.F02631	8.89406	12.6526	8.81832	3.61914	2.86716	4.11434	10.1152	11.2146	11.1424	6.76826	6.07673	6.53836	LOC104449533	embryogenesis-associated protein EMB8
Eucgr.D00344	3.52052	3.27536	4.3651	35.6041	25.0012	11.0075	3.64033	6.65029	5.91864	8.85371	10.0213	9.11107	LOC104440830	uncharacterized LOC104440830
Eucgr.L00500	0	0	0	0	0	0	0	0	0	0	0	0	LOC104428552	7-deoxyloganetin glucosyltransferase
Eucgr.J00730	0	0	0	0	0	0	0	0	0	0	0	0
Eucgr.J02505	0.028919	0	0	0	0	0	0	0	0	0	0	0
Eucgr.K03599	44.5041	17.5876	84.6815	301.092	275.623	288.226	129.901	60.7895	63.1874	117.563	127.584	113.353	LOC104426870	alcohol dehydrogenase 3
Eucgr.H04895	1.64155	1.58922	1.00125	0.724249	0.433296	1.24665	3.76432	3.73453	2.75122	0.617105	0.551156	0.199408
Eucgr.B01237	0	0	0	0	0	0	7.70344	6.9395	6.48425	2.96117	2.46009	3.15295	LOC104425435	putative disease resistance protein RGA3
Eucgr.D02410	0	0	0	0	0	0	0	0.269868	0.325956	0.272195	0	0.330691
Eucgr.E03511	0.048558	0	0.111843	0	0	0.063315	0.307515	0	0	0	0	0
Eucgr.H04024	0.058225	0.481899	0	0	0	0	0	0.090105	0	0.190608	0	0	LOC104417538	uncharacterized LOC104417538
Eucgr.I00997	0	0	0	0	0	0	0	0	0	0	0	0
Eucgr.K03387	0.292335	0.167721	0	0	0	0	0	0	0	0	0	0	LOC104427948	proline-rich protein 13
Eucgr.J01198	0	0	0	0.068802	0	0	0.058899	0.11884	0	0	0	0.00712
Eucgr.E01750	0	0	0	0	0	0	0	0	0	0	0	0
Eucgr.G01488	0	0	0	0	0	0	0	0.10926	0	0	0	0
Eucgr.B01642	0.054923	0	0	0	0	0	0	0	0	0	0	0
Eucgr.E03951	51.0223	56.6872	51.3401	18.5706	18.4925	14.5413	35.6138	40.2567	36.565	25.2659	28.2427	28.1148	LOC104445649	transcription initiation factor IIF subunit alpha
Eucgr.K00068	73.8433	119.675	77.0615	54.4301	52.4392	66.8181	22.6752	23.855	19.7645	22.3913	16.8374	21.4378	LOC104424262	probable tocopherol O-methyltransferase, chloroplastic
Eucgr.D00975	0.195371	0	0.138184	2.89346	1.95499	0.740633	0.225024	0.131375	0.314446	4.15105	4.31993	4.81914	LOC104441197	protein ENDOSPERM DEFECTIVE 1
Eucgr.K00194	0	0	0	0	0	0	0	0	0	0	0	0	LOC104424371	MADS-box protein AGL42
Eucgr.A02627	1.08018	1.13418	1.2044	0.105655	1.61533	1.00497	0.538491	0.182502	0.873347	0.571771	0.943037	0.597775
Eucgr.K03098	0	0	0	0	0	0	0	0	0	0	0	0
Eucgr.J03122	2.75919	3.36509	2.70693	0.670654	1.16572	0.193663	4.11972	4.69688	5.69128	1.20263	1.09475	0.776186	LOC104423235	magnesium transporter MRS2-1
Eucgr.I02040	2.31324	3.62146	2.92966	1.13865	3.33731	2.56794	1.29946	1.52615	0.651858	1.60391	2.14232	3.18529	LOC104419429	putative methylesterase 11, chloroplastic
Eucgr.B00351	2.12103	2.61708	1.35986	2.46432	1.97908	0.934165	3.26863	2.66227	4.433	1.74697	2.24077	2.06466	LOC104418429	WAT1-related protein At3g28050
Eucgr.F00327	4.03884	6.27537	5.09163	6.36621	10.2878	10.9259	8.60926	5.19433	8.26109	1.14238	1.12872	1.23784
Eucgr.C02283	0	0	0	0	0	0	0	0	0	0	0	0	LOC108958383	zinc finger protein 2-like
Eucgr.K03419	0	0	0	0	0	0	12.5159	48.7703	11.8308	0	0	0	LOC104426706	stress-response A/B barrel domain-containing protein HS1
Eucgr.B00516	0.608034	1.15441	0.362291	0.292665	0.367644	0.099467	4.34764	4.82629	5.82345	3.8236	3.38748	3.42862	LOC104419840	cysteine-rich receptor-like protein kinase 1
Eucgr.A00977	0	0	0	0	0	0	0	0	0	0.208618	0	0
Eucgr.D01089	0	0	0	0	0	0	0	0	0	0.121888	0.067188	0.070597
Eucgr.H00204	1.31362	0.964265	0.852279	0	0	0	10.6275	25.3086	8.46272	0.385672	0.067396	0.429225	LOC104456129	protein SIEVE ELEMENT OCCLUSION B
Eucgr.F03526	0.548763	0.305646	1.20036	0.142113	0.20864	0.288231	0.964296	0.780809	0.763703	0.292598	0.408268	0.47005	LOC104450292	high mobility group B protein 9
Eucgr.B00207	13.4345	10.2173	13.0189	8.37938	7.23482	4.77584	0	0	0	0.435864	0.428418	0.43555	LOC104434244	cytochrome P450 71A3
Eucgr.A01245	60.5946	54.8056	63.4647	60.983	65.5319	51.2613	56.4562	48.6919	55.6369	86.7598	84.1403	84.9277	LOC104436438	actin-depolymerizing factor 2
Eucgr.B03831	1.35827	1.00933	1.41699	2.96392	2.77491	2.13269	1.51239	1.44706	1.19499	1.72116	1.6472	1.6493
Eucgr.A00322	0	0	0	0	0	0	0	0	0	0	0	0	LOC104451961	inactive glucose-1-phosphate adenylyltransferase small subunit 2, chloroplastic
Eucgr.H03701	0	0	0	0	0	0	0	0	0	0	0	0
Eucgr.E00951	0	0	0.38025	0.269724	0.427731	0	0	0	0	0	0	0
Eucgr.H04235	111.4	96.2569	109.177	7.74638	5.79961	3.95571	20.1003	24.2253	18.4124	6.04925	6.11954	6.10374	LOC104415369	protein LIGHT-DEPENDENT SHORT HYPOCOTYLS 1
Eucgr.F02942	0	0	0	0	0	0	0	0	0	0	0	0
Eucgr.E00891	0	0	0	0	0	0	0.170039	0.243561	0	0.310603	0.147535	0.262781	LOC104446111	probable disease resistance RPP8-like protein 2
Eucgr.L03030	0	0	0	0	0	0	0	0.099356	0	0	0	0
Eucgr.E03053	0	0	0	0	0	0	0	0	0	0	0	0	LOC104447077	putative receptor-like protein kinase At4g00960
Eucgr.I00817	0	0	0	0	0	0	0	0	0	0	0	0
Eucgr.A00823	0.112404	0	0	0	0	0	0.153132	0.777872	0.074598	0	0	0	LOC104433141	uncharacterized LOC104433141
Eucgr.A00285	170.376	136.533	176.855	66.8221	71.2649	63.6504	194.155	201.427	220.291	76.0351	76.165	73.8186	LOC104447947	calreticulin-3
Eucgr.F02653	1.13365	6.05728	1.51926	3.41178	2.02402	2.16863	2.67972	1.31132	1.37312	2.32817	1.62682	2.59665	LOC104449553	putative laccase-9
Eucgr.K02102	26.0825	10.028	12.6569	37.4772	24.3552	22.4362	8.1526	17.0885	13.4298	15.8475	15.587	17.4177	LOC104427616	MDIS1-interacting receptor like kinase 2
Eucgr.J01800	105.922	98.6146	98.1989	108.237	81.1406	93.993	62.1848	85.7531	86.749	61.9109	62.0597	60.4482	LOC104422305	uncharacterized LOC104422305
Eucgr.H00495	0.112539	0.962339	0.490664	3.19338	1.27908	0.997324	1.1731	1.57968	0.749871	8.34775	8.81032	11.0756	LOC104456330	rho GDP-dissociation inhibitor 1
Eucgr.F04403	0	0	0	0	0	0	0	0.171353	0	0	0.074575	0
Eucgr.F01658	120.454	131.089	126.466	48.4358	44.0381	33.2261	66.6816	60.8135	64.6354	48.5977	42.133	43.6924	LOC104448844	putative ER lumen protein-retaining receptor C28H8.4
Eucgr.L01906	0	0.344243	0	0	0.572823	0	0.177025	0	0	0	0	0
Eucgr.J01707	0.090572	0.60809	0	0	0	0	0	0	0	0	0	0	LOC104422239	UPF0481 protein At3g47200
Eucgr.C00252	26.3554	47.4319	34.0959	8.11988	9.89398	9.25829	53.6635	43.2281	45.1954	23.3513	23.0063	21.6835	LOC104436030	uncharacterized LOC104436030
Eucgr.B01146	6.68302	10.6844	6.60775	0	0.101072	0	1.58728	1.666	2.09557	0.331058	0.683112	0.48818	LOC104424863	adenylate isopentenyltransferase 5, chloroplastic
Eucgr.L03693	0	0	0	0.456471	0.650264	0	10.8108	6.87851	7.48425	10.3581	11.5313	10.4848
Eucgr.C01684	2.93445	3.54888	3.12735	5.15238	6.43237	6.28715	4.44849	3.65404	3.75756	5.41227	5.79578	4.58206	LOC104436994	hypothetical protein
Eucgr.B01240	0.460735	0.844016	0.680849	0.842347	1.53776	1.02388	0.630358	0.930226	0.656712	2.02559	2.19984	1.43366	LOC104425493	NADH dehydrogenase [ubiquinone] 1 alpha subcomplex subunit 8-B
Eucgr.J00854	190.882	159.379	169.886	122.439	145.274	160.71	106.415	105.923	92.4509	103.401	101.334	100.867	LOC104421588	probable splicing factor 3A subunit 1
Eucgr.E03471	0	0	0	0	0	0	0	0	0	0	0.083969	0	LOC104445365	calmodulin-binding protein 60 D
Eucgr.H00694	0	0	0	0.091526	0.079469	0.52744	0.178388	0.225332	0.305173	0.676149	0.17566	0.374712	LOC104416285	UDP-glycosyltransferase 74D1
Eucgr.K00720	0	0	0	0	0	0	0	0	0	0	0	0
Eucgr.G02796	57.4284	73.2821	58.0375	36.6792	45.2628	43.5539	50.116	46.3561	39.1051	56.2153	43.6548	63.8445	LOC104454181	nuclear transcription factor Y subunit B-1
Eucgr.A01119	4.4402	7.32507	4.88715	5.997	7.42416	5.07367	6.43931	5.86089	6.77597	1.99885	1.88776	2.04544	LOC104435317	arogenate dehydratase/prephenate dehydratase 1, chloroplastic
Eucgr.F00325	0.35317	0.578956	0.23118	1.84206	1.31757	4.10226	4.01461	2.04713	3.92326	4.73929	3.79146	4.65931	LOC104447949	myb-related protein 330
Eucgr.B02319	0.122212	0	0	1.26579	5.51396	4.0961	0.237446	0	0	1.13575	0.859803	0.690428	LOC108956270	hypothetical protein
Eucgr.L00975	1.80541	2.47315	1.72055	0	0.625397	0	2.43414	0.875604	1.38587	0.9076	0.182055	0.945664
Eucgr.E01799	0	0	0	0	0	0	0	0	0	0	0	0	LOC104446442	TMV resistance protein N
Eucgr.G01556	0.274669	0.640025	0.480956	0.615596	0.879481	0.277861	0.342552	0.788951	0.083736	0.631466	0.751182	0	LOC104453260	NAC domain-containing protein 37
Eucgr.K02603	0	0	0	0	0	0	0	0	0	0	0	0
Eucgr.L03244	21.7654	11.141	18.7918	1.98266	6.10061	4.59797	1.18828	1.78657	2.23489	16.877	15.6703	18.9626
Eucgr.A01690	30.7258	32.851	34.6629	26.8001	29.3453	28.7351	33.2503	30.4737	29.5435	31.9599	33.5185	29.3032	LOC104439635	TSL-kinase interacting protein 1
Eucgr.J03126	151.454	91.4051	126.84	360.256	259.5	234.156	69.3436	117.194	104.337	105.645	106.772	110.603	LOC104423238	shikimate O-hydroxycinnamoyltransferase
Eucgr.H03075	5.16213	5.91162	4.08762	11.8902	10.77	13.4302	115.156	160.456	96.7126	758.474	672.742	713.762
Eucgr.E03680	1.76021	1.42222	1.74397	2.48091	2.3015	1.42787	13.0057	8.22747	9.28235	8.50365	8.63886	9.58925	LOC104445509	protein PGR
Eucgr.L00183	0	0	0	0	0	0	0	0	0	0	0	0	LOC108956477	putative receptor-like protein kinase At3g47110
Eucgr.G03159	0	0	0	0	0	0	0	0	0.038282	0	0	0	LOC104455927	LRR receptor-like serine/threonine-protein kinase ERECTA
Eucgr.A02138	15.9859	14.8843	17.2726	20.2836	19.4735	13.9756	16.2094	16.3547	12.8893	27.2661	26.9309	24.8788	LOC104443285	replication factor C subunit 3
Eucgr.B01252	0	0	0	0	0	0	0.120967	0.22568	0.196363	0.211012	0.116281	0.164266	LOC104434723	putative disease resistance protein RGA4
Eucgr.C04256	0	0	0	0	0	0	0	0	0	0	0	0.131154	LOC104440504	mavicyanin
Eucgr.B00634	0	0.123181	0	6.32013	8.19981	3.86631	1.06562	0.297891	0.565514	18.8818	21.7062	22.2626	LOC104420971	truncated transcription factor CAULIFLOWER A
Eucgr.K00719	0.868866	0	2.67084	194.942	184.489	141.784	73.8312	75.8852	44.6749	213.519	216.156	221.22	LOC104424692	uncharacterized LOC104424692
Eucgr.G02341	0.196759	0	0.173975	0.485913	0.677381	0	0.715462	0.429543	0.506998	0.864882	0.92312	0.895192	LOC104453810	transcription factor TGA2.3
Eucgr.C01513	0	0	0	0	0	0	0	0	0	0.315288	0	0.325018
Eucgr.D00694	2.80365	3.29528	3.10387	0.15537	0.186906	0.434731	0.312276	0.690322	0.654232	0.413205	0.235947	0.452109	LOC104441059	keratin, type II cytoskeletal 2 epidermal
Eucgr.A01480	4.00517	2.59264	4.07794	66.1771	56.8361	51.2798	51.6618	41.5128	28.6909	93.2221	80.6277	79.613	LOC104455873	rust resistance kinase Lr10
Eucgr.A02431	0.107958	0.193411	0.216655	0.083638	0.096038	0.154235	0	0	0	0	0	0
Eucgr.B00450	2.27839	2.80514	2.46873	5.04639	5.34339	3.49912	3.54272	2.32016	2.20326	6.5334	6.61135	6.15898	LOC104419315	probable disease resistance protein At4g27220
Eucgr.D01087	18.8113	21.9076	27.4101	21.0269	43.7093	96.3183	108.451	135.539	59.0229	237.673	229.654	241.508	LOC104441284	probable mannitol dehydrogenase
Eucgr.L02150	30.6432	40.1929	38.4011	143.175	141.148	166.331	77.0697	57.8641	59.9449	242.72	247.364	267.386	LOC104430368	zinc finger protein ZAT12
Eucgr.C01807	5.28476	4.77238	2.9051	2.6746	3.93379	1.82219	31.4471	26.1168	39.1377	7.95771	8.47346	8.17101	LOC104437075	uncharacterized LOC104437075
Eucgr.E03523	231.922	214.012	268.136	123.336	110.911	105.169	424.488	376.437	398.004	40.128	43.5758	41.3168	LOC104445409	calmodulin-binding receptor-like cytoplasmic kinase 3
Eucgr.D01216	36.9829	29.7296	36.8157	15.5832	15.2573	11.6055	13.4416	13.4286	10.8029	14.4691	13.6298	13.4554	LOC104441356	pentatricopeptide repeat-containing protein At1g02150
Eucgr.C03952	6.08932	7.854	9.19864	6.22241	6.75574	6.76896	15.7345	14.1805	13.2162	8.89942	7.83626	7.9457	LOC104440397	pentatricopeptide repeat-containing protein At5g18950
Eucgr.K00482	49.5371	27.6204	39.3034	7.53003	7.06999	19.9905	39.6354	45.0113	33.7163	29.8296	36.9351	27.259	LOC104424582	ribonuclease Y
Eucgr.A00020	878.461	493.348	834.395	249.873	177.138	165.96	741.997	732.801	720.651	113.645	120.453	119.761	LOC104443583	endochitinase EP3
Eucgr.C02390	0.853107	0.330807	0.637912	0	0.197824	0	11.065	2.42656	20.0133	0	0.146695	0.165469	LOC104439656	glycine-rich protein 5
Eucgr.G00756	0	0	0	0	0	0	0	0	0	0	0.38795	0.223277
Eucgr.L01178	0	0	0	0	0	0	0	0	0	0.073801	0	0	LOC104429290	uncharacterized LOC104429290
Eucgr.E03144	0	0	0	0	0	0	0.223163	0.168733	0	0	0	0.202887
Eucgr.A01490	0.474467	2.05026	1.62931	0.63588	2.87932	2.41528	2.36093	2.21052	2.90767	1.27584	1.48683	2.20204
Eucgr.H00080	1.6077	1.2608	2.05055	1.31136	2.36819	2.93645	3.40358	3.54592	3.60335	2.72469	3.38177	2.98179	LOC104456047	F-box protein PP2-B11
Eucgr.H04660	0.606534	0.20309	0.321991	0	0	0.029115	0.165059	0.163424	0	0	0	0.033	LOC104417755	ankyrin repeat domain-containing protein 17
Eucgr.A01874	0	0	0	0	0	0	0	0	0	0	0.288259	0.123621	LOC104456966	trans-resveratrol di-O-methyltransferase
Eucgr.G02565	34.3687	37.4011	34.4979	27.2479	36.1793	31.2485	36.309	35.2255	32.2349	25.8949	26.4512	24.4678	LOC104453997	pre-mRNA-processing protein 40C
Eucgr.B00875	8.67951	7.1302	8.0192	5.5396	5.39413	8.31106	16.4911	16.6113	17.1371	5.56091	7.51758	5.38568	LOC104422223	uncharacterized LOC104422223
Eucgr.E03185	0.896485	1.06571	1.13037	0.737535	0.527837	0.376305	0.059504	0.185273	0.054732	0	0.088922	0.164264	LOC104447165	disease resistance-like protein CSA1
Eucgr.B00646	12.6151	11.3646	12.1808	15.2269	14.7325	14.4356	16.8863	16.6626	15.4637	19.9797	21.7597	20.3438	LOC104421060	uncharacterized LOC104421060
Eucgr.B03695	36.7819	36.2091	43.5985	29.1135	30.1699	40.5212	47.6963	45.2132	41.4436	46.5282	42.8739	40.9594	LOC104433852	cinnamoyl-CoA reductase 1
Eucgr.D00473	0.096957	0.269472	0	0	0	0.157342	0	0	0	0.944778	0.614779	0.925054
Eucgr.F04273	0	0	0	0	0	0	0	0	0	0	0	0	LOC104452330	bidirectional sugar transporter SWEET1
Eucgr.C00297	0.049806	0	0	0	0	0	1.79503	1.58655	1.638	0.637491	0.539236	0.674094	LOC104436051	disease resistance protein RPP5-like
Eucgr.F03414	202.698	193.663	246.476	324.873	329.951	328.092	735.772	692.41	659.736	167.876	163.966	166.179	LOC104450197	scarecrow-like protein 21
Eucgr.C04268	0	0	0	0	0	0	0	0	0	0	0	0	LOC104438578	TMV resistance protein N
Eucgr.C03264	24.6944	28.4957	26.9865	13.088	11.8572	7.32379	10.6378	9.65054	9.6848	7.91672	7.21124	7.87457	LOC104437997	tubulin--tyrosine ligase-like protein 12
Eucgr.C03503	0	0	0	0.179643	1.76053	0.628365	0	0	0	0	0	0
Eucgr.I00688	2.74094	2.39971	3.44981	0.326324	0.480171	0.516575	2.55387	1.9893	1.23671	0.230955	0.519621	0.347663	LOC104418428	uncharacterized LOC104418428
Eucgr.C00234	0	0.064575	0	0	0	0	0.099814	0.067506	0.064868	0	0	0	LOC104438771	uncharacterized LOC104438771
Eucgr.E04065	0	0	0	0	0.150831	1.00436	0	0	0	0	0	0
Eucgr.F00549	0.526603	0.527786	0.637765	0.535485	0.608001	0.4254	1.17734	0.610888	0.718564	0.330404	0.37534	0.294633	LOC104451266	putative disease resistance protein At1g63350
Eucgr.C03287	20.8449	17.9934	18.5797	11.6209	10.9446	5.32525	7.14531	7.1637	6.09745	12.6107	10.9559	11.5874	LOC104438002	mediator of RNA polymerase II transcription subunit 22b
Eucgr.J01371	2.00276	1.75292	1.47834	10.4504	10.9976	8.24977	2.97405	4.99889	2.54779	12.4835	11.7866	12.3159	LOC104422016	biotin carboxyl carrier protein of acetyl-CoA carboxylase 2, chloroplastic
Eucgr.H03318	0	0	0	0	0	0	0	0	0	0	0	0
Eucgr.K02245	0.349264	0	0.121925	0	0	0	0.057651	0.496899	0.082696	0	0	0	LOC104425811	uncharacterized LOC104425811
Eucgr.C01932	0.703112	0.337223	0.215108	0.171422	0.167983	0.498884	2.3135	1.20092	1.33686	1.35504	1.75548	1.82092	LOC104437128	TMV resistance protein N-like
Eucgr.L01727	0	0	0	0	0	0	12.2997	11.8026	12.2841	23.8567	19.2253	22.1714	LOC104429887	uncharacterized LOC104429887
Eucgr.E02485	0	0	0	0	0	0	0	0	0	0	0	0
Eucgr.F03088	26.6156	34.7238	31.6317	7.13699	8.54114	13.2181	95.2851	92.0399	97.395	8.25226	7.91601	7.90763	LOC104449931	protein CHUP1, chloroplastic
Eucgr.B03341	0	0	0.012719	0.098887	0.075681	0	0.063224	0.152592	0.035466	0.135562	0.247476	0.153532	LOC104435637	polygalacturonase non-catalytic subunit AroGP2
Eucgr.E02835	0	0.093505	0	0	0	0	0	0.361873	0.183726	0	0.634085	0.552528	LOC104445053	zinc finger CCCH domain-containing protein 48
Eucgr.F04070	38.031	33.9697	30.8754	28.0852	32.1981	24.4838	40.7643	31.0039	37.0025	32.393	34.2714	32.2094	LOC104450729	hydroxypyruvate reductase
Eucgr.D01099	0.731549	0.868845	1.15368	1.86133	1.35043	1.77653	0.489338	0.741315	0.569969	1.06719	0.815568	0.940292	LOC104441291	uncharacterized LOC104441291
Eucgr.B00057	96.7796	88.2877	93.5549	137.375	121.57	144.425	93.8152	103.003	103.08	96.1266	93.6474	90.2821	LOC104416398	phytanoyl-CoA dioxygenase
Eucgr.F04230	26.8263	22.2293	26.0873	36.7967	33.6907	20.7526	23.3686	22.1008	23.1909	31.8531	32.1167	33.5016	LOC104450853	uncharacterized LOC104450853
Eucgr.C02762	0	0	0	0	0	0	0	0	0.182334	0.101645	0.124286	0
Eucgr.F02213	26.2447	41.8754	31.2681	4.77737	8.19393	9.05871	27.5698	27.4362	31.1842	6.86163	8.70824	8.69491	LOC104449231	uncharacterized LOC104449231
Eucgr.A01406	24.4507	8.06338	21.3348	61.1525	74.0922	74.5868	6.78526	7.59189	6.10486	36.6345	38.5788	36.3947	LOC104437281	ribosome-binding factor PSRP1, chloroplastic
Eucgr.A00788	0	0	0	0	0.566053	1.10025	0	0	0	0.804842	0.337083	0.740794	LOC104432823	acid phosphatase 1
Eucgr.C03379	0	0	0	0	0	0	0	0	0	0	0	0
Eucgr.J00740	1.99596	0.94423	0.514923	1.00481	0.200289	0	0.23861	0.904191	0.354311	0	0.492559	0.328014
Eucgr.J03182	20.191	34.6756	22.0607	14.0447	11.733	9.92158	27.5734	27.0739	33.7424	19.5921	16.0377	16.2811	LOC104423275	probable mitochondrial adenine nucleotide transporter BTL1
Eucgr.A01811	11.5845	13.0834	15.5638	12.3002	14.0726	13.2073	22.0961	15.3761	13.7557	7.52703	7.07859	6.32891	LOC104440633	uncharacterized LOC104440633
Eucgr.E03368	0	0	0	0	0	0	0.309472	0	0	0	0	0	LOC104447262	uncharacterized LOC104447262
Eucgr.D00853	78.3465	46.8993	78.5671	173.442	188.979	129.523	91.3704	76.0739	72.5563	183.18	198.071	206.232	LOC104441148	thioredoxin-like protein CXXS1
Eucgr.L02322	4.7448	3.64217	3.59215	4.25054	4.77029	4.17236	12.3875	9.70964	13.1773	10.6179	7.92262	9.81733	LOC104430538	U-box domain-containing protein 33
Eucgr.I00207	0	0	0	0	0	0	0	0	0	0	0	0
Eucgr.K01374	0	0	0.390171	0	0.149704	1.48343	0.360387	0	0	0	0	0.102087	LOC104425192	uncharacterized LOC104425192
Eucgr.H01466	5.16844	4.46607	4.23359	7.70255	7.87086	5.75297	4.26495	5.26028	3.88812	4.71799	4.1711	4.60194	LOC104456987	uncharacterized LOC104456987
Eucgr.H02588	0	0	0	0	0.079628	0	24.9473	23.2544	28.25	58.3452	60.776	55.3278	LOC104414207	probable nucleoredoxin 1
Eucgr.I02743	406.708	344.481	407.156	222.154	193.329	169.537	266.759	261.869	259.617	194.617	211.469	199.202	LOC104419977	transmembrane 9 superfamily member 1
Eucgr.I02094	108.04	77.8182	94.6455	2.54597	4.56285	3.09359	21.3948	24.0292	20.3336	10.7079	10.8948	10.999	LOC104419471	zinc finger protein CONSTANS-LIKE 2
Eucgr.E02154	0	0	0	0	0	0	0	0	0	0	0	0
Eucgr.B02636	0.381805	0.318111	0.393067	0.359541	1.3923	0	6.8871	3.02287	3.5119	1.55553	1.81228	1.58743
Eucgr.D00869	0	0	0	0	0	0	0	0	0	0	0	0
Eucgr.C02360	0	0	0	0	0.048948	0	0	0	0	0	0	0
Eucgr.H02613	0	0	0	0	0	0	0	0	0	0	0	0	LOC104417053	receptor like protein 30
Eucgr.K02568	36.3152	38.4747	39.9741	31.1355	28.0765	21.2333	37.6152	30.498	27.9542	18.5626	16.7331	17.3786	LOC104426048	probable UDP-N-acetylglucosamine--peptide N-acetylglucosaminyltransferase SPINDLY
Eucgr.C00480	95.4418	60.1963	70.932	30.4241	34.8797	27.3615	35.2666	30.8017	37.039	24.8313	32.7544	23.4203	LOC104436177	protein OS-9 homolog
Eucgr.C03984	1.82035	2.03908	1.1651	0.542973	0.135207	0.423086	1.95482	2.11523	1.19535	0.110816	0	0.111961	LOC104438363	uncharacterized LOC104438363
Eucgr.J00657	456.513	453.703	456.207	323.988	332.751	258.569	283.638	253.135	251.03	354.23	369.315	357.893	LOC104421434	elongation factor 1-beta 1
Eucgr.J03089	10.3323	13.7815	12.3576	201.641	161.208	111.496	18.3858	13.5341	8.25708	194.478	195.293	197.552	LOC104423200	uncharacterized LOC104423200
Eucgr.H02705	0	0	0	0	0	0	0	0	0	0	0	0	LOC104417083	F-box protein CPR30
Eucgr.A02589	0	0	0	0.167622	0	0	0.129496	0	0	0	0.464094	0.253836
Eucgr.A02591	114.389	103.58	126.196	24.3336	21.8478	20.6635	83.523	84.8956	89.9021	21.0051	21.686	22.2811	LOC104446996	hypothetical protein
Eucgr.F03455	6.64249	10.9634	11.6021	3.36928	2.92397	2.46781	10.5022	7.46569	7.47027	2.06877	1.35748	1.4889
Eucgr.A01058	0.187304	0	0	0.741665	0.156996	0.888852	1.9725	0.95322	2.04686	3.68751	3.0033	2.44561	LOC104434835	cytochrome b561 and DOMON domain-containing protein At5g47530
Eucgr.D00630	2.20734	4.4176	4.03351	1.10303	1.80341	1.96687	8.51074	9.11405	12.6342	5.0747	5.00155	4.76701	LOC104441021	putative nuclear RNA export factor SDE5
Eucgr.F03436	0.646304	0.995783	0.674214	0.077262	0	0	0.099657	0.875521	0.080689	0.055288	0.05906	0	LOC104450216	TBC1 domain family member 17
Eucgr.F02292	0	0	0	0	0	0	0	0	0	0.026213	0.048746	0	LOC104451845	putative receptor protein kinase ZmPK1
Eucgr.G01663	0	0	0	0	0	0	0	0	0	0	0.068289	0
Eucgr.A01107	2.7922	2.27385	2.02413	9.82743	8.27103	5.6457	1.33641	1.73122	0.779071	10.1092	11.4391	11.859	LOC104435210	condensin complex subunit 2
Eucgr.I00310	51.8861	34.3875	47.1846	73.3819	81.5768	88.8257	36.1602	35.0284	29.3459	48.0748	49.9277	46.0337	LOC104418188	uncharacterized LOC104418188
Eucgr.J01287	0.333237	0.378963	0.641748	0.430137	0.546494	0.677815	1.16732	0.760046	0.842992	2.89014	2.67078	2.67201	LOC104423604	uncharacterized LOC104423604
Eucgr.G03353	9.5739	6.81071	9.10035	79.3687	88.4168	92.7787	29.2093	26.1146	23.0739	85.2092	89.6008	91.2073
Eucgr.E00277	107.449	135.156	98.2705	278.684	278.354	191.346	341.963	371.022	366.435	201.666	201.858	204.102	LOC104445939	transcription factor MYC2
Eucgr.F00461	28.8655	24.6183	26.4463	25.4352	26.2829	21.3079	32.0101	39.4098	36.8162	19.7946	20.6223	16.7099	LOC104448055	glutamyl-tRNA reductase 1, chloroplastic
Eucgr.H03252	3.2289	3.0199	3.06339	1.84479	1.92568	1.60861	1.39343	1.5175	1.92127	2.8321	3.34985	3.29054
Eucgr.D02220	79.658	61.2373	66.1781	27.8361	23.0185	10.1306	33.5753	38.3295	36.4878	40.0732	41.9432	38.2554	LOC104442040	probable calcium-binding protein CML17
Eucgr.B01092	0	0.147501	0	0	0	0	0	0	0	0	0	0.021606	LOC104424519	uncharacterized LOC104424519
Eucgr.E03178	0	0	0	0	0	0.427454	0	0	0	0	0	0
Eucgr.E00366	0	0	0	0	0	0	0	0	0	0	0	0
Eucgr.E00068	87.4876	58.2082	62.1962	48.3938	57.4218	52.2938	156.288	151.614	142.889	70.7646	64.9558	73.0319	LOC104443375	uncharacterized LOC104443375
Eucgr.B03827	86.955	133.249	107.331	78.5975	80.2506	81.2597	96.7641	79.8505	86.043	46.3352	45.9067	43.1346	LOC104433960	OTU domain-containing protein 5
Eucgr.A01401	2.83707	3.38421	3.51956	0	0	0.065832	2.00467	4.03871	2.93924	0.52784	0.109938	0.357083
Eucgr.E03244	12.001	11.7115	12.183	12.5226	9.73438	9.14926	13.6862	12.8176	13.96	14.4078	18.0274	18.0272	LOC104445241	uncharacterized LOC104445241
Eucgr.B00949	35.4327	36.1438	30.363	18.2825	8.49092	8.42876	24.6823	22.4271	27.1964	13.9634	14.1875	13.647	LOC104422997	protein C2-DOMAIN ABA-RELATED 4
Eucgr.E01269	0	0	0	0	0	0	0	0	0	0	0	0	LOC104446235	subtilisin-like protease SBT1.5
Eucgr.F02720	483.407	309.018	409.957	456.874	452.272	454.901	480.902	479.976	432.558	334.253	316.164	333.859	LOC104449613	U-box domain-containing protein 29
Eucgr.H03014	14.2476	12.2982	14.3703	11.1185	12.172	14.6292	9.49171	7.86566	6.7937	9.64111	9.61825	11.6951	LOC104414465	hypothetical protein
Eucgr.F00182	44.5278	40.8583	47.9555	54.225	43.976	46.4549	54.516	53.9863	54.397	40.9253	41.9186	38.6889	LOC104447864	F-box protein At1g47056
Eucgr.I00149	11.2467	9.91493	12.3588	6.6684	5.03917	4.27605	2.54438	2.18802	1.81923	2.01902	1.91942	1.29446
Eucgr.L00499	23.4896	24.1958	34.6322	244.75	271.633	200.765	49.8386	44.783	44.8467	80.2232	80.8041	81.9757	LOC104428541	calcium-dependent protein kinase 1
Eucgr.H02825	42.0241	46.2802	45.577	36.8371	35.6922	16.3537	17.9189	20.9559	20.0504	28.0386	27.4684	26.8117	LOC104417142	dihydroxy-acid dehydratase, chloroplastic
Eucgr.L00437	0	0	0	0	0	0.107078	0	0	0	0	0.042844	0
Eucgr.F02355	1.1245	0.701446	1.18724	13.3394	10.3566	4.96664	0.874719	1.44292	0.751702	14.0445	13.8025	15.859	LOC104449334	protein CYPRO4
Eucgr.H01996	0.227056	0.13085	0.505957	0.301553	0	0	0	0	0.104271	0.119801	0	0
Eucgr.G02896	68.9303	70.4212	67.963	53.8918	52.3532	39.141	81.1695	75.1099	83.2355	51.7659	53.7074	52.0865	LOC104455856	beta-hexosaminidase 1
Eucgr.G02194	52.4554	38.5634	48.4499	5.46073	7.0114	5.13399	38.6936	35.0417	43.1083	19.5231	20.0903	20.3829	LOC104453723	U-box domain-containing protein 11
Eucgr.L01602	3.17962	3.82209	3.75473	1.10643	1.41754	1.31123	6.09909	5.68702	5.77386	3.36696	3.79527	2.80169
Eucgr.L01687	0	0	0	0	0	0	0	0	0	0	0	0
Eucgr.C00515	0.805144	0.677584	0.397517	3.55951	1.91159	2.41498	0.718819	0.699376	0.671938	0.770373	1.08191	1.46685
Eucgr.J02568	20.1166	34.6706	26.7461	4.6408	5.47312	8.01191	17.6121	17.1038	21.7931	2.33802	1.33946	1.82855	LOC104422866	protein PIN-LIKES 3
Eucgr.F02357	180.753	235.713	213.046	44.9269	47.9889	42.5754	239.806	258.062	277.8	94.2895	94.6436	99.1911	LOC104449337	probable protein phosphatase 2C 12
Eucgr.D01864	4.7896	6.78446	6.13282	12.041	16.7786	12.6314	6.42786	8.95483	8.3414	18.5704	20.0868	19.7711	LOC104441764	serine racemase
Eucgr.C02185	0	1.37816	0.426398	13.5918	9.37829	13.0332	0.774024	2.81304	3.8018	29.8447	30.6774	30.9307	LOC104437310	serine carboxypeptidase-like 13
Eucgr.H04394	0.540752	0.2654	0.175602	0	0	0.491039	0	0	0	0.416887	0.319829	0.675818	LOC104415475	cysteine synthase
Eucgr.L00334	0	0	0	0	0	0	0	0	0	0	0	0
Eucgr.A01387	0	0	0	0	0	0	0	0	0	0	0	0
Eucgr.D02317	159.479	160.324	167.232	67.9678	59.2805	62.6075	122.952	112.735	123.186	44.492	46.8106	43.8929	LOC104442128	CAAX prenyl protease 1 homolog
Eucgr.K02911	0.464768	0.695483	1.00124	0	0.335148	0.110062	1.75799	1.62665	1.66596	3.82452	3.74374	4.16218	LOC104426325	uncharacterized LOC104426325
Eucgr.I02321	18.2178	17.4421	18.5094	4.53739	6.35255	7.04865	34.1085	29.7204	23.1652	37.2646	34.9104	38.6629	LOC104419632	SKP1-like protein 1B
Eucgr.F02171	7.35314	33.0372	12.438	13.8496	10.6524	3.53993	2.55043	3.11065	1.37934	9.38781	9.23129	9.22265	LOC104449203	transcription factor bHLH93
Eucgr.E00396	82.5756	92.4778	91.1908	183.778	232.032	260.137	113.198	90.8259	88.7012	180.532	174.626	174.857	LOC104443659	putative dual specificity protein phosphatase DSP8
Eucgr.H00111	50.6865	50.4556	53.032	17.3074	16.557	15.5596	42.3814	47.3826	43.6799	12.9281	12.3779	11.5837	LOC104456067	uncharacterized LOC104456067
Eucgr.I00229	0.355148	0.352649	0	0.554051	0.521998	0.585604	0	0	0	0.115038	0.635336	0.110766
Eucgr.J00767	47.1998	48.2541	48.6704	26.6877	28.7063	29.5743	77.1854	73.8212	61.9817	31.5577	34.191	31.7803	LOC104421516	armadillo repeat-containing protein 8
Eucgr.K01586	11.8191	7.75669	12.4641	52.9222	55.8917	43.6353	34.1373	31.4111	33.1381	27.8142	30.4054	30.2275	LOC104425341	triacylglycerol lipase SDP1
Eucgr.H03826	0	0	0	0	0	0	0	0	0	0	0	0	LOC104417483	disease resistance protein TAO1
Eucgr.L01484	9.82682	14.4466	14.5058	9.86349	11.6627	7.44363	11.4307	8.69602	8.74798	6.73191	7.84171	5.83224	LOC104429633	protein MON2 homolog
Eucgr.F01894	0.193998	0.393871	0.896018	0	0	0.211067	0	0	0	0	0	0	LOC104449022	putative S-adenosyl-L-methionine-dependent methyltransferase Mjls_1072
Eucgr.K02096	0.408831	0.602878	0.910794	0.422852	0.244007	0.897238	0	0.894259	0.659549	2.75862	1.05372	1.3867	LOC104425685	dCTP pyrophosphatase 1
Eucgr.F00937	0	0	0	0	0	0	0.121421	0.040098	0.07891	0	0.035499	0	LOC104451438	probable disease resistance protein At4g27220
Eucgr.F02642	4.13743	17.2226	4.94617	6.74568	6.64357	4.8642	3.60988	11.6459	14.5414	10.6832	13.1443	11.7817	LOC104449545	putative laccase-9
Eucgr.D02593	35.639	30.3738	35.2413	17.3236	19.069	18.4849	45.8784	55.7306	41.8068	28.949	26.9743	27.1812	LOC104442349	replication protein A 70 kDa DNA-binding subunit A
Eucgr.F00478	28.6817	15.2548	18.1733	145.733	167.884	207.612	41.7789	46.3234	41.0136	1465.69	1366.37	1424.41	LOC104448065	probable strigolactone esterase DAD2
Eucgr.L02595	1.50449	0.963999	2.15424	0.518329	0.105118	0.218188	0.461545	0.59422	0.176282	0.012349	0.158875	0.08763
Eucgr.D01054	45.4182	56.6709	62.3563	34.2086	36.5524	31.2659	12.0304	39.3285	36.3353	27.312	29.4365	30.2066	LOC104441262	protein BASIC PENTACYSTEINE6
Eucgr.L01785	0	0	0	0	0	0	0	0	0	0	0	0	LOC104429959	aluminum-activated malate transporter 2
Eucgr.G00214	0	0	0	0	0	0	0	0	0	0	0	0	LOC104454799	F-box protein DOR
Eucgr.L03184	0	0	0	0	0	0	0	0	0	0	0	0
Eucgr.J03102	38.5847	63.5269	49.7201	16.3772	14.213	14.4194	36.8827	34.371	38.3781	18.672	19.0971	19.329	LOC104423211	60S ribosomal protein L7-1
Eucgr.A01691	13.1274	5.2162	12.7833	0.05813	0	0	10.3605	9.69561	7.1535	0.094626	0.043992	0	LOC104439644	UDP-glycosyltransferase 86A1
Eucgr.J01063	9.10686	13.0616	11.0052	5.14255	6.17474	5.19147	9.61112	10.8572	9.23983	3.87024	5.20693	3.6992	LOC104421770	U11/U12 small nuclear ribonucleoprotein 59 kDa protein
Eucgr.H00017	0	0	0	0	0	0	0	0	0	0	0	0
Eucgr.A01671	3.21082	7.29636	4.63126	0.853134	2.16631	1.5078	2.2174	4.68734	2.92894	0.198015	0	0.671348
Eucgr.L03326	0	0	0	2.55374	4.45254	4.32349	0.165038	0.29702	0.497344	5.04963	5.52454	7.03827
Eucgr.G01004	4.16305	4.56388	4.7525	28.5261	35.5029	44.959	5.80976	5.45876	5.44656	18.9116	19.709	16.1718
Eucgr.F03796	33.8463	31.3995	32.1373	23.5412	19.5769	18.8574	32.982	32.4592	34.6923	18.743	18.5552	18.206	LOC104450512	delta-aminolevulinic acid dehydratase, chloroplastic
Eucgr.E00474	23.7345	30.0371	28.5415	46.6989	72.6649	92.6889	43.8295	37.4743	30.6979	55.2289	55.0084	52.494	LOC104443728	uncharacterized LOC104443728
Eucgr.J03081	26.8872	20.0432	25.5578	73.1445	54.1051	24.9208	29.0686	28.4006	26.1302	76.4019	76.855	78.2225
Eucgr.K02149	0	0	0.113133	0	0	0	0	0	0	0	0	0
Eucgr.H00065	4.67391	2.55977	3.04822	4.12809	3.95806	3.1846	4.95748	5.0225	5.14293	6.6547	6.96114	6.21945	LOC104416068	L-type lectin-domain containing receptor kinase IX.1
Eucgr.K02800	353.777	240.61	339.668	506.052	504.519	620.048	348.86	333.582	318.991	276.799	289.129	282.999	LOC104426227	protein NBR1 homolog
Eucgr.G01933	14.5732	17.3574	17.0867	10.5768	7.75666	7.76769	12.5694	11.8437	12.5564	11.5127	12.4096	9.89139	LOC104453525	sialyltransferase-like protein 1
Eucgr.F02360	0	0	0	0	0	0	0	0	0	0	0	0	LOC104451860	rust resistance kinase Lr10
Eucgr.L03000	0	0	0	0	0	0	0	0	0	0	0	0
Eucgr.B01578	60.2422	64.0494	64.346	151.922	178.917	229.279	87.2391	65.9122	75.8997	88.1704	88.6289	90.2219	LOC104428294	probable acyl-CoA dehydrogenase IBR3
Eucgr.B01345	0	0	0	0	0	0	0	0	0	0	0	0	LOC104426458	germin-like protein 5-1
Eucgr.A01777	2.85601	7.12536	5.53102	2.19804	3.19564	2.41417	2.62541	3.22384	3.62825	1.19501	1.17089	1.30188	LOC104456679	pentatricopeptide repeat-containing protein At1g11900
Eucgr.F00407	7.26462	5.68857	6.48692	19.2698	19.3211	14.5343	9.32281	6.5177	5.51533	27.8279	26.259	25.9726	LOC104448016	hypothetical protein
Eucgr.F03183	4.53294	2.84897	3.81263	2.15774	1.51758	1.34073	3.53968	2.34489	3.34851	2.15862	2.14769	2.16381	LOC104450020	pentatricopeptide repeat-containing protein At1g79080, chloroplastic
Eucgr.L00421	0	0	0	0	0	0	0	0	0	0	0	0
Eucgr.F01665	0.069573	0.03724	0.147159	0.327398	0.466501	0.175591	0.234179	0.061976	0.36852	0.438833	0.643664	0.375381
Eucgr.D00856	24.0975	26.108	28.8996	10.9728	21.21	26.8729	53.8193	42.836	56.3903	33.7721	35.6049	31.8102	LOC104441151	protein HEAT-STRESS-ASSOCIATED 32
Eucgr.J02950	20.9151	30.0301	24.7995	8.43195	6.75001	4.77699	21.1804	21.7241	22.0947	12.9008	13.1768	13.3531	LOC104423087	zinc phosphodiesterase ELAC protein 2
Eucgr.D02604	78.3785	89.5029	92.0957	34.9773	39.0712	32.8209	125.228	115.26	127.33	92.9823	97.6156	104.772	LOC104442362	MOB kinase activator-like 1A
Eucgr.B01097	0.376048	0.386837	0	0	0	0	0	0	0.544774	0	0	0
Eucgr.F02527	48.4932	73.1202	61.5669	16.7493	16.2894	12.0143	42.7738	34.8817	46.5143	35.5671	31.8484	33.1728	LOC104449450	uncharacterized LOC104449450
Eucgr.D00398	0	0	0	0	0	0	0	0	0	0	0	0
Eucgr.D00321	38.918	30.7964	16.6704	0.219104	0.723332	0.303107	95.2779	106.958	104.644	9.52092	11.6159	8.98488
Eucgr.H01121	2.05989	2.00855	3.05552	6.92527	6.67178	9.73503	10.2123	10.8566	9.11415	25.8075	24.417	23.7516	LOC104416425	cytochrome P450 89A2
Eucgr.C03534	0.333235	0.892374	0.552218	0	0	0	0	0	0	0	0	0
Eucgr.H04168	0	0.092045	0.251485	0.483546	0	0	0	0	0.538333	0.871764	0.126899	0.317288
Eucgr.G01959	9.76795	9.61975	10.678	6.83879	8.36315	20.8294	6.25233	7.08374	7.3049	6.31314	5.46763	5.28331	LOC104453545	acetylajmalan esterase
Eucgr.D02240	3.41998	2.55982	3.10374	2.18167	1.2797	0.961242	1.11757	1.54612	0.726348	1.34597	1.07736	1.47145	LOC104442060	U-box domain-containing protein 41
Eucgr.G02815	140.174	99.4899	130.371	141.482	175.483	190.215	100.201	100.941	89.3542	131.451	132.033	130.643	LOC104454203	uncharacterized LOC104454203
Eucgr.F02873	4.46371	6.89744	5.85958	4.65337	4.93101	3.01701	9.83013	7.43186	8.63534	4.6027	5.25612	3.76164	LOC104449733	kinesin light chain 3
Eucgr.E00949	0	0	0	0	0	0	0	0	0	0	0	0
Eucgr.H00013	0	0	0	0	0	0	0	0	0	0	0	0	LOC104416056	O-acyltransferase WSD1
Eucgr.C00066	23.801	26.4789	26.8258	18.3133	19.5866	13.4144	24.0935	20.6731	19.6836	18.6594	19.4377	18.5437	LOC104435888	DExH-box ATP-dependent RNA helicase DExH10
Eucgr.F00713	47.663	49.4069	53.5104	27.3411	21.5576	18.0007	48.0792	39.3923	48.9401	86.5763	75.3168	84.3076	LOC104448197	uncharacterized LOC104448197
Eucgr.B00934	0	0	0	0	0	0	0	0	0	0	0	0	LOC104422822	uncharacterized LOC104422822
Eucgr.I00610	1.96397	3.24432	2.99969	4.34734	2.32161	3.88471	4.60186	5.54677	5.24688	3.50828	3.05397	3.86309
Eucgr.H04153	6.60357	5.89184	7.77174	7.26171	9.79639	14.276	10.9463	10.778	9.77043	19.3375	20.6261	18.284	LOC104415321	rhomboid-like protein 14, mitochondrial
Eucgr.F00378	427.473	564.786	397.849	37.5652	28.2322	35.2591	254.901	306.724	325.955	7.83499	8.4592	6.70368	LOC104447992	homeobox-leucine zipper protein ATHB-6
Eucgr.F00320	9.38473	13.7792	13.7119	5.99852	5.51015	3.50518	8.2565	10.5565	10.5053	4.0603	5.41851	5.05819
Eucgr.A00175	0	0	0	0	0	0	0	0	0.425617	0	0	0	LOC108957996	major allergen Pru av 1-like
Eucgr.G01162	0	0	0	0	0	0	0	0	0	0	0	0	LOC104455215	putative receptor-like protein kinase At3g47110
Eucgr.F00700	0	0	0	0	0	0	0	0	0	0	0	0	LOC104451322	receptor-like protein 12
Eucgr.D00696	10.2299	15.8622	14.5953	17.6393	20.24	17.0001	17.8648	13.9732	14.4175	31.0572	27.1234	31.7709	LOC104441061	endonuclease 4
Eucgr.E02443	0	0	0	0	0	0	0	0	0	0.022942	0.057626	0.077293
Eucgr.G00741	0	0	0	0	0	0	0	0	0	0	0	0
Eucgr.F04348	3.27591	2.29774	3.55285	2.49388	2.40771	1.55245	3.00043	3.70005	3.29163	5.16509	4.57586	4.38697	LOC104450932	filament-like plant protein 1
Eucgr.L02502	15.8711	16.3094	17.0986	7.72602	8.72712	7.38322	13.0559	14.0031	12.4931	4.1907	4.51959	4.52385
Eucgr.H02599	1.30497	1.59932	1.76325	7.32372	7.18411	4.09205	0.831985	0.928962	1.03783	3.38306	4.19435	1.99823
Eucgr.E02414	58.0205	55.1195	65.4281	95.3791	107.871	81.3895	41.371	38.7929	36.6593	79.8719	82.4862	81.2265	LOC104444840	cullin-4
Eucgr.J01637	3.3524	3.93157	3.2046	3.21355	2.34457	1.45582	1.2832	1.20284	1.77921	1.57774	1.07835	1.17589	LOC104422200	NADH dehydrogenase [ubiquinone] iron-sulfur protein 1, mitochondrial
Eucgr.L02197	67.5456	58.5081	66.9467	697.162	629.907	599.431	297.357	275.919	241.128	1761.02	1669.61	1774.33
Eucgr.I00209	32.8747	31.5582	32.358	17.6436	16.0829	9.95336	34.0103	35.3752	36.6003	16.5057	17.9498	16.741	LOC104418126	BTB/POZ domain-containing protein At2g13690
Eucgr.D02313	10.439	7.21889	10.2879	10.736	8.43352	6.69368	6.65114	5.16444	6.19632	7.65381	7.23849	7.87036	LOC104442124	mechanosensitive ion channel protein 1, mitochondrial
Eucgr.L01026	0	0	0	0	0	0	0	0	0	0	0	0
Eucgr.K00281	69.1616	78.7627	71.5603	73.7517	79.9759	88.8353	52.5313	58.2184	59.2441	78.1404	77.7955	74.6341	LOC104426979	uncharacterized LOC104426979
Eucgr.H04250	3.61748	5.38001	3.82274	1.08255	1.72679	1.03526	5.99929	6.58655	7.60083	2.82684	3.34906	3.10191	LOC104415377	uncharacterized LOC104415377
Eucgr.A00652	0.675006	1.18287	1.1034	0.261944	0.967711	0.793715	2.60692	1.76623	2.15195	0.622752	0.514892	0.745174
Eucgr.K01373	0.218134	1.52653	0.350051	0.178037	0	0	0.43292	0.219286	0.371855	0.103159	0	0
Eucgr.J01163	543.998	646.737	559.489	352.338	293.837	208.74	461.812	544.255	516.572	646.164	671.477	676.497	LOC104421849	60S ribosomal protein L35
Eucgr.H01632	0	0	0	0	0	0	0	0.164292	0	0.24508	0.453778	0
Eucgr.I02794	20.446	25.3602	19.5526	18.2011	10.7757	7.92772	14.7083	11.5516	13.9315	10.8469	15.5423	11.7774	LOC104420028	NADPH-dependent pterin aldehyde reductase
Eucgr.L01228	0	0	0	0	0	0	2.19196	0.486295	3.95106	0	0	0
Eucgr.B00382	78.2491	84.7683	78.7869	46.048	39.9345	31.3191	56.5013	63.6552	59.4844	32.9734	32.7328	30.6066	LOC104418728	polynucleotide 5'-hydroxyl-kinase NOL9
Eucgr.E04325	0	0.325925	0	0.339633	0.683325	0.37293	0.375439	0.240713	0.609668	0	0.028838	0.206726
Eucgr.L00022	0	0	0	0	0	0	0	0	0	0	0	0
Eucgr.K01846	46.0931	44.5307	46.2349	36.6782	32.0244	37.9474	54.5998	51.2937	49.5912	22.6241	20.5515	21.5764
Eucgr.K02430	0	0	0	0	0.268172	0.216016	0	0.300392	0.125808	0	0	0	LOC104425940	probable pectinesterase 15
Eucgr.J02808	25.1981	18.4328	19.356	98.8461	43.3094	87.0373	31.7637	40.8824	36.1734	85.259	85.6647	86.9512	LOC104422980	cytochrome P450 71A1
Eucgr.J01857	0.303398	0.261277	0.289883	0.236751	0.235893	0.664861	0.096378	0.357351	0.248423	0.225672	0	0.2622	LOC104422348	laccase-13
Eucgr.L01628	1.7146	1.66173	1.79329	10.9136	5.65838	8.06212	13.9279	12.5553	15.3461	16.8115	15.9268	17.3397	LOC104429777	aspartyl protease family protein At5g10770
Eucgr.E03922	27.7175	17.7134	24.3174	21.2695	28.1812	19.0629	19.3786	21.538	18.4015	30.3847	27.6147	28.6558
Eucgr.E03567	0	0	0	0	0	0	0	0	0	0	0	0
Eucgr.K03218	3.02498	2.40211	2.82376	6.18805	7.78887	8.14628	18.7231	13.4152	15.2008	1.37079	1.07759	0.814973	LOC104427912	MLO-like protein 3
Eucgr.F00079	5.81432	7.0452	6.9293	6.60888	5.73669	1.89344	4.45138	5.04263	1.85496	7.29323	5.63732	7.73044	LOC104447783	mediator of RNA polymerase II transcription subunit 22b
Eucgr.K03453	0.552729	0.164275	0.545733	0	0	0	0.274442	0.246263	0.246608	0.053768	0.197828	0	LOC104426735	uncharacterized LOC104426735
Eucgr.F01296	1.46338	2.08401	1.31087	2.18956	1.69112	0.557064	11.4559	9.29106	11.5593	4.82382	5.66433	4.46252	LOC104448563	gamma-glutamyl hydrolase 2
Eucgr.C00645	12.4059	16.254	10.8102	12.3337	11.0019	6.95146	6.06978	6.94885	4.67697	10.5117	12.3609	10.7404	LOC104436297	GTP-binding protein At2g22870
Eucgr.K01223	6.63646	11.4437	8.49376	8.66271	12.6504	8.99015	12.0451	16.1019	14.7473	15.5296	16.1961	14.6968	LOC104425051	3-hydroxyisobutyryl-CoA hydrolase-like protein 5
Eucgr.G02320	12.6697	15.5105	15.1731	60.9818	51.8836	27.8241	14.552	11.9409	11.7856	70.9639	70.9837	65.9868	LOC104453795	uncharacterized LOC104453795
Eucgr.F00429	0.788209	0.851785	0.956538	0.039836	0	0	1.59034	1.91328	0.721289	0	0	0	LOC104448033	serine/threonine-protein kinase CTR1
Eucgr.K00565	3.04418	2.71214	3.24499	7.1664	10.5323	8.54006	7.46886	8.37118	7.18029	4.73117	6.38231	4.21862	LOC104424619	rust resistance kinase Lr10
Eucgr.I00447	7.94351	5.30504	9.45442	43.2643	24.1677	92.8851	0	0	0	0	0	0
Eucgr.C01067	0.311301	0.362834	0	0.548649	0.180832	0	0.112262	0.067112	0	0	0.392677	0.091796	LOC104436616	probable serine incorporator
Eucgr.B02191	5.16921	6.49333	6.2012	5.51827	4.32585	6.78957	1.96352	2.00081	1.33827	1.09923	1.04376	1.48351	LOC104432577	DEAD-box ATP-dependent RNA helicase 50
Eucgr.A00669	0	0.017236	0	0	0	0	0	0	0	0	0.018473	0.0552	LOC104453465	UPF0481 protein At3g47200
Eucgr.F04123	8.75024	7.55339	9.06125	9.90605	18.7782	17.7149	8.43396	8.25968	7.06964	20.9237	22.6993	17.5847	LOC104450771	uncharacterized LOC104450771
Eucgr.L01755	0.01428	0	0.217523	0	0	0	0	0	0	0	0	0
Eucgr.K03183	5.00517	3.98647	3.48532	19.4277	15.4331	24.1253	8.70724	7.36401	8.67686	32.5203	33.1461	33.4334	LOC104426512	protein ALUMINUM SENSITIVE 3
Eucgr.D02554	2.54242	2.67936	2.77829	2.86583	2.55296	3.06388	2.65707	2.62772	2.45497	2.0736	2.28456	2.0569	LOC104442315	pentatricopeptide repeat-containing protein At1g31790
Eucgr.F02698	3.9989	7.40487	4.80111	2.53414	2.36898	2.12073	7.59891	7.55148	7.59108	1.01861	1.45796	1.58413	LOC104449592	protein SET DOMAIN GROUP 41
Eucgr.K00680	0	0	0	0.057858	0.210417	0	0	0	0	0	0	0
Eucgr.A00881	41.0849	46.1009	46.8293	17.2572	16.0468	11.6759	26.4468	25.4997	28.5142	11.6954	12.0626	9.76563	LOC104433438	probable galacturonosyltransferase 7
Eucgr.L01372	0.78524	0.947994	0.478283	0	0	0.37466	0.359263	0.678912	0.299038	0.398971	0.211558	0
Eucgr.I00609	76.9207	109.242	49.9149	126.455	116.872	87.8866	68.7825	75.3163	78.2619	88.8369	90.9404	86.1221	LOC104418378	uncharacterized protein At5g65660
Eucgr.I01718	0	0	0	0	0	0.171005	0	0	0	0	0	0	LOC104420630	cytochrome P450 724B1-like
Eucgr.G01931	35.4824	30.2517	38.4772	68.8694	64.8148	57.2933	33.5415	30.2277	28.9111	38.6637	37.1861	38.2585	LOC104453524	alpha-mannosidase At3g26720-like
Eucgr.G03147	10.8279	23.912	17.595	1.46999	1.44993	1.36618	9.36368	8.90949	8.35046	4.14618	3.59699	2.80615
Eucgr.H01889	0	0	0	0	0	0	0	0	0	0	0	0
Eucgr.L00270	18.2524	16.2122	18.85	23.3957	28.0638	27.2256	9.19714	9.3229	8.60071	17.1353	16.0216	15.8609	LOC104428251	RNA pseudouridine synthase 1
Eucgr.K03574	11.3342	8.78055	11.5086	5.49007	5.54962	4.31177	7.27587	6.31206	7.19844	7.11928	7.32283	7.20952	LOC104426850	phytochrome C
Eucgr.G02173	0	0	0	0	0	0	0	0	0	0	0	0
Eucgr.B03532	49.1006	68.9644	88.4271	189.774	231.019	253.953	94.8683	108.857	127.634	266.01	271.633	273.22	LOC104433707	uncharacterized LOC104433707
Eucgr.I00992	0	0	0	0	0	0	0	0	0	0	0	0
Eucgr.L02464	0	0	0	0.698291	0	1.09061	0	0	0	0	0	0	LOC104430698	protein DETOXIFICATION 27
Eucgr.F00489	66.2251	46.8716	84.6009	23.2317	27.1253	26.8765	142.357	162.199	155.302	8.40761	9.89074	9.33077	LOC104448074	probable glucan 1,3-beta-glucosidase A
Eucgr.E02936	7.12479	11.6116	10.3316	4.65034	5.33052	4.1224	0.126792	0	0	0.418724	0.476087	0.39297	LOC104445115	TMV resistance protein N
Eucgr.F02646	0.133392	4.61854	0.53786	1.02757	0.654832	0.5425	1.78282	3.32417	6.22338	2.07081	2.2984	2.20826	LOC104449546	putative laccase-9
Eucgr.C01978	0.603061	0.433344	0.541847	0.545284	0.469701	0.888546	0.799853	0.254219	0.627809	1.84265	1.44406	1.03294	LOC104439470	chitotriosidase-1
Eucgr.K01998	3.372	5.38819	3.74391	2.43973	0.998259	1.29315	5.34548	3.73433	4.2656	2.35926	2.04569	2.42271	LOC104425611	short integuments 2, mitochondrial
Eucgr.E02234	0.263791	0.205572	0.245725	0.366188	0.593516	0.374426	0.038012	0	0.019301	0	0.022192	0.059468	LOC108959853	TMV resistance protein N-like
Eucgr.K02144	80.036	110.886	99.343	55.4179	50.6097	51.2837	57.711	50.8813	69.9991	52.2233	55.3497	49.2043	LOC104425718	uncharacterized LOC104425718
Eucgr.C03823	0	0	0	0	0	0	0	0	0	0	0	0	LOC104440340	uncharacterized LOC104440340
Eucgr.C01186	0	0.176732	0	0	0	0	0	0	0	0	0	0
Eucgr.C00044	0.344816	0.479773	0.224766	0.440553	0	0.151035	0.326818	0.423071	0.321439	0	0	0.362779
Eucgr.K03530	0.489536	0.335345	0.353427	0	0	0	0	0	0	0	0.196614	0
Eucgr.H03336	61.3776	108.246	63.291	0	0	0	25.794	56.4422	69.8669	0.135276	0.196377	0	LOC104417313	salicylate carboxymethyltransferase
Eucgr.E02035	0.21448	0.578268	0.034165	0	0.104485	0.107404	1.10665	0.293668	0.793251	0.17503	0.26657	0.172993
Eucgr.B01567	1.71648	1.75555	1.41441	4.92837	6.83855	6.91332	2.12015	2.32253	1.24071	53.2182	56.593	58.0726
Eucgr.B02605	1.92564	0.901743	2.13291	22.8017	19.3851	18.4767	26.2007	15.2818	15.2073	26.5759	27.1139	28.7498
Eucgr.E00330	76.1735	79.8461	67.6391	17.5452	24.6621	18.9652	71.3508	84.7643	98.9745	23.4799	24.5235	26.821	LOC104443598	beta-amylase 3, chloroplastic
Eucgr.F03262	0	0	0.153843	0	0	0.861183	0	0.027709	0	0.358647	0.315648	0	LOC104452061	uncharacterized LOC104452061
Eucgr.I02278	0.545695	0	0.874408	0	0	0	0	0	0	0	0	0
Eucgr.K02057	0	0	0	0.855696	0.958722	0	0.640124	2.21947	0.798511	0.60802	0.155785	0.708379
Eucgr.J02754	0	0	0	0	0	0	0	0	0	0	0	0	LOC104424095	uncharacterized LOC104424095
Eucgr.I00630	92.2738	115.722	97.4541	10.7033	15.017	25.6405	45.0785	52.592	52.3581	26.3834	27.3362	30.194	LOC104418396	cysteine-rich and transmembrane domain-containing protein A
Eucgr.F04306	0.515832	0	1.16303	0	0.369546	0.384937	0.385299	0	0.554823	0	0	0
Eucgr.D01350	0.224015	0.353116	0.378648	0	0.314085	0.319878	0.212394	0	0	0.35061	0	0.244665
Eucgr.J02529	0.07044	0.102118	0.074606	5.00827	6.232	1.94446	0.487487	0.141151	0.09278	6.70716	7.42126	9.33713	LOC104422835	G2/mitotic-specific cyclin-2
Eucgr.B01272	29.7927	33.3212	29.5557	22.0617	20.7464	22.8372	19.1121	18.3305	18.81	18.3405	18.9904	17.0005	LOC104425789	lipase
Eucgr.B03427	18.3265	16.78	16.7427	6.21169	6.65224	5.06628	8.37508	14.5611	9.20209	7.81557	8.32719	6.20199	LOC104435647	transcription factor TCP14
Eucgr.B03359	0.079155	0.131768	0.084683	0.460847	0.274341	0.069752	1.67445	1.27317	1.72281	1.18	1.12967	1.89837	LOC104433555	serine/threonine-protein kinase CDL1
Eucgr.F04246	0	0	0	0.050863	0.063004	0	0	0	0	0	0	0	LOC104450868	abscisic acid 8'-hydroxylase 3
Eucgr.F01756	10.9955	11.7626	13.1303	6.63148	6.07781	4.95726	8.4739	8.85882	9.97736	5.85127	5.00925	5.95409	LOC104448915	pentatricopeptide repeat-containing protein At1g76280
Eucgr.B03545	11.7991	10.8418	12.3549	172.307	105.202	97.3383	111.531	112.576	164.848	77.4491	73.7393	74.9028	LOC104433718	protein TIFY 9
Eucgr.G00966	4.82082	1.39246	3.18096	2.74276	5.94738	2.72424	9.99398	29.0972	15.4066	27.4687	25.3699	27.7152	LOC104452909	fibronectin-binding protein A
Eucgr.F03308	0.196655	0.477642	0.105124	2.10108	1.6168	0.912452	0.372285	0.330729	0.298137	1.74661	1.35389	1.90797
Eucgr.J01071	0.012076	0.144922	0.603053	0.146184	0.661853	0.670905	0	0.300966	0.247193	0.033315	0.506156	0.143285
Eucgr.K00574	10.5066	11.3796	12.3328	18.981	21.4417	20.8297	7.00615	6.68587	7.35289	15.5888	17.0619	18.3827	LOC104424628	two-pore potassium channel 5
Eucgr.K02895	0.075226	0.104391	0.257496	0	0.06919	0	1.59969	1.26659	0.508638	0.243775	0.200929	0.291433	LOC104426314	uncharacterized LOC104426314
Eucgr.L02702	0	0	0	0	0	0	0	0	0	0	0	0
Eucgr.J01907	135.435	115.78	131.944	105.048	127.381	126.191	100.089	106.255	93.2393	102.997	103.921	102.648
Eucgr.L01094	355.9	189.613	304.427	120.996	110.154	128.248	155.574	194.507	172.325	22.1506	23.4853	20.8078	LOC104429191	putative receptor protein kinase ZmPK1
Eucgr.F00132	0.11931	0.362824	0.437556	0.06413	0.335286	0.239729	0.07904	0	0.301583	0.221817	0.54749	0.338191	LOC104451120	pumilio homolog 12
Eucgr.H03560	10.6908	20.6477	12.8996	6.05374	4.81695	2.13888	8.50308	7.18782	7.03232	4.88665	4.47555	4.57732	LOC104414870	putative methyltransferase C9orf114
Eucgr.B01489	0	0	0	0	0	0	0	0	0	0	0	0
Eucgr.A01394	0	0	0	0	0	0	0	0	0	0	0	0
Eucgr.F02263	0.531592	1.10008	0.898124	5.53854	4.39247	3.41892	6.77029	5.4146	5.47848	3.26361	2.51477	2.95437	LOC104449273	QWRF motif-containing protein 2
Eucgr.C02633	0.832476	0.747165	0.566205	1.97598	1.94108	1.59603	0.252872	0.077183	0.073507	0.096554	0.178653	0.194777	LOC104437580	disease resistance protein RPP4
Eucgr.E01253	1.98678	1.29165	2.31841	5.46019	5.71359	4.4472	14.8344	16.4841	22.0526	18.7564	18.7747	19.9774	LOC104444251	isoflavone reductase homolog
Eucgr.E03572	0	0	0	0	0	0	0	0	0	0	0	0	LOC104447375	(3S,6E)-nerolidol synthase 1
Eucgr.D00369	0	0	0	0	0	0	0	0	0	0	0	0
Eucgr.K02228	7.39367	7.51807	10.1904	7.56706	6.60158	7.69492	6.26064	4.3989	6.09873	4.02052	4.55692	4.06896	LOC104425793	uncharacterized LOC104425793
Eucgr.A02214	0	0	0	0	0	0	0	0	0	0	0	0	LOC104414326	serine carboxypeptidase-like 45
Eucgr.L00943	1.08813	1.15491	0.806589	0.351079	0.659441	0	0.71761	0.91723	1.0176	0.749246	0.50463	0.496927
Eucgr.F00512	0	0	0	0	0	0	0	0.052515	0	0.073742	0.091727	0	LOC104451246	receptor-like protein 12
Eucgr.K02256	0	0	0	0	0	0	0	0	0	0	0	0	LOC104427649	probable S-adenosylmethionine-dependent methyltransferase At5g38100
Eucgr.F03346	0.330403	0.754134	0.216306	0	0	0	0	0.64062	0.354493	0	0	0	LOC104450153	uncharacterized LOC104450153
Eucgr.K02302	9.78537	12.471	10.6225	2.55886	9.01779	13.3345	10.3492	9.58994	9.50669	15.0101	14.4559	12.9698	LOC104425863	protein REVEILLE 7
Eucgr.G01782	98.7054	117.477	100.957	12.8969	18.641	20.2566	262.146	317.548	320.785	17.5276	18.9713	16.8347	LOC104453432	uncharacterized LOC104453432
Eucgr.G00095	0.721738	0.419839	1.53604	2.09006	4.96703	0.689385	0.296929	0	0.460036	2.06898	0.974246	2.08533
Eucgr.B03025	10.8519	8.23853	12.4221	0	0.10773	0.112369	17.8111	2.78074	3.57675	0.175121	0.164197	0.580456
Eucgr.C03163	0	0	0	0	0	0	0	0	0	0	0	0
Eucgr.B01571	7.23845	8.23612	7.21964	6.30092	7.01235	8.18825	5.20271	6.47663	5.95812	8.859	11.0501	9.4666	LOC104428230	glycine, alanine and asparagine-rich protein
Eucgr.D00857	0.829903	0.690837	0.916804	0	0.082987	0.259973	0.107552	0.018286	0.869456	1.12824	1.42902	2.06456	LOC104441152	uncharacterized LOC104441152
Eucgr.K00571	0	0	0	0	0	0	0	0	0	0	0	0
Eucgr.L03367	0.150451	0.218113	0.160421	0.343241	0	0	6.0194	10.3241	11.9634	0.784323	0.976792	0.723683
Eucgr.G01355	0	0	0	0	0	0	0	0	0	0	0	0	LOC104455295	uncharacterized LOC104455295
Eucgr.D01002	0	0	0	0	0	0	0	0	0	0	0	0
Eucgr.K01803	44.5179	38.5583	42.5673	20.6036	22.8377	22.9902	36.1412	32.4293	29.8909	26.2982	27.1236	26.5214
Eucgr.G03271	122.699	153.718	150.394	45.3954	50.4848	47.3905	200.616	155.466	167.892	46.3966	47.5712	46.2782	LOC104454574	probable glycerol-3-phosphate dehydrogenase [NAD(+)] 1, cytosolic
Eucgr.I01054	6.54718	9.36666	9.235	6.30831	7.61341	7.43946	13.2168	9.43841	9.83666	7.99895	9.18625	7.70271	LOC104418654	ERC protein 2
Eucgr.G02631	0	0	0	0	0.097115	0	0	0	0	0	0.076037	0	LOC104455777	protein ZINC INDUCED FACILITATOR-LIKE 1
Eucgr.H00126	5.15295	6.34455	5.9966	0	0	0.102413	3.41319	4.46793	4.89171	0.119636	0.37487	0.122775	LOC104456075	uncharacterized LOC104456075
Eucgr.J00830	0.59365	1.17295	1.36273	0.583061	0.335302	0.140116	0	0	0.139638	0	0	0
Eucgr.I02784	57.5891	60.4806	59.1875	47.3248	50.9559	45.0585	97.8802	89.9359	104.035	105.513	100.862	107.627	LOC104420016	ras-related protein RABA2a
Eucgr.A01007	1.03974	0.685338	1.09981	5.8745	5.05616	4.84564	2.28548	2.59943	3.43112	0.557824	0.659561	0.823047	LOC104434397	ABC transporter B family member 11
Eucgr.D00136	0	0	0	0	0	0	0	0	0	0	0	0
Eucgr.L03513	1.65951	5.96377	4.67997	4.7209	5.03573	1.78968	3.55361	3.48411	3.87075	15.0105	11.9345	11.7684
Eucgr.E01120	2.79597	2.73143	3.50537	1.91355	1.90408	1.79731	6.05037	4.29625	5.0087	4.36067	3.77723	3.97002	LOC104444166	short-chain dehydrogenase TIC 32, chloroplastic
Eucgr.B03571	946.225	782.885	951.616	355.284	331.182	369.618	440.851	519.339	509.846	337.675	340.401	338.539
Eucgr.C01979	0	0	0	0	0	0	0	0.286589	0	0.38539	0.232306	0.06862	LOC104437160	acidic mammalian chitinase
Eucgr.H03055	2.30227	2.55581	2.45638	1.05109	1.21745	0.621006	3.34064	3.41028	3.17762	3.99055	3.32183	4.33655	LOC104414493	F-box/kelch-repeat protein At1g57790
Eucgr.D02133	8.27611	8.49242	7.03736	23.6712	16.9173	10.8592	10.8497	12.6195	10.3956	26.1944	25.1616	22.4895	LOC104441965	(S)-ureidoglycine aminohydrolase
Eucgr.C02196	6.48707	8.43122	6.04178	0.978432	1.21479	1.31401	0.559807	0.390607	0.922589	0.631339	0.682475	0.362612	LOC104437316	sodium transporter HKT1
Eucgr.H01990	20.877	18.0015	21.9154	21.0928	17.8272	11.2788	61.9229	47.2228	61.4345	24.4825	21.7739	24.483	LOC104457258	dof zinc finger protein DOF5.6
Eucgr.E00931	0.281939	0.526156	0.295677	0	0	0	0	0	0	0	0	0
Eucgr.A02895	0.031192	0.090742	0.066963	7.53964	7.55969	3.93135	0.559996	0.70561	0.570701	12.6102	13.2235	12.581	LOC104449753	structural maintenance of chromosomes protein 2-1
Eucgr.B03030	4.48704	5.70935	7.30177	22.1674	26.5928	30.6253	5.77066	3.75294	3.35012	14.6723	13.2042	12.6796	LOC104433287	uncharacterized LOC104433287
Eucgr.D02186	6.03612	0.945096	6.47023	81.7085	66.1843	54.9216	7.88426	3.91346	3.18895	35.1085	32.506	34.6691	LOC104442010	protein LOL1
Eucgr.J02117	304.27	287.762	297.42	185.068	181.222	203.022	205.269	215.692	179.669	147.906	155.058	136.268
Eucgr.K00622	0	0	0	0.996951	0.792831	1.53723	0.156022	0.217703	0.12328	0.622948	0.619758	0.675764	LOC104427099	LRR receptor-like serine/threonine-protein kinase GSO2
Eucgr.C01515	0.260192	0	0.312124	0	0	0	0.630682	1.87837	1.81863	0	0.114642	0.114123	LOC104436916	axial regulator YABBY 5
Eucgr.A02717	40.1793	48.5216	47.4019	83.4591	78.9131	58.4718	48.4168	45.085	52.5526	114.914	116.663	112.866	LOC104448157	probable NADH dehydrogenase [ubiquinone] 1 alpha subcomplex subunit 5, mitochondrial
Eucgr.D00247	31.4188	39.9867	31.5426	10.211	15.084	9.28249	19.0281	15.1684	21.3139	13.3304	20.8171	18.8076	LOC104440749	mediator of RNA polymerase II transcription subunit 19a
Eucgr.H01787	0	0	0	0	0	0	0	0	0	0	0	0
Eucgr.F01979	53.5865	44.3321	52.1641	68.1541	63.4553	66.8085	57.5076	56.3765	55.5347	45.9727	47.3241	43.3905	LOC104449062	peroxisome biogenesis protein 5
Eucgr.D02258	17.9547	12.3576	16.0449	17.2841	36.8997	46.1519	31.3324	30.3702	25.244	129.45	129.11	126.731	LOC104442076	(+)-neomenthol dehydrogenase
Eucgr.D00860	0	0	0	0	0	0	0	0	0	0	0	0
Eucgr.B01999	14.1738	6.97623	10.8779	101.905	90.566	78.1837	23.7094	22.8427	19.5986	202.661	211.615	209.457	LOC104432338	E3 ubiquitin-protein ligase ATL6
Eucgr.K02569	28.818	29.4696	26.8081	17.9693	18.7698	12.5788	24.8753	15.9311	19.1132	35.9187	32.1759	36.1347	LOC104426049	peptidyl-prolyl cis-trans isomerase CYP18-2
Eucgr.F03249	1.20646	1.34085	1.50503	1.01193	1.44082	1.04703	1.50023	1.03578	1.49024	1.79947	1.45765	1.77076	LOC104452057	uncharacterized protein ycf45
Eucgr.H03858	32.4392	42.8388	39.2525	11.7813	10.958	9.20164	32.5818	32.3891	31.405	2.6775	2.05757	2.75058	LOC104415090	cell division control protein 48 homolog C
Eucgr.E03588	0.061398	0.118284	0.770756	0	0.130807	0.147314	0.108722	0.138954	0.293675	0	0	0.173653
Eucgr.L02422	1.46186	1.145	0.641082	0.25071	0.515285	0.985362	0	0	0	0	0	0
Eucgr.B03937	0.86649	2.04982	1.47938	0.284751	0.114096	0	0.52408	0.862923	0.479621	0	0	0.120514	LOC104434058	xyloglucan endotransglucosylase/hydrolase protein 31
Eucgr.A00921	0	0	0	0	0	0	0	0	0	0	0	0
Eucgr.A01641	0.340816	0.881853	0.303706	0.291025	0	0	1.20627	2.56062	1.09761	0	0	0.091941	LOC104439177	geraniol 8-hydroxylase
Eucgr.H00974	0	0	0.095777	12.2007	14.0762	14.2668	2.13805	2.89503	1.64791	4.70059	4.81601	5.06629	LOC104456660	thaumatin-like protein 1b
Eucgr.H01109	7.16634	10.4211	7.13997	8.49645	6.88985	6.3132	5.93279	5.10101	6.61747	8.16547	6.90438	5.72468	LOC104456750	outer envelope pore protein 16-4, chloroplastic
Eucgr.J01578	0	0	0	0	0	0	0	0	0	0	0	0
Eucgr.C03151	0	0	0	1.48829	2.43489	2.86115	0	0	0	0.77085	0.778932	1.48496	LOC104437927	myb-related protein 308
Eucgr.L01669	0.456425	0	0.445936	0.52829	0.993992	0.910959	0	0	0	0	0	0	LOC104429833	rust resistance kinase Lr10
Eucgr.L00075	0	0	0	0	0	0	0.965142	0.419822	0.403867	2.68159	4.07873	3.05875
Eucgr.H01247	0	0	0	0	0	0	0	0	0.070769	0	0	0.066007	LOC104456855	anthocyanidin 3-O-glucosyltransferase 5
Eucgr.H03073	60.4998	78.9086	64.5434	57.5184	56.8527	43.7265	42.9042	35.3608	41.369	56.0371	59.7983	60.5828	LOC104414517	PITH domain-containing protein 1
Eucgr.I00301	94.1508	102.881	124.076	81.0899	98.4616	78.451	62.4447	62.397	65.8711	89.2826	87.0694	95.1498	LOC104418185	26S proteasome non-ATPase regulatory subunit 6
Eucgr.H03821	0	0	0	0	0	0	0	0	0	0	0	0	LOC104417477	uncharacterized LOC104417477
Eucgr.I00580	22.0296	13.9898	10.2491	0.428491	0.067747	0.260287	35.3387	39.791	28.8348	2.31521	2.37668	1.92518	LOC104418352	serine hydroxymethyltransferase, mitochondrial
Eucgr.F00492	0.071791	0.104428	0.230674	7.73555	4.44438	3.05926	5.10095	3.61418	4.98849	2.1477	2.42209	2.15374	LOC104448077	cytochrome P450 87A3
Eucgr.K00037	1.58055	0.627871	1.12804	4.47688	6.30795	4.6678	1.01494	1.30824	1.5426	3.44256	4.35462	6.08432
Eucgr.G02293	0	0	0	0.141339	0	0	0.244444	0.124545	0	1.49868	1.16349	0.708363
Eucgr.E03445	9.87831	7.03005	10.1062	26.8037	24.3197	17.4244	11.0885	8.22845	7.53372	21.5677	21.365	21.751	LOC104445349	bifunctional fucokinase/fucose pyrophosphorylase
Eucgr.I02523	0.796396	0.38571	0.844442	0	0	0	0	0	0	0	0	0	LOC104419821	uncharacterized LOC104419821
Eucgr.B03999	20.5992	19.8935	19.8348	7.10313	7.35146	9.40365	13.8387	16.9965	13.4766	11.254	11.518	13.8464	LOC104434115	protein bfr2
Eucgr.H00708	0.790678	1.20605	1.74595	0.396465	0.468872	0	1.93855	1.26156	0.964593	2.70359	1.89438	2.35217	LOC104416292	uncharacterized LOC104416292
Eucgr.H04628	0.152398	0.111396	0.202643	0.23395	0.499715	0.138892	0.475606	0.19331	0.536572	0	0.890526	0.110389	LOC104415671	nuclear transport factor 2-like
Eucgr.B02067	1.06056	1.61479	0.747264	1.58471	0.304684	0.478716	0.192192	0.094904	0	0	0	0.096132
Eucgr.E01507	28.5408	42.7894	37.7263	14.6235	12.8108	10.4636	34.7142	37.7903	31.172	7.77602	7.81278	7.81692	LOC104444410	uncharacterized LOC104444410
Eucgr.I01959	517.452	832.084	580.328	528.841	513.881	583.322	520.027	620.98	643.912	296.044	300.372	296.377	LOC104419372	cystathionine gamma-synthase 1, chloroplastic
Eucgr.K02967	23.868	31.4223	30.2252	21.4665	21.5432	20.3353	16.0153	16.9954	16.205	20.0978	20.5258	21.7153	LOC104426366	BAG family molecular chaperone regulator 4
Eucgr.H04620	54.7809	26.5686	43.8321	98.0912	107.152	100.813	23.9186	28.664	21.4938	62.4607	67.1336	64.2722	LOC104415667	uncharacterized LOC104415667
Eucgr.E04185	0	0.063102	0	0	0	0	0	0	0	0	0	0	LOC104447662	cysteine-rich receptor-like protein kinase 25
Eucgr.H00098	0.267497	0.220782	0.262413	0.319378	0.352031	0.331788	0.274784	0.248807	0.201833	1.47307	1.11046	1.48043	LOC104456061	uncharacterized LOC104456061
Eucgr.C00196	73.7169	80.684	70.3142	48.5965	50.0905	38.2293	118.167	94.0507	103.712	34.8354	35.6745	33.6018	LOC104435986	diacylglycerol kinase 4
Eucgr.J01139	2.02954	0.851868	2.48151	2.90948	1.4369	0.543676	0.976	0.955542	0.639457	2.63393	4.01895	3.9435	LOC104421828	serine/threonine-protein kinase CDL1
Eucgr.H05067	1.05652	0.536382	1.06455	6.48085	5.59681	5.36835	2.02322	2.11818	1.44289	7.57208	8.04321	6.97895	LOC104415962	ammonium transporter 3 member 1
Eucgr.I00515	0	0	0	0	0	0	0	0.16572	0	0	0	0
Eucgr.C01109	42.3392	45.0437	43.869	50.8351	54.086	50.1659	52.4665	25.3104	29.9762	33.9926	35.42	35.4551
Eucgr.F01595	0	0	0.075011	1.61576	1.74757	0.509292	0.602686	2.92546	1.3386	0.906032	1.11169	1.19107	LOC104448782	phosphatidylinositol/phosphatidylcholine transfer protein SFH6
Eucgr.E00527	0.848798	0.309504	0.892653	0	0	0	1.81255	2.521	2.74803	0	0	0	LOC104445995	uncharacterized LOC104445995
Eucgr.I01289	211.766	328.539	234.731	45.8326	46.8844	38.4377	182.231	200.333	240.155	23.9426	21.403	21.1505	LOC104418851	bZIP transcription factor 11-like
Eucgr.I01801	5.39385	16.9585	10.3524	1.99732	5.49266	3.34944	11.2119	22.6429	25.1098	11.7132	12.1156	14.0093	LOC104419267	2-methylene-furan-3-one reductase
Eucgr.K00447	0	0.212905	0	6.28151	4.81986	5.42196	3.42191	3.79605	4.45781	63.2868	63.2765	61.5537
Eucgr.C01093	0	0	0	0	0	0	0	0	0	0.252333	0.278142	0.122492	LOC104439097	probable 2-oxoglutarate-dependent dioxygenase AOP1
Eucgr.G01550	8.85764	12.8492	10.387	4.76812	4.54053	3.82455	2.94701	2.46775	1.78178	5.57283	5.11756	4.90085	LOC104453254	protein NTM1-like 9
Eucgr.F03613	79.9219	85.9083	76.95	80.013	88.3972	109.804	119.883	101.124	93.3265	102.104	100.089	98.1914	LOC104450357	splicing factor U2af small subunit B
Eucgr.I01312	1.1747	2.11346	1.36651	0.445362	0.333615	0	1.94585	1.19075	1.73292	0.23133	0.33246	0.229737	LOC104418871	xylulose kinase
Eucgr.K01644	67.7502	85.0795	81.9985	8.5557	9.33	6.59206	46.5998	48.4287	45.6017	28.2819	28.3253	28.9661	LOC104425373	pentatricopeptide repeat-containing protein At1g80270, mitochondrial
Eucgr.D01939	15.8873	28.735	17.8163	13.5346	10.5387	8.92444	10.11	9.34115	8.37284	9.66933	9.21455	6.32924	LOC104441818	agamous-like MADS-box protein AGL19
Eucgr.I02450	22.9938	25.2895	22.7343	5.96654	3.29434	3.901	27.6977	11.3071	24.4913	8.66808	5.86199	5.9105	LOC108955389	uncharacterized LOC108955389
Eucgr.B03429	8.69299	9.43145	10.4249	15.9303	16.8666	14.4741	12.0222	10.1632	10.5209	24.8292	26.0493	26.0996	LOC104433619	probable ran guanine nucleotide release factor
Eucgr.B02174	1.72656	2.71529	2.00823	0.375888	0.605394	0	1.2077	2.13682	1.91048	0.839541	0.600659	0.998048	LOC104432566	uncharacterized LOC104432566
Eucgr.F03922	97.6651	104.223	115.264	37.7145	35.9602	27.701	51.6754	53.6941	53.2808	29.0875	32.6334	32.0498	LOC104450601	uncharacterized GTP-binding protein YjiA
Eucgr.K00693	0	0	0	0	0	0	0	0	0	0	0	0	LOC104427134	serine/threonine-protein phosphatase 6 regulatory ankyrin repeat subunit B
Eucgr.B00758	0.047539	0	0	0.207999	0	0.328613	0	0	0	0	0	0
Eucgr.C00149	3.08093	7.96585	5.56711	0.760765	0.284727	0.295997	2.12066	4.49613	2.4698	0.808364	0.685183	0.965716	LOC104435952	probable receptor-like serine/threonine-protein kinase At5g57670
Eucgr.B00853	55.8042	67.5629	60.304	43.5974	47.3683	33.679	47.5226	47.0385	40.0788	42.6325	45.1491	46.307	LOC104422015	pre-mRNA-splicing factor SPF27 homolog
Eucgr.E03688	0.045516	0	0.101987	0.249003	0.279469	0.093055	0.159422	0.147923	0.178081	0.18268	0.093882	0.133581
Eucgr.K02684	0.238984	0.581032	0.208387	0	0	0	0	0	0	0	0	0	LOC104426131	bidirectional sugar transporter SWEET12
Eucgr.L02993	0.131638	0.080773	0.216823	0.260985	1.01222	0.423034	0.220524	0.078945	0.104787	0.374983	0.400086	0.400709
Eucgr.F01035	0.716453	0.540685	0.450691	2.64343	2.63395	2.28804	0.668048	0.682854	0.564822	0.199285	0.359013	0.149203
Eucgr.K01619	7.6885	3.38306	5.78773	0.224996	0.389484	0.352717	3.60773	5.38443	4.68924	4.49122	4.41369	4.95754
Eucgr.F03599	0.173656	0.234743	0.232076	5.36327	7.32234	8.01532	1.94108	3.91998	3.18774	5.76687	7.02418	5.80129	LOC104450343	7-deoxyloganetin glucosyltransferase
Eucgr.H00089	30.9601	34.1725	34.8499	18.9102	20.895	19.9325	26.1955	28.2238	22.8792	13.4371	13.322	12.2175	LOC104456055	uncharacterized LOC104456055
Eucgr.H04330	0	0	0	0	0	0	0	0	0	0	0.034588	0	LOC104417643	pentatricopeptide repeat-containing protein At1g62910
Eucgr.B01047	0	0	0	0	0	0	0	0	0	0	0	0
Eucgr.C00289	0	0	0	0	0	0	2.16373	2.00522	1.02356	0.403915	0.519158	0.288496
Eucgr.E03813	0	0	0	0	0	0	0	0	0	0	0	0	LOC104447505	protein ACCELERATED CELL DEATH 6
Eucgr.C01106	6.9363	4.68058	3.44524	282.145	304.617	256.557	4.69888	5.54005	5.60968	66.0861	62.325	58.9366
Eucgr.E04109	0	0	0	0	0	0	0	0	0	0	0	0	LOC104447614	COBRA-like protein 10
Eucgr.H03703	0.327556	0.252494	0.545103	1.53543	1.20485	1.90378	44.5169	38.8195	39.893	19.8966	18.3404	18.7809
Eucgr.F02061	57.6893	60.5561	55.2864	35.7658	27.4342	22.8912	19.9548	29.963	26.1522	22.5245	24.0708	22.2991	LOC104449134	uncharacterized LOC104449134
Eucgr.J02118	14.3193	11.3982	13.2146	13.1442	16.3623	23.549	113.966	87.8104	89.8844	61.3024	68.9352	71.1611
Eucgr.F03161	160.613	179.848	162.386	54.9951	51.8865	61.0425	141.088	136.878	147.304	56.5222	59.7073	59.3563	LOC104449999	dihydrolipoyllysine-residue acetyltransferase component 2 of pyruvate dehydrogenase complex, mitochondrial
Eucgr.C01970	0.110274	0	0.014698	0	0	0	5.33592	3.73242	4.80915	4.70232	4.84873	3.40645	LOC104437157	TMV resistance protein N-like
Eucgr.K00520	0	0	0	0	0	0	0	0	0.067752	0	0	0	LOC104427060	rust resistance kinase Lr10
Eucgr.H03592	62.5197	88.7756	94.869	58.4978	44.7609	17.5152	18.5463	25.7999	18.5276	32.4038	30.6511	29.9179	LOC104414890	uncharacterized protein DDB_G0283357
Eucgr.L02279	1.76864	0.841251	1.3161	1.12304	0.792507	1.16233	0.406069	1.20604	0.419851	0.304733	0.283206	0.263855
Eucgr.B03042	49.8473	49.7038	51.3342	25.3879	25.1737	33.9513	62.034	44.6548	56.382	35.8435	45.9591	42.4141	LOC104433296	uncharacterized LOC104433296
Eucgr.E03349	260.097	280.596	269.384	149.525	168.58	168.285	208.398	205.318	207.467	165.08	161.438	164.427	LOC104445304	clathrin light chain 2
Eucgr.A02888	1.27254	4.85199	2.22699	2.35496	3.55242	3.27524	7.75885	7.83069	14.3823	2.79644	2.94978	3.18075	LOC104449672	beta-fructofuranosidase, soluble isoenzyme I
Eucgr.J02139	19.5036	14.1563	21.1389	37.3486	30.9093	31.2949	15.7313	11.4187	9.12051	19.0811	19.1043	18.2762	LOC104422558	uncharacterized LOC104422558
Eucgr.E01952	5.47305	11.5054	6.60265	18.3267	20.2708	17.282	7.71657	6.38119	8.09754	10.1483	11.4911	13.8544	LOC104444629	calmodulin-binding protein 60 D
Eucgr.F01957	0	0	0	0	0	0	0	0	0	0	0	0
Eucgr.E00541	0	0	0	0	0	0	0	0	0	0	0	0	LOC104446000	NAC transcription factor 56
Eucgr.H03282	42.3435	69.8104	52.9973	16.921	21.1044	22.9389	51.1458	38.3769	42.1091	23.9891	23.742	23.8778	LOC104414661	zinc finger matrin-type protein 2
Eucgr.C03771	1.03186	0.750017	2.36826	0.402985	0.415577	0.455885	1.43957	1.71369	1.53574	0.467176	0.367495	0.229235
Eucgr.C00478	0	0	0	0	0	0	0.530462	0	0.514672	0	0	0	LOC104438880	uncharacterized LOC104438880
Eucgr.C00545	0	0	0	0	0	0	0	0	0	0	0	0
Eucgr.G01290	0.395759	0.38571	0.872337	0	0.38379	0	0.522541	0.578378	0.490068	0.787407	0.496238	0
Eucgr.I00361	0	0	0	0.132624	0	0	2.05579	2.57252	1.82915	0.950243	0.859096	1.24205	LOC104418225	L-ascorbate oxidase
Eucgr.I01173	24.026	30.3114	31.1044	5.52739	3.89592	4.07021	13.2999	14.6756	15.3091	8.49604	8.89362	9.30836
Eucgr.H00846	0.698438	1.42491	1.1622	0.970616	1.79644	2.09033	7.27026	3.68114	4.39125	1.99146	2.06472	2.09257	LOC104456581	5-dehydro-2-deoxygluconokinase
Eucgr.H01973	2.18347	1.51239	2.33737	0.30307	1.57214	1.15933	2.25155	4.02732	3.2439	6.95249	5.87742	5.71465	LOC104457251	probable esterase PIR7A
Eucgr.F01049	0.341406	0.131985	0.097345	5.98975	4.86311	4.24253	0.804599	0.935417	0.679118	1.32452	1.86466	1.18847
Eucgr.L01254	5.0714	11.7674	10.7876	278.734	362.406	387.455	36.4903	34.2565	36.0579	134.402	129.826	128.624	LOC104429358	bZIP transcription factor 53
Eucgr.J01159	14.8458	8.90739	17.6347	0	0.065987	0	21.0517	34.8002	30.503	0.158612	0.291187	0.166513	LOC104421845	3-ketoacyl-CoA synthase 19
Eucgr.K02504	37.5074	45.5374	43.4051	15.7323	15.1918	17.7579	18.3908	16.4625	13.1205	11.2758	12.2144	10.9259	LOC104427719	pre-mRNA-splicing factor ATP-dependent RNA helicase DEAH1
Eucgr.K02040	21.6055	26.5072	20.6165	19.7285	21.6234	21.8883	25.0354	20.6426	28.1726	22.7883	25.4382	25.9141	LOC104425642	uncharacterized LOC104425642
Eucgr.D02575	0	0	0	0	0	0	0	0	0	0	0	0	LOC104443284	patatin-like protein 2
Eucgr.B03990	0.997764	1.19231	1.08153	0.12473	0.700361	0.407167	1.49272	0.852686	1.38636	0.594481	1.37109	1.33189	LOC104434106	uncharacterized LOC104434106
Eucgr.L01723	0	0	0	0	0	0	0	0	0	0	0	0
Eucgr.G00698	0	0	0	0	0	0	0	0	0	0	0	0
Eucgr.K01737	0.685899	1.67907	1.40913	0.367123	0.610762	0.360723	1.51499	1.38939	1.76892	0.7667	1.07996	0.319497	LOC104427480	probable leucine-rich repeat receptor-like serine/threonine-protein kinase At3g14840
Eucgr.I00068	14.3276	15.2303	13.2321	10.5321	7.13037	3.73858	4.71316	3.6196	3.66907	4.61606	6.57106	5.95663	LOC104418030	F-box protein At3g07870
Eucgr.F01390	7.49682	4.03134	10.0376	536.345	651.552	967.294	9.794	8.35881	4.42771	92.8548	84.942	92.4606	LOC104448623	cytochrome P450 72A15
Eucgr.E03501	0	0	0.126154	0	0	0	0.534029	0.543173	0.340387	0.516089	0.210912	0.230332	LOC108959623	leucine-rich repeat-containing protein 1-like
Eucgr.K03441	0.183667	0	0	0	0	0	0	0	0	0.348018	0	0.177282	LOC104426726	glutaredoxin-C13
Eucgr.F00241	15.0409	21.2116	11.486	5.99157	5.17291	3.26297	14.4262	14.7956	14.554	5.07994	7.52233	6.61924	LOC104447908	DPH4 homolog
Eucgr.G00732	0	0	0	0	0	0.093589	0	0	0	0	0	0
Eucgr.J01116	0	0	0	0	0	0	0	0	0	0	0	0
Eucgr.D01774	0	0	0	0	0	0	0	0	0	0	0	0	LOC104443107	stellacyanin
Eucgr.A01634	0	0.060906	0	0.943726	1.04242	0.14855	0.282744	0.078694	0.083817	1.15842	1.52748	1.52013	LOC104456209	uncharacterized LOC104456209
Eucgr.D01826	19.1915	15.0313	19.368	2.25459	2.6676	1.80414	7.63449	6.58766	7.58698	0.885037	0.937617	0.778707	LOC104441725	homeobox protein BEL1 homolog
Eucgr.G01913	0	0	0	1.16122	0.514512	0.67647	0.332845	0	0.216796	4.6451	4.99444	3.31857	LOC104455560	uncharacterized LOC104455560
Eucgr.K02749	0	0	0	0	0	0	0	0	0	0	0	0.08262	LOC104426187	lysine histidine transporter 1
Eucgr.H01401	0	0.153907	0	0	0	0	0.782174	0	0	0	0	0	LOC104416518	serine carboxypeptidase 1
Eucgr.F00588	526.095	463.921	479.084	504.11	341.989	394.751	1019.29	953.793	830.621	848.456	871.72	927.009	LOC104448128	snakin-2
Eucgr.D00932	0	0	0	0	0	0	0	0	0	0	0	0
Eucgr.C00206	0	0	0	0	0.366104	0	0	0	0	0.370919	0	0	LOC104438760	EG45-like domain containing protein 2
Eucgr.L01981	0	0	0	0	0	0	0	0	0	0	0	0	LOC104430179	putative UPF0481 protein At3g02645
Eucgr.G01293	15.9008	16.9354	18.2441	18.2583	18.5134	11.7149	13.6693	12.581	12.157	17.1644	14.4299	15.9981	LOC104453119	uncharacterized LOC104453119
Eucgr.B03733	16.283	18.5708	18.4363	7.22752	6.23672	3.3997	9.56638	9.65435	8.68878	5.92423	5.9876	5.00025	LOC104433876	translation initiation factor IF-2
Eucgr.D01244	0	0	0	0	0	0	0	0	0	0	0	0	LOC104442877	transient receptor potential cation channel subfamily A member 1
Eucgr.E03306	0	0.951583	0	0.221812	0	0	2.34283	0.578548	0.355963	0	0.597359	0.129462
Eucgr.E04003	0	0	0	0	0	0	0	0	0	0	0	0
Eucgr.G01528	0	0	0	0	0	0	0	0	0	0	0	0	LOC104455394	acetyl-CoA-benzylalcohol acetyltransferase
Eucgr.D00222	8.51543	12.8596	14.4202	4.96202	6.46228	6.12804	14.0346	12.5403	11.8947	4.731	4.05157	4.41202	LOC104440733	pentatricopeptide repeat-containing protein At5g62370
Eucgr.E03412	0	0	0	0	0	0	11.1478	3.05297	3.52953	4.96363	4.71464	6.07304
Eucgr.F02389	8.91498	6.37423	9.81459	42.5053	28.5138	3.32025	6.77903	7.3075	5.25404	22.8465	27.1681	24.2449	LOC104449358	lysine histidine transporter-like 8
Eucgr.K01148	0	0	0	0	0	0	0	0	0	0	0	0
Eucgr.B02150	75.3432	97.5055	89.9796	40.5957	41.462	43.8764	108.947	95.0362	139.953	33.4256	39.7163	38.9364	LOC104432544	serine/threonine protein phosphatase 2A regulatory subunit B''beta
Eucgr.K00365	9.26556	8.2134	9.52523	10.1848	11.6518	11.2162	2.08402	2.36683	2.88822	1.43681	2.18135	1.19644	LOC104424493	hypothetical protein
Eucgr.E00830	4.33338	6.78812	4.66339	3.80728	6.70186	10.6176	13.3959	12.9393	14.0926	2.88787	2.90652	3.27529	LOC104443963	putative glucose-6-phosphate 1-epimerase
Eucgr.L00156	20.9709	24.5026	23.7026	10.6547	8.18653	7.82019	11.2255	9.72095	11.1663	11.1487	12.4745	9.6984	LOC104428145	SNF1-related protein kinase regulatory subunit beta-2
Eucgr.H01463	84.6429	71.4444	86.3709	210.295	233.25	278.721	45.7979	38.9833	37.8498	114.622	111.902	108.398	LOC104456984	hypothetical protein
Eucgr.K00966	0.574364	0.306957	0.685545	1.10087	1.41698	0.578228	1.94198	1.96586	2.0146	1.24167	1.33211	1.1381	LOC104424892	probable polyol transporter 4
Eucgr.H04455	0.880849	0.275198	0.846471	0.588963	0	0	1.26763	0.767286	1.3538	0.501359	1.07439	1.32454	LOC104415528	uncharacterized LOC104415528
Eucgr.L01284	0	0	0	0	0	0	0	0	0	0	0	0	LOC104429378	probable E3 ubiquitin-protein ligase ATL45
Eucgr.G00624	7.48276	11.4258	8.54854	1.66005	1.16878	1.79634	26.6761	31.3788	36.2518	2.72922	3.58189	2.77616	LOC104452743	mitogen-activated protein kinase kinase kinase 1
Eucgr.K01428	113.839	144.441	146.456	91.3142	70.0086	57.7875	89.6557	74.8868	84.8273	44.4597	42.3007	41.0788	LOC104425228	putative G3BP-like protein
Eucgr.E01773	56.4726	56.4342	58.8026	48.1147	43.1457	32.8484	19.9377	21.5858	18.4012	12.7174	14.4564	12.9903	LOC104444540	protein SCAI
Eucgr.J01977	1.60672	1.39726	2.54104	6.73219	38.5722	25.9254	0.304604	0.306309	0.327452	9.16509	8.16804	7.89692	LOC104422445	18.1 kDa class I heat shock protein
Eucgr.E02523	1.84208	2.41388	2.49136	0.612631	0.900746	1.62057	2.69969	1.94545	2.32958	0.384724	0.397837	0.54322	LOC108960195	leucine-rich repeat-containing protein 40-like
Eucgr.E01096	7.33414	9.08815	7.27385	6.30635	8.25073	13.1173	11.3086	9.95132	9.88853	9.84695	9.66864	8.6816	LOC104444144	uncharacterized LOC104444144
Eucgr.J00872	5.69202	9.62696	8.93018	1.82296	2.06571	0.993188	2.68454	2.45404	2.63784	2.39968	2.01121	2.4306	LOC104421610	uncharacterized LOC104421610
Eucgr.J02262	19.8417	32.3089	22.6217	13.4277	8.73835	5.93282	21.6201	18.822	18.7767	17.958	15.4238	17.8114	LOC104422656	pentatricopeptide repeat-containing protein At4g35850, mitochondrial
Eucgr.G01103	0	0	0	0	0	0	0	0	0	0	0	0	LOC104452998	peptide methionine sulfoxide reductase B3
Eucgr.C00711	0	0	0	0	0	0	0	0	0	0	0	0
Eucgr.D01425	0	0	0	0	0	0	0	0	0	0	0	0	LOC104442969	cysteine proteinase inhibitor 1
Eucgr.H00128	4.72277	2.42411	5.58069	1.29621	1.59901	1.40944	2.44879	3.07613	1.83792	2.39025	2.49945	2.42051	LOC104456077	28 kDa ribonucleoprotein, chloroplastic
Eucgr.I02358	0.277344	0	0	0.65059	0.428668	0.124634	0	0	0.24046	0.50878	0.332368	0.919564	LOC104419667	auxin-induced protein 15A
Eucgr.H02996	0	0.193077	0.52395	0.204886	0	0	0.189401	0	0.083309	0	0.125404	0
Eucgr.B01170	0.058382	0	0	0	0	0	0	0	0	0	0	0
Eucgr.G02381	23.0762	21.3936	25.4552	8.85732	8.26773	7.13165	23.8763	24.0399	19.9776	5.20876	5.76732	4.65352	LOC104453848	putative phospholipid-transporting ATPase 9
Eucgr.B00988	2.53468	1.41389	1.62435	9.01894	5.43855	5.56758	1.34104	1.09089	0.606932	3.51125	4.20921	3.07021	LOC104423377	uncharacterized protein At3g17950
Eucgr.C00797	34.7637	66.0464	21.5728	2.20584	1.28567	0.774022	7.08058	19.1981	12.1838	0.620964	0.676477	0.58804	LOC104436406	subtilisin-like protease SBT1.8
Eucgr.J02072	1.85246	2.48538	1.82314	2.74103	3.03489	5.18917	2.66005	2.19448	1.79533	5.24142	4.95753	3.6349
Eucgr.G02744	0	0	0	0	0	0	0	0	0	0	0	0
Eucgr.H01296	0	0	0	0	0	0	0	0	0	0	0	0
Eucgr.F02563	16.5312	13.0143	16.2112	377.979	269.534	332.903	11.7376	17.2516	27.5638	42.5541	34.686	42.0318	LOC104449483	probable 2-oxoglutarate-dependent dioxygenase AOP1
Eucgr.C01939	3.30274	2.10096	2.70305	8.2743	7.71537	5.56873	7.02584	5.20779	4.97154	10.6326	10.3479	10.8628	LOC104437132	formin-like protein 6
Eucgr.A02454	20.1688	21.7458	21.015	8.9716	9.03103	8.62823	25.8637	19.4871	25.6533	6.98583	7.00323	5.79023	LOC104445882	metal tolerance protein C2
Eucgr.K02270	4.24968	5.17412	6.12722	3.61298	3.73627	4.59333	5.80272	6.46269	5.41411	3.64548	4.67269	4.02403	LOC104425835	pentatricopeptide repeat-containing protein At3g18020
Eucgr.I02199	2.3568	3.04727	3.383	16.9762	18.2922	17.9066	5.99047	8.0589	5.94799	9.94273	9.0515	8.57645
Eucgr.E03348	282.728	239.419	249.611	74.9679	74.3166	50.5072	102.314	139.059	100.385	65.1905	69.2606	68.9882	LOC104445303	H/ACA ribonucleoprotein complex subunit 4
Eucgr.H03665	0	0	0	0	0	0	0	0	0	0	0	0	LOC104417424	heavy metal-associated isoprenylated plant protein 20
Eucgr.E03374	0	0	0	0	0	0	0	0	0	0	0	0
Eucgr.F03743	75.8436	88.5178	85.0292	146.098	154.415	160.277	178.118	144.598	156.158	109.709	108.583	105.004	LOC104450465	mitogen-activated protein kinase kinase kinase 1
Eucgr.K02085	23.7132	29.6599	26.8276	24.7304	33.2693	28.7867	16.5033	15.2175	16.1657	26.8544	24.159	33.2471	LOC104425677	protein FAR1-RELATED SEQUENCE 5
Eucgr.I00971	1.00533	1.10567	1.14845	0	0.230947	0	0.533219	0.484737	0.152839	0.379081	0.517042	0.077011	LOC104418600	patatin-like protein 2
Eucgr.A00431	0.24756	0.561481	0.542686	0.311738	0.853814	1.35966	0.274383	0.585405	0.395491	0.22967	0.253114	0.267629	LOC104455827	type I inositol polyphosphate 5-phosphatase 12
Eucgr.H00931	0	0.356279	0.25384	0	0	0	0	0	0	0	0.262672	0	LOC104416357	ABSCISIC ACID-INSENSITIVE 5-like protein 3
Eucgr.A01799	9.52191	16.1851	12.1667	7.15468	8.32531	12.8182	35.0438	27.345	37.3636	4.95392	2.9775	3.89336
Eucgr.B01480	0	0	0	0	0	0	0	0	0	0	0.072253	0
Eucgr.L01139	0	0	0	0	0	0	0	0.176314	0.237058	0	0	0	LOC104429243	pyruvate decarboxylase 1
Eucgr.I02367	4.03674	6.74799	3.84788	4.66347	1.91664	1.28441	2.57274	4.59679	4.58098	1.77147	2.09416	1.29801	LOC104419674	probable LRR receptor-like serine/threonine-protein kinase At4g36180
Eucgr.B02105	3.95028	4.13074	3.77461	3.53687	4.51572	3.99274	1.41374	0.986798	0.943457	0.13856	0.259979	0.16384	LOC104435252	probable disease resistance protein At4g27220
Eucgr.C00281	0.504282	0.795681	0.679923	0.150171	0.395332	0.383748	3.57585	2.48628	2.79815	0	0	0
Eucgr.K03533	133.161	132.425	93.7716	229.628	202.831	174.82	98.6748	112.083	81.8663	237.542	237.648	240.36	LOC104426808	transmembrane protein 205
Eucgr.G01242	0	0	0	0	0	0	0	0	0.290761	0	0	0	LOC104453089	B3 domain-containing protein Os03g0619600-like
Eucgr.K01883	0.591246	0.376929	0	1.01728	1.28791	0.819042	1.16136	1.06353	1.01181	0	0.571448	0.577675
Eucgr.I00026	0.605089	1.20341	1.40817	1.01146	0.918308	1.77309	1.48926	1.0691	1.5956	0.430912	0.392166	0.398797
Eucgr.J00491	4.10559	4.52551	5.53493	2.33649	2.61119	2.52948	3.44278	2.88667	3.53125	3.61876	4.23974	4.60143	LOC104421301	transcription factor TGA2.2
Eucgr.A02668	0	0	0	0.098347	0	0	0	0	0	0	0	0	LOC104415248	inorganic phosphate transporter 1-11
Eucgr.E01736	0	0	0	0	0	0	0	0	0	0	0	0	LOC104444521	agamous-like MADS-box protein AGL80
Eucgr.K01560	0	0	0	0	0	0	0	0	0	0	0	0
Eucgr.H00247	0.489278	0	0.33986	0	0	0	0	0.123534	0.058758	0.173275	0	0
Eucgr.H01659	0.669024	0.324402	0.638011	0.982754	3.35524	8.53558	0.170074	0.085789	0.16598	0.239854	0.07442	0.082233	LOC104416633	ethylene-responsive transcription factor ERF109
Eucgr.D02344	5.97084	4.64706	5.62338	15.8039	21.8232	18.4227	6.85678	6.62988	7.07317	23.8015	24.1781	25.9585	LOC104442152	ethylene-responsive transcription factor CRF4
Eucgr.K01899	0	0	0	0	0	0	2.93983	3.66461	2.77123	6.58683	8.4694	7.70274
Eucgr.G03395	69.6721	86.1747	76.8377	50.7476	53.8379	58.7037	103.036	79.8094	89.526	56.5943	56.4303	58.2113	LOC104454672	SURP and G-patch domain-containing protein 1-like protein
Eucgr.B02168	6.93091	7.06678	5.89408	3.90293	3.24017	3.25083	3.96846	3.71106	3.25912	3.25142	3.02212	2.84584	LOC104432558	uncharacterized LOC104432558
Eucgr.C02701	0	0	0	0	0	0	0	0	0	0	0	0
Eucgr.L00919	0	0	0	0	0	0	0	0	0	0	0	0
Eucgr.J00779	1.1583	2.69952	3.17435	0.38471	0	0	1.10048	1.00567	0.795119	0.311726	0.353017	0	LOC104421525	1-acyl-sn-glycerol-3-phosphate acyltransferase 2
Eucgr.I01214	0	0	0.288383	0	0	0	0	0	0	0	0	0
Eucgr.B00180	0	0.241931	0	0.11585	0.33646	0.087883	0.938666	0.863623	0.559296	0.71166	0.910908	1.57579	LOC104417388	E3 ubiquitin-protein ligase RGLG2
Eucgr.A01162	0	0	0	0	0	0	0	0	0	0	0	0
Eucgr.H05005	11.8154	14.3867	14.576	17.6626	15.231	13.1915	18.2818	13.7702	16.4425	11.8775	13.1737	12.0117	LOC104415925	glutamate--tRNA ligase, chloroplastic/mitochondrial
Eucgr.A02972	15.5264	18.9625	17.2897	4.11786	6.34423	3.17132	16.3858	14.971	15.8717	12.0296	12.5934	11.2351	LOC104450448	peptidyl-tRNA hydrolase 2, mitochondrial
Eucgr.D02576	0	0	0	0	0	0.61777	0	0	0	0	0	0
Eucgr.H04499	0	0	0.077559	2.00393	4.27862	2.07435	0	0	0.162962	1.67563	1.33434	1.63475	LOC104415561	probable linoleate 9S-lipoxygenase 5
Eucgr.J01650	4.61938	4.55733	4.70453	0.839054	1.00685	0.56665	6.27967	5.16914	4.81949	1.69623	1.40198	1.77253	LOC104422213	WAT1-related protein At3g02690, chloroplastic
Eucgr.L00659	0	0	0	0	0	0	0	0	0	0	0	0
Eucgr.I02193	0	0	0	0.040371	0	0.119961	0	0	0	0	0.094121	0.024477	LOC104420743	vacuolar iron transporter homolog 5
Eucgr.K00034	0	0	0	0	0	0	0.044113	0	0.106948	0	0	0.066907	LOC104424240	rust resistance kinase Lr10
Eucgr.F04072	0	0	0	0	0	0	0	0	0	0	0	0	LOC104450731	uncharacterized LOC104450731
Eucgr.G00181	0	0	0	0	0	0	0	0	0	0	0	0
Eucgr.A02257	0.850093	0.827412	0	0	0	0	0.60917	2.31057	0.984165	0	0	0	LOC104414402	protein STRICTOSIDINE SYNTHASE-LIKE 10
Eucgr.C03591	0.11978	0	0.114409	10.0936	7.68899	9.39636	1.15292	0.964912	1.57996	10.615	10.1756	9.80881	LOC104440246	ankyrin repeat-containing protein ITN1
Eucgr.J01999	69.1219	82.7841	71.4485	34.9066	29.9766	18.774	77.9132	64.1399	70.8204	25.5613	23.9263	21.5756	LOC104423845	DNA-directed RNA polymerase II subunit RPB7
Eucgr.F01980	0.971221	0.576327	0.944924	13.7756	10.8701	16.8627	1.24071	1.20844	1.02242	9.15483	9.58111	9.85344	LOC104449063	receptor-like protein kinase BRI1-like 3
Eucgr.K01557	0	0	0.046159	0	0.038429	0.430464	0	0.052486	0	0	0	0
Eucgr.J02155	4.47818	3.08766	4.55538	3.86884	3.93815	2.29987	17.2612	10.8894	12.0701	7.2322	6.25581	6.4206	LOC104422571	inactive LRR receptor-like serine/threonine-protein kinase BIR2
Eucgr.H04007	1121.37	738.692	1243.59	309.328	294.79	333.087	587.374	512.526	571.345	236.59	219.164	228.363	LOC104415205	major allergen Pru ar 1
Eucgr.F02036	77.3068	87.6766	87.2206	17.6766	16.4197	11.8881	56.0966	57.4927	48.7808	21.4201	22.8386	20.5972	LOC104449109	probable 28S rRNA (cytosine(4447)-C(5))-methyltransferase
Eucgr.C00930	8.27787	8.85696	7.94044	4.45328	3.96732	1.43444	3.5843	3.50341	3.02784	3.68929	3.14494	3.71889	LOC104436519	uncharacterized LOC104436519
Eucgr.K02600	0	0	0	0	0	0	0	0	0	0	0	0
Eucgr.J00131	14.6334	23.9467	21.0943	14.0558	10.9446	14.3806	18.1854	11.7159	15.0033	3.42308	4.39305	3.12153	LOC104421001	uncharacterized LOC104421001
Eucgr.E01051	240.517	197.189	223.077	95.3257	74.3864	93.8473	158.536	162.857	161.824	72.353	76.7235	76.2429	LOC104444105	protein GPR107
Eucgr.K01503	1.51644	1.87608	1.95726	3.53317	2.17845	2.95348	7.72137	3.8775	5.57717	0.104663	0.245098	0	LOC104425274	5'-adenylylsulfate reductase-like 5
Eucgr.I02407	0	0	0	0.340756	0	0	0	0	0	0.252716	0.139859	0
Eucgr.H03836	0	0	0	0	0	0	0	0	0	0	0	0
Eucgr.J02348	15.9435	16.7463	21.6105	1.26404	3.32162	2.87594	0	0	0	0	0	0	LOC104423945	agamous-like MADS-box protein AGL82
Eucgr.E00190	1.22743	2.82238	2.22714	1.50213	1.8656	3.94713	4.84147	4.0785	5.80619	2.19528	0.944005	0.388756
Eucgr.C02465	0	0.034344	0	0	0	0	0.39559	0.25498	0.14058	0.923926	1.32801	1.52019	LOC104439690	AAA-ATPase At5g57480
Eucgr.E04301	50.5849	46.3992	52.2246	8.73523	7.88895	5.82307	41.5533	31.7451	33.0295	4.62328	5.27224	4.4804	LOC104445815	potassium transporter 10
Eucgr.F03444	60.741	55.6568	66.3334	51.9433	59.7193	82.0645	43.3787	40.8877	34.0281	37.2006	38.8742	37.1254	LOC104450222	septum-promoting GTP-binding protein 1
Eucgr.K00534	0.042197	0	0.11443	0	0.191041	0.063274	0.056091	0	0	0.025177	0	0	LOC104427070	ABC transporter B family member 1
Eucgr.H01517	0.233233	0	0.719978	0	0	0	10.9733	11.2056	4.26117	0.610889	0	0.464439
Eucgr.C00377	0	0	0	0	0	0	0	0	0	0	0	0	LOC104438836	temperature-induced lipocalin-1
Eucgr.H03758	0.904478	3.46605	1.16622	0.390748	0.925349	0.60665	0.876109	0.618073	1.22141	0	0	0	LOC104415025	uncharacterized LOC104415025
Eucgr.H00565	4.23645	6.57393	5.04854	4.11493	3.31575	2.27347	10.383	10.2068	10.2184	12.2093	14.1011	16.0577	LOC104456373	uncharacterized LOC104456373
Eucgr.E00274	6.41801	6.95607	8.27408	34.9205	28.6278	21.2902	8.01762	8.46388	5.05858	9.95565	8.12598	8.54743	LOC104443543	RING-H2 finger protein ATL51
Eucgr.L01126	0	0	0	0	0	0	0	0	0	0	0	0.308685
Eucgr.G02015	0	0	0	0	0	0	0	0	0	0	0	0	LOC104453587	inactive leucine-rich repeat receptor-like serine/threonine-protein kinase At1g60630
Eucgr.C03564	0	0.453747	0.061014	0	0	0	0.436975	1.0477	0.873879	0.054855	0.051004	0	LOC104440234	mechanosensitive ion channel protein 10
Eucgr.K01994	0	0	0	0	0	0	0	0	0	0	0	0
Eucgr.K02377	0	0	0	0	0	0	0	0	0	0	0	0	LOC104427678	uncharacterized LOC104427678
Eucgr.H01108	39.0215	89.288	90.2075	77.2718	56.9861	51.7265	29.8688	46.9597	93.4619	49.2113	49.5507	44.0702	LOC104456749	blue-light photoreceptor PHR2
Eucgr.H00664	21.3727	41.5559	27.073	8.72461	12.899	13.7047	25.3013	20.3718	22.4138	15.1098	12.7769	14.177	LOC104456441	uncharacterized LOC104456441
Eucgr.F02736	60.2048	58.6011	67.2998	16.7388	16.629	19.0122	48.7642	42.8001	43.1771	16.0838	16.7554	16.9401	LOC104449624	vacuolar protein sorting-associated protein 45 homolog
Eucgr.L00340	0	0	0	0	0	0	0	0	0	0	0	0	LOC104428340	uncharacterized LOC104428340
Eucgr.F04288	0.720444	0.649477	0.663422	5.33327	4.1127	4.51991	7.7881	4.65109	5.15042	18.5907	17.6999	18.6341	LOC104452338	putative wall-associated receptor kinase-like 16
Eucgr.B02309	4.14719	3.17264	2.78011	1.31548	1.97776	0.981151	3.37451	4.67559	3.60625	3.43842	2.75364	2.75249	LOC104432693	D-xylose-proton symporter-like 3, chloroplastic
Eucgr.E01068	89.997	145.145	88.6202	8.01733	8.50997	7.72395	113.99	96.6477	88.6811	6.84867	6.41458	6.47663	LOC104444119	granule-bound starch synthase 1, chloroplastic/amyloplastic
Eucgr.K00786	89.2084	73.8281	68.1573	33.3893	37.3946	47.8059	194.528	222.128	235.176	29.7754	29.3286	31.8876	LOC104424751	probable WRKY transcription factor 31
Eucgr.A01762	0.054199	0.094794	0.175853	0.273492	0.124901	0.110554	1.10899	1.48602	0.952953	1.67543	1.60119	1.59492
Eucgr.C00894	0.138597	0	0.146374	0	0	0.205647	0.164798	0.723495	0.355622	0.961322	1.26779	1.43809
Eucgr.F01551	0.470413	0.637955	0.477118	2.78444	3.0993	1.1562	0.821115	0.670576	0.659037	3.51184	3.10311	3.6839	LOC104448742	cytochrome P450 734A1
Eucgr.I02504	4.31467	4.70303	4.731	6.55814	7.2534	5.90346	9.34724	7.19081	7.61841	4.60631	5.2357	5.83517	LOC104419805	serine/threonine-protein kinase TOR
Eucgr.H03891	0.492302	0.95126	0.895036	4.15272	4.34835	5.35766	0.532835	0.674772	0.412348	0.35616	0.258239	0.236478	LOC108954464	potassium transporter 5-like
Eucgr.G00774	15.6612	17.795	19.1664	7.09328	6.22628	6.82735	14.4078	14.9317	14.3702	3.44178	3.93788	3.65991	LOC104452816	pentatricopeptide repeat-containing protein At1g22960, mitochondrial
Eucgr.B03552	0.598559	0.241632	0.631896	1.9528	1.60398	0.784755	2.07113	0.965271	0.925279	1.18057	1.00423	1.09216	LOC104433725	inactive leucine-rich repeat receptor-like protein kinase CORYNE
Eucgr.F00243	62.2079	57.7489	60.6495	69.4675	60.5947	67.6191	67.4143	62.4877	67.4519	70.3794	83.1762	75.9718	LOC104447910	succinate dehydrogenase subunit 5, mitochondrial
Eucgr.B00136	0	0	0	0	0	0	0	0	0	0	0	0	LOC104417065	beta-glucosidase 24
Eucgr.L01157	0	0	0	0	0	0	0	0	0	0	0	0	LOC104429269	cysteine-rich receptor-like protein kinase 1
Eucgr.H02482	0	0.181239	0.172149	0.363187	0.594796	0.623054	0	0	0	0.202831	0	0.355357
Eucgr.H01293	0	0	0	0	0	0	0	0	0	0	0	0
Eucgr.C00739	18.4399	21.8665	21.243	26.4792	22.1059	19.8173	14.4886	13.9626	12.9903	16.7797	15.74	18.0159	LOC104436355	G-protein coupled receptor 1
Eucgr.L00026	27.3065	22.9128	32.7196	15.0499	15.5274	13.6542	36.6665	36.1032	33.586	28.2264	26.5141	29.1396
Eucgr.A01841	0	0	0	0	0	0	0	0	0.086642	0	0.104405	0
Eucgr.H04247	1.11015	2.80501	1.0049	1.27524	1.15778	1.12638	1.44936	0.871726	1.09725	0.700046	0.119577	0.61813	LOC104415374	activating signal cointegrator 1
Eucgr.F03280	35.6543	28.4273	36.8872	15.0994	13.9825	14.2276	76.4879	68.2938	74.5595	35.7542	37.4734	35.5741
Eucgr.B00657	31.4291	35.2479	31.1118	10.086	10.2179	9.48836	5.21263	5.57641	5.79779	2.05721	1.77475	1.84919	LOC108955039	uncharacterized LOC108955039
Eucgr.J01236	0.103622	0.39992	0.665171	3.32124	1.35303	0.126838	0	0.210804	0.101963	0.619841	0	0.493717
Eucgr.D01402	2.26465	2.81065	2.78232	0.123099	0.204166	0	14.7958	10.4805	10.9385	8.80687	7.45901	9.29369
Eucgr.F02511	19.8859	13.167	17.2712	9.54325	6.37651	4.1281	25.6964	28.6738	24.5379	7.55451	8.12782	6.17328	LOC104449446	LEAF RUST 10 DISEASE-RESISTANCE LOCUS RECEPTOR-LIKE PROTEIN KINASE-like 2.3
Eucgr.C04136	0	0	0	0	0.363456	0	0	0	0	0.09243	0.038542	0
Eucgr.L02864	0	0	0	0	0	0	0	0	0	0	0	0
Eucgr.G03038	104.512	102.227	107.225	22.2634	24.0726	24.3496	76.1872	78.0036	81.8607	31.241	34.4918	33.1645	LOC104454377	glycosyltransferase family 64 protein C4
Eucgr.F04350	11.1339	11.9017	10.4605	6.77324	5.67178	3.96268	13.6338	12.768	11.6276	10.9111	11.1829	9.35626	LOC104450935	TLC domain-containing protein 2
Eucgr.H00511	2.95839	2.41538	2.5792	25.0692	23.9622	20.871	13.5162	9.43313	9.16928	24.3191	23.7346	22.5565	LOC104416213	putative calcium-transporting ATPase 13, plasma membrane-type
Eucgr.I01480	0.200734	0.295581	0.537314	13.8975	21.6678	20.3272	2.26291	1.10657	0.648332	35.0433	32.3557	36.0149	LOC104419000	uncharacterized LOC104419000
Eucgr.J00737	32.4424	28.8831	32.377	19.762	21.5634	24.0516	26.8723	25.4034	23.8895	13.662	13.5591	14.2739	LOC104421492	uncharacterized LOC104421492
Eucgr.F02581	82.6343	69.7714	60.4326	31.3796	30.3164	86.4608	34.1207	53.2646	40.5237	37.8868	32.3474	33.8289	LOC104449499	succinate dehydrogenase assembly factor 1, mitochondrial
Eucgr.B00910	5.60075	3.84545	3.98962	1.71774	1.31175	0.823871	1.2882	1.04879	0.931193	0.533254	1.55136	0.984387	LOC104434498	sodium channel modifier 1
Eucgr.A02577	0	0	0	0	0	0	0	0	0	0	0	0
Eucgr.E02908	0	0	0	0.058244	0	0	1.8366	2.69525	2.17778	0	0.217687	0.438613	LOC104446993	zingipain-2
Eucgr.A02379	96.829	117.967	104.867	29.7997	45.4153	55.1405	71.344	61.4949	61.1705	24.7382	25.6795	25.3451	LOC104445213	remorin
Eucgr.I02181	2.33324	2.70998	2.26385	290.289	228.204	212.685	11.7966	8.78096	8.70331	190.909	191.125	180.678	LOC104419546	probable L-type lectin-domain containing receptor kinase S.5
Eucgr.A00117	207.603	192.374	224.287	80.6624	72.9532	70.0147	201.873	281.095	256.585	52.1309	49.3586	50.3606	LOC104436737	F-box/kelch-repeat protein At1g22040
Eucgr.C00171	0	0	0	0	0	0	0	0	0	0	0	0	LOC104438753	zinc finger protein 2
Eucgr.L00668	0	0	0	0	0	0	0	0	0	0	0	0
Eucgr.K03485	0.387065	0.297511	0.749373	0.139419	0.113897	0.158781	0.042389	0.071747	0	0	0.055761	0	LOC104426761	DExH-box ATP-dependent RNA helicase DExH8
Eucgr.H00201	5.21966	5.53119	4.88347	1.22636	2.79239	2.21648	1.20194	3.37091	1.74719	5.42747	4.21997	4.80976	LOC104456128	protein SIEVE ELEMENT OCCLUSION B
Eucgr.K02602	28.1927	38.1688	32.1933	22.1867	24.3074	21.9592	25.7302	24.6941	26.3416	27.5512	31.2921	25.4457	LOC104426065	uncharacterized LOC104426065
Eucgr.H03920	2.88827	3.04188	2.25974	6.0502	6.8423	8.6886	72.5661	51.4127	64.1134	17.288	15.4786	19.3828	LOC104415145	inositol 4-methyltransferase
Eucgr.G01820	31.9613	26.9599	39.9989	79.7602	64.9046	53.0513	67.534	70.671	66.683	4.88599	3.95556	4.48362
Eucgr.B03157	324.556	389.673	343.689	79.7868	64.0539	79.9816	71.3843	110.994	90.0726	28.8808	30.1511	28.5137	LOC104433386	PLASMODESMATA CALLOSE-BINDING PROTEIN 3
Eucgr.F01183	189.942	185.702	175.54	86.4035	85.293	55.1595	97.1051	101.185	96.0347	99.4535	101.472	105.42	LOC104448500	ras-related protein RABA1f
Eucgr.E00384	0	0	0	0	0	0	0	0	0	0	0	0
Eucgr.G01856	0	0.150067	0.211273	0	0.179125	0	5.55362	5.6091	5.44287	4.07355	4.23666	3.83919	LOC104455540	probable disease resistance protein At5g63020
Eucgr.E03884	60.2518	30.5361	89.5611	26.4383	31.5967	19.2278	134.56	132.13	139.476	75.3529	78.4468	77.2822	LOC104445607	uncharacterized LOC104445607
Eucgr.K01859	5.86781	16.3042	11.1211	0	0	0	3.3982	8.83892	2.20645	4.39298	4.40854	3.32939	LOC104425510	putative defensin-like protein 157
Eucgr.B02352	475.348	493.403	519.232	146.148	169.655	184.476	415.576	442.768	443.724	180.427	201.26	187.926
Eucgr.C02349	0	0	0	0	0	0	0	0	0	0	0	0
Eucgr.J02921	0.102894	0	0	1.42109	1.72993	1.49765	6.33845	8.14193	5.84734	12.4748	12.3889	9.44268
Eucgr.G00409	0	0	0	0	0	0	0.045733	0.023146	0.100422	0.02174	0	0.011056
Eucgr.H01068	83.3164	124.488	89.1808	16.4497	12.6069	17.6807	108.427	104.009	122.975	32.5475	39.1124	33.5046	LOC104456717	hypothetical protein
Eucgr.H03721	0	0	0	0	0	0	0	0	0	0	0	0
Eucgr.H03604	24.8957	27.4898	25.086	8.90129	6.78086	3.51579	9.03894	10.2615	6.92809	2.86846	2.60605	2.43373	LOC104414903	mediator of RNA polymerase II transcription subunit 33A
Eucgr.G01954	3.12276	5.08741	2.67692	274.349	229.684	223.89	97.4435	71.9517	93.2412	163.044	160.663	160.286	LOC104455574	protein TIFY 9
Eucgr.B02019	0	0	0	0	0	0	0	0	0	0	0	0
Eucgr.F01104	6.89945	4.34991	4.66319	269.25	377.541	326.28	5.77541	7.54192	4.17562	594.04	605.22	605.192	LOC104448425	E3 ubiquitin-protein ligase RMA3
Eucgr.D00313	0	0	0	0	0	0	0.241185	0	0	0	0	0	LOC104442541	agamous-like MADS-box protein AGL29
Eucgr.I02659	2.94184	1.97467	2.444	2.03422	2.68675	0.796005	3.87683	2.55568	3.09941	1.33936	0.657206	0.453696	LOC104419904	metacaspase-3
Eucgr.H02212	0	0	0	0	0	0	0	0	0	0	0	0	LOC104416865	TMV resistance protein N-like
Eucgr.F03241	6.21434	7.7018	8.80276	10.3956	8.95172	6.22078	7.09972	6.24353	6.85605	14.3498	15.2976	14.0484
Eucgr.B01758	322.987	321.137	338.506	50.8734	47.2294	75.0657	351.493	313.336	317.045	28.4099	25.0603	28.0729	LOC104430916	sodium/hydrogen exchanger 2
Eucgr.K02491	8.55339	7.09457	6.46258	5.05382	4.467	5.58016	10.1621	7.52201	11.2916	4.8734	5.02824	5.7625
Eucgr.C03511	0.355421	0.651429	0.503126	1.25526	0	0	0.761193	0.513097	1.85322	0.398535	0.611757	0.993108	LOC104438124	uncharacterized LOC104438124
Eucgr.C03572	0.203874	0.101971	0.341291	0.120124	0.779476	0.397163	2.82497	3.01509	3.51534	0.442705	0.206832	0.151674	LOC104440239	ankyrin repeat-containing protein ITN1
Eucgr.L00488	0	0	0	0	0	0	0.165424	0	0.161442	0	0	0
Eucgr.A00090	0	0	0	0	0	0	0	0	0	0	0	0
Eucgr.F03015	13.0203	18.3069	14.8777	8.31991	7.46226	10.7878	12.1292	12.1192	11.1184	4.47838	4.53519	4.77363	LOC104449864	uncharacterized LOC104449864
Eucgr.K03477	3.47959	2.81808	3.39315	16.3553	15.3378	12.5183	2.45195	4.27531	3.07653	19.0777	17.8153	19.4297	LOC104426764	DExH-box ATP-dependent RNA helicase DExH8
Eucgr.G02666	20.9423	24.5991	26.4099	7.00732	8.04758	7.51279	13.5978	15.413	15.1628	6.17576	7.3488	6.92335	LOC104454077	protein-S-isoprenylcysteine O-methyltransferase A
Eucgr.H01789	0	0	0	0	0	0	0	0	0	0	0	0
Eucgr.A00767	0	0	0	0	0	0	0	0	0	0	0	0
Eucgr.C01522	5.90184	9.03611	8.12375	3.97428	4.34621	5.41621	10.454	8.36779	10.259	2.40113	2.45194	2.92746
Eucgr.G03407	17.4974	17.6325	20.8317	13.084	12.9308	11.4268	18.1589	15.401	15.5052	8.78425	8.83364	8.85175	LOC104454683	protein EMSY-LIKE 3
Eucgr.K02153	0	0	0	0.15418	0.055634	0.202425	0	0	0	0	0	0
Eucgr.L01552	0	0	0	0	0	0	0	0	0	0	0	0	LOC104429711	LRR receptor-like serine/threonine-protein kinase EFR
Eucgr.E01829	0	0.679252	0.48826	0.836058	1.05253	1.41791	4.96873	3.57781	5.17067	1.57315	1.76203	1.82285
Eucgr.E00544	0	0	0	0	0.232906	0	0	0	0	0.063049	0	0
Eucgr.B01382	35.0754	45.1979	40.2404	34.8275	42.8446	37.6593	46.9648	38.5217	46.1708	27.04	26.9464	29.9998	LOC104426679	protein PELOTA 1
Eucgr.A00797	1.20989	0.66552	0.920885	0.317531	0.738967	0	0.592494	0.195142	0.374407	0.044601	0.168716	0.1305
Eucgr.J00697	20.7635	45.8234	23.5627	81.3613	66.7414	35.4534	17.2766	17.9377	16.7431	57.5977	57.8456	58.8518	LOC104423471	protein LATERAL ROOT PRIMORDIUM 1
Eucgr.A00936	81.2105	85.867	75.4247	36.0078	40.9789	39.7581	12.6188	10.3527	12.3053	24.2533	22.1854	25.6949	LOC104433819	anthocyanidin 3-O-glucosyltransferase 2
Eucgr.F02479	707.048	1563.44	578.207	190.269	143.833	157.784	1034.13	1790.12	1770.69	114.986	115.033	125.149	LOC104449414	allene oxide cyclase, chloroplastic
Eucgr.B00022	10.8095	14.7598	12.7607	13.2589	12.0524	10.7684	18.357	17.0094	18.2778	11.7877	13.619	12.432	LOC104416012	hypothetical protein
Eucgr.B01323	2.63494	4.05095	3.10789	0.775706	1.41585	0.380537	2.51665	3.86799	3.40894	0.599739	0.568728	0.545952	LOC104426246	uncharacterized LOC104426246
Eucgr.E01304	0	0	0	0	0	0	0	0	0	0	0	0
Eucgr.H03134	4.3987	4.55615	4.71616	15.0039	16.9703	17.5384	0	0	0	0	0	0
Eucgr.F01473	34.8854	29.545	35.8801	29.6486	26.9256	19.5226	33.0051	32.5018	28.6222	47.9582	48.9675	46.8539	LOC104448681	uncharacterized LOC104448681
Eucgr.E03566	0	0	0	0	0.258599	0.15889	0	0	0	0.050478	0.115576	0	LOC104447372	(3S,6E)-nerolidol synthase 1
Eucgr.A01569	0	0	0	0	0	0	0	0	0	0	0	0
Eucgr.A00604	1.38723	0.980598	1.56675	0.974733	0.68203	0.855872	3.30682	2.09113	1.55301	0.267466	0.049938	0.136568	LOC104453202	lectin-domain containing receptor kinase VI.4
Eucgr.J02387	39.4024	45.4308	36.5519	22.8971	18.1342	21.5882	21.5526	23.2857	27.7406	28.4369	33.061	28.2463	LOC104422730	thioredoxin H-type
Eucgr.I02349	1.52145	0	7.0651	1.53256	2.45803	8.97129	17.1272	15.7643	17.9687	105.783	96.8621	96.9578	LOC104419660	snakin-2
Eucgr.C01822	0	0	0	0	0	0	0	0	0	0	0	0
Eucgr.K03095	0	0	0	0	0	0	0	0	0	0	0	0
Eucgr.F02941	0.931486	1.54864	1.85315	15.9345	8.11391	2.70975	3.30097	2.69033	2.24958	20.6661	22.6286	20.0946	LOC104449794	endoglucanase 3
Eucgr.J02365	0	0	0	0	0	0	0.223968	0.094103	0.158443	0.067709	0	0.156606
Eucgr.J03194	0	0	0	0	0	0	0	0.060255	0	0	0	0	LOC104424221	protein STRUBBELIG-RECEPTOR FAMILY 5
Eucgr.K01919	92.5057	75.0273	81.2978	104.623	101.745	105.129	58.3321	70.4646	69.8331	116.94	114.554	123.135	LOC104425564	uncharacterized LOC104425564
Eucgr.D00906	0.071426	0.048024	0.070377	0	0	0	0.63571	0.879905	0.843703	0	0	0	LOC104442771	G-type lectin S-receptor-like serine/threonine-protein kinase RKS1
Eucgr.F03540	28.8977	35.1366	29.8054	11.0668	11.2263	8.76109	34.9613	28.7496	30.0932	16.8072	19.3904	18.6516	LOC104450302	cytoplasmic tRNA 2-thiolation protein 1
Eucgr.C02097	0.360873	0.921047	0.255902	0.279916	0	0	1.16066	1.29825	0.757699	1.22529	0.572706	0.500527
Eucgr.C00006	6.17518	15.4113	10.6261	6.20439	4.55082	5.83734	3.57037	4.40194	3.32809	1.20828	1.31685	0.777206	LOC104435768	hypothetical protein
Eucgr.K03388	6.73366	5.64587	7.8119	11.1052	11.5052	7.67011	11.3146	12.2356	9.25806	24.3077	24.973	25.9694	LOC104426680	uncharacterized LOC104426680
Eucgr.H04209	0.013014	0	0.214437	0.039798	0.117375	0	0.152291	0.353281	0.178882	0.022674	0	0.296407
Eucgr.L00562	0.415626	0.085965	0	0.903298	0.829297	0.905783	0.375988	0.449332	0.496758	0.521789	0.456205	0.592105	LOC104428610	LEAF RUST 10 DISEASE-RESISTANCE LOCUS RECEPTOR-LIKE PROTEIN KINASE-like 1.1
Eucgr.B03446	0	0.219545	0	0.450759	0.317548	0	0	0	0	1.72931	2.02803	0.662698
Eucgr.D01820	207.792	309.986	235.817	50.8358	48.5117	37.4347	165.939	145.151	176.963	122.233	121.223	119.695
Eucgr.A00930	2.21651	0.600307	1.34623	0	0	0	0	0	0	0	0	0
Eucgr.D02003	1.71925	2.15066	1.33833	1.03004	1.17021	1.06928	5.31199	4.81382	4.64819	2.23058	2.1981	2.11323	LOC104443157	putative 3,4-dihydroxy-2-butanone kinase
Eucgr.H04106	14.8429	24.0934	20.6186	7.32492	8.20624	8.86367	17.0185	17.5065	21.7705	17.5653	18.1106	16.5231	LOC104415281	trafficking protein particle complex subunit 4
Eucgr.E03462	0.899925	0.608865	0.251203	6.38454	5.4109	3.46012	0.499129	1.67043	0.471116	5.89788	5.45963	4.20598	LOC104445359	B3 domain-containing protein Os07g0563300
Eucgr.G02607	104.626	79.8474	81.3731	148.169	185.736	253.369	26.7787	39.7517	27.412	64.7829	65.975	65.2979	LOC104454032	uncharacterized LOC104454032
Eucgr.H02669	0	0	0	0	0	0	0	0	0	0	0	0
Eucgr.C01687	10.0243	13.686	7.20611	533.664	562.184	535.065	28.5647	22.311	24.5546	260.579	268.449	261.584
Eucgr.G01798	2.85909	2.22126	2.3723	1.65573	1.47151	1.93335	2.48591	2.01709	1.85605	1.13971	1.47204	2.08293	LOC104453445	pentatricopeptide repeat-containing protein At1g62260, mitochondrial
Eucgr.K01565	0	0	0	0	0	0	0	0	0	0	0	0
Eucgr.E00902	0	0	0	0	0	0	0	0	0	0	0	0
Eucgr.C04016	11.6299	14.9923	11.4058	12.2517	9.27992	6.54097	6.13099	7.54893	10.0085	5.52302	4.27656	4.61633	LOC104438386	probable sarcosine oxidase
Eucgr.I00772	0	0	0	0	0	0	0	0	0	0	0	0
Eucgr.J00208	4.40553	5.19113	4.54296	0.104856	0	0	2.52575	5.09391	3.25384	0.820266	0.843621	0.916051	LOC104421076	phosphoinositide phospholipase C 2
Eucgr.F02068	7.98837	10.9794	9.15235	2.4623	2.29352	1.67331	5.43883	6.44836	7.14655	2.45178	2.18026	1.84665	LOC104449138	DNA-dependent metalloprotease WSS1
Eucgr.F00486	0	0	0	0	0	0	0	0	0	0	0	0	LOC104448073	probable glucan 1,3-beta-glucosidase A
Eucgr.I00151	2.70557	2.24777	3.0789	1.59868	1.43241	2.21411	3.3204	2.66957	2.73925	2.58121	3.17968	2.36684	LOC104420125	F-box/kelch-repeat protein At3g23880
Eucgr.A01660	0	0	0	0	0	0	0	0	0	0	0	0
Eucgr.G02400	0	0	0	0	0	0	0	0.062311	0.06028	0	0	0	LOC104453858	chaperonin 60 subunit beta 4, chloroplastic
Eucgr.D01664	0.141717	0.320413	0.315586	0	0.112956	0.252125	0.315359	0.14942	0.096144	0.350002	0	0.255832	LOC104441597	pyridine nucleotide-disulfide oxidoreductase domain-containing protein 2
Eucgr.C00230	29.1314	41.7936	34.9386	40.7637	38.9095	27.5684	46.875	32.6771	33.1593	25.5851	27.3946	26.4165	LOC104436009	autophagy-related protein 18b
Eucgr.I00380	5.62541	19.3137	6.11118	3.43205	2.52847	0.921392	5.04287	4.6268	4.30085	3.61876	3.61457	3.19129
Eucgr.L02786	0	0	0	0.318014	0	0	0.37055	0	0.826889	0.672139	1.02075	0.53089
Eucgr.I02730	85.9178	97.2651	97.4678	52.7328	49.6056	30.3052	70.3412	68.7483	64.8101	27.5157	27.2237	27.2288	LOC104419967	importin-4
Eucgr.L02805	3.67294	3.72134	3.56681	0.740506	1.52505	1.53101	14.2114	17.0422	18.1798	8.03292	7.0247	7.36475
Eucgr.F02178	0	0	0	0	0	0	0	0	0.144216	0	0	0
Eucgr.E00037	10.9079	23.4089	11.4771	88.1947	73.1223	77.74	15.2234	10.172	9.90931	54.8415	57.2078	60.9945	LOC104443348	dof zinc finger protein DOF2.5
Eucgr.K01606	14.4854	14.7433	10.3144	177.343	138.367	98.9022	36.5564	35.3585	30.0963	208.426	210.571	217.265	LOC104427434	UPF0481 protein At3g47200
Eucgr.G01218	1.11353	2.50386	1.40017	1.02649	1.77133	1.95454	4.29233	2.74549	2.54313	3.06632	3.22592	2.89842	LOC104453083	DNA polymerase kappa
Eucgr.G03393	0.824033	0.57128	3.29498	12.6881	3.74706	1.2459	1.71295	2.71972	0.851532	6.63345	5.09735	5.86771	LOC104454669	DNA-damage-repair/toleration protein DRT100
Eucgr.B03455	177.128	133.176	164.063	76.8568	75.5209	87.5812	76.6462	104.253	101.438	68.2638	79.9282	84.3792	LOC104433639	signal recognition particle subunit SRP72
Eucgr.F01361	7.33453	7.73867	10.1798	8.48358	7.65725	7.07502	23.4327	21.9653	28.7972	5.05961	3.66898	4.55456	LOC104451591	probable leucine-rich repeat receptor-like serine/threonine-protein kinase At3g14840
Eucgr.E03203	0.523755	0.358802	0.49647	1.04454	0.756485	0.772308	2.2531	2.52856	1.9312	3.13449	3.59802	3.40839	LOC104445217	putative disease resistance protein RGA1
Eucgr.A00046	1.23628	3.56396	1.58971	2.40625	1.89096	0.845456	3.94254	4.29516	4.04881	2.23216	2.73343	2.14113	LOC104421187	uncharacterized LOC104421187
Eucgr.F04396	0	0	0	0	0	0	0	0	0	0	0	0
Eucgr.C03295	156.981	140.389	126.232	68.9296	71.7036	57.8943	174.01	135.174	149.78	58.6704	63.9428	62.2903	LOC104438010	20 kDa chaperonin, chloroplastic
Eucgr.C01436	0.10364	0.151259	0.055625	8.11729	9.07022	6.71293	0	0.052708	0	0	0	0
Eucgr.A02341	8.08473	18.215	10.04	10.4376	7.99007	6.15685	10.9217	10.3671	11.1727	10.7699	8.09062	7.85118	LOC104444905	AP2-like ethylene-responsive transcription factor At2g41710
Eucgr.H02221	43.3884	64.0493	51.4452	87.1663	73.0599	79.9624	58.4612	73.7215	75.9457	62.4783	62.9506	62.3898
Eucgr.H03468	0	0	0	0	0	0	0.07695	0	0	0	0	0
Eucgr.K00795	1.85215	4.01315	2.1777	0.148364	0.110763	0.114762	9.19313	6.5729	8.64954	0.698498	0.613655	0.332085	LOC104424756	2-alkenal reductase (NADP(+)-dependent)
Eucgr.B00687	0	0	0	0	0	0	0	0	0	0	0.13213	0	LOC104421376	coatomer subunit beta'-1-like
Eucgr.H01077	1.82878	2.44774	4.66665	1.83638	2.43884	1.38105	2.79084	2.35353	2.26438	3.15627	2.7905	3.46445	LOC104456727	hypothetical protein
Eucgr.J00250	16.1886	16.3439	15.7409	2.75574	1.91115	2.57059	7.51661	10.2524	6.79558	1.49625	0.83925	0.94294	LOC104421119	myb-related protein B
Eucgr.C00247	459.596	449.318	486.611	184.536	156.826	177.742	303.683	320.903	309.615	115.924	120.327	111.124	LOC104436025	eukaryotic translation initiation factor
Eucgr.F01122	1.27899	0.397653	0.815949	26.9064	18.4893	18.9872	6.82617	4.26328	4.608	12.1023	13.9055	11.5253	LOC104451511	uncharacterized LOC104451511
Eucgr.E02291	0	0	0	0	0.149457	0	2.8689	2.02584	2.74636	2.01127	1.49758	1.57659
Eucgr.C04151	2.19833	1.82553	2.50736	8.0904	6.82822	7.20513	16.8092	15.3776	13.374	2.75897	2.84532	3.06018	LOC104438484	probable inactive receptor kinase At2g26730
Eucgr.F04347	33.7594	34.647	30.3318	15.8029	15.9493	15.7329	27.0837	25.8902	25.2726	20.8367	23.3474	21.2525	LOC104450931	F-box protein 7
Eucgr.H02072	0.70137	1.8147	0.702113	0.117127	0.471463	0.271271	0.652807	0.355258	0.586315	0.630053	0.39696	0.420947
Eucgr.I02607	0.450695	0.565453	0.480882	1.82086	1.7703	1.35133	0.179824	0	0.306239	0.16527	0.238452	0.374454	LOC104420836	anthocyanidin 3-O-glucosyltransferase 7
Eucgr.B03884	9.70399	8.957	10.4511	6.83819	7.85887	6.43588	12.1563	9.81545	9.7873	3.01207	3.54749	3.53873	LOC104434006	uncharacterized LOC104434006
Eucgr.L02467	0	0	0	0	0	0	0.11473	0	0	0.082294	0	0
Eucgr.C02260	39.0315	49.8951	44.793	10.0583	6.6194	6.08366	15.2871	17.5603	13.4807	7.56389	7.25308	7.76353	LOC104437354	probable 18S rRNA (guanine-N(7))-methyltransferase
Eucgr.E03517	41.536	34.6645	36.2703	40.3395	40.2533	28.1959	23.4789	21.065	19.6642	25.5123	26.0994	26.6683	LOC104445404	putative esterase YitV
Eucgr.H04442	11.1959	2.69395	9.56458	0	0.094841	0	1.86173	2.33842	1.87528	0	0	0
Eucgr.F01155	18.3956	17.0708	19.7613	64.878	50.4227	32.0136	11.1924	16.4774	14.8407	17.7389	17.7439	18.6179	LOC104448471	phytosulfokine receptor 2
Eucgr.C04065	15.0898	15.0038	17.7898	9.137	11.7609	9.59967	12.1651	12.6155	11.7786	13.4985	13.8944	15.1958	LOC104438432	clumping factor A-like
Eucgr.B00856	563.369	720.137	665.614	224.405	194.819	139.429	461.735	423.841	441.986	270.543	281.4	282.325	LOC104422039	guanine nucleotide-binding protein subunit beta-like protein
Eucgr.A01891	186.108	169.976	205.98	187.599	235.609	324.86	231.755	212.847	239.779	122.941	119.347	131.291
Eucgr.L03519	0	0	0	0	0	0	0	0	0	0	0	0
Eucgr.K00294	68.1873	134.863	74.5986	4.93577	5.70984	4.66586	38.8084	49.997	59.3603	9.4859	11.9863	12.6223	LOC104426981	beta-carotene 3-hydroxylase, chloroplastic
Eucgr.J02804	5.17972	4.74261	6.1935	58.4495	81.8752	118.341	19.731	18.5249	25.8063	79.1097	77.9875	77.0652	LOC104422975	uncharacterized LOC104422975
Eucgr.H05030	1.00151	0.866378	0.96659	1.08842	1.02709	0.812334	0.266529	0.391167	0.230122	0.99263	0.358622	0.848591	LOC104415937	disease resistance protein RPS2
Eucgr.A00672	0	0	0	0	0	0	0	0	0	0	0.077288	0.083702	LOC104453474	UPF0481 protein At3g47200
Eucgr.F03819	0	0	0	0	0	0	0	0	0	0	0	0
Eucgr.A00378	319.338	376.786	355.575	185.278	163.417	117.257	272.71	261.948	299.056	236.585	250.54	239.383	LOC104452151	60S acidic ribosomal protein P2A
Eucgr.I01573	0.307144	0.295548	1.28126	0.090797	0.233969	1.3097	1.23159	0.408319	0.7965	0.558078	0.364923	1.56292
Eucgr.C00782	0.06101	0.121943	0	0.042879	0.055451	0	0	0.048223	0	0.031157	0.171495	0.139388	LOC104438999	beta-galactosidase 15
Eucgr.A00275	4.08094	7.21471	4.37694	3.1536	6.02917	5.2381	8.74564	8.91177	7.26163	5.43908	4.15869	5.50891
Eucgr.H00672	33.3736	25.9019	22.6612	10.4173	9.66332	15.7394	15.8667	22.0517	16.454	9.48099	9.38556	9.09069	LOC104456448	hypothetical protein
Eucgr.J01936	70.4789	47.2785	58.8439	4.10416	3.25166	3.28434	62.4734	81.4965	73.1326	1.00532	3.04261	2.15277
Eucgr.C04343	0	0	0	0.030942	0.056395	0	0	0	0	0	0	0	LOC104440547	G-type lectin S-receptor-like serine/threonine-protein kinase LECRK3
Eucgr.K02580	0	0	0	0	0	0	0	0	0	0	0.268967	0.124475
Eucgr.D00509	2.41755	2.45605	3.55766	11.1821	8.72507	9.3398	8.90342	7.93769	10.4523	32.6426	31.9705	34.4337	LOC104440911	transcription factor bHLH30
Eucgr.C02802	39.0293	43.708	52.3173	7.80427	5.42472	11.3146	41.9772	34.0598	36.0714	11.0163	10.8724	11.4342	LOC104437684	transcription factor HY5
Eucgr.A02812	2.87099	3.00855	1.97736	0.563821	0.462191	0.430461	3.48262	2.94482	5.09544	0	0.131017	0.119067	LOC104449058	dihydrodipicolinate reductase-like protein CRR1, chloroplastic
Eucgr.B03626	19.2079	9.91488	19.6956	165.874	394.55	436.502	39.8544	42.5496	26.0302	615.701	599.261	607.669	LOC104433793	transmembrane protein 45A
Eucgr.E01389	14.214	6.23722	1.29157	1.34909	2.37795	6.43483	36.8996	56.1004	50.6925	6.10023	4.48942	3.84119	LOC104444331	thaumatin-like protein 1
Eucgr.K02516	0.320482	0	0	3.07942	1.68015	2.43473	0	0	0.158262	0	0	0
Eucgr.G03169	42.7248	32.2693	31.0689	35.5708	35.9162	28.0256	29.8399	27.2325	28.0346	41.0083	41.6995	38.4659	LOC104454484	quinone oxidoreductase-like protein 2 homolog
Eucgr.C04106	0.144697	0	0.346397	0.711781	0.513647	0.21753	0.111444	0	0	0.467618	0.46034	0	LOC104438449	uncharacterized LOC104438449
Eucgr.I01706	33.1473	45.9318	41.4845	11.195	10.2597	8.59827	29.3501	28.4126	31.8836	19.4302	18.6068	18.3557	LOC104419188	mitochondrial inner membrane protease ATP23
Eucgr.H02354	0.531284	1.09535	0.353098	0.760663	0.192036	0.700402	0.491133	0	0.159949	0.003137	0.073173	0
Eucgr.D01375	4.87728	3.32177	4.66332	1.02826	0.681913	0.522888	1.03057	1.26693	1.27383	0.211796	0.296466	0.526328
Eucgr.H03539	227.812	122.498	206.066	427.581	666.209	1073.4	149.788	252.4	203.98	314.176	324.173	319.936	LOC104414856	sugar transport protein 13
Eucgr.D01559	0	0	0	0	0	0	0	0	0	0	0	0	LOC104443037	probable LRR receptor-like serine/threonine-protein kinase At3g47570
Eucgr.B02625	32.1911	46.7673	38.2129	20.372	19.7936	12.6923	52.0279	47.7427	53.3285	12.7884	15.0001	12.8295	LOC104432985	protein CHROMATIN REMODELING 19
Eucgr.J01352	0.234182	0.150889	0	0.090713	0.090384	0.094276	0.155312	0.078868	0.242518	0.402632	0.084492	0.491127
Eucgr.C02381	0	0	0	0	0.208587	0	0	0	0	0.170389	0.077302	0.077374	LOC104439650	vinorine synthase
Eucgr.H01134	0.585656	0.38892	0.391028	1.759	2.16993	2.93167	0.122732	0.20562	0.079763	0.677673	1.04331	0.536129	LOC104456770	cytochrome P450 89A2
Eucgr.G02018	1.26624	1.88475	1.55437	7.94905	7.53966	3.85547	17.0847	13.9307	16.422	21.1345	19.7056	21.7474
Eucgr.L01850	13.6658	15.019	24.2761	43.607	57.067	120.726	77.6386	56.6083	40.2315	54.9705	55.3136	63.519	LOC104430041	glutathione S-transferase U25
Eucgr.A00635	0.308529	0.985166	0.640499	0	0.078684	0	0	0.137319	0	0	0	0	LOC104427713	solute carrier family 40 member 2
Eucgr.F03318	4.35049	3.67335	4.59772	6.40609	6.07077	11.6045	25.2777	17.9236	18.7268	1.74052	1.15989	1.33712	LOC104450132	dynein light chain, cytoplasmic
Eucgr.E01673	0	0	0	0	0	0	0	0	0	0	0	0	LOC104446395	probable leucine-rich repeat receptor-like protein kinase At1g35710
Eucgr.F02866	0.382263	0.870883	0.790244	0.355105	0.186361	0.128401	0.281774	0.185202	0.057483	0.349785	0.368359	0.328781	LOC104449726	sodium transporter HKT1
Eucgr.G01796	31.4833	35.5372	37.7261	27.3049	31.5187	33.3122	35.4992	36.0295	35.448	29.9835	31.7559	30.6314	LOC104453444	DDB1- and CUL4-associated factor 8
Eucgr.E00806	96.6004	95.0548	100.764	41.4182	39.0791	36.9989	69.6878	76.2084	75.7874	28.7085	28.5217	27.5968	LOC104443940	calcium-dependent protein kinase 1
Eucgr.G00951	0	0.079733	0.045792	0.063913	0	0	0.043334	0	0	0	0.048368	0
Eucgr.C01642	0	0	0	0.113461	0.112296	0.60059	0	0	0	0.161299	0	0
Eucgr.G00305	0	0	0	0.310474	0.1423	0.054854	0.504107	0	0	0.034535	0.235745	0.105379
Eucgr.E02464	6.13782	8.22117	7.47952	6.2203	5.44347	6.78635	17.1931	17.9739	14.7699	12.4079	11.2984	11.9055	LOC104444874	F-box protein SKIP19
Eucgr.J00106	13.7532	11.3018	8.72305	87.788	68.5725	56.5303	23.523	26.1945	19.5549	101.798	96.8396	98.0556	LOC104420978	probable WRKY transcription factor 70
Eucgr.A02030	8.19066	14.3534	8.02669	0.795736	0.536504	0.246698	3.39219	4.20027	7.39168	0.398445	0.421089	0.362468	LOC104442309	phytoene synthase 2, chloroplastic
Eucgr.B03284	626.526	362.751	456.989	460.428	482.808	520.413	115.644	140.133	107.834	230.8	224.78	226.557	LOC104433500	uncharacterized LOC104433500
Eucgr.J03024	0	0	0	0	0	0	0.103247	0.875503	0.268308	0.018922	0	0
Eucgr.B03349	198.23	149.786	171.961	131.257	135.83	136.113	214.037	204.309	237.419	102.135	103.961	100.332	LOC104433549	aldehyde dehydrogenase family 2 member B7, mitochondrial
Eucgr.E04136	0	0	0	0	0	0	0	0	0	0	0	0	LOC104447633	G-type lectin S-receptor-like serine/threonine-protein kinase At1g61370
Eucgr.A01371	18.2657	28.2334	24.1071	7.55075	5.83217	3.88519	13.6801	13.248	15.6225	2.92958	3.94911	4.03378	LOC104437099	zinc finger protein CONSTANS-LIKE 9
Eucgr.C00929	4.96048	4.06142	4.61713	2.23331	1.00828	2.22184	9.67224	9.43865	9.01998	3.11789	2.61234	2.88121	LOC104436518	F-box/LRR-repeat protein At4g29420
Eucgr.I01364	0	0	0	0	0	0	0	0	0	0	0	0	LOC104420561	uncharacterized LOC104420561
Eucgr.K03272	0.225078	0.584942	0.89616	0.392776	0	0.287331	0.11233	0.307306	0	0.106443	0	0	LOC104426584	1-aminocyclopropane-1-carboxylate oxidase homolog 1
Eucgr.H00906	41.6172	106.56	33.9	5.49565	24.3713	18.3686	129.221	274.667	213.043	18.6164	17.271	21.3883	LOC104456619	galactinol synthase 2
Eucgr.D02473	22.9711	34.4182	28.2893	9.11651	9.56542	10.2048	21.4493	18.3446	22.752	12.5663	14.1621	11.567	LOC104442257	Golgi SNAP receptor complex member 1-2
Eucgr.E00040	1.33478	0.465808	1.43249	4.14795	6.42054	6.05444	2.49407	4.77645	2.3685	5.45384	6.35299	5.90414	LOC104443349	laccase-6
Eucgr.K00843	1.11173	1.19666	1.64863	12.8	12.4211	10.8691	0.279836	0.142102	0	0.987955	0.96801	1.90329
Eucgr.F04422	0	0	0	0	0	0	0.761814	0.891359	1.57455	0	0	0	LOC104450997	transcription factor MYB114
Eucgr.L02453	0	0	0	0	0	0	0	0	0	0	0	0	LOC104430687	G-type lectin S-receptor-like serine/threonine-protein kinase At1g61370
Eucgr.B00501	17.5294	16.6934	14.9424	20.3715	19.9259	12.8844	15.8812	15.9878	15.0484	16.9665	15.5107	15.6908	LOC104419731	uncharacterized LOC104419731
Eucgr.K01087	20.0881	12.0988	21.4635	17.9462	13.3798	21.4104	31.5393	27.8316	29.7702	7.52037	8.01124	7.14467	LOC104424976	E3 ubiquitin-protein ligase ATL41
Eucgr.C02765	17.9609	14.8783	10.2635	2.94391	3.65741	3.81094	10.3369	16.0697	10.6138	9.63585	7.20877	7.57359	LOC104439868	uncharacterized LOC104439868
Eucgr.F01541	35.2541	28.3336	27.6475	94.2491	93.2369	75.3961	20.4103	21.775	17.1599	117.021	109.068	110.177	LOC104448733	protein BRASSINAZOLE-RESISTANT 1
Eucgr.H04414	0	0	0	0	0	0	0	0.473423	0	0.444181	0.275948	0.752636
Eucgr.H01405	0.094637	0.250621	0.358935	0.064337	0.178831	0.235958	0.271933	0.154586	0	0	0	0.093197
Eucgr.B02714	0	0.463831	0.057626	0.496572	0.335618	0.189721	0.161115	0.516734	0.152863	0.101382	0.143064	0.232057
Eucgr.H01798	0	0	0	0	0	0	0	0	0	0	0	0
Eucgr.G01972	0	0	0	0.101133	0.075701	0	0	0	0	0	0	0
Eucgr.A01835	0.499432	0.77393	0.345964	8.37724	7.62444	2.24755	0.673659	0.874876	0.713449	15.3896	16.593	16.7519	LOC104440833	protein TPX2
Eucgr.F00737	17.9319	29.9201	23.8104	13.3943	18.1834	18.4668	25.9922	25.2351	21.51	12.4465	11.7965	12.3954	LOC104448209	splicing factor, suppressor of white-apricot homolog
Eucgr.H01023	2.37209	2.09925	2.59148	3.95246	3.45463	3.64924	3.0015	3.02049	2.82655	23.1422	22.5045	23.7794	LOC104416393	putative disease resistance RPP13-like protein 1
Eucgr.L02715	8.64443	11.1567	10.6309	9.77613	7.47675	2.62068	18.9051	14.3294	13.4832	3.59106	3.33608	3.826
Eucgr.E03365	0.058543	0.029907	0.131978	0.145782	0.397995	0.471695	0.167231	0.310953	0.164829	0	0	0
Eucgr.C03059	18.8304	13.3347	24.6264	30.4385	31.0563	31.0386	22.1031	18.5856	16.0876	40.3796	38.9291	36.8191	LOC104437857	uncharacterized LOC104437857
Eucgr.L00132	0	0.30375	0.081801	0.226054	0	0.087907	0	0	0	0	0	0	LOC104428170	ankyrin repeat-containing protein At2g01680
Eucgr.K02651	4.2173	2.03661	5.03662	1.81769	2.35148	1.53979	1.47024	3.05068	2.86077	1.27879	2.26932	1.19523	LOC104426097	oleosin 1
Eucgr.H02796	0	0	0	0	0	0	0	0	0	0	0	0	LOC108954419	cell number regulator 2-like
Eucgr.H01621	0	0	0	0	0	0	0.080075	0	0.051068	0	0	0	LOC104416609	TMV resistance protein N
Eucgr.D01011	0	0.101295	0	0.170774	0	0.353604	0.104963	0.147713	0.121941	0.117866	0	0.100962
Eucgr.D00593	0	0.304007	0	0.682348	1.28063	0.319463	0	0.172961	0	7.0567	4.23684	5.17523	LOC104440987	NAC domain-containing protein 73
Eucgr.I01414	74.4432	81.961	73.2652	47.5373	44.0219	38.1531	66.6348	61.3161	60.8996	60.4455	56.0772	55.5923	LOC104418942	rac-like GTP-binding protein 5
Eucgr.B03328	0.075122	0.289933	0	0	0	0	0	0	0	0	0	0	LOC104435630	polygalacturonase non-catalytic subunit AroGP2
Eucgr.H01021	0	0	0	0	0	0	0	0	0	0	0	0
Eucgr.L00714	0	0	0	0	0	0	0	0	0	0	0	0	LOC104428779	uncharacterized LOC104428779
Eucgr.A00691	38.0739	46.7396	54.1549	28.8869	57.2521	64.1609	93.3844	81.3872	82.2905	110.153	114.09	110.452
Eucgr.F03998	202.077	214.419	213.323	42.3289	42.142	31.8523	142.094	159.84	141.497	63.1719	63.0178	60.4757	LOC104450666	nucleolar GTP-binding protein 1
Eucgr.A01724	9.87664	12.071	10.2627	8.04062	7.33404	10.108	5.88343	4.87187	6.72666	4.86015	4.72245	6.00509	LOC104439805	uncharacterized LOC104439805
Eucgr.G00327	1.06864	2.02743	2.3544	1.68144	0.957136	1.55585	5.14052	3.14502	3.86928	2.4802	2.59458	2.6958
Eucgr.K02846	4.43709	3.97352	4.3798	5.53766	3.07658	1.92415	2.44713	3.11324	2.91959	2.17141	1.93688	2.79438	LOC104426270	serine/threonine-protein kinase HT1
Eucgr.A02227	7.47132	11.2358	6.73499	8.32564	8.69631	5.54035	11.5283	8.3957	9.90323	6.22348	6.45919	7.92326	LOC104443925	hydroxymethylglutaryl-CoA lyase, mitochondrial
Eucgr.I01175	3.43156	3.07255	2.68959	10.3523	16.7119	7.72954	6.18841	5.01474	4.36768	20.2467	23.3804	22.6479	LOC104418761	uncharacterized LOC104418761
Eucgr.E02875	0.460129	0.345541	0.680281	0.49345	0.600188	1.62682	3.06435	3.54559	2.71862	0.846232	1.64973	0.830316
Eucgr.C00822	60.5935	73.8219	71.2595	76.1485	86.0085	75.2737	87.092	80.1484	97.0969	34.9159	36.6507	35.3763
Eucgr.D02378	28.0856	25.5941	27.4442	76.233	84.0133	81.0349	32.8852	30.8648	33.0071	67.0076	68.5812	70.237	LOC104442181	phosphatidylinositol 4-kinase gamma 4
Eucgr.B03854	22.1044	20.0875	21.6067	15.1732	14.5995	16.4793	22.7062	19.5881	21.4777	9.65903	9.81632	8.15405	LOC104433980	F-box/LRR-repeat protein At1g67190
Eucgr.A01642	0	0	0	5.38153	3.3792	4.27735	0	0	0.1534	22.9463	23.7542	20.9268	LOC104439188	alpha carbonic anhydrase 7
Eucgr.B02953	163.46	125.034	120.508	95.0447	78.987	72.0354	102.005	114.664	98.3274	127.346	127.066	133.612	LOC104433237	uncharacterized LOC104433237
Eucgr.H02074	0	0	0	0	0	0	1.02284	0	0	1.79454	1.63786	1.90585
Eucgr.F03221	14.8236	12.0965	17.3605	7.34883	7.00216	5.07123	11.9722	9.24706	12.404	8.47088	7.8331	9.19823	LOC104450054	uncharacterized LOC104450054
Eucgr.C01755	0	0	0	0	0.079929	0	0	0	0	0	0	0
Eucgr.L03025	0	0	0	0.157516	0.04811	0.025881	0.548221	0.036238	0.289432	0	0	0
Eucgr.H00683	7.81428	11.4002	10.5333	8.92953	5.56474	6.99608	4.71717	5.361	3.69081	3.62661	4.38355	4.73894	LOC104456458	F-box/LRR-repeat protein 12
Eucgr.C04088	20.0947	22.0314	21.1252	37.1562	31.2366	29.475	18.9025	13.8559	13.9889	31.7721	38.022	34.2257	LOC104438437	probable E3 ubiquitin-protein ligase RHY1A
Eucgr.F00612	3.87817	5.39479	5.65969	17.7345	16.2124	9.0483	0.109602	0	0.178591	0.382395	0.382782	0.366966	LOC104448150	serine/threonine-protein kinase/endoribonuclease IRE1a
Eucgr.E03166	0.32679	0.750678	0.349265	0.982776	0.979057	0.38935	0.244404	0.718285	0.44004	0.93718	1.13807	1.26641
Eucgr.E01806	0	0	0	0	0	0	0	0	0	0	0	0
Eucgr.F02661	12.169	14.8426	13.2029	14.4612	15.8948	12.0393	9.18734	8.18033	9.29748	6.68466	7.33038	8.69167	LOC104449561	BRCA1-A complex subunit BRE
Eucgr.F04378	51.5812	60.1397	55.1422	40.9536	42.2078	34.6973	38.7106	37.2964	39.028	43.7323	41.3229	40.816	LOC104450964	transmembrane protein 50 homolog
Eucgr.E00362	27.4258	24.6009	29.8719	11.82	14.2228	16.9097	31.8613	31.6833	30.2283	15.7667	14.5436	15.0605
Eucgr.F01854	380.845	510.386	416.906	372.065	955.363	1575.76	1174.75	1046.82	977.305	889.878	931.626	904.33	LOC104448981	thioredoxin H1
Eucgr.E04219	0.199705	0.699741	0	5.30066	7.92967	11.8503	0.6457	0.246124	1.36577	1.33331	0.627257	0.668597	LOC104447690	laccase-14
Eucgr.H00198	0	0	0	0	0	0	0	0	0	0	0	0	LOC104416111	uncharacterized LOC104416111
Eucgr.G01982	17.1794	8.28401	8.33313	2.80191	2.79274	4.10111	19.1809	22.8177	15.9935	5.20804	4.57319	3.4793	LOC104453569	uncharacterized protein At4g14100
Eucgr.F02634	44.4405	50.7296	43.0673	1.95235	2.44658	1.47739	19.1039	22.9245	20.4886	2.58656	4.23324	2.40563	LOC104449536	protein ROOT PRIMORDIUM DEFECTIVE 1
Eucgr.E00017	59.7698	67.2091	63.4277	29.0974	30.7009	28.5724	142.195	121.052	149.347	61.4408	66.0514	65.2637	LOC104443329	CBL-interacting serine/threonine-protein kinase 9
Eucgr.E04311	3.73698	1.94877	0.642735	0	0	0	0.605326	0.614775	0.236617	0	0	0
Eucgr.H03924	0	0	0	0	0	0	0.422129	0.545276	0.178696	0	0	0.112293	LOC104417513	inositol 4-methyltransferase
Eucgr.B02741	0.151517	0	0	0.089834	0.705328	0.186103	1.82929	0.652434	0.522868	1.01925	1.14505	1.53645
Eucgr.F02989	0.386343	0.544872	0.2724	0	0	0	0.546305	1.04182	0.697584	0.243251	0.714259	0.230906	LOC104449834	uncharacterized LOC104449834
Eucgr.C03227	0	0	0	0	0	0	0	0	0	0	0	0
Eucgr.E00641	0.323062	0.939498	0.115594	3.01012	1.46529	2.83681	0.64062	0.761613	0	1.32615	2.09621	0.828083	LOC104443833	E3 ubiquitin-protein ligase RHA1B
Eucgr.J02442	5.38839	3.0013	9.76652	4.86515	4.9381	6.19648	3.81347	6.02348	4.26847	1.13705	0.423712	1.23922	LOC104422765	thaumatin-like protein 1b
Eucgr.B00561	0.110193	0.335154	1.25936	0.591046	0.686242	0.227157	1.74314	1.24157	1.37567	0.815841	1.16871	0.662191
Eucgr.C01256	7.92284	7.57936	7.23522	2.98142	2.23646	0.516872	6.00064	5.78973	6.09856	5.89357	7.31788	5.67606	LOC104436734	protein AUXIN RESPONSE 4
Eucgr.K02183	0	0	0	0	0	0	0	0	0	0.069855	0	0	LOC104425751	bidirectional sugar transporter N3
Eucgr.G02077	0.181785	0.188648	0.154089	0	0.225626	0	0.292732	0	0	0	0	0	LOC104455621	putative clathrin assembly protein At2g25430
Eucgr.K00899	0	0	0	0	0	0	0	0	0	0	0	0
Eucgr.A02992	2.55997	4.26699	4.48013	2.78484	2.94569	1.63997	3.22958	2.97438	3.42945	2.91474	3.32155	3.82973	LOC104450603	origin of replication complex subunit 3
Eucgr.C02769	0.613579	0	0.247392	2.51526	1.43692	0.380025	0	0	0.038629	0.491307	0.692727	0.280994
Eucgr.A01559	0.148693	0.210037	0.066282	0	0	0	1.35456	5.59627	4.86486	0	0	0
Eucgr.F00555	0.073795	0.243052	0	0	0.160428	0.286381	0	0	0	0	0	0.124652	LOC104451271	uncharacterized LOC104451271
Eucgr.B02920	0	0	0	0	0	0	0	0	0	0	0	0	LOC104435509	MLP-like protein 328
Eucgr.D00638	474.714	484.119	441.314	551.538	523.591	669.86	953.672	886.529	791.115	1372.17	1358.6	1356.43	LOC104441027	CBS domain-containing protein CBSX5
Eucgr.B03294	0	0	0	0	0	0	0	0	0	0	0	0	LOC104435622	uncharacterized LOC104435622
Eucgr.G01736	94.4134	84.9847	95.0399	98.9637	87.4901	91.5718	59.3871	53.3121	59.5641	52.4113	57.3179	54.9373
Eucgr.K03402	3.31169	4.85506	3.67956	1.17819	1.14596	1.714	24.8974	22.9324	25.1766	4.98357	5.73081	6.48582	LOC104426686	endo-1,3;1,4-beta-D-glucanase
Eucgr.A01603	71.382	30.2754	53.637	1.32915	3.54496	1.16357	64.5319	88.3545	86.6722	2.47122	2.20883	2.35119
Eucgr.D00998	0	0	0	1.0221	0.666931	2.07767	0	0	0	0	0.192328	0	LOC104442806	toll/interleukin-1 receptor-like protein
Eucgr.J01642	4.53619	5.86339	4.75289	2.63753	1.60904	1.03175	3.69239	3.45871	3.78544	1.30678	1.92892	1.54449	LOC104422206	armadillo repeat-containing protein 7
Eucgr.D02372	11.7677	18.2836	15.2332	4.28699	4.18414	3.4369	11.8029	11.3192	12.8455	5.38734	5.6317	6.02173	LOC104443221	histone-lysine N-methyltransferase ATX3
Eucgr.A01000	0	0	0	0	0	0	0	0	0	0.022964	0	0
Eucgr.L02664	0	0	0	0	0	0	0	0	0	0	0	0
Eucgr.I02515	29.1789	36.3543	34.8266	31.7132	30.7631	29.1474	53.0366	49.6553	59.651	64.9655	65.7491	66.6737	LOC104419816	proline iminopeptidase
Eucgr.L00393	0	0	0	0	0	0	0	0	0.506834	0	0	0
Eucgr.A01421	156.155	98.7545	142.6	24.0717	21.4106	17.4092	41.0865	37.9222	33.1385	23.1021	23.3923	19.9019	LOC104455787	pyridoxal reductase, chloroplastic
Eucgr.H00355	0.167498	0	0.084943	0	0.052033	0.439121	0.013005	0.02394	0.097968	0.110898	0.862991	0.231093
Eucgr.H02049	1.0363	2.2984	1.50896	2.42604	5.29892	7.01624	1.5875	1.12724	1.27676	1.97979	1.91466	1.63223
Eucgr.E00448	71.2079	158.54	118.274	308.24	189.934	105.479	277.89	67.7542	74.4625	659.792	665.193	661.917	LOC104443705	14 kDa proline-rich protein DC2.15
Eucgr.K03174	6.13983	2.91293	6.69857	7.36756	4.78616	4.17138	7.2848	3.58367	2.90765	1.16192	0.988524	0.949055	LOC104426504	hypothetical protein
Eucgr.F02810	34.1156	25.1317	22.8547	63.7233	56.0377	52.7061	31.0254	24.8694	31.4069	90.7914	97.8383	90.4884	LOC104449684	uncharacterized LOC104449684
Eucgr.L03286	0.170276	0	0	0.098938	0.389058	0.102823	0	0	0.165316	0	0.074624	0
Eucgr.E04274	0	0	0	0	0	0	0	0	0	0	0	0	LOC104447723	LRR receptor-like serine/threonine-protein kinase GSO1
Eucgr.F03633	44.7582	46.0359	46.9386	32.0955	41.5603	52.119	54.1623	47.7442	51.2268	20.7391	20.5374	21.3327
Eucgr.C02339	0.368932	1.12217	0.130688	0	0	0.07451	0.061375	0.583421	0.296291	0	0	0	LOC104437404	cytosolic sulfotransferase 5
Eucgr.L02883	78.9682	75.1275	75.1873	49.6681	70.6959	67.4264	95.9164	81.3381	81.2823	60.2802	56.0669	41.0758
Eucgr.D01543	0	0	0	0	0	0	0	0	0	0	0	0	LOC104441538	basic form of pathogenesis-related protein 1
Eucgr.F03378	0	0	0	0	0	0	0	0	0	0	0	0	LOC104452091	G-type lectin S-receptor-like serine/threonine-protein kinase At4g27290
Eucgr.I00822	0	0	0	0	0	0	0	0	0	0	0	0
Eucgr.D01546	0	0	0	0	0	0	0	0	0	0	0	0	LOC104441541	basic form of pathogenesis-related protein 1
Eucgr.H01302	0	0	0	0	0.61201	0	0	0	0	0	0	0
Eucgr.I01437	0.317641	0.249796	0.225565	0.023241	0	0	0.021159	0.288415	0	0.316441	0.460344	0.235477
Eucgr.G00958	21.2683	28.3331	27.2932	31.6722	33.896	22.6336	22.4481	21.8421	24.3746	47.2577	49.1731	46.2708
Eucgr.F01589	13.2766	49.411	19.6866	47.6642	51.4192	40.024	22.1033	45.9844	36.4266	78.3912	83.5319	79.9993	LOC104448776	dihydroflavonol-4-reductase
Eucgr.L00548	0	0	0	0.344203	0.303854	0	1.72766	1.78988	1.66107	3.36178	1.52975	4.50235	LOC104428592	uncharacterized LOC104428592
Eucgr.F02780	0	0	0	0	0	0	0	0	0	0.088426	0	0
Eucgr.I01355	0	0	0	0	0	0	0	0	0	0	0	0
Eucgr.A00819	0.130948	0.313676	0.332635	0	0.407115	0	0	0.259297	0.248643	0	0.199646	0.124223
Eucgr.C02832	0	0	0	0	0	0	0	0	0	0	0	0	LOC104439893	protein ECERIFERUM 26-like
Eucgr.H00322	0	0	0.19306	0	0	0.572384	0	0	0.190483	0	0.115114	0.200501
Eucgr.C00981	0.795934	0.563343	0.643109	10.2944	7.82669	6.56247	0.321625	0.488626	0.520578	0.31978	0.267872	0.378847
Eucgr.L01304	243.439	430.272	307.037	38.4632	29.897	41.636	53.6904	55.2972	69.8937	4.12021	2.48284	1.87289
Eucgr.E01318	0	0	0	0.42551	0.089471	0	0.49835	0	0.487443	0	0	0	LOC104444284	zinc finger CCCH domain-containing protein 48
Eucgr.G01154	0	0	0	0	0	0	0	0	0	0	0	0
Eucgr.J00175	0	0.906699	0	1.22117	0	0	0	0.244131	0	0.378857	0.068864	0.699699	LOC104421045	LOB domain-containing protein 12
Eucgr.L03259	0.627092	0.207186	0.33107	9.41503	6.68322	4.75973	6.20429	5.62516	5.395	62.493	72.4538	56.5009
Eucgr.F02422	0	0	0	0	0	0.321328	0.147053	0	0.302511	0	0	0	LOC104451894	early nodulin-like protein 3
Eucgr.B02072	6.84715	9.80599	8.54683	6.16275	6.83863	4.09338	12.7174	6.5588	8.62356	3.80088	3.41976	4.01033
Eucgr.E04114	2.84607	3.04338	4.23815	0.916026	1.01072	1.55942	2.8797	2.24021	3.20431	1.10505	1.45114	0.351389	LOC104447616	pentatricopeptide repeat-containing protein At4g21170
Eucgr.E00084	37.52	30.9427	37.3359	8.10622	8.14062	7.68938	14.6701	15.6996	14.5467	7.42263	6.33171	6.08175	LOC104443393	UDP-D-xylose:L-fucose alpha-1,3-D-xylosyltransferase MGP4
Eucgr.G03106	1152.74	1098.37	1219.95	5004.61	4519	5804.59	1236.33	1397.22	1342	5439.04	5339.23	5473.58	LOC104454432	wound-induced protein 1
Eucgr.H03798	1.18215	1.89151	1.77743	0	0.51172	0	0	0	0	0	0	0
Eucgr.J03086	10.05	11.202	10.6912	24.7743	22.4211	11.5481	14.1402	12.6404	9.55543	24.5948	23.111	22.088	LOC104423197	triphosphate tunel metalloenzyme 3
Eucgr.L00539	0	0	0	0.501083	0.238027	0.156527	0	0	0	1.00453	0.755404	0.429356	LOC104428586	acyl-CoA--sterol O-acyltransferase 1
Eucgr.L03226	0	0	0	0	0	0	0	0	0	0	0	0
Eucgr.H00048	0.609104	1.58409	1.01235	0	0.448019	0.500051	1.21958	0.572131	1.41819	0.146819	0.087253	0.520761
Eucgr.K00052	2.45429	3.52526	1.78816	0	0	0	2.55618	1.48009	1.98665	0	0.233483	0
Eucgr.G03118	6.04683	11.0372	8.39354	6.83565	6.94282	13.4356	5.87349	5.76056	4.45695	8.08431	6.64047	6.59394	LOC104454441	histone H1
Eucgr.G00681	0.113355	0	0	0	0	0	0.481086	1.10573	1.14169	0.346325	0.428151	0.23065
Eucgr.B03702	0	0	0	0	0	0	0	0	0	0	0	0
Eucgr.H03473	0	0.121744	0	0.31861	0.174094	0.117784	0	0	0.092523	0	0	0.134674
Eucgr.E03431	9.3739	12.9952	10.1284	8.53688	7.71317	8.23002	12.6477	10.7058	11.0956	9.13061	8.41293	8.11566	LOC104445338	putative F-box/LRR-repeat protein At5g02700
Eucgr.A02273	0.176571	0.1259	0	0.189308	0.344757	0	0.062852	0.131027	0.33594	0.108729	0	0	LOC104444393	F-box/LRR-repeat protein At3g59210
Eucgr.E00495	0	0	0.184319	0	0	0	0.12231	0.043627	0.63321	0	0	0.091122
Eucgr.B02682	1.11564	0.289829	0.452344	38.7903	34.5781	29.2391	2.00884	2.89749	2.0394	22.1157	27.517	24.791	LOC104433048	probable S-adenosylmethionine-dependent methyltransferase At5g38100
Eucgr.C01104	14.1634	11.9609	15.1264	0.356154	1.3188	0.330796	7.41138	5.98443	5.53921	1.66325	1.43065	2.15738	LOC104436637	uncharacterized LOC104436637
Eucgr.H02744	4.99399	6.99278	5.6513	5.93923	6.56109	7.26399	6.85612	3.61579	5.81361	1.76372	1.8107	1.50464	LOC104414308	F-box/kelch-repeat protein At3g06240
Eucgr.B03934	0.852397	1.23238	1.30079	1.87767	2.2874	1.74159	2.45563	2.82356	2.1266	5.03328	5.32158	4.55207	LOC104434054	uncharacterized LOC104434054
Eucgr.F03446	16.6439	11.9481	17.6742	13.6108	14.6564	7.37812	14.1617	11.6821	10.8435	16.2301	20.1072	18.0861	LOC104450224	protein LHCP TRANSLOCATION DEFECT
Eucgr.F03530	0	0	0	0	0	0	0	0	0	0	0	0
Eucgr.I00569	0.686712	1.11935	1.10984	0.447504	0.879448	0.390745	1.62502	2.96314	1.19075	0.604404	0.381592	0.206466	LOC104418343	dof zinc finger protein DOF5.7
Eucgr.C00250	147.881	142.2	134.629	86.0504	83.5208	65.2228	170.852	134.319	151.44	121.968	112.134	120.747	LOC104436028	UPF0057 membrane protein At4g30660
Eucgr.J02659	0	0	0	0	0	0	0	0	0	0	0	0.370983
Eucgr.I01643	6.61888	8.41307	5.75674	15.5897	12.8814	15.1429	7.17729	5.52739	6.02971	14.1897	15.4837	13.6425	LOC104419135	50S ribosomal protein L27, chloroplastic
Eucgr.I01428	4.05769	3.76056	3.75986	5.84503	4.93066	5.4002	6.58633	5.6746	6.80068	3.81593	5.43749	4.15949	LOC104418957	uncharacterized LOC104418957
Eucgr.A01473	123.095	61.4892	115.061	52.127	42.1531	62.4808	76.4641	95.8341	83.9497	25.1633	27.8986	24.3963	LOC104437884	putative RING-H2 finger protein ATL21A
Eucgr.G02403	0	0.16613	0	0.248014	0	0	0.277104	0.320532	0.0112	0.33389	0.154727	0.284113
Eucgr.F03076	1.7389	3.28072	1.71482	0.76868	0.803739	0.507078	2.25942	1.90794	2.10724	0.167889	0.354995	0.307798	LOC104452027	probable protein phosphatase 2C 51
Eucgr.I00876	0	0	0	0	0	0	0	0	0	0	0	0	LOC104420418	UPF0481 protein At3g47200
Eucgr.E04192	0	0	0	0	0	0	0	0	0.078386	0	0	0
Eucgr.B02497	47.4456	49.4956	42.0672	42.8723	44.5395	30.8002	34.9905	33.8129	43.6468	57.2151	51.9179	57.7107	LOC104432872	uncharacterized LOC104432872
Eucgr.H00984	0.153057	0.394088	0	0	0.678422	0.502564	0.120146	0.259749	0.413291	0	0	0.236971
Eucgr.J00178	1.41533	1.31044	1.5864	0.151142	0	0	0.962817	1.60273	0.575875	0.100159	0	0	LOC104421048	26S proteasome non-ATPase regulatory subunit 10
Eucgr.E04032	0.269387	0.513375	0.648738	0.118235	0.0591	0.304114	1.61121	1.04988	1.69103	0.497255	0.359407	0.437675	LOC104447580	probable F-box protein At4g22030
Eucgr.D00684	123.837	114.034	135.381	246.458	252.502	269.881	248.429	224.361	254.118	205.299	213.008	210.698	LOC104441054	helicase-like transcription factor CHR28
Eucgr.F00016	0	0	0	0	0	0	0	0	0	0	0	0
Eucgr.A00880	6.87487	9.39778	8.08838	2.59968	1.63355	2.22702	5.63229	3.6589	3.9523	1.02681	1.67023	1.13321	LOC104433427	protein LURP-one-related 8
Eucgr.J01653	48.34	40.7307	39.9323	65.7113	60.2551	35.9485	71.0941	69.8963	74.3167	92.7104	100.6	88.2127	LOC104422216	probable 3-beta-hydroxysteroid-Delta(8),Delta(7)-isomerase
Eucgr.E00118	131.039	272.428	108.74	118.014	104.525	82.0334	238.08	288.278	320.301	61.0884	68.332	70.3808	LOC104443429	bifunctional L-3-cyanoalanine synthase/cysteine synthase 1, mitochondrial
Eucgr.J02068	131.266	148.766	134.724	135.382	152.981	113.742	162.725	176.786	180.101	234.003	239.308	238.792	LOC104422510	ras-related protein RABE1c
Eucgr.B02559	3.57015	5.65286	6.0812	3.17547	4.09953	1.78115	3.57295	3.22449	3.67666	3.25873	3.39373	2.72781	LOC104435391	uncharacterized LOC104435391
Eucgr.J02250	1.33231	1.88313	1.15727	2.1011	2.67367	0.57534	1.44955	2.35272	1.50236	5.85199	3.41672	4.43597	LOC104422646	uncharacterized LOC104422646
Eucgr.D00242	0	0	0	2.42117	2.13471	1.92837	0.312667	0.745426	0.320466	6.94736	6.57713	6.85109	LOC104440745	protein BREAST CANCER SUSCEPTIBILITY 1 homolog
Eucgr.A02982	9.13072	26.9669	6.27138	0.599263	1.69481	2.38549	5.88928	7.03603	11.3742	0	0.092742	0	LOC104450503	S-norcoclaurine synthase 1
Eucgr.G02783	61.2393	68.6063	71.5213	16.5297	17.7502	18.6129	42.854	49.3505	49.6906	11.1209	16.2089	15.5461	LOC104454170	probable protein phosphatase 2C 38
Eucgr.E04273	0	0	0	0	0	0	0	0	0	0	0	0
Eucgr.D02248	37.6696	36.0883	35.5023	0.48276	0.222928	0.292159	33.8547	37.1364	35.9408	0.322719	0.128226	0.358072	LOC104442068	homeobox-leucine zipper protein ANTHOCYANINLESS 2
Eucgr.G02229	11.1984	6.85702	7.73323	6.8256	8.33748	10.2365	11.3957	13.5743	14.1465	5.65842	4.63378	4.93026
Eucgr.E01526	0	0	0	0	0	0	0	0	0	0	0	0	LOC108959435	calphotin-like
Eucgr.I00343	21.4852	22.2129	20.9008	18.8739	18.4724	12.7868	40.5817	35.7723	32.5954	40.7413	37.1927	38.9032	LOC104418214	UBP1-associated proteins 1A
Eucgr.B00870	2.87098	0.343843	1.18063	21.4246	10.8956	18.0176	5.74202	3.98965	8.49832	0.380401	0.303537	0.333943	LOC104422176	laccase-1
Eucgr.B04004	29.2037	32.5835	35.1998	24.1735	19.83	9.96684	24.2618	20.1119	22.2296	21.1838	22.8497	22.2906	LOC104434120	N-alpha-acetyltransferase 25, NatB auxiliary subunit
Eucgr.F02222	0	0	0	0	0.067582	0	0	0	0	0	0	0
Eucgr.E00219	0	0.150855	0.168111	0	0	0	0	0	0	0.320117	0	0.358904	LOC104445927	uncharacterized LOC104445927
Eucgr.E01434	3.38416	6.24252	5.16437	5.19861	4.15457	8.65485	3.39787	4.3873	4.26044	6.84107	5.8437	5.79249	LOC104446290	vestitone reductase
Eucgr.G00568	1.67983	2.35739	2.29395	1.56205	1.27553	1.11683	2.28523	1.76171	1.80796	1.58392	1.92645	2.1713	LOC104452695	putative transferase At1g60990, chloroplastic
Eucgr.J01955	42.7898	40.9669	44.2035	23.7398	23.9686	21.2918	53.9503	52.6775	55.1826	25.2188	27.259	28.1471	LOC104422423	phosphatidylinositol:ceramide inositolphosphotransferase 1
Eucgr.G00346	0	0	0	0	0	0	0	0	0	0	0	0
Eucgr.D01540	1.58932	3.39439	2.91778	0.634861	1.52288	1.40884	2.63164	2.10821	2.0614	2.18819	2.11711	3.31936	LOC104443025	palmitoyl-protein thioesterase 1
Eucgr.B03259	0.202678	0	0	0	0	0	0	0	0	0	0	0
Eucgr.K01287	2.04656	2.74004	2.49832	1.34503	0.755774	1.06166	4.95164	5.21606	4.70638	1.56088	2.13169	2.23283	LOC104425113	vacuolar-sorting receptor 1
Eucgr.G02383	1.07806	0.51622	1.01533	0.04615	0.153965	0	0.197982	0.134349	0.564051	0	0.117726	0	LOC104455719	putative F-box protein At3g52320
Eucgr.B03094	0	0	0	0	0	0	0	0	0	0	0	0
Eucgr.H03155	0	0	0.235064	0.449743	1.60933	0	0.620894	20.3487	2.21254	0.384416	0.082337	0.454915	LOC104414569	protein WVD2-like 3
Eucgr.F01080	65.6748	58.4059	51.4078	1.29255	2.07362	1.46189	81.2239	116.756	112.125	0.713726	0.907596	0.361171	LOC104448402	uncharacterized LOC104448402
Eucgr.J02006	6.14942	7.86971	5.16035	0.665632	1.63366	1.637	3.49935	4.26613	5.88358	2.2506	2.84984	2.37863	LOC104422464	tropinone reductase homolog At1g07440
Eucgr.H02703	0	0	0	0	0	0	0	0	0	0	0	0	LOC104417079	UDP-glycosyltransferase 83A1
Eucgr.B02717	0	0.059836	0	0	0.071926	0	0	0	0	0	0.054813	0
Eucgr.C02472	3.13264	3.26174	2.36761	6.64493	5.40831	4.84457	3.9901	2.66384	4.26028	6.27589	8.95259	8.0921	LOC104437477	dirigent protein 22
Eucgr.I02058	0.079076	0	0	0	0	0	0	0	0	0	0.068379	0	LOC104419443	developmental protein SEPALLATA 1
Eucgr.K00134	14.9295	12.6798	17.7157	13.0905	12.2634	9.25229	8.07801	6.83721	6.55034	18.8604	18.0141	17.61	LOC104424319	uncharacterized Rho GTPase-activating protein At5g61530
Eucgr.I01623	26.2558	37.7633	26.9587	13.0915	18.4324	16.3423	53.1108	42.301	53.2273	7.95149	9.52542	9.09554	LOC104419119	uncharacterized LOC104419119
Eucgr.H00911	0.285685	1.18216	1.0238	0	0.449081	0.490125	1.89816	1.79971	1.78082	0.236211	0.248745	0
Eucgr.C01188	0	0	0	0	0	0	0	0	0	0	0	0
Eucgr.K01051	28.5103	20.754	27.6533	21.521	20.7771	21.6446	36.1004	33.5947	32.8526	14.5421	14.3811	13.5556	LOC104424941	cytochrome b561, DM13 and DOMON domain-containing protein At5g54830
Eucgr.G00250	2.45071	2.15734	2.54172	2.52877	3.34811	2.3699	24.0514	23.6078	18.8718	44.1258	48.6564	46.3342	LOC104454821	probable disease resistance protein At4g27220
Eucgr.G01645	11.1589	11.8619	14.947	81.8534	54.1095	87.5306	6.75768	4.40983	3.71531	17.3215	20.0832	21.0435	LOC104453319	bZIP transcription factor 44-like
Eucgr.H02860	1.87239	2.71877	1.50306	13.3329	8.78015	1.78299	2.54431	6.45932	3.10788	7.98456	6.42363	6.41867	LOC104414384	probable pectate lyase 1
Eucgr.J01309	0.134428	0	0.197804	0	0.060185	0.342023	0	0	0	0	0	0.129323
Eucgr.B00492	1.0303	1.99675	1.89708	1.34244	1.26205	1.00002	3.11741	2.44168	2.81986	1.38163	1.123	1.76515	LOC104419687	putative pentatricopeptide repeat-containing protein At1g74580
Eucgr.G02060	0.162579	0.718981	0	1.21062	1.33894	2.26315	2.10473	0.911907	1.36618	1.07519	0.648642	0.747949
Eucgr.B02669	0.431716	0.683085	0.289108	0.689271	0.781026	0.994669	0.635977	0.58168	1.42212	0.49239	0.903298	0.944307	LOC104435421	uncharacterized LOC104435421
Eucgr.H00110	0.598214	0.58846	0.682735	3.36009	3.00161	3.2258	0.837596	1.02354	1.52354	1.70436	2.14607	2.61897	LOC104456066	glutathione transferase GST 23
Eucgr.E02598	0	0	0	0	0	0	0	0	0	0	0	0
Eucgr.C02375	0	0	0	0.377652	0	0.450745	0.196925	0.11251	0	0.483058	0.320241	0.57155	LOC104439645	vinorine synthase
Eucgr.D00117	0	0	0	0	0	0	0	0	0	0	0	0	LOC104442477	uncharacterized LOC104442477
Eucgr.I00212	0	0	0	0	0	0	0	0	0	0	0	0
Eucgr.D01058	0	0	0	0	0	0	0	0	0	0	0	0
Eucgr.F03896	0	0	0	0	0	0	0.073023	0	0	0.08745	0	0	LOC104452227	TMV resistance protein N
Eucgr.J03014	0.327931	0.052882	0.116683	6.90783	7.59108	5.12406	9.3722	1.62641	0.423561	8.53117	7.73773	9.66185	LOC104423132	F-box/kelch-repeat protein At1g80440
Eucgr.C00532	0	0	0	0	0	0	0.256501	0.257883	0	1.50659	1.17763	0.984269
Eucgr.K02553	0	0	0	0	0.09487	0	0	0	0	0	0	0	LOC108956019	eugenol synthase 1-like
Eucgr.D01319	0	0	0	0	0	0	0	0	0	0	0	0	LOC104442916	pyruvate decarboxylase 1
Eucgr.E03988	1.55244	1.63292	2.93521	0.507983	0.695597	1.53946	1.74008	1.2402	1.39029	0.70536	0.455988	0.456362	LOC108960120	hypothetical protein
Eucgr.J02380	0	0	0	0	0	0	0	0	0	0	0	0	LOC104422726	dehydrin Xero 1
Eucgr.I00327	0.172344	0.083284	0	0	0.190905	0	0.01886	0.238555	0	0.335255	0.464837	0.213328	LOC104420198	protein MIZU-KUSSEI 1
Eucgr.D01752	21.927	20.4645	21.3776	16.6537	11.5671	13.9395	32.6251	29.8081	32.6275	10.5395	12.9706	11.9122	LOC104441665	phosphatidylinositol 4-kinase gamma 4
Eucgr.J03080	30.2904	22.1875	27.7974	48.9535	48.0657	38.2718	34.5842	41.3307	43.509	56.6106	60.1516	57.4754	LOC104423193	glycerol kinase
Eucgr.B03203	0	0	0	0	0	0	0	0	0	0	0	0.082004	LOC104433434	phosphate transporter PHO1 homolog 10
Eucgr.K00504	0	0	0	0.068327	0	0	0	0	0	0	0	0
Eucgr.G02182	46.4656	48.4709	45.4263	18.7843	20.3792	18.6715	39.8152	35.6787	38.6294	23.0935	26.3742	26.804	LOC104453711	SEC12-like protein 2
Eucgr.B02216	2.92386	3.66758	1.56435	0	0	0	10.3178	11.5034	13.0085	0	0	0	LOC104432612	stress-response A/B barrel domain-containing protein HS1
Eucgr.I01049	0.921061	0.456128	0.720406	1.47964	2.2585	0.981131	1.73085	2.41443	2.59103	4.54276	3.66765	3.5633	LOC104418651	nucleobase-ascorbate transporter 4
Eucgr.K01308	68.3462	65.1472	53.8434	1120.07	1069	1022.08	494.167	450.972	471.783	1015.17	947.904	954.261	LOC104425137	calcium-binding protein CML42
Eucgr.J02521	2.31912	3.22584	3.00211	0.460125	1.01151	0.334573	2.73225	2.9807	3.98911	0.633282	0.853205	0.799079	LOC104422827	protein STRICTOSIDINE SYNTHASE-LIKE 5
Eucgr.L01584	0	0	0	0	0	0	0	0	0	0	0	0
Eucgr.B01933	0.097042	0.093164	0.11515	0.281175	0	0.35754	0.477635	0.391531	0	0.227628	0	0	LOC104432298	psbP domain-containing protein 7, chloroplastic
Eucgr.B00989	0	0	0	0.493006	0.706252	1.57959	0.118521	0	0	0	0.039672	0
Eucgr.H02548	28.0302	19.4338	15.1329	39.6577	33.9689	38.7742	15.8528	20.8573	15.1657	105.112	108.65	98.6181	LOC104417032	F-box/kelch-repeat protein At1g23390
Eucgr.J03100	4.19435	8.67944	5.31957	4.0961	2.88796	0.934719	8.92958	7.66286	7.26263	12.4872	14.7979	13.4303	LOC104423207	uncharacterized LOC104423207
Eucgr.G01902	0	0	0	0	0	0	0	0	0	0	0	0
Eucgr.J00996	0	0	0	0	0	0	0	0	0	0	0	0
Eucgr.A01765	0.626797	0.267933	0.577302	0.919939	1.09859	0.907846	0.553963	0.564179	0.323685	0.55632	0.617076	0.462031	LOC104440186	G-type lectin S-receptor-like serine/threonine-protein kinase At2g19130
Eucgr.D02211	8.71685	13.0445	9.11802	1.1983	1.03235	1.07319	8.42012	9.0384	7.7296	0.968705	0.728664	1.3817	LOC104442031	keratin, type I cytoskeletal 10
Eucgr.C00249	4.48484	4.34768	3.7173	0.872494	1.10978	0.400861	6.92909	6.87436	3.95714	1.46251	1.27069	1.05639	LOC104436027	uncharacterized LOC104436027
Eucgr.H01945	9.1494	6.8681	8.25418	14.4958	16.1188	16.0281	9.39568	5.23705	5.97109	4.19017	4.32595	4.18246	LOC104457236	uncharacterized LOC104457236
Eucgr.K03548	0.604492	0.812957	0.272244	0.409227	0	0	0.186147	0.212905	0.07098	0.218244	0.44709	0.202721	LOC104426824	uncharacterized LOC104426824
Eucgr.G00906	0.353426	0	0.152575	0	0	0	0.035707	0.178179	0.034847	0.135116	0.377732	0.137889	LOC104455132	acetyl-CoA-benzylalcohol acetyltransferase
Eucgr.H04044	2.54436	1.86796	1.99733	0	0	0	0	0	0	0.231398	0	0	LOC104415233	dirigent protein 11
Eucgr.F02535	35.8627	46.8866	45.1238	15.6044	17.8968	11.3051	31.8738	22.5902	24.4272	18.5927	22.8624	23.3008	LOC104449456	signal peptidase complex catalytic subunit SEC11A
Eucgr.L00942	0	0	0	0.049603	0.084821	0.104495	0.939931	1.37683	1.04163	0.294063	0.567249	0.888963
Eucgr.F00606	0	0	0	0	0.169111	0	0	0	0	0	0	0	LOC108960274	receptor-like protein 12
Eucgr.H04094	0.046762	0.117036	0.083711	5.59378	6.37846	2.22716	0.71966	0.849243	0.543603	7.82846	7.67191	6.97761	LOC104415275	probable boron transporter 2
Eucgr.G00575	1.69846	2.35994	1.80534	6.17978	5.55546	2.14737	1.54741	1.692	2.03426	10.1086	12.0356	10.7705	LOC104452702	kinetochore protein nuf2
Eucgr.K01307	0	0	0	0.246361	0.328273	0	0	0	0	0	0	0
Eucgr.D00244	0	0	0	0	0	0	0	0	0	0	0	0
Eucgr.C03292	29.4873	43.7417	38.4371	10.6333	12.8253	12.465	40.4346	44.1866	39.7843	5.51125	5.33649	6.02849	LOC104438008	DEAD-box ATP-dependent RNA helicase 17
Eucgr.E02931	0.228008	0.532062	0.373441	0	0	0	0	0	0	0	0	0
Eucgr.J01469	8.71222	16.6328	12.5381	13.9195	15.31	17.2763	18.0749	12.2089	14.0094	5.81482	5.39517	6.02331	LOC104422086	uncharacterized LOC104422086
Eucgr.A02481	0.216373	2.03969	0	0.495599	0.269594	0.231021	0.23241	0	0	0	0	0	LOC104446169	dirigent protein 19
Eucgr.B00183	0	0	0	0	0.210129	0.018941	0	0	0	0.250056	0.183527	0.376473
Eucgr.H02187	0.998542	0.693971	1.09913	2.04637	2.48618	1.02117	0.298955	0.187312	0.196059	0.424427	0.463367	0.390409	LOC104457347	TMV resistance protein N
Eucgr.H01878	0	0	0	0	0	0	0	0	0	0	0	0	LOC104457204	2-alkenal reductase (NADP(+)-dependent)
Eucgr.C03748	0	0	0	0.104163	0.060498	0	0	0	0	0.366658	0.579359	0
Eucgr.J02193	0	0	0	0	0	0	0	0	0	0	0	0	LOC104423896	receptor homology region, transmembrane domain- and RING domain-containing protein 1-like
Eucgr.G03094	38.765	44.5749	48.0353	197.115	318.718	198.138	114.374	74.28	63.4958	591.074	584.247	574.007	LOC104454425	dehydration-responsive element-binding protein 2B
Eucgr.H04096	201.166	156.888	189.904	104.702	141.529	141.43	185.999	209.637	195.19	130.733	129.026	127.486	LOC104415277	uncharacterized LOC104415277
Eucgr.F04424	0	0.839547	0	0	0.289978	0	0	0	0.438205	0	0.317014	0.407344	LOC104450999	LOB domain-containing protein 4
Eucgr.K03012	11.0659	13.3677	13.1675	24.4255	29.3155	34.8701	56.3679	41.2992	43.7574	31.7655	32.7872	30.6912	LOC104426405	probable serine/threonine-protein kinase At5g41260
Eucgr.A01082	1193.78	1544.59	1105.27	707.848	784.553	1110.28	970.112	1052.43	1090.55	1067.67	1038.43	1066.72	LOC104434950	eukaryotic translation initiation factor 1A
Eucgr.L01988	0.976412	1.44955	1.80672	0.740488	0.461088	1.043	1.74516	1.63372	1.25648	1.14369	1.12624	1.09979	LOC104430188	pentatricopeptide repeat-containing protein At3g49710
Eucgr.H04749	5.60298	9.44283	8.83676	3.22106	1.3487	1.31086	1.48493	2.42276	0.854911	1.52708	1.08779	0.39334	LOC104415767	uncharacterized LOC104415767
Eucgr.L01040	17.7039	23.2724	22.0932	32.168	27.0269	11.7562	32.2807	29.2579	33.8543	41.7242	35.4858	39.73
[truncated: 34,351 more rows]
