# Supplementary material for: Transcriptome analysis identifies genes involved in the somatic embryogenesis of Eucalyptus
Source: BMC Genomics. 2020 Nov 18;21:803. doi: 10.1186/s12864-020-07214-5 (PMC7672952; doi:10.1186/s12864-020-07214-5)
Supplement: Supplementary file 3 — Additional file 3. Cell wall related DEGs identified in the SE of E. camaldulensis and E. grandis x urophylla. [file 12864_2020_7214_MOESM3_ESM.xlsx]

## Sheet: cell_wall.DEG
Additional file 3. Differentially expressed cell wall structural and regulatorary genes in the callus comapred to the stem of Eucalpytus.
GO_term	Total	GeneID	A1_1	A1_2	A1_3	A2_1	A2_2	A2_3	B1_1	B1_2	B1_3	B2_1	B2_2	B2_3	A2_vs_A1(logFC)	A2_vs_A1(FDR)	A2_vs_A1(Regulation)	B2_vs_B1(logFC)	B2_vs_B1(FDR)	B2_vs_B1(Regulation)	Gene_name	Description
GO:0005199~structural constituent of cell wall	4	Eucgr.F01000	97.4528	76.606	96.5246	190.665	212.329	235.693	130.255	121.051	108.408	108.836	104.454	109.527	1.64623	5.67e-05	UP	0.109523	0.823757	NC	LOC104448355	formin-like protein 5
GO:0005618~cell wall	299	Eucgr.H02634	1988.86	2158.28	2010.53	1176.53	1232.34	704.023	1338.04	1434.65	1195.63	2707.9	2663.95	2759.84	-0.598576	0.163667	NC	1.28393	0.0019471	UP	LOC104414247	xyloglucan endotransglucosylase/hydrolase 2
GO:0005618~cell wall	299	Eucgr.A00084	205.811	302.203	238.719	67.8394	58.0744	42.6697	173.339	153.867	176.579	120.78	128.709	122.959	-1.80328	1.09e-05	DOWN	-0.197177	0.679851	NC	LOC104433838	40S ribosomal protein S15a-1
GO:0005618~cell wall	299	Eucgr.B03214	2.84772	12.1052	3.09872	0.605225	0.445089	0.421576	2.72433	4.24193	2.73798	4.97875	4.45875	5.1107	-3.30708	3.54e-11	DOWN	0.916996	0.042127	NC	LOC104433444	expansin-A1
GO:0005618~cell wall	299	Eucgr.F02908	29.3835	26.1092	25.2511	12.5037	10.5174	6.9141	14.7978	15.5434	13.7165	12.8608	10.5593	10.2488	-1.10263	0.00855934	DOWN	-0.0813122	0.874858	NC	LOC104449761	expansin-A13
GO:0005618~cell wall	299	Eucgr.F01855	3.31747	5.30667	3.18094	12.1761	10.5625	5.65502	7.36461	11.701	7.72992	14.801	14.5604	14.9147	1.66579	6.83e-05	UP	0.982619	0.020662	NC	LOC104448982	beta-galactosidase 5
GO:0005618~cell wall	299	Eucgr.D00476	0.05763	0	0.415989	14.018	11.6169	1.95213	1.57195	20.9939	4.10256	3.82364	4.58231	3.89361	6.16301	1.88e-31	UP	-0.928793	0.0301844	NC	LOC104440888	cellulose synthase A catalytic subunit 8 [UDP-forming]
GO:0005618~cell wall	299	Eucgr.G03134	3.5396	2.522	2.0362	41.8186	24.7477	22.9865	10.4593	11.4648	10.5005	15.3013	16.591	15.4164	4.19478	5.54e-20	UP	0.867276	0.046249	NC	LOC104454460	expansin-A8-like
GO:0005618~cell wall	299	Eucgr.F02049	1.06722	2.33333	2.18718	11.4877	7.54737	5.1347	1.2272	2.31634	1.01564	2.5505	2.71359	1.61566	2.56721	9.55e-09	UP	0.84323	0.0926003	NC	LOC104449125	fasciclin-like arabinogalactan protein 1
GO:0005618~cell wall	299	Eucgr.F01000	97.4528	76.606	96.5246	190.665	212.329	235.693	130.255	121.051	108.408	108.836	104.454	109.527	1.64623	5.67e-05	UP	0.109523	0.823757	NC	LOC104448355	formin-like protein 5
GO:0005618~cell wall	299	Eucgr.D02537	35.4706	29.8968	36.4849	16.6512	16.57	5.52488	43.8585	55.5857	44.6177	19.1496	19.7518	20.6675	-1.08526	0.00948937	DOWN	-1.04769	0.0128931	DOWN	LOC104442305	actin-7
GO:0005618~cell wall	299	Eucgr.B03378	0	0	0	2.79349	2.58438	0.220257	0.634585	1.21087	1.27117	2.08907	1.55002	1.2746	7.79046	8.09e-13	UP	0.977494	0.0653867	NC	LOC104433571	germin-like protein subfamily 1 member 1
GO:0005618~cell wall	299	Eucgr.F01650	0.57637	0	0.351809	3.7293	3.17092	3.04841	0.472448	0	0	2.03029	2.06483	1.95494	3.36563	5.02e-07	UP	0	1	NC	LOC104448839	gibberellin-regulated protein 1
GO:0005618~cell wall	299	Eucgr.D02537	35.4706	29.8968	36.4849	16.6512	16.57	5.52488	43.8585	55.5857	44.6177	19.1496	19.7518	20.6675	-1.08526	0.00948937	DOWN	-1.04769	0.0128931	DOWN	LOC104442305	actin-7
GO:0005618~cell wall	299	Eucgr.F02423	108.006	138.826	139.571	36.5404	49.5241	53.6057	243.369	208.388	261.049	100.284	98.8949	97.765	-1.06781	0.0103013	DOWN	-1.02811	0.0142832	DOWN	LOC104449373	annexin D1
GO:0005618~cell wall	299	Eucgr.I01236	36.6715	19.3391	58.723	433.302	410.984	299.519	308.268	104.208	129.648	292.683	276.086	281.022	3.73913	4.75e-18	UP	0.735637	0.0863578	NC	LOC104418805	hemoglobin-2
GO:0005618~cell wall	299	Eucgr.F02423	108.006	138.826	139.571	36.5404	49.5241	53.6057	243.369	208.388	261.049	100.284	98.8949	97.765	-1.06781	0.0103013	DOWN	-1.02811	0.0142832	DOWN	LOC104449373	annexin D1
GO:0005618~cell wall	299	Eucgr.J01176	97.1985	121.634	80.2622	10.4331	6.40104	4.53908	33.7099	46.1817	40.8448	7.57982	7.34182	8.53562	-3.6235	7.12e-17	DOWN	-2.16797	2.15e-07	DOWN	LOC104421863	aspartyl protease AED3
GO:0005618~cell wall	299	Eucgr.H01344	30.7923	17.443	22.4086	45.5059	49.7626	36.5987	29.5159	45.2701	34.7354	47.5394	44.7944	48.7912	1.32104	0.00144242	UP	0.642835	0.13987	NC	LOC104456908	nectarin-1
GO:0005618~cell wall	299	Eucgr.G01174	0.28841	0.735411	0.697487	5.34669	3.43206	1.91291	0.677263	1.45414	1.00872	1.64601	1.1544	1.9359	3.36932	1.95e-10	UP	0.931489	0.0851827	NC	LOC104453046	probable xyloglucan endotransglucosylase/hydrolase protein 10
GO:0005618~cell wall	299	Eucgr.A01377	0.994261	0.886076	1.30857	2.44244	2.42507	2.35269	5.7113	6.13942	3.02791	0.22945	0.068782	0.261435	1.72928	0.000312621	UP	-4.95921	3.18e-19	DOWN	LOC104437150	subtilisin-like protease SBT5.3
GO:0005618~cell wall	299	Eucgr.B00589	165.317	182.678	181.813	324.127	319.583	277.421	150.88	160.382	164.386	352.386	356.526	357.383	1.2113	0.00328604	UP	1.42822	0.00054933	UP	LOC104420525	ATP synthase subunit gamma, mitochondrial
GO:0005618~cell wall	299	Eucgr.G00032	0	0	0	2.84086	2.66704	0.418566	0	2.24255	0.373682	2.24711	2.17608	1.89898	5.98123	3.52e-12	UP	0	1	NC
GO:0005618~cell wall	299	Eucgr.G01704	0.314446	1.7913	1.1444	11.1377	10.4651	6.19525	1.20665	1.75005	0.9563	11.3459	11.3396	12.1107	3.48476	3.67e-15	UP	3.57354	8.02e-16	UP	LOC104453358	beta-galactosidase 5
GO:0005618~cell wall	299	Eucgr.G01704	0.314446	1.7913	1.1444	11.1377	10.4651	6.19525	1.20665	1.75005	0.9563	11.3459	11.3396	12.1107	3.48476	3.67e-15	UP	3.57354	8.02e-16	UP	LOC104453358	beta-galactosidase 5
GO:0005618~cell wall	299	Eucgr.H05090	0	0	0.055667	1.37845	1.11427	0.237026	0	0.501014	0.101543	0.839119	1.12555	1.00424	5.75511	5.31e-14	UP	3.10386	3.68e-08	UP	LOC104415986	beta-galactosidase 6
GO:0005618~cell wall	299	Eucgr.A01044	209.522	231.61	229.843	40.9756	50.6403	41.9789	130.769	129.335	123.208	100.653	101.557	96.3302	-1.96702	1.58e-06	DOWN	-0.118919	0.808201	NC	LOC104434674	heat shock protein 90-6, mitochondrial
GO:0005618~cell wall	299	Eucgr.A01044	209.522	231.61	229.843	40.9756	50.6403	41.9789	130.769	129.335	123.208	100.653	101.557	96.3302	-1.96702	1.58e-06	DOWN	-0.118919	0.808201	NC	LOC104434674	heat shock protein 90-6, mitochondrial
GO:0005618~cell wall	299	Eucgr.I02156	98.6806	57.8113	74.4249	90.4844	67.7484	51.7831	40.3455	37.8614	29.8516	14.5453	15.3965	15.4473	0.21744	0.642045	NC	-1.08561	0.00969346	DOWN	LOC104419523	subtilisin-like protease SBT1.5
GO:0005618~cell wall	299	Eucgr.J00936	46.1751	45.9698	42.4721	10.5765	10.2352	5.38312	21.0643	15.7438	24.5808	6.34969	7.12334	6.73072	-2.03703	7.54e-07	DOWN	-1.37421	0.000981844	DOWN	LOC104421672	beta-galactosidase 8
GO:0005618~cell wall	299	Eucgr.D00703	83.4335	89.4254	75.2017	0.047981	0.016838	0	60.5693	46.4961	52.5743	0.038792	0	0.039191	-10.4312	3.38e-59	DOWN	-9.98948	3.38e-56	DOWN	LOC104441065	beta-galactosidase 8
GO:0005618~cell wall	299	Eucgr.D00703	83.4335	89.4254	75.2017	0.047981	0.016838	0	60.5693	46.4961	52.5743	0.038792	0	0.039191	-10.4312	3.38e-59	DOWN	-9.98948	3.38e-56	DOWN	LOC104441065	beta-galactosidase 8
GO:0005618~cell wall	299	Eucgr.I02676	30.156	32.2547	32.2503	34.8045	32.1959	20.1236	18.3132	19.4546	19.012	43.2304	41.2006	42.5541	0.206766	0.664152	NC	1.44224	0.000540361	UP	LOC104419917	3-hydroxyacyl-[acyl-carrier-protein] dehydratase FabZ
GO:0005618~cell wall	299	Eucgr.I01067	0.175097	0.048212	0	0.234408	0.938787	0.625101	0.40744	0.193305	0.56604	1.70459	1.95186	2.56804	3.28929	1.97e-07	NC	3.07831	2.18e-10	UP	LOC104420484	probable beta-D-xylosidase 5
GO:0005618~cell wall	299	Eucgr.F01209	44.7658	59.2839	54.6887	27.8389	22.1951	12.4105	34.0889	27.7343	33.1315	52.8054	55.3737	53.8513	-1.00292	0.0166461	DOWN	1.01042	0.0165658	UP	LOC104448518	malate dehydrogenase, mitochondrial
GO:0005618~cell wall	299	Eucgr.B03603	206.05	209.237	211.494	39.8541	32.6956	26.8056	137.355	151.348	156.216	88.6698	97.7045	98.6622	-2.29912	2.5e-08	DOWN	-0.408479	0.361974	NC	LOC104433771	mitochondrial dicarboxylate/tricarboxylate transporter DTC
GO:0005618~cell wall	299	Eucgr.A01968	686.544	749.591	621.261	225.715	242.881	237.803	822.521	857.162	832.018	433.593	436.371	437.043	-1.16887	0.00461635	DOWN	-0.714512	0.0958144	NC	LOC104441748	probable xyloglucan endotransglucosylase/hydrolase protein 16
GO:0005618~cell wall	299	Eucgr.C00180	420.935	602.071	465.32	71.3431	108.639	114.801	469.253	584.557	579.91	536.711	513.447	538.688	-1.91909	2.84e-06	DOWN	0.24623	0.597432	NC	LOC104435967	probable xyloglucan endotransglucosylase/hydrolase protein 23
GO:0005618~cell wall	299	Eucgr.C00180	420.935	602.071	465.32	71.3431	108.639	114.801	469.253	584.557	579.91	536.711	513.447	538.688	-1.91909	2.84e-06	DOWN	0.24623	0.597432	NC	LOC104435967	probable xyloglucan endotransglucosylase/hydrolase protein 23
GO:0005618~cell wall	299	Eucgr.C00181	176.367	230.632	177.316	32.5309	41.4455	51.1221	217.278	234.61	224.877	158.735	162.932	162.021	-1.52731	0.000306903	DOWN	-0.731648	0.0912097	NC	LOC104435972	probable xyloglucan endotransglucosylase/hydrolase protein 23
GO:0005618~cell wall	299	Eucgr.B03348	14.8974	20.0886	13.6863	1.40293	1.54082	0.36886	1.51987	3.36637	4.93259	2.02265	2.05792	2.03728	-3.15347	2.61e-12	DOWN	-0.0283071	0.974435	NC	LOC104433548	probable xyloglucan endotransglucosylase/hydrolase protein 33
GO:0005618~cell wall	299	Eucgr.D01294	41.5511	59.7814	46.6147	11.0651	13.1669	8.51502	35.5954	30.7884	39.3349	39.0959	43.7187	41.7856	-1.8402	9.34e-06	DOWN	0.50016	0.260317	NC	LOC104441382	probable xyloglucan endotransglucosylase/hydrolase protein 8
GO:0005618~cell wall	299	Eucgr.J01663	14.1524	26.6154	28.4392	4.7361	9.13276	4.48278	66.1685	86.1488	67.5013	44.4846	46.9985	49.027	-1.63139	0.000104818	DOWN	-0.40709	0.365259	NC	LOC104422221	probable xyloglucan endotransglucosylase/hydrolase protein B
GO:0005618~cell wall	299	Eucgr.J02574	51.4137	64.1025	49.434	19.2341	14.5353	6.74111	16.0028	15.9115	12.48	9.3641	10.2991	8.95759	-1.72813	2.54e-05	DOWN	-0.372269	0.414095	NC	LOC104422873	subtilisin-like protease SBT3.9
GO:0005618~cell wall	299	Eucgr.J02574	51.4137	64.1025	49.434	19.2341	14.5353	6.74111	16.0028	15.9115	12.48	9.3641	10.2991	8.95759	-1.72813	2.54e-05	DOWN	-0.372269	0.414095	NC	LOC104422873	subtilisin-like protease SBT3.9
GO:0005618~cell wall	299	Eucgr.J00584	25.8737	21.0534	21.6776	24.2222	21.4239	16.2094	19.1172	18.5542	16.4499	29.689	28.1505	29.7228	0.185572	0.699803	NC	1.00916	0.0170387	UP	LOC104421366	putative phosphatidylglycerol/phosphatidylinositol transfer protein DDB_G0282179
GO:0005618~cell wall	299	Eucgr.J02574	51.4137	64.1025	49.434	19.2341	14.5353	6.74111	16.0028	15.9115	12.48	9.3641	10.2991	8.95759	-1.72813	2.54e-05	DOWN	-0.372269	0.414095	NC	LOC104422873	subtilisin-like protease SBT3.9
GO:0005618~cell wall	299	Eucgr.J00383	10.998	15.2429	15.6397	7.3205	4.47771	4.92321	3.21554	2.83765	2.4513	8.38839	8.271	7.80459	-1.04139	0.016424	DOWN	1.81128	3.46e-05	UP	LOC104421223	xyloglucan endotransglucosylase/hydrolase protein 31
GO:0005618~cell wall	299	Eucgr.B03937	0.86649	2.04982	1.47938	0.284751	0.114096	0	0.52408	0.862923	0.479621	0	0	0.120514	-3.02439	4.22e-06	DOWN	0	1	NC	LOC104434058	xyloglucan endotransglucosylase/hydrolase protein 31
GO:0005618~cell wall	299	Eucgr.A00020	878.461	493.348	834.395	249.873	177.138	165.96	741.997	732.801	720.651	113.645	120.453	119.761	-1.54188	0.000164763	DOWN	-2.41205	6.05e-09	DOWN	LOC104443583	endochitinase EP3
GO:0005618~cell wall	299	Eucgr.H00619	1.226	1.26535	2.15197	0.281708	0	0.117737	0	1.02974	0.941673	1.00712	1.00772	0.695876	-2.30609	0.000259868	DOWN	0	1	NC	LOC104456417	xyloglucan endotransglucosylase/hydrolase protein 9
GO:0005618~cell wall	299	Eucgr.H00619	1.226	1.26535	2.15197	0.281708	0	0.117737	0	1.02974	0.941673	1.00712	1.00772	0.695876	-2.30609	0.000259868	DOWN	0	1	NC	LOC104456417	xyloglucan endotransglucosylase/hydrolase protein 9
GO:0005618~cell wall	299	Eucgr.E01228	0.874985	6.61818	1.95793	0.707508	0.848192	0	0	1.70969	2.10596	0.225566	0.211871	0	-1.29568	0.0560469	DOWN	0	1	NC
GO:0005618~cell wall	299	Eucgr.F02429	31.1005	39.2241	37.7958	10.3823	11.6727	14.4341	36.0291	24.6146	36.7715	14.4455	12.6527	14.1086	-1.18608	0.00474298	DOWN	-0.898294	0.0360721	NC
GO:0005618~cell wall	299	Eucgr.C00395	43.5296	11.6942	38.1067	269.56	434.37	867.661	193.437	222.992	215.999	450.073	445.395	462.373	4.53651	3.14e-24	UP	1.36858	0.000938757	UP	LOC104436118	chitotriosidase-1
GO:0005618~cell wall	299	Eucgr.J00120	4.3661	5.19176	5.38876	0.1244	0	0.129286	5.60718	12.828	4.10162	0.6478	0	0.304473	-5.20972	1.59e-15	DOWN	-4.68084	4.61e-18	DOWN	LOC104420990	expansin-A8
GO:0005618~cell wall	299	Eucgr.F03589	0.887527	0.921122	3.01272	76.7758	62.4179	16.8791	7.41604	27.5903	16.3707	63.5552	61.951	62.5274	5.63226	3.83e-31	UP	2.13417	2.68e-07	UP	LOC104450337	cysteine protease XCP2
GO:0005618~cell wall	299	Eucgr.F03589	0.887527	0.921122	3.01272	76.7758	62.4179	16.8791	7.41604	27.5903	16.3707	63.5552	61.951	62.5274	5.63226	3.83e-31	UP	2.13417	2.68e-07	UP	LOC104450337	cysteine protease XCP2
GO:0005618~cell wall	299	Eucgr.K02050	3.09889	1.74535	1.79723	1.6157	1.0291	0	2.82067	6.21908	3.71515	1.59459	2.97515	1.17733	-0.913727	0.0978499	NC	-1.02667	0.0300244	DOWN	LOC104425649	germin-like protein subfamily 3 member 2
GO:0005618~cell wall	299	Eucgr.G02490	1.26863	1.49583	0.908045	10.4271	8.10439	3.06429	0.968992	1.73186	1.27872	15.1274	14.5442	14.074	3.1156	2.81e-11	UP	4.11129	1.67e-18	UP	LOC104453939	expansin-A1
GO:0005618~cell wall	299	Eucgr.G02490	1.26863	1.49583	0.908045	10.4271	8.10439	3.06429	0.968992	1.73186	1.27872	15.1274	14.5442	14.074	3.1156	2.81e-11	UP	4.11129	1.67e-18	UP	LOC104453939	expansin-A1
GO:0005618~cell wall	299	Eucgr.H05003	0	0.457023	0.113475	1.73141	1.71609	0.357987	0.316908	0.191519	0.206301	4.0488	3.68578	3.49903	3.74566	9.74e-08	UP	4.74072	4.39e-16	UP	LOC104415923	expansin-A20
GO:0005618~cell wall	299	Eucgr.C00760	6.84772	3.34477	3.79325	0	0	0	1.53637	2.01656	1.53692	0	0	0.045633	-7.42288	1.21e-21	DOWN	-6.39563	3.04e-15	DOWN	LOC104436378	pectinesterase
GO:0005618~cell wall	299	Eucgr.J02048	2.12109	0.990495	1.46869	108.274	100.819	86.3283	0.1463	0.309683	0	5.82407	4.64888	3.83231	6.67753	2.48e-39	UP	5.53024	3.87e-20	UP	LOC104422490	expansin-A4
GO:0005618~cell wall	299	Eucgr.B02355	9.50053	17.5561	11.7434	112.884	110.203	57.6884	5.84013	6.67397	4.876	189.304	197.617	187.196	3.38288	2.84e-15	UP	5.57408	5.2e-32	UP	LOC104432728	expansin-A4
GO:0005618~cell wall	299	Eucgr.B02310	1.07399	0.111303	0.164456	0	0	0	2.13712	1.6687	0.597474	0.07294	0	0.073942	0	1	NC	-5.21146	5.22e-12	DOWN	LOC104432694	ribulose bisphosphate carboxylase/oxygenase activase, chloroplastic
GO:0005618~cell wall	299	Eucgr.G02938	1.84254	2.28367	3.02671	24.6392	13.0468	7.48004	4.88491	6.17572	5.51045	11.831	11.3005	11.4121	3.18482	5.59e-13	UP	1.38193	0.0011971	UP	LOC104454301	expansin-A4
GO:0005618~cell wall	299	Eucgr.B02660	113.944	61.3673	98.8871	121.593	136.867	126.131	68.5875	75.4429	65.9917	199.714	209.331	206.561	0.880119	0.0357676	NC	1.81971	1.01e-05	UP	LOC104433015	probable xyloglucan endotransglucosylase/hydrolase protein 28
GO:0005618~cell wall	299	Eucgr.B03013	0	0	0.6492	0.791265	1.20374	0.826019	2.78824	2.60006	1.90833	0	0.095636	0.255383	0	1	NC	-4.47976	4.83e-10	DOWN	LOC104433278	ribulose bisphosphate carboxylase small chain 3B, chloroplastic
GO:0005618~cell wall	299	Eucgr.B00015	42.757	49.9119	54.3393	15.0645	19.7184	21.6277	26.1377	18.1022	26.63	9.01671	9.38606	7.82638	-0.898607	0.0342558	NC	-1.14074	0.00743101	DOWN	LOC104434192	annexin D7
GO:0005618~cell wall	299	Eucgr.H00909	9.90962	14.228	11.1176	0	0	0	9.98474	12.0802	12.4424	0.067248	0.061415	0.178717	-10.5028	8.51e-30	DOWN	-6.91381	3.93e-29	DOWN	LOC104456622	probable pectinesterase 53
GO:0005618~cell wall	299	Eucgr.H00909	9.90962	14.228	11.1176	0	0	0	9.98474	12.0802	12.4424	0.067248	0.061415	0.178717	-10.5028	8.51e-30	DOWN	-6.91381	3.93e-29	DOWN	LOC104456622	probable pectinesterase 53
GO:0005618~cell wall	299	Eucgr.A00990	0.35494	0.17114	1.31323	26.5009	19.059	5.96748	1.97666	9.72009	4.70046	10.8161	12.8151	12.972	5.75454	2.47e-26	UP	1.53028	0.000388737	UP	LOC104434206	germin-like protein subfamily 2 member 4
GO:0005618~cell wall	299	Eucgr.C00178	221.655	304.855	220.775	100.063	116.039	130.696	161.661	157.754	174.373	218.875	235.586	214.402	-0.210074	0.654817	NC	1.15427	0.00567213	UP	LOC104435971	probable xyloglucan endotransglucosylase/hydrolase protein 23
GO:0005618~cell wall	299	Eucgr.I00763	3.61597	5.06897	4.146	8.71201	8.6497	5.37893	0.403774	0.337748	0.55695	5.88033	4.10645	5.57436	1.00312	0.0216137	UP	3.91306	2.84e-14	UP	LOC104418487	microtubule-associated protein RP/EB family member 1C
GO:0005618~cell wall	299	Eucgr.I00789	1.61094	2.85288	2.53069	16.2667	16.5174	7.51059	1.14817	1.66788	1.53595	18.9831	18.9526	19.7322	2.88206	4.8e-11	UP	4.05092	1.34e-18	UP	LOC104418500	microtubule-associated protein RP/EB family member 1C
GO:0005618~cell wall	299	Eucgr.B01596	5174.78	3194.01	4346.58	264.161	254.561	492.794	3567.43	3570.47	3564.66	407.022	388.336	401.616	-3.25902	1.38e-14	DOWN	-2.92683	3.28e-12	DOWN	LOC104428524	probable xyloglucan endotransglucosylase/hydrolase protein 23
GO:0005618~cell wall	299	Eucgr.C00898	1.133	2.98174	2.00771	2.65212	3.95907	0.786232	5.57583	5.04385	5.46741	2.01983	2.03017	2.66869	0.648423	0.158515	NC	-1.12746	0.00901499	DOWN	LOC104436488	beta-galactosidase
GO:0005618~cell wall	299	Eucgr.C00898	1.133	2.98174	2.00771	2.65212	3.95907	0.786232	5.57583	5.04385	5.46741	2.01983	2.03017	2.66869	0.648423	0.158515	NC	-1.12746	0.00901499	DOWN	LOC104436488	beta-galactosidase
GO:0005618~cell wall	299	Eucgr.E01463	0.107682	0	0.342406	18.4931	19.8587	76.648	1.3641	1.20911	2.09742	23.1272	24.207	24.5594	8.83024	1.67e-49	UP	4.35631	2.22e-21	UP	LOC104444380	pectinesterase 2
GO:0005618~cell wall	299	Eucgr.A01661	6.96916	11.5421	8.91215	1.8729	1.2216	1.02073	7.9224	14.2251	7.58621	2.99367	2.46312	2.62518	-2.56523	8.63e-09	DOWN	-1.6905	8.45e-05	DOWN	LOC104439389	probable xyloglucan endotransglucosylase/hydrolase protein 32
GO:0005618~cell wall	299	Eucgr.C02203	1.40524	1.2259	1.47024	0	0.188054	0	2.80651	2.8578	8.02682	1.28492	0.959875	0.608052	0	1	NC	-2.31614	3.17e-06	DOWN	LOC104437322	probable xyloglucan endotransglucosylase/hydrolase protein 23
GO:0005618~cell wall	299	Eucgr.I00659	71.0425	83.5782	93.0166	0	0	0	28.7559	37.0731	32.3649	0	0.22352	0.193521	-11.1902	2.58e-52	DOWN	-8.58526	4.21e-41	DOWN	LOC104418410	probable xyloglucan endotransglucosylase/hydrolase protein 6
GO:0005618~cell wall	299	Eucgr.C01265	28.8001	40.1292	30.4817	35.9954	31.8776	31.7375	19.7473	19.9934	21.7547	8.46886	8.34769	8.5266	0.382013	0.39505	NC	-1.05061	0.0130526	DOWN	LOC104439158	peroxisomal fatty acid beta-oxidation multifunctional protein AIM1
GO:0005618~cell wall	299	Eucgr.A01813	31.6897	64.5154	35.0473	39.6967	37.8329	39.664	26.2776	37.3712	39.2622	73.8553	72.0071	71.6723	0.269433	0.561669	NC	1.31947	0.00153571	UP	LOC104440663	thioredoxin-1
GO:0005618~cell wall	299	Eucgr.A02601	10.1064	8.39917	8.63025	140.997	126.703	85.4052	18.3646	15.7915	14.8455	56.2537	53.0223	50.2081	4.26092	9.43e-22	UP	2.07061	5.96e-07	UP	LOC104447095	probable aspartyl protease At4g16563
GO:0005618~cell wall	299	Eucgr.G02499	69.3492	91.0877	89.115	0.682328	1.64865	0.821309	7.13466	20.4393	14.0201	1.87539	3.06176	3.4918	-6.01315	5.94e-32	DOWN	-2.19825	7.29e-07	DOWN	LOC104453946	ribonuclease 1
GO:0005618~cell wall	299	Eucgr.J01234	68.1604	46.5998	44.1457	1.03677	3.50574	3.56787	83.1406	82.7016	70.2991	9.71175	11.3035	11.2366	-4.00444	2.6e-19	DOWN	-2.6737	1.74e-10	DOWN	LOC104421913	ribulose bisphosphate carboxylase/oxygenase activase, chloroplastic
GO:0005618~cell wall	299	Eucgr.J01234	68.1604	46.5998	44.1457	1.03677	3.50574	3.56787	83.1406	82.7016	70.2991	9.71175	11.3035	11.2366	-4.00444	2.6e-19	DOWN	-2.6737	1.74e-10	DOWN	LOC104421913	ribulose bisphosphate carboxylase/oxygenase activase, chloroplastic
GO:0005618~cell wall	299	Eucgr.J02030	86.8118	48.0151	43.7163	0.607806	0.921915	1.26978	77.6091	89.4957	75.3264	4.21173	4.42791	3.46127	-5.77366	1.24e-31	DOWN	-4.16467	8.92e-21	DOWN	LOC104422476	ribulose bisphosphate carboxylase/oxygenase activase, chloroplastic
GO:0005618~cell wall	299	Eucgr.J02030	86.8118	48.0151	43.7163	0.607806	0.921915	1.26978	77.6091	89.4957	75.3264	4.21173	4.42791	3.46127	-5.77366	1.24e-31	DOWN	-4.16467	8.92e-21	DOWN	LOC104422476	ribulose bisphosphate carboxylase/oxygenase activase, chloroplastic
GO:0005618~cell wall	299	Eucgr.E00425	0	0	0	5.31604	4.24509	2.78557	0.358707	0.277566	0.706937	13.425	12.9102	12.3998	9.36175	2.76e-23	UP	5.51135	6.58e-26	UP	LOC104443687	probable pectinesterase 68
GO:0005618~cell wall	299	Eucgr.J02030	86.8118	48.0151	43.7163	0.607806	0.921915	1.26978	77.6091	89.4957	75.3264	4.21173	4.42791	3.46127	-5.77366	1.24e-31	DOWN	-4.16467	8.92e-21	DOWN	LOC104422476	ribulose bisphosphate carboxylase/oxygenase activase, chloroplastic
GO:0005618~cell wall	299	Eucgr.J02030	86.8118	48.0151	43.7163	0.607806	0.921915	1.26978	77.6091	89.4957	75.3264	4.21173	4.42791	3.46127	-5.77366	1.24e-31	DOWN	-4.16467	8.92e-21	DOWN	LOC104422476	ribulose bisphosphate carboxylase/oxygenase activase, chloroplastic
GO:0005618~cell wall	299	Eucgr.J02030	86.8118	48.0151	43.7163	0.607806	0.921915	1.26978	77.6091	89.4957	75.3264	4.21173	4.42791	3.46127	-5.77366	1.24e-31	DOWN	-4.16467	8.92e-21	DOWN	LOC104422476	ribulose bisphosphate carboxylase/oxygenase activase, chloroplastic
GO:0005618~cell wall	299	Eucgr.J02030	86.8118	48.0151	43.7163	0.607806	0.921915	1.26978	77.6091	89.4957	75.3264	4.21173	4.42791	3.46127	-5.77366	1.24e-31	DOWN	-4.16467	8.92e-21	DOWN	LOC104422476	ribulose bisphosphate carboxylase/oxygenase activase, chloroplastic
GO:0005618~cell wall	299	Eucgr.H04905	0	0	0	2.60551	1.83703	0	0	0.33961	0.450712	1.11648	1.10098	1.82595	7.91203	1.62e-13	UP	3.14571	2.34e-07	UP	LOC104415856	probable pectinesterase 8
GO:0005618~cell wall	299	Eucgr.H04944	3.90923	4.50873	3.22758	10.7802	7.00629	6.58931	2.27601	2.42133	1.98472	9.39097	9.82533	11.4739	1.48714	0.000456509	UP	2.64706	9.96e-10	UP	LOC104415878	probable pectinesterase/pectinesterase inhibitor 51
GO:0005618~cell wall	299	Eucgr.C00175	1238.52	1403.61	1188.63	2100.56	2446.55	1956.66	1495.01	1645.01	1372.5	5466.24	5397.84	5482.81	1.15622	0.00507385	UP	2.10872	3.16e-07	UP	LOC104435963	probable xyloglucan endotransglucosylase/hydrolase protein 23
GO:0005618~cell wall	299	Eucgr.J02030	86.8118	48.0151	43.7163	0.607806	0.921915	1.26978	77.6091	89.4957	75.3264	4.21173	4.42791	3.46127	-5.77366	1.24e-31	DOWN	-4.16467	8.92e-21	DOWN	LOC104422476	ribulose bisphosphate carboxylase/oxygenase activase, chloroplastic
GO:0005618~cell wall	299	Eucgr.C00176	333.927	399.746	327.547	1160.89	1108.13	877.224	447.155	418.222	383.788	1130.86	1203.31	1143	1.93955	2.14e-06	UP	1.74131	2.35e-05	UP	LOC104435966	probable xyloglucan endotransglucosylase/hydrolase protein 23
GO:0005618~cell wall	299	Eucgr.C00182	16.0813	22.5012	17.1744	25.9565	32.6504	29.4648	41.0673	35.8028	46.0237	92.7342	89.9825	94.9808	1.44069	0.000510503	UP	1.42995	0.00055875	UP	LOC104435973	probable xyloglucan endotransglucosylase/hydrolase protein 23
GO:0005618~cell wall	299	Eucgr.C00184	24.9324	27.8444	25.3825	92.5989	124.77	98.6896	62.6658	45.1118	57.0428	415.799	412.753	416.546	2.46999	2.59e-09	UP	3.21373	3.75e-14	UP	LOC104435976	probable xyloglucan endotransglucosylase/hydrolase protein 23
GO:0005618~cell wall	299	Eucgr.F01001	79.7035	82.814	66.741	71.521	75.8462	65.6436	87.8896	81.6849	78.7049	145.845	135.067	144.318	0.23053	0.622056	NC	1.08314	0.00974684	UP	LOC104448356	probable histone H2A.1
GO:0005618~cell wall	299	Eucgr.G02075	6.9734	3.97647	4.82242	9.95196	9.55631	4.75002	3.04077	3.12772	2.16023	11.3967	10.3758	10.2396	1.09057	0.0116094	UP	2.38729	3.34e-08	UP	LOC104453636	probable xyloglucan endotransglucosylase/hydrolase protein 28
GO:0005618~cell wall	299	Eucgr.D02229	71.9981	69.3335	69.5883	295.166	322.131	313.776	113.611	113.758	103.065	212.396	212.579	215.92	2.63524	2.22e-10	UP	1.27034	0.0022124	UP	LOC104442050	probable xyloglucan endotransglucosylase/hydrolase protein 30
GO:0005618~cell wall	299	Eucgr.A02859	3.212	1.84661	2.40909	1.18962	1.42667	0.743262	6.60967	5.57295	4.72621	0.317146	0.068032	0.120301	-0.986505	0.0340553	NC	-5.27395	8.12e-23	DOWN	LOC104449401	subtilisin-like protease SBT1.3
GO:0005618~cell wall	299	Eucgr.A01380	9.32439	5.16287	12.8458	1.85427	2.2251	1.98436	4.56841	4.24636	2.88088	0.061184	0.150951	0.118609	-2.37649	4.64e-08	DOWN	-4.78773	1.95e-17	DOWN	LOC104437156	subtilisin-like protease SBT5.3
GO:0005618~cell wall	299	Eucgr.F03663	9.8252	7.14864	7.69514	1.21258	1.37594	0.526923	16.5792	17.6421	17.1269	0.565014	0.674674	1.06345	-3.04589	9.89e-12	DOWN	-4.48972	6.51e-22	DOWN	LOC104450396	subtilisin-like protease SBT5.4
GO:0005618~cell wall	299	Eucgr.F03689	56.4125	43.5675	42.3309	48.4126	40.4991	12.6638	39.7517	51.9759	47.1195	78.2983	77.3214	82.0267	-0.156224	0.746572	NC	1.07032	0.0107299	UP	LOC104450418	fasciclin-like arabinogalactan protein 1
GO:0005618~cell wall	299	Eucgr.G01420	0	0	0	0	0	0	5.66959	3.05482	2.65486	0.226145	0.218799	0.089412	0	1	NC	-4.45334	1.44e-15	DOWN	LOC104453190	subtilisin-like protease SBT1.7
GO:0005618~cell wall	299	Eucgr.G01685	0	0	0.433064	0.339956	0.769561	0.25217	1.42597	1.04718	0.485108	1.70531	1.7318	2.03231	0	1	NC	1.11429	0.0247021	UP	LOC104453340	putative pectinesterase 11
GO:0005618~cell wall	299	Eucgr.G02070	25.0206	25.9598	25.4694	38.8093	32.8605	24.5477	17.5679	18.969	17.9996	36.6666	35.5373	35.1981	0.695021	0.105442	NC	1.27622	0.00225513	UP	LOC104453630	pectinesterase 31
GO:0005618~cell wall	299	Eucgr.F00121	48.9144	26.0545	54.2572	144.662	129.969	117.613	18.5415	12.3634	6.96721	56.9003	57.7815	56.5219	2.02483	7.89e-07	UP	2.49538	2.09e-09	UP	LOC104447824	subtilisin-like protease SBT1.7
GO:0005618~cell wall	299	Eucgr.K01967	6.25917	7.30488	6.69098	27.9258	23.3721	10.5556	4.03455	3.88809	2.89226	7.38879	8.13922	8.95089	2.05596	7.06e-07	UP	1.40855	0.00089403	UP	LOC104425597	subtilisin-like protease SBT2.3
GO:0005618~cell wall	299	Eucgr.B00385	12.3672	10.9517	13.2808	19.4122	18.2165	14.6795	14.6208	11.1722	16.2207	20.9751	21.3203	23.89	3.51713	1.7e-15	UP	3.38512	1.01e-14	UP	LOC104418764	transcription factor bHLH79
GO:0005618~cell wall	299	Eucgr.B00385	12.3672	10.9517	13.2808	19.4122	18.2165	14.6795	14.6208	11.1722	16.2207	20.9751	21.3203	23.89	3.51713	1.7e-15	UP	3.38512	1.01e-14	UP	LOC104418764	transcription factor bHLH79
GO:0005618~cell wall	299	Eucgr.G03366	4.97953	6.60015	6.45941	19.7441	22.7933	8.38207	7.1704	14.2989	9.79538	133.841	140.01	141.303	1.88133	7.29e-06	UP	4.07177	2.97e-20	UP	LOC104454644	uncharacterized LOC104454644
GO:0005618~cell wall	299	Eucgr.A01966	50.6942	58.924	47.5871	386.734	323.115	414.034	61.5645	68.1807	86.5197	453.315	453.043	462.53	3.29176	8.63e-15	UP	2.95294	2.31e-12	UP	LOC104441732	xyloglucan endotransglucosylase/hydrolase 2
GO:0005618~cell wall	299	Eucgr.K00883	60.7116	95.491	48.9897	416.46	282.474	132.32	160.752	163.15	171.275	532.347	582.364	556.351	2.37816	8.22e-09	UP	1.97108	1.73e-06	UP	LOC104424824	xyloglucan endotransglucosylase/hydrolase protein 9
GO:0005618~cell wall	299	Eucgr.K00883	60.7116	95.491	48.9897	416.46	282.474	132.32	160.752	163.15	171.275	532.347	582.364	556.351	2.37816	8.22e-09	UP	1.97108	1.73e-06	UP	LOC104424824	xyloglucan endotransglucosylase/hydrolase protein 9
GO:0005618~cell wall	299	Eucgr.B01353	0.121701	0.366716	0.910224	0	0	0	5.00904	6.20493	3.9292	0	0	0	0	1	NC	-8.7889	1.39e-19	DOWN
GO:0005618~cell wall	299	Eucgr.B04032	189.576	183.571	185.996	276.968	271.839	273.408	171.607	170.934	163.015	336.588	331.817	325.91	0.954209	0.0221428	NC	1.23395	0.00296815	UP
GO:0005618~cell wall	299	Eucgr.B04032	189.576	183.571	185.996	276.968	271.839	273.408	171.607	170.934	163.015	336.588	331.817	325.91	0.954209	0.0221428	NC	1.23395	0.00296815	UP
GO:0005618~cell wall	299	Eucgr.B04032	189.576	183.571	185.996	276.968	271.839	273.408	171.607	170.934	163.015	336.588	331.817	325.91	0.954209	0.0221428	NC	1.23395	0.00296815	UP
GO:0005618~cell wall	299	Eucgr.C00177	346.973	439.934	365.489	631.098	639.716	529.337	549.939	537.651	515.894	865.853	815.162	919.316	1.46943	0.00033181	UP	1.39826	0.000716132	UP
GO:0005618~cell wall	299	Eucgr.C03721	0.429279	0.509415	1.2412	1.34665	0.336518	0.256419	0.101918	0.099623	0	1.88309	1.27949	1.40801	0	1	NC	4.73602	1.35e-10	UP
GO:0005618~cell wall	299	Eucgr.F02412	0	1.3557	1.04577	0.471226	0	0.339725	2.48118	3.20478	3.73607	1.71494	0.489797	1.42533	0	1	NC	-1.65265	0.00397361	DOWN
GO:0005618~cell wall	299	Eucgr.F02431	44.8021	55.7964	55.7393	7.04983	19.0057	17.7908	17.8413	12.7498	19.6039	3.9048	5.64293	4.99311	-1.24706	0.00274927	DOWN	-1.61514	0.00014508	DOWN
GO:0005618~cell wall	299	Eucgr.F02431	44.8021	55.7964	55.7393	7.04983	19.0057	17.7908	17.8413	12.7498	19.6039	3.9048	5.64293	4.99311	-1.24706	0.00274927	DOWN	-1.61514	0.00014508	DOWN
GO:0005618~cell wall	299	Eucgr.G00074	33.238	27.9387	34.5689	61.78	59.9051	45.7265	27.6843	24.9683	25.841	44.238	47.1777	45.6846	1.22072	0.00307167	UP	1.06353	0.0111703	UP
GO:0005618~cell wall	299	Eucgr.H02667	3.81777	3.09051	4.04932	2.374	1.84936	1.07295	2.45071	1.89702	1.50518	0.265279	0.175388	0.405006	-0.907585	0.0510918	NC	-3.01542	3.51e-08	DOWN
GO:0005618~cell wall	299	Eucgr.L03367	0.150451	0.218113	0.160421	0.343241	0	0	6.0194	10.3241	11.9634	0.784323	0.976792	0.723683	0	1	NC	-3.44807	2.07e-12	DOWN
GO:0009505~plant-type cell wall	174	Eucgr.G03128	69.6518	48.3361	64.1088	258.241	194.693	153.546	56.801	46.9488	47.5985	120.647	129.239	122.77	2.18461	1.06e-07	UP	1.57577	0.000134624	UP	LOC104454456	alpha-galactosidase 3
GO:0009505~plant-type cell wall	174	Eucgr.G03128	69.6518	48.3361	64.1088	258.241	194.693	153.546	56.801	46.9488	47.5985	120.647	129.239	122.77	2.18461	1.06e-07	UP	1.57577	0.000134624	UP	LOC104454456	alpha-galactosidase 3
GO:0009505~plant-type cell wall	174	Eucgr.F03054	316.157	194.477	277.197	90.0224	74.9578	42.4119	288.7	345.255	322.373	60.3644	69.5061	64.3725	-1.56112	0.00013858	DOWN	-2.06801	5.47e-07	DOWN	LOC104449900	aquaporin TIP2-1
GO:0009505~plant-type cell wall	174	Eucgr.F00411	19.3234	26.9839	20.9914	364.975	187.793	128.739	171.61	54.6245	49.6542	457.081	462.247	467.754	3.74224	4.57e-18	UP	2.62615	2.96e-10	UP	LOC104448020	aspartyl protease AED3
GO:0009505~plant-type cell wall	174	Eucgr.K02271	0.859478	3.95176	1.27796	114.635	77.4111	48.254	2.97739	4.95513	3.45993	58.5406	58.5939	62.4395	5.82634	8.2e-34	UP	4.30373	7.09e-22	UP	LOC104425836	auxin efflux carrier component 1
GO:0009505~plant-type cell wall	174	Eucgr.I00108	5.21834	4.14679	5.14362	237.448	306.572	440.296	15.353	8.29943	7.22494	578.78	566.804	582.094	6.64931	2.34e-41	UP	6.11894	4.44e-37	UP	LOC104418061	beta-galactosidase 10
GO:0009505~plant-type cell wall	174	Eucgr.I00065	4.9553	4.84598	5.20834	308.138	393.868	540.59	11.5131	5.97685	6.96359	492.524	493.457	490.84	6.95375	4.25e-43	UP	6.26204	1.35e-37	UP	LOC104420074	beta-galactosidase 3
GO:0009505~plant-type cell wall	174	Eucgr.J00326	52.3671	26.8891	44.1792	168.314	159.941	151.95	48.0406	37.9202	45.0771	35.5773	38.5625	35.9909	2.39951	6.32e-09	UP	0.0512169	0.920431	NC	LOC104421185	alpha-galactosidase 1
GO:0009505~plant-type cell wall	174	Eucgr.I01728	76.1618	86.922	95.8972	55.8921	45.1043	36.1918	67.2566	48.5636	62.6359	105.835	104.051	106.617	-0.383355	0.392848	NC	1.37827	0.000878685	UP	LOC104419209	GDSL esterase/lipase At5g14450
GO:0009505~plant-type cell wall	174	Eucgr.I01728	76.1618	86.922	95.8972	55.8921	45.1043	36.1918	67.2566	48.5636	62.6359	105.835	104.051	106.617	-0.383355	0.392848	NC	1.37827	0.000878685	UP	LOC104419209	GDSL esterase/lipase At5g14450
GO:0009505~plant-type cell wall	174	Eucgr.J00127	1.4829	1.93764	1.6002	3.36102	3.03083	1.02527	3.58137	3.28785	3.33016	4.37342	5.07053	4.96034	1.2369	0.00810009	UP	0.643748	0.161624	NC	LOC104420997	alpha-galactosidase 3
GO:0009505~plant-type cell wall	174	Eucgr.J00127	1.4829	1.93764	1.6002	3.36102	3.03083	1.02527	3.58137	3.28785	3.33016	4.37342	5.07053	4.96034	1.2369	0.00810009	UP	0.643748	0.161624	NC	LOC104420997	alpha-galactosidase 3
GO:0009505~plant-type cell wall	174	Eucgr.C04373	18.21	15.0835	18.8667	45.6236	39.9443	22.9969	24.813	25.5025	24.3737	48.6434	48.0239	52.5704	1.46617	0.000384593	UP	1.25039	0.00272592	UP	LOC104438607	bifunctional purple acid phosphatase 26
GO:0009505~plant-type cell wall	174	Eucgr.C00583	22.072	25.071	24.8943	8.25107	10.1248	7.07528	26.2224	20.9681	26.6468	9.42115	8.75513	9.23778	-1.10482	0.0084431	DOWN	-1.20459	0.00413932	DOWN	LOC104436240	bifunctional purple acid phosphatase 26
GO:0009505~plant-type cell wall	174	Eucgr.J00127	1.4829	1.93764	1.6002	3.36102	3.03083	1.02527	3.58137	3.28785	3.33016	4.37342	5.07053	4.96034	1.2369	0.00810009	UP	0.643748	0.161624	NC	LOC104420997	alpha-galactosidase 3
GO:0009505~plant-type cell wall	174	Eucgr.J00127	1.4829	1.93764	1.6002	3.36102	3.03083	1.02527	3.58137	3.28785	3.33016	4.37342	5.07053	4.96034	1.2369	0.00810009	UP	0.643748	0.161624	NC	LOC104420997	alpha-galactosidase 3
GO:0009505~plant-type cell wall	174	Eucgr.G01931	35.4824	30.2517	38.4772	68.8694	64.8148	57.2933	33.5415	30.2277	28.9111	38.6637	37.1861	38.2585	1.29223	0.00169698	UP	0.547138	0.212854	NC	LOC104453524	alpha-mannosidase At3g26720-like
GO:0009505~plant-type cell wall	174	Eucgr.G00651	0.376045	0.491454	0.921566	1.24417	0.726539	0.709904	0.530836	0.075246	0.280143	0.117717	0.260611	0.119571	1.05698	0.043473	UP	0	1	NC	LOC104452755	beta-xylosidase/alpha-L-arabinofuranosidase 2
GO:0009505~plant-type cell wall	174	Eucgr.G00654	0.116879	0.225735	0.062312	1.92651	2.72019	1.73332	2.68616	2.76319	2.66722	0.800827	0.583615	0.948031	4.41511	7.67e-15	UP	-2.06459	1.24e-05	DOWN	LOC104455038	beta-xylosidase/alpha-L-arabinofuranosidase 2
GO:0009505~plant-type cell wall	174	Eucgr.B02620	50.7663	60.8708	64.5127	105.201	135.216	71.196	295.711	303.16	312.966	287.126	314.211	287.84	1.23498	0.00283551	UP	0.204639	0.667013	NC	LOC104432979	defensin Ec-AMP-D2
GO:0009505~plant-type cell wall	174	Eucgr.G02844	76.5531	75.5619	80.5433	173.667	141.776	114.352	88.0833	85.8025	90.2849	111.739	115.681	116.453	1.28701	0.00176929	UP	0.636993	0.141462	NC	LOC104454222	dolichyl-diphosphooligosaccharide--protein glycosyltransferase subunit 1B
GO:0009505~plant-type cell wall	174	Eucgr.G02844	76.5531	75.5619	80.5433	173.667	141.776	114.352	88.0833	85.8025	90.2849	111.739	115.681	116.453	1.28701	0.00176929	UP	0.636993	0.141462	NC	LOC104454222	dolichyl-diphosphooligosaccharide--protein glycosyltransferase subunit 1B
GO:0009505~plant-type cell wall	174	Eucgr.G02844	76.5531	75.5619	80.5433	173.667	141.776	114.352	88.0833	85.8025	90.2849	111.739	115.681	116.453	1.28701	0.00176929	UP	0.636993	0.141462	NC	LOC104454222	dolichyl-diphosphooligosaccharide--protein glycosyltransferase subunit 1B
GO:0009505~plant-type cell wall	174	Eucgr.F04195	1055.74	594.908	956.816	1639.53	1466.88	1489.17	878.235	911.777	930.572	855.684	826.298	892.02	1.23258	0.00274239	UP	0.198914	0.676224	NC	LOC104450830	peroxidase 12
GO:0009505~plant-type cell wall	174	Eucgr.H01218	0.102433	0	0.233624	2.07604	1.87016	2.36613	0.294885	0	0	1.10935	0.71725	0.811703	4.48998	1.23e-11	UP	0	1	NC	LOC104456838	peroxidase 3
GO:0009505~plant-type cell wall	174	Eucgr.E04056	23.2068	17.2357	26.115	84.4366	59.6703	39.8076	65.6066	65.6921	65.3213	68.1961	68.8111	70.1555	1.86603	5.72e-06	UP	0.319926	0.484882	NC	LOC104445709	peroxidase 42
GO:0009505~plant-type cell wall	174	Eucgr.J02484	0.378145	0	0.101392	4.29933	3.35924	1.63078	1.11248	8.73451	4.84686	4.53808	4.70631	5.66684	4.5398	3.09e-15	UP	0.528452	0.257072	NC	LOC104422800	peroxidase 64
GO:0009505~plant-type cell wall	174	Eucgr.I01478	2074.86	1836.82	1903.6	507.107	676.302	973.368	1147.55	1285.03	1381.97	957.497	953.725	984.66	-1.01068	0.0149142	DOWN	-0.128528	0.791587	NC	LOC104418998	L-ascorbate oxidase homolog
GO:0009505~plant-type cell wall	174	Eucgr.I01478	2074.86	1836.82	1903.6	507.107	676.302	973.368	1147.55	1285.03	1381.97	957.497	953.725	984.66	-1.01068	0.0149142	DOWN	-0.128528	0.791587	NC	LOC104418998	L-ascorbate oxidase homolog
GO:0009505~plant-type cell wall	174	Eucgr.H01991	155.833	218.237	113.763	30.9143	49.2608	23.8082	244.222	195.54	202.163	334.582	325.82	345.436	-1.88527	4.23e-06	DOWN	0.897837	0.033598	NC	LOC104457259	L-ascorbate oxidase homolog
GO:0009505~plant-type cell wall	174	Eucgr.A02844	0	0	1.39565	39.9631	39.8851	8.2193	3.67841	52.2821	13.4401	24.1036	19.1397	23.7676	7.03234	3.11e-35	UP	0.185014	0.705407	NC	LOC104449271	peroxidase 66
GO:0009505~plant-type cell wall	174	Eucgr.K03531	139.571	152.057	204.944	89.6436	71.2611	62.1459	186.004	176.03	152.015	82.5694	117.818	114.597	-1.13049	0.00627801	DOWN	-0.506485	0.250401	NC	LOC104426806	protein disulfide-isomerase like 2-1
GO:0009505~plant-type cell wall	174	Eucgr.K03531	139.571	152.057	204.944	89.6436	71.2611	62.1459	186.004	176.03	152.015	82.5694	117.818	114.597	-1.13049	0.00627801	DOWN	-0.506485	0.250401	NC	LOC104426806	protein disulfide-isomerase like 2-1
GO:0009505~plant-type cell wall	174	Eucgr.K03531	139.571	152.057	204.944	89.6436	71.2611	62.1459	186.004	176.03	152.015	82.5694	117.818	114.597	-1.13049	0.00627801	DOWN	-0.506485	0.250401	NC	LOC104426806	protein disulfide-isomerase like 2-1
GO:0009505~plant-type cell wall	174	Eucgr.F01849	11.6115	8.14437	14.4309	4.97406	4.97223	3.12587	2.94461	4.92567	3.89208	10.7339	8.40257	9.9478	-1.09267	0.0105714	DOWN	1.55071	0.000257711	UP	LOC104448978	purple acid phosphatase
GO:0009505~plant-type cell wall	174	Eucgr.J02805	39.324	18.754	30.4731	14.5147	9.56917	9.87626	23.4373	30.5257	25.8627	11.6633	11.6678	12.3539	-1.07789	0.00996221	DOWN	-0.939444	0.0268505	NC	LOC104422976	subtilisin-like protease SBT1.4
GO:0009505~plant-type cell wall	174	Eucgr.H02279	101.674	90.8424	78.9903	10.6801	6.66596	3.47213	19.3849	32.38	21.4468	20.6399	18.0306	16.6813	-3.43772	1.11e-15	DOWN	-0.0205656	0.969748	NC	LOC104457384	subtilisin-like protease SBT1.7
GO:0009505~plant-type cell wall	174	Eucgr.J01392	98.4255	101.837	116.024	179.808	179.256	186.527	99.9176	90.0221	107.725	103.509	100.789	100.948	1.204	0.00347826	UP	0.271085	0.558685	NC	LOC104422036	protein COBRA
GO:0009505~plant-type cell wall	174	Eucgr.I01297	0.474139	0.197171	0.608471	2.19981	2.03032	1.94589	3.17364	1.94704	1.76674	1.72316	1.59754	0.976411	3.22586	2.71e-10	UP	-0.552936	0.258153	NC	LOC104418861	purple acid phosphatase
GO:0009505~plant-type cell wall	174	Eucgr.C03707	10.4414	7.02666	6.71933	2.45655	3.96742	3.20928	3.759	4.20589	3.22954	6.87335	8.20313	8.84999	-1.08991	0.0133639	DOWN	1.42409	0.000924062	UP	LOC104438202	uncharacterized LOC104438202
GO:0009505~plant-type cell wall	174	Eucgr.F03394	0.056057	0.214125	0.326604	0.870874	1.30433	0.429086	0.177497	0.199947	0.534708	0.621772	0.371676	0.690574	2.25144	5.89e-05	UP	0	1	NC	LOC104450188	putative beta-glucosidase 41
GO:0009505~plant-type cell wall	174	Eucgr.F03130	2.24432	3.1965	3.37439	8.1693	7.37238	2.65788	4.39195	7.08977	6.87502	6.0316	6.37543	6.80087	1.48711	0.000450704	UP	0.311633	0.506507	NC
GO:0009505~plant-type cell wall	174	Eucgr.A02027	58.2773	90.3579	74.3728	25.0112	21.4674	18.5222	52.4382	49.8968	54.3023	34.709	36.7302	32.4947	-1.42013	0.000561726	DOWN	-0.366634	0.418376	NC
GO:0009505~plant-type cell wall	174	Eucgr.F03130	2.24432	3.1965	3.37439	8.1693	7.37238	2.65788	4.39195	7.08977	6.87502	6.0316	6.37543	6.80087	1.48711	0.000450704	UP	0.311633	0.506507	NC
GO:0009505~plant-type cell wall	174	Eucgr.K02113	20.6326	27.4577	22.9636	27.8998	25.6042	20.3284	11.8282	15.8979	11.452	42.9726	42.1979	47.3222	0.441976	0.320889	NC	2.07199	5.67e-07	UP	LOC104425696	probable glucan endo-1,3-beta-glucosidase A6
GO:0009505~plant-type cell wall	174	Eucgr.K02113	20.6326	27.4577	22.9636	27.8998	25.6042	20.3284	11.8282	15.8979	11.452	42.9726	42.1979	47.3222	0.441976	0.320889	NC	2.07199	5.67e-07	UP	LOC104425696	probable glucan endo-1,3-beta-glucosidase A6
GO:0009505~plant-type cell wall	174	Eucgr.L02740	288.211	165.939	281.742	437.387	402.766	361.081	253.122	248.813	242.475	193.435	192.698	179.787	1.16404	0.00481087	UP	-0.0135193	0.980507	NC
GO:0009505~plant-type cell wall	174	Eucgr.F03538	390.82	408.088	393.469	176.081	163.665	73.1316	189.269	273.737	249.941	95.7168	90.8209	94.8323	-1.15343	0.00522532	DOWN	-1.12751	0.00691061	DOWN	LOC104450301	L-ascorbate oxidase homolog
GO:0009505~plant-type cell wall	174	Eucgr.F03538	390.82	408.088	393.469	176.081	163.665	73.1316	189.269	273.737	249.941	95.7168	90.8209	94.8323	-1.15343	0.00522532	DOWN	-1.12751	0.00691061	DOWN	LOC104450301	L-ascorbate oxidase homolog
GO:0009505~plant-type cell wall	174	Eucgr.A01166	28.3571	26.6617	33.951	0.193293	0	0	22.4317	24.36	22.5061	0.546035	0.327841	0.399638	-7.64247	4.11e-37	DOWN	-5.98625	2.86e-30	DOWN	LOC104435756	peroxidase 21
GO:0009505~plant-type cell wall	174	Eucgr.I00020	332.491	607.938	381.986	6.93511	6.85633	3.63861	108.215	155.846	161.243	17.0509	18.9063	17.8884	-6.10887	1.62e-36	DOWN	-2.82289	1.86e-11	DOWN	LOC104417991	peroxidase 47
GO:0009505~plant-type cell wall	174	Eucgr.A01385	46.4458	68.6496	38.6473	15.4159	9.41311	5.66846	78.4833	47.3605	76.8815	10.1547	11.2176	12.7424	-2.30086	4.28e-08	DOWN	-2.50455	2.48e-09	DOWN	LOC104437178	peroxidase 5
GO:0009505~plant-type cell wall	174	Eucgr.I01727	0	0	0	1.17113	0.941845	0.261876	1.32961	1.76755	1.67687	4.09308	4.34982	5.06357	7.07289	3.94e-09	UP	1.81139	4.66e-05	UP	LOC104419208	GDSL esterase/lipase At5g14450
GO:0009505~plant-type cell wall	174	Eucgr.C03710	2.56576	2.15108	3.41044	12.5016	9.08737	2.99325	2.96026	3.8151	3.02278	14.1399	14.4455	13.2955	2.09396	8.39e-07	UP	2.42283	1.11e-08	UP	LOC104438204	glucan endo-1,3-beta-glucosidase 13
GO:0009505~plant-type cell wall	174	Eucgr.C02145	11.0081	8.222	10.6742	119.526	109.561	85.6052	12.9132	6.01704	7.12436	70.098	71.7813	73.3793	3.84324	1.3e-18	UP	3.34097	7.88e-15	UP	LOC104437279	glucan endo-1,3-beta-glucosidase 5
GO:0009505~plant-type cell wall	174	Eucgr.I00988	3.21455	4.13603	2.84674	51.2804	61.2423	15.4962	5.88072	12.7995	6.9219	147.954	147.637	154.13	4.08279	3.98e-20	UP	4.42716	4.58e-23	UP	LOC104418615	L-ascorbate oxidase homolog
GO:0009505~plant-type cell wall	174	Eucgr.I00988	3.21455	4.13603	2.84674	51.2804	61.2423	15.4962	5.88072	12.7995	6.9219	147.954	147.637	154.13	4.08279	3.98e-20	UP	4.42716	4.58e-23	UP	LOC104418615	L-ascorbate oxidase homolog
GO:0009505~plant-type cell wall	174	Eucgr.I00988	3.21455	4.13603	2.84674	51.2804	61.2423	15.4962	5.88072	12.7995	6.9219	147.954	147.637	154.13	4.08279	3.98e-20	UP	4.42716	4.58e-23	UP	LOC104418615	L-ascorbate oxidase homolog
GO:0009505~plant-type cell wall	174	Eucgr.A01118	0.892688	1.23373	1.12946	10.5289	5.88601	3.88829	1.26642	1.2488	1.52357	4.54987	3.7767	3.55556	3.31434	3.7e-13	UP	1.80303	5.31e-05	UP	LOC104435289	L-ascorbate oxidase homolog
GO:0009505~plant-type cell wall	174	Eucgr.D01344	0.061934	0.059259	0.494182	1.00425	1.35343	0.335099	0.061613	0.683523	0.059328	2.79157	2.33397	2.28167	2.55453	1.82e-05	UP	3.907	1.99e-13	UP	LOC104441418	L-ascorbate oxidase homolog
GO:0009505~plant-type cell wall	174	Eucgr.K01543	25.4455	24.2321	26.7169	136.131	113.406	64.7789	13.1131	17.052	14.5919	34.743	62.064	62.374	2.477	2.32e-09	UP	2.34769	1.88e-08	UP	LOC104425309	NADH--cytochrome b5 reductase 1
GO:0009505~plant-type cell wall	174	Eucgr.K01543	25.4455	24.2321	26.7169	136.131	113.406	64.7789	13.1131	17.052	14.5919	34.743	62.064	62.374	2.477	2.32e-09	UP	2.34769	1.88e-08	UP	LOC104425309	NADH--cytochrome b5 reductase 1
GO:0009505~plant-type cell wall	174	Eucgr.C03260	76.3481	69.765	59.2273	59.7526	53.4658	36.9323	17.8278	24.5928	18.3039	42.0175	44.4248	41.032	-0.117862	0.811643	NC	1.36709	0.000991729	UP	LOC104437992	subtilisin-like protease SBT1.8
GO:0009505~plant-type cell wall	174	Eucgr.C03354	0.500074	0.162404	0.643342	0.461362	0.064335	0	1.48911	2.29762	0.421992	0.558175	0.573712	0.451337	0	1	NC	-1.52209	0.0165637	DOWN	LOC104438051	auxin-binding protein ABP19a
GO:0009505~plant-type cell wall	174	Eucgr.F04198	16.7601	13.8852	10.6071	343.191	509.732	1176.93	25.1871	29.3182	29.0954	145.05	137.402	149.705	6.15121	2.77e-37	UP	2.69191	1.23e-10	UP	LOC104450831	peroxidase 12
GO:0009505~plant-type cell wall	174	Eucgr.K02540	155.576	138.967	152.657	37.2321	24.7233	18.2958	97.021	116.073	100.39	38.6755	39.3988	37.5041	-2.12195	2.49e-07	DOWN	-1.21032	0.00368499	DOWN	LOC104426029	protein COBRA
GO:0009505~plant-type cell wall	174	Eucgr.K02540	155.576	138.967	152.657	37.2321	24.7233	18.2958	97.021	116.073	100.39	38.6755	39.3988	37.5041	-2.12195	2.49e-07	DOWN	-1.21032	0.00368499	DOWN	LOC104426029	protein COBRA
GO:0009505~plant-type cell wall	174	Eucgr.D01322	209.81	159.994	208.402	288.182	191.857	41.7881	186.963	249.552	207.302	82.6148	85.2782	84.0651	0.195598	0.678185	NC	-1.10971	0.00791668	DOWN	LOC104441401	peroxidase 42
GO:0009505~plant-type cell wall	174	Eucgr.D02155	60.2123	55.4883	61.0862	56.0043	51.2067	31.1336	21.9156	24.0691	21.2421	88.0357	88.9267	84.9807	-0.000305239	1	NC	2.2356	6.73e-08	UP	LOC104441984	probable methyltransferase PMT14
GO:0009505~plant-type cell wall	174	Eucgr.D02155	60.2123	55.4883	61.0862	56.0043	51.2067	31.1336	21.9156	24.0691	21.2421	88.0357	88.9267	84.9807	-0.000305239	1	NC	2.2356	6.73e-08	UP	LOC104441984	probable methyltransferase PMT14
GO:0009505~plant-type cell wall	174	Eucgr.H04033	19.7833	5.06524	13.3831	3.81299	3.77289	3.18444	12.7814	31.6623	14.9916	1.79716	1.32042	1.83239	-1.4652	0.000468111	DOWN	-3.35737	1.39e-14	DOWN	LOC104415223	putative beta-D-xylosidase
GO:0009505~plant-type cell wall	174	Eucgr.H04033	19.7833	5.06524	13.3831	3.81299	3.77289	3.18444	12.7814	31.6623	14.9916	1.79716	1.32042	1.83239	-1.4652	0.000468111	DOWN	-3.35737	1.39e-14	DOWN	LOC104415223	putative beta-D-xylosidase
GO:0009505~plant-type cell wall	174	Eucgr.K00150	2.32951	1.16166	2.91141	8.89693	9.65073	7.81681	5.51498	3.73501	5.9583	89.4294	95.3153	104.838	2.63518	3.49e-09	UP	4.6688	1.42e-24	UP	LOC104424336	protein EXORDIUM-like 3
GO:0009505~plant-type cell wall	174	Eucgr.F02441	13.1744	7.3265	9.39129	16.5814	11.3715	5.36348	10.3011	11.8966	10.8089	25.0423	23.9353	24.8535	0.511881	0.24803	NC	1.45467	0.00046284	UP	LOC104449382	probable beta-D-xylosidase 7
GO:0009505~plant-type cell wall	174	Eucgr.F02553	0.162932	0.118301	0.346877	0	0	0	0	0.524936	0	1.53309	1.75594	1.86706	0	1	NC	3.43206	1.29e-09	UP	LOC104449472	uncharacterized LOC104449472
GO:0009505~plant-type cell wall	174	Eucgr.C00797	34.7637	66.0464	21.5728	2.20584	1.28567	0.774022	7.08058	19.1981	12.1838	0.620964	0.676477	0.58804	-4.64102	6.28e-24	DOWN	-4.53876	9.58e-22	DOWN	LOC104436406	subtilisin-like protease SBT1.8
GO:0009505~plant-type cell wall	174	Eucgr.C00797	34.7637	66.0464	21.5728	2.20584	1.28567	0.774022	7.08058	19.1981	12.1838	0.620964	0.676477	0.58804	-4.64102	6.28e-24	DOWN	-4.53876	9.58e-22	DOWN	LOC104436406	subtilisin-like protease SBT1.8
GO:0009505~plant-type cell wall	174	Eucgr.G00649	13.5335	10.8579	12.2026	25.1961	14.8496	6.82001	8.64459	11.926	8.62936	27.3777	29.1799	28.546	0.703347	0.102012	NC	1.87916	5.7e-06	UP	LOC104452752	beta-xylosidase/alpha-L-arabinofuranosidase 2
GO:0009505~plant-type cell wall	174	Eucgr.G00650	0.953256	1.84811	1.36212	1.46074	1.25832	1.21985	0.486937	0.124075	0.332265	2.15527	2.42453	2.17354	0.317106	0.53321	NC	3.61331	5.02e-13	UP	LOC104452753	beta-xylosidase/alpha-L-arabinofuranosidase 2
GO:0009505~plant-type cell wall	174	Eucgr.I01304	0.797889	0.284207	1.68917	2.83534	4.068	6.71295	3.92978	1.48514	5.35021	5.88981	6.29141	5.62784	2.87009	1.01e-09	UP	1.04965	0.0172032	UP	LOC104418865	purple acid phosphatase 2
GO:0009505~plant-type cell wall	174	Eucgr.K02734	63.1442	31.2188	73.5345	847.804	900.626	820.059	71.9167	48.4112	45.5318	565.143	576.722	556.124	4.36865	6.34e-23	UP	3.65309	2.53e-17	UP	LOC104426168	SNF1-related protein kinase regulatory subunit gamma-1
GO:0009505~plant-type cell wall	174	Eucgr.H02274	15.394	13.9102	14.8476	68.2402	72.2015	120.576	36.9802	49.0445	36.9347	131.035	139.523	140.059	3.00211	9.42e-13	UP	2.05652	6.29e-07	UP	LOC104457378	subtilisin-like protease SBT1.7
GO:0009505~plant-type cell wall	174	Eucgr.D02423	0	0	0	7.96809	5.38351	1.28239	0.659511	1.3895	0.719937	3.93956	3.11356	4.59378	10.3775	4.16e-31	UP	2.42149	6.46e-08	UP	LOC104442218	subtilisin-like protease SBT4.14
GO:0009505~plant-type cell wall	174	Eucgr.F03539	4.99382	7.53035	5.76124	4.01984	4.26115	1.34739	5.1	5.86609	6.31011	1.25536	1.16676	1.39132	-0.717979	0.120018	NC	-3.16257	4.97e-11	DOWN
GO:0009505~plant-type cell wall	174	Eucgr.G00653	0.076419	0	0.054322	0	0	0	3.94216	5.55791	3.87282	1.46727	1.32865	1.00987	0	1	NC	-1.56712	0.000345845	DOWN
GO:0009505~plant-type cell wall	174	Eucgr.I01298	86.772	35.7534	96.0126	71.9387	88.1134	114.028	254.373	218.626	290.196	54.8179	55.2849	54.0325	0.791429	0.0611377	NC	-1.95943	2.02e-06	DOWN
GO:0009505~plant-type cell wall	174	Eucgr.I01302	43.6987	42.5692	50.9858	22.4882	21.2149	23.9842	100.576	98.4016	113.797	23.32	20.6546	23.9095	-0.319647	0.484019	NC	-1.90948	3.9e-06	DOWN
GO:0009505~plant-type cell wall	174	Eucgr.I01600	22.9908	18.4319	24.9307	88.075	78.4259	46.0107	54.9994	53.3092	52.0516	102.093	98.774	97.7008	2.07098	4.55e-07	UP	1.16031	0.00536818	UP
GO:0009505~plant-type cell wall	174	Eucgr.L02937	12.9316	7.0922	10.2454	70.0463	55.348	36.5234	13.485	16.6343	12.2019	46.7949	48.5299	49.5417	2.84117	1.64e-11	UP	2.01641	1.23e-06	UP
GO:0009505~plant-type cell wall	174	Eucgr.L03098	1.17415	1.38812	1.72062	0	0	0	0.992027	3.9689	1.47546	0	0	0	0	1	NC	-6.83296	1.23e-08	DOWN
GO:0009664~plant-type cell wall organization	93	Eucgr.I02676	30.156	32.2547	32.2503	34.8045	32.1959	20.1236	18.3132	19.4546	19.012	43.2304	41.2006	42.5541	0.206766	0.664152	NC	1.44224	0.000540361	UP	LOC104419917	3-hydroxyacyl-[acyl-carrier-protein] dehydratase FabZ
GO:0009664~plant-type cell wall organization	93	Eucgr.J00120	4.3661	5.19176	5.38876	0.1244	0	0.129286	5.60718	12.828	4.10162	0.6478	0	0.304473	-5.20972	1.59e-15	DOWN	-4.68084	4.61e-18	DOWN	LOC104420990	expansin-A8
GO:0009664~plant-type cell wall organization	93	Eucgr.F03090	181.44	146.053	170.792	1.2267	1.02312	0	80.9071	138.385	115.325	4.15205	2.76587	4.21522	-7.59969	1.99e-46	DOWN	-4.7535	2.83e-25	DOWN	LOC104449932	GDSL esterase/lipase APG
GO:0009664~plant-type cell wall organization	93	Eucgr.J00851	44.9928	53.6461	47.4175	138.29	118.809	59.1262	96.3214	104.979	97.4886	207.229	219.028	210.668	1.49196	0.000273677	UP	1.34157	0.00119108	UP	LOC104421584	delta(24)-sterol reductase
GO:0009664~plant-type cell wall organization	93	Eucgr.A00084	205.811	302.203	238.719	67.8394	58.0744	42.6697	173.339	153.867	176.579	120.78	128.709	122.959	-1.80328	1.09e-05	DOWN	-0.197177	0.679851	NC	LOC104433838	40S ribosomal protein S15a-1
GO:0009664~plant-type cell wall organization	93	Eucgr.B03214	2.84772	12.1052	3.09872	0.605225	0.445089	0.421576	2.72433	4.24193	2.73798	4.97875	4.45875	5.1107	-3.30708	3.54e-11	DOWN	0.916996	0.042127	NC	LOC104433444	expansin-A1
GO:0009664~plant-type cell wall organization	93	Eucgr.G00960	11.6238	8.86941	13.2271	0.749142	1.82789	0.685213	7.44902	6.74525	7.18898	3.89873	3.58383	3.98027	-3.16712	6.63e-13	DOWN	-0.625093	0.160466	NC	LOC104452903	root phototropism protein 3
GO:0009664~plant-type cell wall organization	93	Eucgr.G00960	11.6238	8.86941	13.2271	0.749142	1.82789	0.685213	7.44902	6.74525	7.18898	3.89873	3.58383	3.98027	-3.16712	6.63e-13	DOWN	-0.625093	0.160466	NC	LOC104452903	root phototropism protein 3
GO:0009664~plant-type cell wall organization	93	Eucgr.G02490	1.26863	1.49583	0.908045	10.4271	8.10439	3.06429	0.968992	1.73186	1.27872	15.1274	14.5442	14.074	3.1156	2.81e-11	UP	4.11129	1.67e-18	UP	LOC104453939	expansin-A1
GO:0009664~plant-type cell wall organization	93	Eucgr.G02490	1.26863	1.49583	0.908045	10.4271	8.10439	3.06429	0.968992	1.73186	1.27872	15.1274	14.5442	14.074	3.1156	2.81e-11	UP	4.11129	1.67e-18	UP	LOC104453939	expansin-A1
GO:0009664~plant-type cell wall organization	93	Eucgr.B00043	4.53403	5.99078	5.12795	2.38828	1.94957	1.85145	3.60144	5.56129	4.21988	1.92708	1.72699	1.96447	-1.04852	0.0164601	DOWN	-1.04791	0.0175655	DOWN	LOC104416288	isoamylase 3, chloroplastic
GO:0009664~plant-type cell wall organization	93	Eucgr.H05003	0	0.457023	0.113475	1.73141	1.71609	0.357987	0.316908	0.191519	0.206301	4.0488	3.68578	3.49903	3.74566	9.74e-08	UP	4.74072	4.39e-16	UP	LOC104415923	expansin-A20
GO:0009664~plant-type cell wall organization	93	Eucgr.L01079	8.53755	5.07898	6.32772	14.4971	9.57757	5.20657	1.62768	2.03901	2.32427	7.81489	7.40357	6.2214	0.798544	0.0799218	NC	2.12655	9.36e-06	UP	LOC104429176	50S ribosomal protein L18, chloroplastic
GO:0009664~plant-type cell wall organization	93	Eucgr.J02048	2.12109	0.990495	1.46869	108.274	100.819	86.3283	0.1463	0.309683	0	5.82407	4.64888	3.83231	6.67753	2.48e-39	UP	5.53024	3.87e-20	UP	LOC104422490	expansin-A4
GO:0009664~plant-type cell wall organization	93	Eucgr.B02355	9.50053	17.5561	11.7434	112.884	110.203	57.6884	5.84013	6.67397	4.876	189.304	197.617	187.196	3.38288	2.84e-15	UP	5.57408	5.2e-32	UP	LOC104432728	expansin-A4
GO:0009664~plant-type cell wall organization	93	Eucgr.G02938	1.84254	2.28367	3.02671	24.6392	13.0468	7.48004	4.88491	6.17572	5.51045	11.831	11.3005	11.4121	3.18482	5.59e-13	UP	1.38193	0.0011971	UP	LOC104454301	expansin-A4
GO:0009664~plant-type cell wall organization	93	Eucgr.F03232	9.43493	11.7474	12.0377	59.4922	59.0153	21.9754	22.2199	21.5159	23.3664	30.6301	29.6172	27.8208	2.46335	2.74e-09	UP	0.625524	0.15021	NC	LOC104450066	alpha,alpha-trehalose-phosphate synthase [UDP-forming] 1
GO:0009664~plant-type cell wall organization	93	Eucgr.G03134	3.5396	2.522	2.0362	41.8186	24.7477	22.9865	10.4593	11.4648	10.5005	15.3013	16.591	15.4164	4.19478	5.54e-20	UP	0.867276	0.046249	NC	LOC104454460	expansin-A8-like
GO:0009664~plant-type cell wall organization	93	Eucgr.F04195	1055.74	594.908	956.816	1639.53	1466.88	1489.17	878.235	911.777	930.572	855.684	826.298	892.02	1.23258	0.00274239	UP	0.198914	0.676224	NC	LOC104450830	peroxidase 12
GO:0009664~plant-type cell wall organization	93	Eucgr.A01166	28.3571	26.6617	33.951	0.193293	0	0	22.4317	24.36	22.5061	0.546035	0.327841	0.399638	-7.64247	4.11e-37	DOWN	-5.98625	2.86e-30	DOWN	LOC104435756	peroxidase 21
GO:0009664~plant-type cell wall organization	93	Eucgr.I00020	332.491	607.938	381.986	6.93511	6.85633	3.63861	108.215	155.846	161.243	17.0509	18.9063	17.8884	-6.10887	1.62e-36	DOWN	-2.82289	1.86e-11	DOWN	LOC104417991	peroxidase 47
GO:0009664~plant-type cell wall organization	93	Eucgr.A01385	46.4458	68.6496	38.6473	15.4159	9.41311	5.66846	78.4833	47.3605	76.8815	10.1547	11.2176	12.7424	-2.30086	4.28e-08	DOWN	-2.50455	2.48e-09	DOWN	LOC104437178	peroxidase 5
GO:0009664~plant-type cell wall organization	93	Eucgr.H01218	0.102433	0	0.233624	2.07604	1.87016	2.36613	0.294885	0	0	1.10935	0.71725	0.811703	4.48998	1.23e-11	UP	0	1	NC	LOC104456838	peroxidase 3
GO:0009664~plant-type cell wall organization	93	Eucgr.B03623	24.0126	35.8076	23.5159	19.4772	20.2838	13.1974	18.2144	23.2914	23.902	40.8205	39.822	40.8606	-0.301641	0.515741	NC	1.25946	0.00262491	UP	LOC104433790	protein YLS3
GO:0009664~plant-type cell wall organization	93	Eucgr.K00711	12.0901	8.41251	11.3684	60.7404	54.003	21.405	2.59925	3.36026	2.84079	73.8467	62.6861	68.9418	2.46854	3.75e-09	UP	4.95515	3.58e-26	UP	LOC104424682	fasciclin-like arabinogalactan protein 7
GO:0009664~plant-type cell wall organization	93	Eucgr.E04056	23.2068	17.2357	26.115	84.4366	59.6703	39.8076	65.6066	65.6921	65.3213	68.1961	68.8111	70.1555	1.86603	5.72e-06	UP	0.319926	0.484882	NC	LOC104445709	peroxidase 42
GO:0009664~plant-type cell wall organization	93	Eucgr.A02844	0	0	1.39565	39.9631	39.8851	8.2193	3.67841	52.2821	13.4401	24.1036	19.1397	23.7676	7.03234	3.11e-35	UP	0.185014	0.705407	NC	LOC104449271	peroxidase 66
GO:0009664~plant-type cell wall organization	93	Eucgr.L02740	288.211	165.939	281.742	437.387	402.766	361.081	253.122	248.813	242.475	193.435	192.698	179.787	1.16404	0.00481087	UP	-0.0135193	0.980507	NC
GO:0009664~plant-type cell wall organization	93	Eucgr.C00732	1.13326	1.7098	1.03005	35.8019	26.4856	28.5284	1.22022	2.12587	1.02261	37.4435	38.1553	38.4674	5.79481	2.48e-31	UP	5.6927	1.45e-31	UP	LOC104436354	LRR receptor-like serine/threonine-protein kinase ERECTA
GO:0009664~plant-type cell wall organization	93	Eucgr.C03260	76.3481	69.765	59.2273	59.7526	53.4658	36.9323	17.8278	24.5928	18.3039	42.0175	44.4248	41.032	-0.117862	0.811643	NC	1.36709	0.000991729	UP	LOC104437992	subtilisin-like protease SBT1.8
GO:0009664~plant-type cell wall organization	93	Eucgr.F04198	16.7601	13.8852	10.6071	343.191	509.732	1176.93	25.1871	29.3182	29.0954	145.05	137.402	149.705	6.15121	2.77e-37	UP	2.69191	1.23e-10	UP	LOC104450831	peroxidase 12
GO:0009664~plant-type cell wall organization	93	Eucgr.D01322	209.81	159.994	208.402	288.182	191.857	41.7881	186.963	249.552	207.302	82.6148	85.2782	84.0651	0.195598	0.678185	NC	-1.10971	0.00791668	DOWN	LOC104441401	peroxidase 42
GO:0009664~plant-type cell wall organization	93	Eucgr.C00797	34.7637	66.0464	21.5728	2.20584	1.28567	0.774022	7.08058	19.1981	12.1838	0.620964	0.676477	0.58804	-4.64102	6.28e-24	DOWN	-4.53876	9.58e-22	DOWN	LOC104436406	subtilisin-like protease SBT1.8
GO:0009664~plant-type cell wall organization	93	Eucgr.C00797	34.7637	66.0464	21.5728	2.20584	1.28567	0.774022	7.08058	19.1981	12.1838	0.620964	0.676477	0.58804	-4.64102	6.28e-24	DOWN	-4.53876	9.58e-22	DOWN	LOC104436406	subtilisin-like protease SBT1.8
GO:0009664~plant-type cell wall organization	93	Eucgr.G02746	2.17119	2.64858	2.21154	1.34001	1.27069	0.773025	3.68843	2.21782	3.09997	1.04426	0.511032	0.56156	-0.762546	0.100835	NC	-1.90879	2.06e-05	DOWN	LOC104454143	pullulanase 1, chloroplastic
GO:0009664~plant-type cell wall organization	93	Eucgr.G02746	2.17119	2.64858	2.21154	1.34001	1.27069	0.773025	3.68843	2.21782	3.09997	1.04426	0.511032	0.56156	-0.762546	0.100835	NC	-1.90879	2.06e-05	DOWN	LOC104454143	pullulanase 1, chloroplastic
GO:0009664~plant-type cell wall organization	93	Eucgr.G01772	0.473694	0.513206	0.537328	34.3053	28.5903	7.37055	0.408549	0.327912	0.298468	41.8257	42.1838	38.9891	6.28347	7.34e-34	UP	7.67744	1.71e-43	UP	LOC104453420	thaumatin-like protein 1b
GO:0009664~plant-type cell wall organization	93	Eucgr.A01273	25.0397	32.4801	25.1685	2.586	3.76668	3.86735	60.779	59.1024	71.0616	11.7003	14.0629	13.5813	-2.73539	2.15e-10	DOWN	-2.09352	4.61e-07	DOWN	LOC104436617	uncharacterized protein At5g02240
GO:0009664~plant-type cell wall organization	93	Eucgr.E03228	13.0429	8.68579	10.477	9.98879	6.34702	2.92328	8.38712	14.0114	8.62248	4.05352	3.34745	3.54182	-0.390736	0.38838	NC	-1.2782	0.00242808	DOWN
GO:0009664~plant-type cell wall organization	93	Eucgr.G01091	0.17338	0.8604	0.536758	0	0.289113	0	1.19599	0.134257	0.138953	0.114574	0.33154	0.323349	0	1	NC	-2.30173	8.88e-05	DOWN
GO:0009827~plant-type cell wall modification	26	Eucgr.F02981	8.66036	12.8291	12.5862	0.90828	0.590307	0.368856	14.9631	8.47729	20.3198	0	0	0.118473	-3.9254	8.24e-15	DOWN	-7.49043	8.31e-30	DOWN	AGL	amylo-alpha-1, 6-glucosidase, 4-alpha-glucanotransferase
GO:0009827~plant-type cell wall modification	26	Eucgr.I01394	0.844828	1.5271	0.593246	0.615822	0.477031	0.3947	0.879167	0.865809	1.07544	0.168452	0.105118	0.228828	-0.779856	0.187591	NC	-2.64383	2.26e-05	DOWN	LOC104418924	uncharacterized LOC104418924
GO:0009827~plant-type cell wall modification	26	Eucgr.H05090	0	0	0.055667	1.37845	1.11427	0.237026	0	0.501014	0.101543	0.839119	1.12555	1.00424	5.75511	5.31e-14	UP	3.10386	3.68e-08	UP	LOC104415986	beta-galactosidase 6
GO:0009827~plant-type cell wall modification	26	Eucgr.K02974	0.065357	0.067986	0	0.491397	0.414193	0	0.289981	4.11937	0.910127	0.184626	0	0.343294	0	1	NC	-3.21093	8.5e-09	DOWN	LOC104426370	protein trichome birefringence-like 3
GO:0009827~plant-type cell wall modification	26	Eucgr.A02545	1.3057	1.07751	1.78012	1.34424	1.54805	1.42901	1.54526	1.81303	1.97261	2.83548	3.15751	2.60123	0.486439	0.344481	NC	1.05191	0.0191566	UP	LOC104446669	calcium-dependent protein kinase 20
GO:0009827~plant-type cell wall modification	26	Eucgr.E03124	21.7002	19.8129	19.8948	116.68	153.869	124.654	68.4609	54.9777	35.2902	248.052	235.081	237.628	3.04042	6.48e-13	UP	2.43949	4.41e-09	UP	LOC104445178	sphingolipid delta(4)-desaturase DES1-like
GO:0009827~plant-type cell wall modification	26	Eucgr.L02776	6.2797	5.56909	5.66298	42.0194	55.8391	46.2518	35.5829	26.5046	19.714	114.684	113.454	109.626	3.606	5.3e-16	UP	2.22793	9.17e-08	UP
GO:0009828~plant-type cell wall loosening	9	Eucgr.F02908	29.3835	26.1092	25.2511	12.5037	10.5174	6.9141	14.7978	15.5434	13.7165	12.8608	10.5593	10.2488	-1.10263	0.00855934	DOWN	-0.0813122	0.874858	NC	LOC104449761	expansin-A13
GO:0009828~plant-type cell wall loosening	9	Eucgr.E01615	0	0	0	2.87163	3.13602	0.868979	0	0	0.29905	3.24038	2.78563	3.74905	7.98056	6.65e-14	UP	4.51764	7.78e-12	UP	LOC104444457	putative expansin-B2
GO:0009828~plant-type cell wall loosening	9	Eucgr.E01620	0	0	0	2.7815	2.32049	1.47376	0	0	0.368838	4.62667	4.75602	5.32167	7.35572	1.94e-10	UP	4.88341	1.72e-09	UP	LOC104444460	putative expansin-B2
GO:0009828~plant-type cell wall loosening	9	Eucgr.E01620	0	0	0	2.7815	2.32049	1.47376	0	0	0.368838	4.62667	4.75602	5.32167	7.35572	1.94e-10	UP	4.88341	1.72e-09	UP	LOC104444460	putative expansin-B2
GO:0009828~plant-type cell wall loosening	9	Eucgr.E01625	0	0	0	4.10708	1.85431	1.60845	0.229843	0.350841	0.099989	8.71638	8.45915	9.85848	8.33247	3.78e-16	UP	5.74285	2.47e-23	UP	LOC104444465	putative expansin-B2
GO:0009831~plant-type cell wall modification involved in multidimensional cell growth	2	Eucgr.F02908	29.3835	26.1092	25.2511	12.5037	10.5174	6.9141	14.7978	15.5434	13.7165	12.8608	10.5593	10.2488	-1.10263	0.00855934	DOWN	-0.0813122	0.874858	NC	LOC104449761	expansin-A13
GO:0009831~plant-type cell wall modification involved in multidimensional cell growth	2	Eucgr.B03348	14.8974	20.0886	13.6863	1.40293	1.54082	0.36886	1.51987	3.36637	4.93259	2.02265	2.05792	2.03728	-3.15347	2.61e-12	DOWN	-0.0283071	0.974435	NC	LOC104433548	probable xyloglucan endotransglucosylase/hydrolase protein 33
GO:0009832~plant-type cell wall biogenesis	51	Eucgr.I00378	78.3614	53.3473	80.844	106.337	106.503	84.7402	49.3824	59.3199	52.0736	118.871	123.553	117.454	0.888829	0.0337197	NC	1.41808	0.00060071	UP	LOC104418234	uncharacterized LOC104418234
GO:0009832~plant-type cell wall biogenesis	51	Eucgr.I00378	78.3614	53.3473	80.844	106.337	106.503	84.7402	49.3824	59.3199	52.0736	118.871	123.553	117.454	0.888829	0.0337197	NC	1.41808	0.00060071	UP	LOC104418234	uncharacterized LOC104418234
GO:0009832~plant-type cell wall biogenesis	51	Eucgr.I00378	78.3614	53.3473	80.844	106.337	106.503	84.7402	49.3824	59.3199	52.0736	118.871	123.553	117.454	0.888829	0.0337197	NC	1.41808	0.00060071	UP	LOC104418234	uncharacterized LOC104418234
GO:0009832~plant-type cell wall biogenesis	51	Eucgr.I00378	78.3614	53.3473	80.844	106.337	106.503	84.7402	49.3824	59.3199	52.0736	118.871	123.553	117.454	0.888829	0.0337197	NC	1.41808	0.00060071	UP	LOC104418234	uncharacterized LOC104418234
GO:0009832~plant-type cell wall biogenesis	51	Eucgr.I00378	78.3614	53.3473	80.844	106.337	106.503	84.7402	49.3824	59.3199	52.0736	118.871	123.553	117.454	0.888829	0.0337197	NC	1.41808	0.00060071	UP	LOC104418234	uncharacterized LOC104418234
GO:0009832~plant-type cell wall biogenesis	51	Eucgr.I00378	78.3614	53.3473	80.844	106.337	106.503	84.7402	49.3824	59.3199	52.0736	118.871	123.553	117.454	0.888829	0.0337197	NC	1.41808	0.00060071	UP	LOC104418234	uncharacterized LOC104418234
GO:0009832~plant-type cell wall biogenesis	51	Eucgr.I02676	30.156	32.2547	32.2503	34.8045	32.1959	20.1236	18.3132	19.4546	19.012	43.2304	41.2006	42.5541	0.206766	0.664152	NC	1.44224	0.000540361	UP	LOC104419917	3-hydroxyacyl-[acyl-carrier-protein] dehydratase FabZ
GO:0009832~plant-type cell wall biogenesis	51	Eucgr.K03590	6.15397	6.84029	6.8251	13.1764	13.0672	6.19007	4.36031	4.64722	3.4035	10.9171	11.1216	10.4903	1.10582	0.00806432	UP	1.68833	5.04e-05	UP	LOC104426864	CLIP-associated protein
GO:0009832~plant-type cell wall biogenesis	51	Eucgr.J03017	15.7879	16.005	17.8834	24.6697	24.1415	20.2272	16.4971	13.947	13.7551	28.1784	28.7405	26.9577	0.885514	0.0361413	NC	1.20456	0.00403672	UP	LOC104423135	katanin p60 ATPase-containing subunit A1
GO:0009832~plant-type cell wall biogenesis	51	Eucgr.F03090	181.44	146.053	170.792	1.2267	1.02312	0	80.9071	138.385	115.325	4.15205	2.76587	4.21522	-7.59969	1.99e-46	DOWN	-4.7535	2.83e-25	DOWN	LOC104449932	GDSL esterase/lipase APG
GO:0009832~plant-type cell wall biogenesis	51	Eucgr.J00769	83.4669	64.9171	71.3071	23.5425	18.2534	22.4447	76.103	66.4571	59.542	43.3927	45.2259	46.3898	-1.43734	0.000478865	DOWN	-0.327422	0.473551	NC	LOC104421518	dicarboxylate transporter 1, chloroplastic
GO:0009832~plant-type cell wall biogenesis	51	Eucgr.B03204	23.4155	19.3844	21.5606	8.51977	6.47449	4.84127	15.0194	17.9088	16.0705	10.82	11.4207	11.6539	-1.39645	0.00079696	DOWN	-0.25966	0.581699	NC	LOC104433435	galactoside 2-alpha-L-fucosyltransferase
GO:0009832~plant-type cell wall biogenesis	51	Eucgr.G00960	11.6238	8.86941	13.2271	0.749142	1.82789	0.685213	7.44902	6.74525	7.18898	3.89873	3.58383	3.98027	-3.16712	6.63e-13	DOWN	-0.625093	0.160466	NC	LOC104452903	root phototropism protein 3
GO:0009832~plant-type cell wall biogenesis	51	Eucgr.G00960	11.6238	8.86941	13.2271	0.749142	1.82789	0.685213	7.44902	6.74525	7.18898	3.89873	3.58383	3.98027	-3.16712	6.63e-13	DOWN	-0.625093	0.160466	NC	LOC104452903	root phototropism protein 3
GO:0009832~plant-type cell wall biogenesis	51	Eucgr.L01079	8.53755	5.07898	6.32772	14.4971	9.57757	5.20657	1.62768	2.03901	2.32427	7.81489	7.40357	6.2214	0.798544	0.0799218	NC	2.12655	9.36e-06	UP	LOC104429176	50S ribosomal protein L18, chloroplastic
GO:0009832~plant-type cell wall biogenesis	51	Eucgr.K00711	12.0901	8.41251	11.3684	60.7404	54.003	21.405	2.59925	3.36026	2.84079	73.8467	62.6861	68.9418	2.46854	3.75e-09	UP	4.95515	3.58e-26	UP	LOC104424682	fasciclin-like arabinogalactan protein 7
GO:0009832~plant-type cell wall biogenesis	51	Eucgr.B03623	24.0126	35.8076	23.5159	19.4772	20.2838	13.1974	18.2144	23.2914	23.902	40.8205	39.822	40.8606	-0.301641	0.515741	NC	1.25946	0.00262491	UP	LOC104433790	protein YLS3
GO:0009832~plant-type cell wall biogenesis	51	Eucgr.C04159	162.876	128.811	145.037	859.485	763.87	651.881	362.865	364.046	332.798	369.774	374.739	375.66	2.78221	2.44e-11	UP	0.334156	0.462401	NC	LOC104438492	3-ketoacyl-CoA synthase 11
GO:0009832~plant-type cell wall biogenesis	51	Eucgr.F03232	9.43493	11.7474	12.0377	59.4922	59.0153	21.9754	22.2199	21.5159	23.3664	30.6301	29.6172	27.8208	2.46335	2.74e-09	UP	0.625524	0.15021	NC	LOC104450066	alpha,alpha-trehalose-phosphate synthase [UDP-forming] 1
GO:0009832~plant-type cell wall biogenesis	51	Eucgr.A01172	0.097152	0.188002	0.207642	4.98846	2.34621	0.587451	0.670501	10.0118	2.89577	1.56212	2.44871	2.60004	4.44219	1.24e-15	UP	-0.843397	0.0618639	NC	LOC104435787	probable beta-1,4-xylosyltransferase IRX9
GO:0009832~plant-type cell wall biogenesis	51	Eucgr.D01959	130.459	83.4245	108.606	24.2818	26.5848	35.7744	64.3571	79.4744	72.2832	29.3785	31.4939	28.9153	-1.5427	0.000174121	DOWN	-1.04847	0.0126937	DOWN	LOC104441836	probable sugar phosphate/phosphate translocator At1g12500
GO:0009832~plant-type cell wall biogenesis	51	Eucgr.F00995	0	0	0.702548	2.81388	2.62861	0.228906	0.656572	5.14346	1.4479	1.55396	0.986958	1.81307	5.31258	7.47e-09	UP	-0.257301	0.719433	NC	LOC104448351	probable galacturonosyltransferase 12
GO:0009832~plant-type cell wall biogenesis	51	Eucgr.F00995	0	0	0.702548	2.81388	2.62861	0.228906	0.656572	5.14346	1.4479	1.55396	0.986958	1.81307	5.31258	7.47e-09	UP	-0.257301	0.719433	NC	LOC104448351	probable galacturonosyltransferase 12
GO:0009832~plant-type cell wall biogenesis	51	Eucgr.C03260	76.3481	69.765	59.2273	59.7526	53.4658	36.9323	17.8278	24.5928	18.3039	42.0175	44.4248	41.032	-0.117862	0.811643	NC	1.36709	0.000991729	UP	LOC104437992	subtilisin-like protease SBT1.8
GO:0009832~plant-type cell wall biogenesis	51	Eucgr.C00797	34.7637	66.0464	21.5728	2.20584	1.28567	0.774022	7.08058	19.1981	12.1838	0.620964	0.676477	0.58804	-4.64102	6.28e-24	DOWN	-4.53876	9.58e-22	DOWN	LOC104436406	subtilisin-like protease SBT1.8
GO:0009832~plant-type cell wall biogenesis	51	Eucgr.C00797	34.7637	66.0464	21.5728	2.20584	1.28567	0.774022	7.08058	19.1981	12.1838	0.620964	0.676477	0.58804	-4.64102	6.28e-24	DOWN	-4.53876	9.58e-22	DOWN	LOC104436406	subtilisin-like protease SBT1.8
GO:0009832~plant-type cell wall biogenesis	51	Eucgr.I02055	22.3539	24.6217	21.7744	1.19875	2.09166	1.03059	13.3369	22.211	22.0693	2.03288	2.68455	2.14177	-3.72371	2.82e-16	DOWN	-2.82753	7.79e-11	DOWN	LOC104419440	UDP-arabinopyranose mutase 1
GO:0009832~plant-type cell wall biogenesis	51	Eucgr.E03228	13.0429	8.68579	10.477	9.98879	6.34702	2.92328	8.38712	14.0114	8.62248	4.05352	3.34745	3.54182	-0.390736	0.38838	NC	-1.2782	0.00242808	DOWN
GO:0009833~plant-type primary cell wall biogenesis	3	Eucgr.J01278	15.7719	13.2152	16.8315	4.64806	3.68234	1.81427	7.45823	8.50672	6.00648	3.72553	3.09851	4.14957	-1.82348	1.09e-05	DOWN	-0.735203	0.0916116	NC	LOC104421950	cellulose synthase A catalytic subunit 3 [UDP-forming]
GO:0009833~plant-type primary cell wall biogenesis	3	Eucgr.G03380	408.497	367.406	429.531	106.573	93.6704	73.9013	224.701	249.218	237.496	125.302	134.926	133.284	-1.75279	1.81e-05	DOWN	-0.616949	0.154603	NC	LOC104454655	cellulose synthase A catalytic subunit 3 [UDP-forming]-like
GO:0009833~plant-type primary cell wall biogenesis	3	Eucgr.G03380	408.497	367.406	429.531	106.573	93.6704	73.9013	224.701	249.218	237.496	125.302	134.926	133.284	-1.75279	1.81e-05	DOWN	-0.616949	0.154603	NC	LOC104454655	cellulose synthase A catalytic subunit 3 [UDP-forming]-like
GO:0009834~plant-type secondary cell wall biogenesis	37	Eucgr.K02541	1.18629	2.15126	0.70646	6.67663	7.10083	2.4187	1.98174	4.17816	3.2834	3.0502	4.23803	3.28428	6.09513	2.03e-23	UP	1.04027	0.0231376	UP	LOC104426030	COBRA-like protein 4
GO:0009834~plant-type secondary cell wall biogenesis	37	Eucgr.J00851	44.9928	53.6461	47.4175	138.29	118.809	59.1262	96.3214	104.979	97.4886	207.229	219.028	210.668	1.49196	0.000273677	UP	1.34157	0.00119108	UP	LOC104421584	delta(24)-sterol reductase
GO:0009834~plant-type secondary cell wall biogenesis	37	Eucgr.K02191	64.5666	51.596	61.1938	84.9664	83.379	66.9116	37.6193	48.7483	44.5806	82.1436	80.0499	84.6649	0.793908	0.060386	NC	1.15142	0.00584311	UP	LOC104425757	probable beta-1,4-xylosyltransferase IRX10L
GO:0009834~plant-type secondary cell wall biogenesis	37	Eucgr.J01278	15.7719	13.2152	16.8315	4.64806	3.68234	1.81427	7.45823	8.50672	6.00648	3.72553	3.09851	4.14957	-1.82348	1.09e-05	DOWN	-0.735203	0.0916116	NC	LOC104421950	cellulose synthase A catalytic subunit 3 [UDP-forming]
GO:0009834~plant-type secondary cell wall biogenesis	37	Eucgr.G03380	408.497	367.406	429.531	106.573	93.6704	73.9013	224.701	249.218	237.496	125.302	134.926	133.284	-1.75279	1.81e-05	DOWN	-0.616949	0.154603	NC	LOC104454655	cellulose synthase A catalytic subunit 3 [UDP-forming]-like
GO:0009834~plant-type secondary cell wall biogenesis	37	Eucgr.H02219	1.3007	1.80933	2.41668	0.976411	0.641066	0.277137	0.354936	4.4654	0.299349	0.186005	0.284787	0.20413	-1.15542	0.0227985	DOWN	-3.30014	1.28e-08	DOWN	LOC104457357	probable beta-1,4-xylosyltransferase IRX14H
GO:0009834~plant-type secondary cell wall biogenesis	37	Eucgr.G03380	408.497	367.406	429.531	106.573	93.6704	73.9013	224.701	249.218	237.496	125.302	134.926	133.284	-1.75279	1.81e-05	DOWN	-0.616949	0.154603	NC	LOC104454655	cellulose synthase A catalytic subunit 3 [UDP-forming]-like
GO:0009834~plant-type secondary cell wall biogenesis	37	Eucgr.A01324	2.18475	4.33164	4.46046	16.2506	13.4288	6.61061	8.8003	34.2067	11.9129	6.33067	6.75869	7.31965	2.20704	1.22e-07	UP	-1.19573	0.00434168	DOWN	LOC104436967	cellulose synthase A catalytic subunit 4 [UDP-forming]
GO:0009834~plant-type secondary cell wall biogenesis	37	Eucgr.C00246	0.225803	0.212209	0.431327	10.7938	11.8123	2.19845	2.19511	16.5707	3.01019	4.53212	3.9713	4.66557	5.18532	4.58e-26	UP	-0.517088	0.248037	NC	LOC104436022	cellulose synthase A catalytic subunit 7 [UDP-forming]
GO:0009834~plant-type secondary cell wall biogenesis	37	Eucgr.C00246	0.225803	0.212209	0.431327	10.7938	11.8123	2.19845	2.19511	16.5707	3.01019	4.53212	3.9713	4.66557	5.18532	4.58e-26	UP	-0.517088	0.248037	NC	LOC104436022	cellulose synthase A catalytic subunit 7 [UDP-forming]
GO:0009834~plant-type secondary cell wall biogenesis	37	Eucgr.C00246	0.225803	0.212209	0.431327	10.7938	11.8123	2.19845	2.19511	16.5707	3.01019	4.53212	3.9713	4.66557	5.18532	4.58e-26	UP	-0.517088	0.248037	NC	LOC104436022	cellulose synthase A catalytic subunit 7 [UDP-forming]
GO:0009834~plant-type secondary cell wall biogenesis	37	Eucgr.C00246	0.225803	0.212209	0.431327	10.7938	11.8123	2.19845	2.19511	16.5707	3.01019	4.53212	3.9713	4.66557	5.18532	4.58e-26	UP	-0.517088	0.248037	NC	LOC104436022	cellulose synthase A catalytic subunit 7 [UDP-forming]
GO:0009834~plant-type secondary cell wall biogenesis	37	Eucgr.D00476	0.05763	0	0.415989	14.018	11.6169	1.95213	1.57195	20.9939	4.10256	3.82364	4.58231	3.89361	6.16301	1.88e-31	UP	-0.928793	0.0301844	NC	LOC104440888	cellulose synthase A catalytic subunit 8 [UDP-forming]
GO:0009834~plant-type secondary cell wall biogenesis	37	Eucgr.J01393	0	0	0.504302	3.94121	2.60133	0.393931	0.672967	9.00452	2.02818	2.09736	1.89576	2.18221	6.88143	2.83e-08	UP	0.617297	0.275152	NC	LOC104422037	COBRA-like protein 4
GO:0009834~plant-type secondary cell wall biogenesis	37	Eucgr.A01158	0.209011	0	1.53481	14.9493	11.9737	0.677918	4.41387	62.9675	13.1149	4.44416	3.66595	3.53308	4.74563	2.18e-19	UP	-2.59653	1.55e-09	DOWN	LOC104435678	fasciclin-like arabinogalactan protein 11
GO:0009834~plant-type secondary cell wall biogenesis	37	Eucgr.G01977	3.93171	3.93827	4.44552	12.3209	12.8208	5.90539	3.99531	9.4419	6.03315	8.59661	7.76405	8.29236	1.69846	5.7e-05	UP	0.605589	0.173888	NC	LOC104453563	probable beta-1,4-xylosyltransferase IRX10
GO:0009834~plant-type secondary cell wall biogenesis	37	Eucgr.H04942	0.048036	0.116925	0.257646	1.57541	0.956948	0.233032	0.192113	3.84554	0.986119	1.04972	0.828735	0.885727	3.27079	3.19e-08	UP	-0.768686	0.109924	NC	LOC104415874	UDP-glucuronate:xylan alpha-glucuronosyltransferase 1
GO:0009834~plant-type secondary cell wall biogenesis	37	Eucgr.H04942	0.048036	0.116925	0.257646	1.57541	0.956948	0.233032	0.192113	3.84554	0.986119	1.04972	0.828735	0.885727	3.27079	3.19e-08	UP	-0.768686	0.109924	NC	LOC104415874	UDP-glucuronate:xylan alpha-glucuronosyltransferase 1
GO:0009834~plant-type secondary cell wall biogenesis	37	Eucgr.F00232	2.11713	1.80505	2.68332	3.24323	1.42018	1.41839	2.83315	10.6649	5.3582	2.02816	2.74566	2.9654	0.215368	0.687769	NC	-1.05301	0.0165637	DOWN	LOC104447899	UDP-glucuronate:xylan alpha-glucuronosyltransferase 2
GO:0009834~plant-type secondary cell wall biogenesis	37	Eucgr.F00232	2.11713	1.80505	2.68332	3.24323	1.42018	1.41839	2.83315	10.6649	5.3582	2.02816	2.74566	2.9654	0.215368	0.687769	NC	-1.05301	0.0165637	DOWN	LOC104447899	UDP-glucuronate:xylan alpha-glucuronosyltransferase 2
GO:0009834~plant-type secondary cell wall biogenesis	37	Eucgr.F00232	2.11713	1.80505	2.68332	3.24323	1.42018	1.41839	2.83315	10.6649	5.3582	2.02816	2.74566	2.9654	0.215368	0.687769	NC	-1.05301	0.0165637	DOWN	LOC104447899	UDP-glucuronate:xylan alpha-glucuronosyltransferase 2
GO:0009834~plant-type secondary cell wall biogenesis	37	Eucgr.F00232	2.11713	1.80505	2.68332	3.24323	1.42018	1.41839	2.83315	10.6649	5.3582	2.02816	2.74566	2.9654	0.215368	0.687769	NC	-1.05301	0.0165637	DOWN	LOC104447899	UDP-glucuronate:xylan alpha-glucuronosyltransferase 2
GO:0009834~plant-type secondary cell wall biogenesis	37	Eucgr.F01611	42.8614	49.9596	52.5334	259.91	234.35	46.9848	60.6411	74.2691	65.2825	170.172	138.043	134.123	2.32545	1.69e-08	UP	1.44891	0.000458515	UP	LOC104448797	protein WALLS ARE THIN 1
GO:0009834~plant-type secondary cell wall biogenesis	37	Eucgr.F01611	42.8614	49.9596	52.5334	259.91	234.35	46.9848	60.6411	74.2691	65.2825	170.172	138.043	134.123	2.32545	1.69e-08	UP	1.44891	0.000458515	UP	LOC104448797	protein WALLS ARE THIN 1
GO:0009834~plant-type secondary cell wall biogenesis	37	Eucgr.F01611	42.8614	49.9596	52.5334	259.91	234.35	46.9848	60.6411	74.2691	65.2825	170.172	138.043	134.123	2.32545	1.69e-08	UP	1.44891	0.000458515	UP	LOC104448797	protein WALLS ARE THIN 1
GO:0009834~plant-type secondary cell wall biogenesis	37	Eucgr.F01847	0	0	0	22.4473	12.3678	1.7543	1.12247	2.93633	2.61021	16.0544	16.8358	15.0459	11.2492	3.39e-38	UP	3.25371	1.49e-13	UP	LOC104448977	protein WALLS ARE THIN 1
GO:0009834~plant-type secondary cell wall biogenesis	37	Eucgr.F01847	0	0	0	22.4473	12.3678	1.7543	1.12247	2.93633	2.61021	16.0544	16.8358	15.0459	11.2492	3.39e-38	UP	3.25371	1.49e-13	UP	LOC104448977	protein WALLS ARE THIN 1
GO:0009920~cell plate formation involved in plant-type cell wall biogenesis	3	Eucgr.E00053	257.992	290.948	274.097	67.671	79.548	84.6057	288.867	281.158	302.884	92.7171	92.9136	93.5674	-1.40484	0.000616705	DOWN	-1.40412	0.000684813	DOWN	LOC104443361	dynamin-related protein 5A
GO:0016998~cell wall macromolecule catabolic process	31	Eucgr.I02267	188.968	132.994	132.652	0.170321	0.056191	0	58.7434	121.055	92.4232	0.137702	0	0.140059	-10.6567	1.97e-57	DOWN	-9.70897	1.99e-52	DOWN	LOC104419594	26 kDa endochitinase 2
GO:0016998~cell wall macromolecule catabolic process	31	Eucgr.I02242	0	0	0	0	0	0	72.4005	90.2669	101.548	0.157278	0	0.797182	0	1	NC	-7.74372	4.92e-42	DOWN	LOC104419589	26 kDa endochitinase 2
GO:0016998~cell wall macromolecule catabolic process	31	Eucgr.I02246	0	0.258757	0.337808	0	0	0	5.67998	11.326	10.0137	0	0	0	0	1	NC	-8.21889	6.9e-16	DOWN	LOC104419591	26 kDa endochitinase 2
GO:0016998~cell wall macromolecule catabolic process	31	Eucgr.I02271	1643.13	1247.9	1199.72	1.49528	1.59531	0.900521	782.172	1508.54	1198.53	0.793947	1.68365	1.21557	-10.078	2.8e-67	DOWN	-9.87287	7.75e-66	DOWN	LOC104419595	endochitinase
GO:0016998~cell wall macromolecule catabolic process	31	Eucgr.A00020	878.461	493.348	834.395	249.873	177.138	165.96	741.997	732.801	720.651	113.645	120.453	119.761	-1.54188	0.000164763	DOWN	-2.41205	6.05e-09	DOWN	LOC104443583	endochitinase EP3
GO:0016998~cell wall macromolecule catabolic process	31	Eucgr.I01495	616.622	383.384	557.943	1627.18	1462.4	2372.83	321.377	312.454	299.551	691.176	673.155	685.108	2.24827	4.48e-08	UP	1.40286	0.000690142	UP	LOC104419011	endochitinase
GO:0016998~cell wall macromolecule catabolic process	31	Eucgr.L00937	25.4524	25.355	1.42511	14.7457	14.2739	23.8538	161.709	313.107	196.771	85.5118	80.6242	79.2462	0.506177	0.256615	NC	-1.22368	0.00327782	DOWN	LOC104429009	basic endochitinase
GO:0016998~cell wall macromolecule catabolic process	31	Eucgr.L00938	3.33958	2.73623	0.284809	1.77139	2.551	2.48559	8.26394	13.2152	8.66562	4.15488	4.47755	4.11571	0.615902	0.250608	NC	-1.24878	0.00555161	DOWN	LOC104429010	basic endochitinase
GO:0016998~cell wall macromolecule catabolic process	31	Eucgr.A01661	6.96916	11.5421	8.91215	1.8729	1.2216	1.02073	7.9224	14.2251	7.58621	2.99367	2.46312	2.62518	-2.56523	8.63e-09	DOWN	-1.6905	8.45e-05	DOWN	LOC104439389	probable xyloglucan endotransglucosylase/hydrolase protein 32
GO:0016998~cell wall macromolecule catabolic process	31	Eucgr.J02518	50.5606	30.903	14.6206	138.913	116.741	164.284	315.797	276.624	299.624	145.389	140.377	161.66	2.50746	1.73e-09	UP	-0.684391	0.112441	NC	LOC104422823	basic endochitinase
GO:0016998~cell wall macromolecule catabolic process	31	Eucgr.H04034	0.091111	0	0.875957	20.9012	15.7768	4.1674	4.80385	46.7832	11.0544	12.1184	11.1796	10.1756	5.77656	3.65e-27	UP	-0.692367	0.113423	NC	LOC104415224	chitinase-like protein 2
GO:0016998~cell wall macromolecule catabolic process	31	Eucgr.H00321	13.9614	7.99075	17.0002	39.9177	27.3854	35.0393	62.7916	54.2655	61.969	17.8239	16.0469	17.7358	1.70997	4.11e-05	UP	-1.46065	0.00045843	DOWN	LOC104456214	endochitinase EP3
GO:0016998~cell wall macromolecule catabolic process	31	Eucgr.H00326	26.9967	11.6106	20.8913	112.221	85.2394	125.007	57.2161	60.9254	61.5855	34.6823	32.6092	35.1297	2.79488	2.98e-11	UP	-0.570592	0.195446	NC	LOC104456220	endochitinase EP3
GO:0016998~cell wall macromolecule catabolic process	31	Eucgr.H00325	9.34274	4.00087	9.99365	25.2453	15.9642	21.6442	34.9815	31.2433	35.6163	13.3519	10.2893	12.1504	1.73243	3.97e-05	UP	-1.56925	0.000198307	DOWN
GO:0042545~cell wall modification	43	Eucgr.C00760	6.84772	3.34477	3.79325	0	0	0	1.53637	2.01656	1.53692	0	0	0.045633	-7.42288	1.21e-21	DOWN	-6.39563	3.04e-15	DOWN	LOC104436378	pectinesterase
GO:0042545~cell wall modification	43	Eucgr.A00084	205.811	302.203	238.719	67.8394	58.0744	42.6697	173.339	153.867	176.579	120.78	128.709	122.959	-1.80328	1.09e-05	DOWN	-0.197177	0.679851	NC	LOC104433838	40S ribosomal protein S15a-1
GO:0042545~cell wall modification	43	Eucgr.K03328	130.804	160.011	133.859	63.22	55.8351	30.9693	82.7771	87.1291	79.7262	54.3777	58.8488	61.8074	-1.24628	0.0024772	DOWN	-0.334376	0.462625	NC	LOC104426636	ETO1-like protein 1
GO:0042545~cell wall modification	43	Eucgr.K03328	130.804	160.011	133.859	63.22	55.8351	30.9693	82.7771	87.1291	79.7262	54.3777	58.8488	61.8074	-1.24628	0.0024772	DOWN	-0.334376	0.462625	NC	LOC104426636	ETO1-like protein 1
GO:0042545~cell wall modification	43	Eucgr.K03328	130.804	160.011	133.859	63.22	55.8351	30.9693	82.7771	87.1291	79.7262	54.3777	58.8488	61.8074	-1.24628	0.0024772	DOWN	-0.334376	0.462625	NC	LOC104426636	ETO1-like protein 1
GO:0042545~cell wall modification	43	Eucgr.H00909	9.90962	14.228	11.1176	0	0	0	9.98474	12.0802	12.4424	0.067248	0.061415	0.178717	-10.5028	8.51e-30	DOWN	-6.91381	3.93e-29	DOWN	LOC104456622	probable pectinesterase 53
GO:0042545~cell wall modification	43	Eucgr.H00909	9.90962	14.228	11.1176	0	0	0	9.98474	12.0802	12.4424	0.067248	0.061415	0.178717	-10.5028	8.51e-30	DOWN	-6.91381	3.93e-29	DOWN	LOC104456622	probable pectinesterase 53
GO:0042545~cell wall modification	43	Eucgr.E01463	0.107682	0	0.342406	18.4931	19.8587	76.648	1.3641	1.20911	2.09742	23.1272	24.207	24.5594	8.83024	1.67e-49	UP	4.35631	2.22e-21	UP	LOC104444380	pectinesterase 2
GO:0042545~cell wall modification	43	Eucgr.E00425	0	0	0	5.31604	4.24509	2.78557	0.358707	0.277566	0.706937	13.425	12.9102	12.3998	9.36175	2.76e-23	UP	5.51135	6.58e-26	UP	LOC104443687	probable pectinesterase 68
GO:0042545~cell wall modification	43	Eucgr.H04905	0	0	0	2.60551	1.83703	0	0	0.33961	0.450712	1.11648	1.10098	1.82595	7.91203	1.62e-13	UP	3.14571	2.34e-07	UP	LOC104415856	probable pectinesterase 8
GO:0042545~cell wall modification	43	Eucgr.H04944	3.90923	4.50873	3.22758	10.7802	7.00629	6.58931	2.27601	2.42133	1.98472	9.39097	9.82533	11.4739	1.48714	0.000456509	UP	2.64706	9.96e-10	UP	LOC104415878	probable pectinesterase/pectinesterase inhibitor 51
GO:0042545~cell wall modification	43	Eucgr.C00175	1238.52	1403.61	1188.63	2100.56	2446.55	1956.66	1495.01	1645.01	1372.5	5466.24	5397.84	5482.81	1.15622	0.00507385	UP	2.10872	3.16e-07	UP	LOC104435963	probable xyloglucan endotransglucosylase/hydrolase protein 23
GO:0042545~cell wall modification	43	Eucgr.G01685	0	0	0.433064	0.339956	0.769561	0.25217	1.42597	1.04718	0.485108	1.70531	1.7318	2.03231	0	1	NC	1.11429	0.0247021	UP	LOC104453340	putative pectinesterase 11
GO:0042545~cell wall modification	43	Eucgr.G02070	25.0206	25.9598	25.4694	38.8093	32.8605	24.5477	17.5679	18.969	17.9996	36.6666	35.5373	35.1981	0.695021	0.105442	NC	1.27622	0.00225513	UP	LOC104453630	pectinesterase 31
GO:0042545~cell wall modification	43	Eucgr.G01772	0.473694	0.513206	0.537328	34.3053	28.5903	7.37055	0.408549	0.327912	0.298468	41.8257	42.1838	38.9891	6.28347	7.34e-34	UP	7.67744	1.71e-43	UP	LOC104453420	thaumatin-like protein 1b
GO:0042545~cell wall modification	43	Eucgr.C03721	0.429279	0.509415	1.2412	1.34665	0.336518	0.256419	0.101918	0.099623	0	1.88309	1.27949	1.40801	0	1	NC	4.73602	1.35e-10	UP
GO:0042546~cell wall biogenesis	69	Eucgr.H02634	1988.86	2158.28	2010.53	1176.53	1232.34	704.023	1338.04	1434.65	1195.63	2707.9	2663.95	2759.84	-0.598576	0.163667	NC	1.28393	0.0019471	UP	LOC104414247	xyloglucan endotransglucosylase/hydrolase 2
GO:0042546~cell wall biogenesis	69	Eucgr.F03619	5.35432	5.27633	3.52214	2.62974	1.80154	0.79821	12.4448	24.5241	18.6901	3.29205	3.57657	4.31168	-1.16828	0.00847888	DOWN	-2.10739	5.62e-07	DOWN	LOC104450362	galactan beta-1,4-galactosyltransferase GALS1
GO:0042546~cell wall biogenesis	69	Eucgr.A01558	3.65811	17.4358	7.57248	0.598201	0.401723	0.089005	12.26	50.729	31.2928	0.310701	0.337516	0.733657	-4.55497	2.25e-21	DOWN	-6.43319	6.28e-37	DOWN	LOC104438577	glucomannan 4-beta-mannosyltransferase 9
GO:0042546~cell wall biogenesis	69	Eucgr.A01558	3.65811	17.4358	7.57248	0.598201	0.401723	0.089005	12.26	50.729	31.2928	0.310701	0.337516	0.733657	-4.55497	2.25e-21	DOWN	-6.43319	6.28e-37	DOWN	LOC104438577	glucomannan 4-beta-mannosyltransferase 9
GO:0042546~cell wall biogenesis	69	Eucgr.A01558	3.65811	17.4358	7.57248	0.598201	0.401723	0.089005	12.26	50.729	31.2928	0.310701	0.337516	0.733657	-4.55497	2.25e-21	DOWN	-6.43319	6.28e-37	DOWN	LOC104438577	glucomannan 4-beta-mannosyltransferase 9
GO:0042546~cell wall biogenesis	69	Eucgr.B02660	113.944	61.3673	98.8871	121.593	136.867	126.131	68.5875	75.4429	65.9917	199.714	209.331	206.561	0.880119	0.0357676	NC	1.81971	1.01e-05	UP	LOC104433015	probable xyloglucan endotransglucosylase/hydrolase protein 28
GO:0042546~cell wall biogenesis	69	Eucgr.A01968	686.544	749.591	621.261	225.715	242.881	237.803	822.521	857.162	832.018	433.593	436.371	437.043	-1.16887	0.00461635	DOWN	-0.714512	0.0958144	NC	LOC104441748	probable xyloglucan endotransglucosylase/hydrolase protein 16
GO:0042546~cell wall biogenesis	69	Eucgr.C00180	420.935	602.071	465.32	71.3431	108.639	114.801	469.253	584.557	579.91	536.711	513.447	538.688	-1.91909	2.84e-06	DOWN	0.24623	0.597432	NC	LOC104435967	probable xyloglucan endotransglucosylase/hydrolase protein 23
GO:0042546~cell wall biogenesis	69	Eucgr.C00178	221.655	304.855	220.775	100.063	116.039	130.696	161.661	157.754	174.373	218.875	235.586	214.402	-0.210074	0.654817	NC	1.15427	0.00567213	UP	LOC104435971	probable xyloglucan endotransglucosylase/hydrolase protein 23
GO:0042546~cell wall biogenesis	69	Eucgr.C00180	420.935	602.071	465.32	71.3431	108.639	114.801	469.253	584.557	579.91	536.711	513.447	538.688	-1.91909	2.84e-06	DOWN	0.24623	0.597432	NC	LOC104435967	probable xyloglucan endotransglucosylase/hydrolase protein 23
GO:0042546~cell wall biogenesis	69	Eucgr.C00181	176.367	230.632	177.316	32.5309	41.4455	51.1221	217.278	234.61	224.877	158.735	162.932	162.021	-1.52731	0.000306903	DOWN	-0.731648	0.0912097	NC	LOC104435972	probable xyloglucan endotransglucosylase/hydrolase protein 23
GO:0042546~cell wall biogenesis	69	Eucgr.B02529	0.423241	0.661306	1.17707	4.09035	5.17436	3.76346	0.771566	2.75388	1.06579	4.95585	4.50169	4.65854	3.1525	8.54e-12	UP	2.31869	1.08e-07	UP	LOC104432899	hypothetical protein
GO:0042546~cell wall biogenesis	69	Eucgr.B02529	0.423241	0.661306	1.17707	4.09035	5.17436	3.76346	0.771566	2.75388	1.06579	4.95585	4.50169	4.65854	3.1525	8.54e-12	UP	2.31869	1.08e-07	UP	LOC104432899	hypothetical protein
GO:0042546~cell wall biogenesis	69	Eucgr.H03540	0.362298	0.116331	0.789297	23.0475	17.8547	3.83238	0.890876	6.16768	2.90862	14.0166	15.5456	15.954	5.70147	3.93e-26	UP	2.57586	3.66e-09	UP	LOC104414857	mavicyanin
GO:0042546~cell wall biogenesis	69	Eucgr.B03348	14.8974	20.0886	13.6863	1.40293	1.54082	0.36886	1.51987	3.36637	4.93259	2.02265	2.05792	2.03728	-3.15347	2.61e-12	DOWN	-0.0283071	0.974435	NC	LOC104433548	probable xyloglucan endotransglucosylase/hydrolase protein 33
GO:0042546~cell wall biogenesis	69	Eucgr.B01596	5174.78	3194.01	4346.58	264.161	254.561	492.794	3567.43	3570.47	3564.66	407.022	388.336	401.616	-3.25902	1.38e-14	DOWN	-2.92683	3.28e-12	DOWN	LOC104428524	probable xyloglucan endotransglucosylase/hydrolase protein 23
GO:0042546~cell wall biogenesis	69	Eucgr.D01294	41.5511	59.7814	46.6147	11.0651	13.1669	8.51502	35.5954	30.7884	39.3349	39.0959	43.7187	41.7856	-1.8402	9.34e-06	DOWN	0.50016	0.260317	NC	LOC104441382	probable xyloglucan endotransglucosylase/hydrolase protein 8
GO:0042546~cell wall biogenesis	69	Eucgr.J01663	14.1524	26.6154	28.4392	4.7361	9.13276	4.48278	66.1685	86.1488	67.5013	44.4846	46.9985	49.027	-1.63139	0.000104818	DOWN	-0.40709	0.365259	NC	LOC104422221	probable xyloglucan endotransglucosylase/hydrolase protein B
GO:0042546~cell wall biogenesis	69	Eucgr.K02957	1.13622	0.53449	1.23237	0	0	0	0.642448	0.536302	0.236967	0	0	0	-4.79395	3.19e-07	DOWN	0	1	NC	LOC104427839	protein trichome birefringence-like 34
GO:0042546~cell wall biogenesis	69	Eucgr.K02957	1.13622	0.53449	1.23237	0	0	0	0.642448	0.536302	0.236967	0	0	0	-4.79395	3.19e-07	DOWN	0	1	NC	LOC104427839	protein trichome birefringence-like 34
GO:0042546~cell wall biogenesis	69	Eucgr.E00084	37.52	30.9427	37.3359	8.10622	8.14062	7.68938	14.6701	15.6996	14.5467	7.42263	6.33171	6.08175	-1.83005	1.06e-05	DOWN	-0.905105	0.0364566	NC	LOC104443393	UDP-D-xylose:L-fucose alpha-1,3-D-xylosyltransferase MGP4
GO:0042546~cell wall biogenesis	69	Eucgr.K01061	0	0	0.056162	1.55316	0.684508	0	0.469027	0.752801	0.152749	2.11618	1.78385	2.44549	4.09647	4.29e-07	UP	2.87835	3.67e-08	UP	LOC104424951	NAC domain-containing protein 73
GO:0042546~cell wall biogenesis	69	Eucgr.J00383	10.998	15.2429	15.6397	7.3205	4.47771	4.92321	3.21554	2.83765	2.4513	8.38839	8.271	7.80459	-1.04139	0.016424	DOWN	1.81128	3.46e-05	UP	LOC104421223	xyloglucan endotransglucosylase/hydrolase protein 31
GO:0042546~cell wall biogenesis	69	Eucgr.B03937	0.86649	2.04982	1.47938	0.284751	0.114096	0	0.52408	0.862923	0.479621	0	0	0.120514	-3.02439	4.22e-06	DOWN	0	1	NC	LOC104434058	xyloglucan endotransglucosylase/hydrolase protein 31
GO:0042546~cell wall biogenesis	69	Eucgr.H00619	1.226	1.26535	2.15197	0.281708	0	0.117737	0	1.02974	0.941673	1.00712	1.00772	0.695876	-2.30609	0.000259868	DOWN	0	1	NC	LOC104456417	xyloglucan endotransglucosylase/hydrolase protein 9
GO:0042546~cell wall biogenesis	69	Eucgr.H00619	1.226	1.26535	2.15197	0.281708	0	0.117737	0	1.02974	0.941673	1.00712	1.00772	0.695876	-2.30609	0.000259868	DOWN	0	1	NC	LOC104456417	xyloglucan endotransglucosylase/hydrolase protein 9
GO:0042546~cell wall biogenesis	69	Eucgr.C02203	1.40524	1.2259	1.47024	0	0.188054	0	2.80651	2.8578	8.02682	1.28492	0.959875	0.608052	0	1	NC	-2.31614	3.17e-06	DOWN	LOC104437322	probable xyloglucan endotransglucosylase/hydrolase protein 23
GO:0042546~cell wall biogenesis	69	Eucgr.A01661	6.96916	11.5421	8.91215	1.8729	1.2216	1.02073	7.9224	14.2251	7.58621	2.99367	2.46312	2.62518	-2.56523	8.63e-09	DOWN	-1.6905	8.45e-05	DOWN	LOC104439389	probable xyloglucan endotransglucosylase/hydrolase protein 32
GO:0042546~cell wall biogenesis	69	Eucgr.I00659	71.0425	83.5782	93.0166	0	0	0	28.7559	37.0731	32.3649	0	0.22352	0.193521	-11.1902	2.58e-52	DOWN	-8.58526	4.21e-41	DOWN	LOC104418410	probable xyloglucan endotransglucosylase/hydrolase protein 6
GO:0042546~cell wall biogenesis	69	Eucgr.G01174	0.28841	0.735411	0.697487	5.34669	3.43206	1.91291	0.677263	1.45414	1.00872	1.64601	1.1544	1.9359	3.36932	1.95e-10	UP	0.931489	0.0851827	NC	LOC104453046	probable xyloglucan endotransglucosylase/hydrolase protein 10
GO:0042546~cell wall biogenesis	69	Eucgr.D02155	60.2123	55.4883	61.0862	56.0043	51.2067	31.1336	21.9156	24.0691	21.2421	88.0357	88.9267	84.9807	-0.000305239	1	NC	2.2356	6.73e-08	UP	LOC104441984	probable methyltransferase PMT14
GO:0042546~cell wall biogenesis	69	Eucgr.D02155	60.2123	55.4883	61.0862	56.0043	51.2067	31.1336	21.9156	24.0691	21.2421	88.0357	88.9267	84.9807	-0.000305239	1	NC	2.2356	6.73e-08	UP	LOC104441984	probable methyltransferase PMT14
GO:0042546~cell wall biogenesis	69	Eucgr.C00175	1238.52	1403.61	1188.63	2100.56	2446.55	1956.66	1495.01	1645.01	1372.5	5466.24	5397.84	5482.81	1.15622	0.00507385	UP	2.10872	3.16e-07	UP	LOC104435963	probable xyloglucan endotransglucosylase/hydrolase protein 23
GO:0042546~cell wall biogenesis	69	Eucgr.C00176	333.927	399.746	327.547	1160.89	1108.13	877.224	447.155	418.222	383.788	1130.86	1203.31	1143	1.93955	2.14e-06	UP	1.74131	2.35e-05	UP	LOC104435966	probable xyloglucan endotransglucosylase/hydrolase protein 23
GO:0042546~cell wall biogenesis	69	Eucgr.C00182	16.0813	22.5012	17.1744	25.9565	32.6504	29.4648	41.0673	35.8028	46.0237	92.7342	89.9825	94.9808	1.44069	0.000510503	UP	1.42995	0.00055875	UP	LOC104435973	probable xyloglucan endotransglucosylase/hydrolase protein 23
GO:0042546~cell wall biogenesis	69	Eucgr.C00184	24.9324	27.8444	25.3825	92.5989	124.77	98.6896	62.6658	45.1118	57.0428	415.799	412.753	416.546	2.46999	2.59e-09	UP	3.21373	3.75e-14	UP	LOC104435976	probable xyloglucan endotransglucosylase/hydrolase protein 23
GO:0042546~cell wall biogenesis	69	Eucgr.G02075	6.9734	3.97647	4.82242	9.95196	9.55631	4.75002	3.04077	3.12772	2.16023	11.3967	10.3758	10.2396	1.09057	0.0116094	UP	2.38729	3.34e-08	UP	LOC104453636	probable xyloglucan endotransglucosylase/hydrolase protein 28
GO:0042546~cell wall biogenesis	69	Eucgr.D02229	71.9981	69.3335	69.5883	295.166	322.131	313.776	113.611	113.758	103.065	212.396	212.579	215.92	2.63524	2.22e-10	UP	1.27034	0.0022124	UP	LOC104442050	probable xyloglucan endotransglucosylase/hydrolase protein 30
GO:0042546~cell wall biogenesis	69	Eucgr.B03624	0	0	0.068073	2.19548	2.07351	1.49533	0.219172	0.133525	0	3.73575	2.65632	5.044	5.81835	2.06e-14	UP	6.18794	8.03e-20	UP	LOC104433791	protein YLS3
GO:0042546~cell wall biogenesis	69	Eucgr.A01966	50.6942	58.924	47.5871	386.734	323.115	414.034	61.5645	68.1807	86.5197	453.315	453.043	462.53	3.29176	8.63e-15	UP	2.95294	2.31e-12	UP	LOC104441732	xyloglucan endotransglucosylase/hydrolase 2
GO:0042546~cell wall biogenesis	69	Eucgr.K00883	60.7116	95.491	48.9897	416.46	282.474	132.32	160.752	163.15	171.275	532.347	582.364	556.351	2.37816	8.22e-09	UP	1.97108	1.73e-06	UP	LOC104424824	xyloglucan endotransglucosylase/hydrolase protein 9
GO:0042546~cell wall biogenesis	69	Eucgr.K00883	60.7116	95.491	48.9897	416.46	282.474	132.32	160.752	163.15	171.275	532.347	582.364	556.351	2.37816	8.22e-09	UP	1.97108	1.73e-06	UP	LOC104424824	xyloglucan endotransglucosylase/hydrolase protein 9
GO:0042546~cell wall biogenesis	69	Eucgr.C00177	346.973	439.934	365.489	631.098	639.716	529.337	549.939	537.651	515.894	865.853	815.162	919.316	1.46943	0.00033181	UP	1.39826	0.000716132	UP
GO:0044036~cell wall macromolecule metabolic process	16	Eucgr.C03886	1.11126	0.292052	3.85959	115.006	128.039	55.9452	0.57598	1.17576	0.686627	72.6065	76.6436	73.4406	6.50527	3.99e-38	UP	7.11411	2.14e-41	UP	LOC104438309	1-aminocyclopropane-1-carboxylate oxidase 1
GO:0044036~cell wall macromolecule metabolic process	16	Eucgr.K02271	0.859478	3.95176	1.27796	114.635	77.4111	48.254	2.97739	4.95513	3.45993	58.5406	58.5939	62.4395	5.82634	8.2e-34	UP	4.30373	7.09e-22	UP	LOC104425836	auxin efflux carrier component 1
GO:0044036~cell wall macromolecule metabolic process	16	Eucgr.F02615	0.787708	4.69926	1.66143	9.11829	11.0842	4.03537	2.20152	3.5228	2.35854	4.36899	3.62544	4.84071	2.09133	1.28e-06	UP	0.985995	0.0292687	NC	LOC104449523	NAC domain-containing protein 30
GO:0044036~cell wall macromolecule metabolic process	16	Eucgr.B00724	1.24217	0.426127	0.095105	1.29479	1.63653	1.40148	2.07202	1.8741	1.98449	2.93269	2.06105	2.47952	1.50482	0.00519953	UP	0.726913	0.13289	NC	LOC104421675	NAC domain-containing protein 92
GO:0044036~cell wall macromolecule metabolic process	16	Eucgr.I01926	91.2337	100.393	91.5117	245.343	245.789	204.688	180.826	138.998	104.536	145.787	141.567	141.22	1.7471	1.95e-05	UP	0.291383	0.527564	NC	LOC104419350	plant cysteine oxidase 2
GO:0044036~cell wall macromolecule metabolic process	16	Eucgr.I01926	91.2337	100.393	91.5117	245.343	245.789	204.688	180.826	138.998	104.536	145.787	141.567	141.22	1.7471	1.95e-05	UP	0.291383	0.527564	NC	LOC104419350	plant cysteine oxidase 2
GO:0044036~cell wall macromolecule metabolic process	16	Eucgr.C00839	3.2132	4.42502	4.75849	31.7443	23.1196	16.2307	23.1975	14.4034	12.4488	14.4744	15.9102	16.1424	3.01626	1.82e-12	UP	0.08167	0.873342	NC	LOC104436437	protein Brevis radix-like 4
GO:0044036~cell wall macromolecule metabolic process	16	Eucgr.F00242	0.20919	0.50929	0.622866	1.82601	2.39877	0.547848	2.06595	2.60909	1.58066	1.16424	0.990718	1.3004	2.10777	7.24e-05	UP	-0.737836	0.145373	NC	LOC104447909	uncharacterized LOC104447909
GO:0044036~cell wall macromolecule metabolic process	16	Eucgr.J00985	0.792466	0.185376	0.386143	5.29435	4.15908	0.719015	0.95119	2.53135	1.47383	5.64857	3.84181	5.28991	3.36494	9.21e-12	UP	1.9099	1.43e-05	UP	LOC104421714	protein trichome birefringence-like 36
GO:0044036~cell wall macromolecule metabolic process	16	Eucgr.F02743	114.812	60.0316	131.226	422.51	414.318	264.666	474.338	278.956	230.861	632.903	639.847	623.554	2.32465	1.67e-08	UP	1.24079	0.00279656	UP	LOC104449632	stearoyl-[acyl-carrier-protein] 9-desaturase 6, chloroplastic
GO:0052325~cell wall pectin biosynthetic process	4	Eucgr.H03354	2.41264	0.98464	2.20975	1.06352	2.30335	1.78576	2.48306	5.2211	3.87894	7.74287	9.5908	8.8643	0.309719	0.560007	NC	1.4783	0.000523585	UP	LOC104414715	omega-hydroxypalmitate O-feruloyl transferase
GO:0052325~cell wall pectin biosynthetic process	4	Eucgr.H03354	2.41264	0.98464	2.20975	1.06352	2.30335	1.78576	2.48306	5.2211	3.87894	7.74287	9.5908	8.8643	0.309719	0.560007	NC	1.4783	0.000523585	UP	LOC104414715	omega-hydroxypalmitate O-feruloyl transferase
GO:0052541~plant-type cell wall cellulose metabolic process	6	Eucgr.D01627	33.4711	66.6326	43.6271	15.4012	15.151	4.7018	18.4579	18.5036	16.9593	21.9455	22.9723	20.7654	-1.72062	2.95e-05	DOWN	0.547536	0.215574	NC	LOC104441580	patellin-4
GO:0052541~plant-type cell wall cellulose metabolic process	6	Eucgr.D02037	99.6307	104.895	81.086	26.2317	17.6408	23.1868	67.3376	94.2054	97.963	30.0024	27.1096	26.7311	-1.76586	1.68e-05	DOWN	-1.37554	0.000908864	DOWN	LOC104441891	protein NRT1/ PTR FAMILY 6.3
GO:0052543~callose deposition in cell wall	9	Eucgr.B03285	3.88742	1.47112	1.01511	0	0	0.08023	0.429453	0.26578	0.076205	0	0	0	-4.66884	3.48e-12	DOWN	0	1	NC	LOC104435620	inorganic phosphate transporter 2-1, chloroplastic
GO:0052543~callose deposition in cell wall	9	Eucgr.K01029	16.7164	19.1749	20.8504	4.67918	5.43878	3.37439	14.5585	11.4916	14.1765	1.23019	1.24531	1.45894	-1.6682	6.04e-05	DOWN	-3.0696	1.86e-12	DOWN	LOC104424920	two pore calcium channel protein 1
GO:0052543~callose deposition in cell wall	9	Eucgr.K01029	16.7164	19.1749	20.8504	4.67918	5.43878	3.37439	14.5585	11.4916	14.1765	1.23019	1.24531	1.45894	-1.6682	6.04e-05	DOWN	-3.0696	1.86e-12	DOWN	LOC104424920	two pore calcium channel protein 1
GO:0052543~callose deposition in cell wall	9	Eucgr.K01031	34.0895	31.7528	36.0968	1.49051	1.73309	1.41929	23.9469	20.086	25.0454	1.36982	1.48795	1.40299	-3.95674	7.25e-19	DOWN	-3.64403	1.54e-16	DOWN	LOC104424918	two pore calcium channel protein 1A
GO:0052543~callose deposition in cell wall	9	Eucgr.K01031	34.0895	31.7528	36.0968	1.49051	1.73309	1.41929	23.9469	20.086	25.0454	1.36982	1.48795	1.40299	-3.95674	7.25e-19	DOWN	-3.64403	1.54e-16	DOWN	LOC104424918	two pore calcium channel protein 1A
GO:0052543~callose deposition in cell wall	9	Eucgr.D00621	4.35965	1.42087	3.9603	11.6023	8.98448	8.83302	2.33062	2.78322	2.15614	5.39253	5.52815	5.88348	2.1214	3.2e-07	UP	1.58966	0.000151254	UP
GO:0052544~defense response by callose deposition in cell wall	5	Eucgr.D01848	101.598	184.24	129.059	26.8544	24.426	18.9238	94.8239	71.174	82.3284	35.8045	38.4181	41.9575	-2.24638	5.04e-08	DOWN	-0.924851	0.0287124	NC	LOC104441749	glutamate--cysteine ligase, chloroplastic
GO:0052544~defense response by callose deposition in cell wall	5	Eucgr.D01848	101.598	184.24	129.059	26.8544	24.426	18.9238	94.8239	71.174	82.3284	35.8045	38.4181	41.9575	-2.24638	5.04e-08	DOWN	-0.924851	0.0287124	NC	LOC104441749	glutamate--cysteine ligase, chloroplastic
GO:0052544~defense response by callose deposition in cell wall	5	Eucgr.D01848	101.598	184.24	129.059	26.8544	24.426	18.9238	94.8239	71.174	82.3284	35.8045	38.4181	41.9575	-2.24638	5.04e-08	DOWN	-0.924851	0.0287124	NC	LOC104441749	glutamate--cysteine ligase, chloroplastic
GO:0052546~cell wall pectin metabolic process	8	Eucgr.D01627	33.4711	66.6326	43.6271	15.4012	15.151	4.7018	18.4579	18.5036	16.9593	21.9455	22.9723	20.7654	-1.72062	2.95e-05	DOWN	0.547536	0.215574	NC	LOC104441580	patellin-4
GO:0052546~cell wall pectin metabolic process	8	Eucgr.D02247	12.2773	15.3389	13.8176	6.9183	5.17527	4.40694	5.00277	4.77665	3.6738	5.5766	5.37036	4.63964	-1.06162	0.0124185	DOWN	0.491636	0.28673	NC	LOC104442066	probable methyltransferase PMT13
GO:0052546~cell wall pectin metabolic process	8	Eucgr.E00210	120.355	114.647	120.521	44.9974	38.8308	37.5683	48.9209	54.1557	51.288	31.7585	27.2668	28.8288	-1.20008	0.00365957	DOWN	-0.578839	0.185629	NC	LOC104443487	probable methyltransferase PMT13
GO:0052546~cell wall pectin metabolic process	8	Eucgr.D02037	99.6307	104.895	81.086	26.2317	17.6408	23.1868	67.3376	94.2054	97.963	30.0024	27.1096	26.7311	-1.76586	1.68e-05	DOWN	-1.37554	0.000908864	DOWN	LOC104441891	protein NRT1/ PTR FAMILY 6.3
GO:0071433~cell wall repair	2	Eucgr.C00555	10.8575	6.41241	6.32407	13.4647	8.06374	9.6962	6.15873	7.47772	6.76084	18.7523	16.9535	18.7666	0.736723	0.113918	NC	1.5801	0.000320711	UP	LOC104436223	uncharacterized LOC104436223
GO:0071433~cell wall repair	2	Eucgr.C00601	16.1655	12.7993	12.7304	25.4793	21.2024	16.8591	2.96821	2.8447	2.62072	9.57872	10.595	8.16576	0.863396	0.0505985	NC	1.74419	0.000555761	UP	LOC104436255	uncharacterized LOC104436255
GO:0071554~cell wall organization or biogenesis	52	Eucgr.K03547	1.82414	3.19319	2.74423	3.32261	3.37447	1.10227	1.01572	1.14088	0.985211	4.46521	4.00361	4.10862	0.435423	0.379329	NC	2.42194	1.15e-07	UP	LOC104426823	protein trichome birefringence-like 6
GO:0071554~cell wall organization or biogenesis	52	Eucgr.E01053	8.1723	47.5197	14.6851	0.220024	0	0.540984	13.9013	41.8115	42.6308	0.749316	0.760833	0.578779	-6.75069	6.52e-33	DOWN	-5.49264	6.04e-29	DOWN	LOC104444108	NAC domain-containing protein 43
GO:0071554~cell wall organization or biogenesis	52	Eucgr.C00073	5.16216	6.09837	4.47462	3.18026	2.71271	3.16139	4.7995	5.64884	5.2112	2.61893	2.35644	1.80514	-0.461611	0.324976	NC	-1.07492	0.0155835	DOWN	LOC104435896	protein trichome birefringence-like 5
GO:0071554~cell wall organization or biogenesis	52	Eucgr.B03636	21.3254	17.7651	15.4597	2.09018	1.03852	1.08444	5.51469	7.58323	6.28155	4.39157	4.42249	4.43971	-3.62797	7.33e-16	DOWN	-0.295687	0.53731	NC	LOC104433800	protein trichome birefringence-like 1
GO:0071554~cell wall organization or biogenesis	52	Eucgr.B01121	18.2589	21.7179	19.7569	5.29095	3.87852	2.34275	4.97464	7.04953	5.25483	2.68427	3.75917	3.56879	-2.09951	5.56e-07	DOWN	-0.496529	0.277966	NC	LOC104424724	protein trichome birefringence-like 10
GO:0071554~cell wall organization or biogenesis	52	Eucgr.B01121	18.2589	21.7179	19.7569	5.29095	3.87852	2.34275	4.97464	7.04953	5.25483	2.68427	3.75917	3.56879	-2.09951	5.56e-07	DOWN	-0.496529	0.277966	NC	LOC104424724	protein trichome birefringence-like 10
GO:0071554~cell wall organization or biogenesis	52	Eucgr.D01711	47.8514	50.8662	46.1366	12.5004	11.4966	11.4085	29.4679	31.8894	32.8751	14.8801	16.3033	18.0232	-1.68773	4.23e-05	DOWN	-0.726234	0.0929006	NC	LOC104441639	protein trichome birefringence-like 23
GO:0071554~cell wall organization or biogenesis	52	Eucgr.F02864	40.9071	21.2738	43.83	6.87377	6.60506	7.34039	25.0181	38.9652	39.9558	6.58039	5.41948	5.70045	-2.05044	9.52e-07	DOWN	-2.37179	1.8e-08	DOWN	LOC104449723	protein ODORANT1
GO:0071554~cell wall organization or biogenesis	52	Eucgr.H04947	10.6007	14.1874	13.1002	1.08529	1.25597	1.69973	8.67308	5.73677	8.14321	2.09659	2.58946	1.66151	-3.13406	1.56e-12	DOWN	-1.65977	0.000104686	DOWN	LOC104415879	protein trichome berefringence-like 7
GO:0071554~cell wall organization or biogenesis	52	Eucgr.D01711	47.8514	50.8662	46.1366	12.5004	11.4966	11.4085	29.4679	31.8894	32.8751	14.8801	16.3033	18.0232	-1.68773	4.23e-05	DOWN	-0.726234	0.0929006	NC	LOC104441639	protein trichome birefringence-like 23
GO:0071554~cell wall organization or biogenesis	52	Eucgr.E00070	16.279	9.17031	13.7467	2.76438	2.65567	2.03884	2.36843	2.94467	2.47974	3.19074	3.9737	2.87787	-2.10158	9.75e-07	DOWN	0.615489	0.186653	NC	LOC104443378	protein trichome birefringence-like 25
GO:0071554~cell wall organization or biogenesis	52	Eucgr.J01893	255.274	305.852	260.874	122.161	102.299	51.8545	198.999	266.428	264.902	118.357	112.988	111.019	-1.22488	0.00296306	DOWN	-0.874084	0.0391868	NC	LOC104422374	protein trichome birefringence-like 45
GO:0071554~cell wall organization or biogenesis	52	Eucgr.I02565	11.9264	15.052	12.4935	3.82797	2.443	2.57784	4.68655	4.29432	5.02564	1.54546	1.96316	2.29407	-2.00596	2.89e-06	DOWN	-1.06909	0.0188765	DOWN	LOC104419837	protein trichome birefringence-like 12
GO:0071554~cell wall organization or biogenesis	52	Eucgr.I02565	11.9264	15.052	12.4935	3.82797	2.443	2.57784	4.68655	4.29432	5.02564	1.54546	1.96316	2.29407	-2.00596	2.89e-06	DOWN	-1.06909	0.0188765	DOWN	LOC104419837	protein trichome birefringence-like 12
GO:0071554~cell wall organization or biogenesis	52	Eucgr.I02109	34.2283	23.7809	24.2025	0	0	0	5.06689	11.127	7.68403	0	0	0	-11.8716	6.35e-41	DOWN	-8.33566	4.74e-29	DOWN	LOC104419483	protein trichome birefringence-like 19
GO:0071554~cell wall organization or biogenesis	52	Eucgr.I02119	75.5743	59.33	63.5139	1.07785	0.3814	0.144156	11.3141	17.317	11.6945	0	0.233657	0.115793	-6.93595	2.75e-40	DOWN	-7.06346	4.08e-34	DOWN	LOC104419488	protein trichome birefringence-like 19
GO:0071554~cell wall organization or biogenesis	52	Eucgr.L01011	21.945	20.104	22.8832	0.394397	0.275261	0	0.431913	1.11723	0.561849	0	0	0	-6.89939	3.74e-33	DOWN	-4.20206	5.04e-07	DOWN	LOC104429094	protein trichome birefringence-like 19
GO:0071554~cell wall organization or biogenesis	52	Eucgr.A00614	34.6789	55.1818	39.0548	9.20188	7.96695	6.37336	36.2018	32.8755	36.927	10.0705	9.29099	9.83635	-2.14919	2.54e-07	DOWN	-1.65869	6.89e-05	DOWN	LOC104426028	protein trichome birefringence-like 35
GO:0071554~cell wall organization or biogenesis	52	Eucgr.A00614	34.6789	55.1818	39.0548	9.20188	7.96695	6.37336	36.2018	32.8755	36.927	10.0705	9.29099	9.83635	-2.14919	2.54e-07	DOWN	-1.65869	6.89e-05	DOWN	LOC104426028	protein trichome birefringence-like 35
GO:0071554~cell wall organization or biogenesis	52	Eucgr.J00196	2.34468	1.51382	2.13935	14.5466	11.9814	5.59211	5.0866	8.98225	5.34188	7.38323	7.99459	6.88618	2.85353	4.76e-11	UP	0.474153	0.29839	NC	LOC104421065	protein ESKIMO 1
GO:0071554~cell wall organization or biogenesis	52	Eucgr.F03235	0	0.248564	0	1.30584	0.453811	0	0	0	0.19026	0.286695	0.086303	0.270808	2.63607	0.000586414	UP	0	1	NC	LOC104450069	protein trichome birefringence-like 38
GO:0071554~cell wall organization or biogenesis	52	Eucgr.K00144	78.1667	66.129	76.1883	10.9648	11.2677	12.5234	48.4475	51.8815	54.3219	9.83665	10.2676	9.46324	-2.35519	1.25e-08	DOWN	-2.1578	1.93e-07	DOWN	LOC104424330	protein YLS7
GO:0071554~cell wall organization or biogenesis	52	Eucgr.E02712	5.60186	4.79668	5.5847	6.23551	6.2189	4.62505	7.30627	6.34564	5.42491	9.38018	9.83882	9.84716	0.496852	0.287283	NC	1.14256	0.00800681	UP	LOC104444994	uncharacterized LOC104444994
GO:0071554~cell wall organization or biogenesis	52	Eucgr.F01363	0.299494	0.169952	0	0	0	0	9.34597	10.6294	10.3863	3.11193	3.02357	3.88549	0	1	NC	-1.4286	0.00110845	DOWN	LOC104448602	protein trichome birefringence-like 41
GO:0071554~cell wall organization or biogenesis	52	Eucgr.J01601	0.171589	0.211508	0.307903	1.72444	1.59522	0.422954	0.954662	1.13318	0.636837	3.94468	3.69322	2.99472	3.10475	7.65e-07	UP	2.6066	5.39e-08	UP	LOC104422165	protein ODORANT1
GO:0071554~cell wall organization or biogenesis	52	Eucgr.B02240	6.58836	6.9435	6.47619	19.2514	18.695	13.5069	10.9542	9.77813	8.62651	20.2111	21.0003	18.1468	1.90081	6.48e-06	UP	1.29559	0.00213302	UP	LOC104432635	protein PMR5
GO:0071554~cell wall organization or biogenesis	52	Eucgr.E01056	0	0	0	0	0	0	2.56792	2.30253	2.71968	4.59	4.78155	5.93608	0	1	NC	1.39174	0.00235041	UP
GO:0071554~cell wall organization or biogenesis	52	Eucgr.H03345	0	0	0	0	0	0	7.30997	7.4037	7.26857	14.0268	13.2259	13.3795	0	1	NC	1.34593	0.00210073	UP
GO:0071555~cell wall organization	264	Eucgr.H02634	1988.86	2158.28	2010.53	1176.53	1232.34	704.023	1338.04	1434.65	1195.63	2707.9	2663.95	2759.84	-0.598576	0.163667	NC	1.28393	0.0019471	UP	LOC104414247	xyloglucan endotransglucosylase/hydrolase 2
GO:0071555~cell wall organization	264	Eucgr.H04092	0.058447	0	0	0.808028	0.337469	0.28876	0.058145	0.289089	0.056745	2.195	2.49572	2.59677	0	1	NC	4.57231	5.72e-16	UP	LOC104415271	polygalacturonase At1g48100
GO:0071555~cell wall organization	264	Eucgr.H04092	0.058447	0	0	0.808028	0.337469	0.28876	0.058145	0.289089	0.056745	2.195	2.49572	2.59677	0	1	NC	4.57231	5.72e-16	UP	LOC104415271	polygalacturonase At1g48100
GO:0071555~cell wall organization	264	Eucgr.K02930	20.7929	12.8444	16.9956	71.9496	45.5524	37.1672	10.6732	10.0145	8.79334	24.2107	26.7837	25.3521	2.01943	8.58e-07	UP	1.67366	5.15e-05	UP	LOC104426339	ABC transporter B family member 1
GO:0071555~cell wall organization	264	Eucgr.I00330	11.7264	7.53713	9.79601	12.5167	10.1088	4.49364	6.67673	7.90518	6.3497	14.1025	14.2367	13.7627	0.243323	0.606175	NC	1.29939	0.00188401	UP	LOC104418204	probable inactive receptor kinase At5g10020
GO:0071555~cell wall organization	264	Eucgr.I01265	69.9238	76.7347	72.6482	56.8082	76.1901	61.3292	62.5978	68.6894	66.0703	107.857	112.598	113.154	0.190505	0.687254	NC	1.02224	0.0149085	UP	LOC104418831	cyclase-associated protein 1
GO:0071555~cell wall organization	264	Eucgr.F03758	9.55485	6.24558	10.3112	0.188309	0.149248	0	5.94184	12.4019	7.29831	0.242604	0.198037	0.340122	-6.25781	5.58e-26	DOWN	-5.34759	5.26e-24	DOWN	LOC104450480	auxin transporter-like protein 3
GO:0071555~cell wall organization	264	Eucgr.A00514	315.651	240.635	331.417	41.2225	31.4659	25.5026	100.777	210.209	190.559	23.9145	22.8891	25.8467	-2.8929	4.82e-12	DOWN	-2.63954	2.54e-10	DOWN	LOC104420700	auxin transporter-like protein 4
GO:0071555~cell wall organization	264	Eucgr.I01979	96.3681	93.0772	89.8148	36.1909	36.7663	36.6072	61.9113	68.735	71.2307	25.1576	25.2137	24.6638	-0.98569	0.0180655	NC	-1.2371	0.00295817	DOWN	LOC104419387	probable galacturonosyltransferase 14
GO:0071555~cell wall organization	264	Eucgr.A00514	315.651	240.635	331.417	41.2225	31.4659	25.5026	100.777	210.209	190.559	23.9145	22.8891	25.8467	-2.8929	4.82e-12	DOWN	-2.63954	2.54e-10	DOWN	LOC104420700	auxin transporter-like protein 4
GO:0071555~cell wall organization	264	Eucgr.A00514	315.651	240.635	331.417	41.2225	31.4659	25.5026	100.777	210.209	190.559	23.9145	22.8891	25.8467	-2.8929	4.82e-12	DOWN	-2.63954	2.54e-10	DOWN	LOC104420700	auxin transporter-like protein 4
GO:0071555~cell wall organization	264	Eucgr.C01769	16.069	10.1182	16.4794	35.9394	30.039	12.1983	7.58788	7.88901	5.5281	23.4045	22.8857	24.4719	1.24226	0.00266161	UP	2.05112	7.41e-07	UP	LOC104437051	cellulose synthase A catalytic subunit 1 [UDP-forming]
GO:0071555~cell wall organization	264	Eucgr.E00821	3.3107	7.60964	4.41669	0.48346	0.257384	0.331421	1.13071	1.8782	2.49962	0.163421	0.39941	0.252245	-4.01439	2.05e-15	DOWN	-2.7834	8.85e-08	DOWN	LOC104443952	cellulose synthase A catalytic subunit 4 [UDP-forming]
GO:0071555~cell wall organization	264	Eucgr.J00461	56.4499	66.94	60.7737	26.5296	26.7017	25.3402	42.3594	37.0347	37.9638	16.27	16.3109	15.4389	-0.844829	0.0448899	NC	-1.07571	0.0104683	DOWN	LOC104421284	peptidyl-prolyl cis-trans isomerase CYP71
GO:0071555~cell wall organization	264	Eucgr.E00821	3.3107	7.60964	4.41669	0.48346	0.257384	0.331421	1.13071	1.8782	2.49962	0.163421	0.39941	0.252245	-4.01439	2.05e-15	DOWN	-2.7834	8.85e-08	DOWN	LOC104443952	cellulose synthase A catalytic subunit 4 [UDP-forming]
GO:0071555~cell wall organization	264	Eucgr.K00782	37.6316	34.6572	33.8158	1.59866	0.622151	0.375061	45.2127	47.1764	49.8566	5.87861	5.96036	5.46919	-5.32999	5.84e-29	DOWN	-2.76378	4.72e-11	DOWN	LOC104424749	cellulose synthase-like protein B4
GO:0071555~cell wall organization	264	Eucgr.J00224	3.44048	2.55361	3.04571	0.272348	0.114983	0.07289	2.33107	2.31975	1.87599	0.057084	0	0	-4.0221	2.86e-12	DOWN	-5.85713	6.54e-16	DOWN	LOC104421095	cytochrome P450 90A1
GO:0071555~cell wall organization	264	Eucgr.J00224	3.44048	2.55361	3.04571	0.272348	0.114983	0.07289	2.33107	2.31975	1.87599	0.057084	0	0	-4.0221	2.86e-12	DOWN	-5.85713	6.54e-16	DOWN	LOC104421095	cytochrome P450 90A1
GO:0071555~cell wall organization	264	Eucgr.J00224	3.44048	2.55361	3.04571	0.272348	0.114983	0.07289	2.33107	2.31975	1.87599	0.057084	0	0	-4.0221	2.86e-12	DOWN	-5.85713	6.54e-16	DOWN	LOC104421095	cytochrome P450 90A1
GO:0071555~cell wall organization	264	Eucgr.J01279	0	0	0	0.193081	0.286634	0	1.42077	0.756541	0.665271	2.10742	1.35046	1.95831	0	1	NC	1.20731	0.015105	UP	LOC104421951	polygalacturonase
GO:0071555~cell wall organization	264	Eucgr.J01378	54.652	52.6642	57.0659	24.2156	23.8829	32.8303	62.3816	56.8164	63.641	18.2908	18.6356	17.5305	-0.607013	0.159308	NC	-1.50465	0.000276308	DOWN	LOC104422021	probable galacturonosyltransferase 14
GO:0071555~cell wall organization	264	Eucgr.D02228	0.438944	0.314998	0.562353	56.3612	41.5059	11.5938	1.47053	2.24416	1.42932	35.2617	37.6477	37.7187	7.23851	2.24e-43	UP	4.94196	1.1e-26	UP	LOC104442048	cellulose synthase-like protein D3
GO:0071555~cell wall organization	264	Eucgr.K03590	6.15397	6.84029	6.8251	13.1764	13.0672	6.19007	4.36031	4.64722	3.4035	10.9171	11.1216	10.4903	1.10582	0.00806432	UP	1.68833	5.04e-05	UP	LOC104426864	CLIP-associated protein
GO:0071555~cell wall organization	264	Eucgr.G03059	2.9037	1.70295	2.80713	69.4633	58.6294	56.755	1.8244	2.61159	1.97826	15.8941	16.5555	16.4423	5.14335	3.26e-28	UP	3.23261	1.53e-13	UP	LOC104454392	cytochrome P450 90A1
GO:0071555~cell wall organization	264	Eucgr.G03059	2.9037	1.70295	2.80713	69.4633	58.6294	56.755	1.8244	2.61159	1.97826	15.8941	16.5555	16.4423	5.14335	3.26e-28	UP	3.23261	1.53e-13	UP	LOC104454392	cytochrome P450 90A1
GO:0071555~cell wall organization	264	Eucgr.G03059	2.9037	1.70295	2.80713	69.4633	58.6294	56.755	1.8244	2.61159	1.97826	15.8941	16.5555	16.4423	5.14335	3.26e-28	UP	3.23261	1.53e-13	UP	LOC104454392	cytochrome P450 90A1
GO:0071555~cell wall organization	264	Eucgr.H03604	24.8957	27.4898	25.086	8.90129	6.78086	3.51579	9.03894	10.2615	6.92809	2.86846	2.60605	2.43373	-1.68544	4.17e-05	DOWN	-1.52732	0.000269743	DOWN	LOC104414903	mediator of RNA polymerase II transcription subunit 33A
GO:0071555~cell wall organization	264	Eucgr.B02660	113.944	61.3673	98.8871	121.593	136.867	126.131	68.5875	75.4429	65.9917	199.714	209.331	206.561	0.880119	0.0357676	NC	1.81971	1.01e-05	UP	LOC104433015	probable xyloglucan endotransglucosylase/hydrolase protein 28
GO:0071555~cell wall organization	264	Eucgr.B03312	2.70062	2.13308	2.73151	3.33481	3.18874	3.47262	4.09019	2.33464	3.64186	1.47998	1.97704	1.41787	0.787771	0.0731414	NC	-1.17739	0.00709911	DOWN	LOC104433527	polygalacturonase At1g48100
GO:0071555~cell wall organization	264	Eucgr.B03312	2.70062	2.13308	2.73151	3.33481	3.18874	3.47262	4.09019	2.33464	3.64186	1.47998	1.97704	1.41787	0.787771	0.0731414	NC	-1.17739	0.00709911	DOWN	LOC104433527	polygalacturonase At1g48100
GO:0071555~cell wall organization	264	Eucgr.F03635	185.837	150.411	182.308	38.8126	28.756	22.2109	154.241	141.191	145.296	38.9658	40.4607	39.2757	-2.21449	7.18e-08	DOWN	-1.66457	5.34e-05	DOWN	LOC104450372	probable cellulose synthase A catalytic subunit 5 [UDP-forming]
GO:0071555~cell wall organization	264	Eucgr.F03635	185.837	150.411	182.308	38.8126	28.756	22.2109	154.241	141.191	145.296	38.9658	40.4607	39.2757	-2.21449	7.18e-08	DOWN	-1.66457	5.34e-05	DOWN	LOC104450372	probable cellulose synthase A catalytic subunit 5 [UDP-forming]
GO:0071555~cell wall organization	264	Eucgr.B01532	7.70463	6.10217	8.42304	2.02839	1.47794	1.07929	6.67729	6.82655	6.65053	1.64749	1.69364	1.93057	-1.89266	1.14e-05	DOWN	-1.6626	0.000114704	DOWN	LOC104427784	probable cellulose synthase A catalytic subunit 6 [UDP-forming]
GO:0071555~cell wall organization	264	Eucgr.B00636	36.8007	37.2905	42.7861	11.2828	10.1815	10.1535	42.2666	40.8615	41.4557	12.2627	12.5727	12.8295	-1.55313	0.000167902	DOWN	-1.4871	0.000340696	DOWN	LOC104420988	probable galacturonosyltransferase 11
GO:0071555~cell wall organization	264	Eucgr.B02504	10.2943	13.0527	14.0704	100.305	94.6543	30.3403	17.1293	15.1457	12.1905	82.004	83.2053	80.6007	2.99369	1.04e-12	UP	2.75496	4.75e-11	UP	LOC104432880	homeobox-leucine zipper protein REVOLUTA
GO:0071555~cell wall organization	264	Eucgr.K00562	13.173	17.6681	16.2679	6.22872	4.46792	2.90869	16.5817	19.1924	17.4844	4.67888	5.82569	6.77043	-1.62329	9.65e-05	DOWN	-1.43845	0.000580106	DOWN	LOC104424616	probable polygalacturonase
GO:0071555~cell wall organization	264	Eucgr.K00562	13.173	17.6681	16.2679	6.22872	4.46792	2.90869	16.5817	19.1924	17.4844	4.67888	5.82569	6.77043	-1.62329	9.65e-05	DOWN	-1.43845	0.000580106	DOWN	LOC104424616	probable polygalacturonase
GO:0071555~cell wall organization	264	Eucgr.A01315	52.1885	75.2318	69.5735	5.04004	4.58861	3.21796	32.002	29.2312	31.9485	4.2028	4.2546	5.50329	-3.67279	3.84e-17	DOWN	-2.59815	8.12e-10	DOWN	LOC104436866	probable polygalacturonase
GO:0071555~cell wall organization	264	Eucgr.E00105	103.623	138.852	113.65	15.7227	9.60152	2.7793	32.6849	34.9574	20.4805	8.85424	7.66783	9.32593	-3.38422	2.96e-15	DOWN	-1.57237	0.0001708	DOWN	LOC104443416	probable polygalacturonase
GO:0071555~cell wall organization	264	Eucgr.C00178	221.655	304.855	220.775	100.063	116.039	130.696	161.661	157.754	174.373	218.875	235.586	214.402	-0.210074	0.654817	NC	1.15427	0.00567213	UP	LOC104435971	probable xyloglucan endotransglucosylase/hydrolase protein 23
GO:0071555~cell wall organization	264	Eucgr.D01344	0.061934	0.059259	0.494182	1.00425	1.35343	0.335099	0.061613	0.683523	0.059328	2.79157	2.33397	2.28167	2.55453	1.82e-05	UP	3.907	1.99e-13	UP	LOC104441418	L-ascorbate oxidase homolog
GO:0071555~cell wall organization	264	Eucgr.B01596	5174.78	3194.01	4346.58	264.161	254.561	492.794	3567.43	3570.47	3564.66	407.022	388.336	401.616	-3.25902	1.38e-14	DOWN	-2.92683	3.28e-12	DOWN	LOC104428524	probable xyloglucan endotransglucosylase/hydrolase protein 23
GO:0071555~cell wall organization	264	Eucgr.C00786	92.7745	82.6863	99.0526	51.267	42.6295	49.4849	72.8453	82.5253	72.3873	29.7019	29.9347	30.7207	-0.565034	0.19212	NC	-1.10768	0.0081239	DOWN	LOC104436396	probable polygalacturonase
GO:0071555~cell wall organization	264	Eucgr.C02203	1.40524	1.2259	1.47024	0	0.188054	0	2.80651	2.8578	8.02682	1.28492	0.959875	0.608052	0	1	NC	-2.31614	3.17e-06	DOWN	LOC104437322	probable xyloglucan endotransglucosylase/hydrolase protein 23
GO:0071555~cell wall organization	264	Eucgr.A01661	6.96916	11.5421	8.91215	1.8729	1.2216	1.02073	7.9224	14.2251	7.58621	2.99367	2.46312	2.62518	-2.56523	8.63e-09	DOWN	-1.6905	8.45e-05	DOWN	LOC104439389	probable xyloglucan endotransglucosylase/hydrolase protein 32
GO:0071555~cell wall organization	264	Eucgr.I00659	71.0425	83.5782	93.0166	0	0	0	28.7559	37.0731	32.3649	0	0.22352	0.193521	-11.1902	2.58e-52	DOWN	-8.58526	4.21e-41	DOWN	LOC104418410	probable xyloglucan endotransglucosylase/hydrolase protein 6
GO:0071555~cell wall organization	264	Eucgr.C01147	11.1138	12.7651	10.6459	5.8395	5.00107	5.01543	7.24132	4.35977	5.72021	2.33275	2.36982	2.28341	-0.960248	0.0316992	NC	-1.37709	0.00279775	DOWN	LOC104439106	probable cellulose synthase A catalytic subunit 1 [UDP-forming]
GO:0071555~cell wall organization	264	Eucgr.D00963	36.0782	34.2159	43.0783	46.4126	45.5072	26.7832	22.3317	21.706	18.7837	52.1121	52.4267	52.106	0.47866	0.27679	NC	1.5422	0.000190759	UP	LOC104441185	probable galacturonosyltransferase 4
GO:0071555~cell wall organization	264	Eucgr.D00963	36.0782	34.2159	43.0783	46.4126	45.5072	26.7832	22.3317	21.706	18.7837	52.1121	52.4267	52.106	0.47866	0.27679	NC	1.5422	0.000190759	UP	LOC104441185	probable galacturonosyltransferase 4
GO:0071555~cell wall organization	264	Eucgr.D00963	36.0782	34.2159	43.0783	46.4126	45.5072	26.7832	22.3317	21.706	18.7837	52.1121	52.4267	52.106	0.47866	0.27679	NC	1.5422	0.000190759	UP	LOC104441185	probable galacturonosyltransferase 4
GO:0071555~cell wall organization	264	Eucgr.D00963	36.0782	34.2159	43.0783	46.4126	45.5072	26.7832	22.3317	21.706	18.7837	52.1121	52.4267	52.106	0.47866	0.27679	NC	1.5422	0.000190759	UP	LOC104441185	probable galacturonosyltransferase 4
GO:0071555~cell wall organization	264	Eucgr.K02992	104.46	97.5661	108.026	42.8785	40.3598	19.1743	34.4388	37.6909	23.798	26.8459	24.772	26.0271	-1.29469	0.00167238	DOWN	-0.0828652	0.86982	NC	LOC104426386	auxin transporter-like protein 4
GO:0071555~cell wall organization	264	Eucgr.K02992	104.46	97.5661	108.026	42.8785	40.3598	19.1743	34.4388	37.6909	23.798	26.8459	24.772	26.0271	-1.29469	0.00167238	DOWN	-0.0828652	0.86982	NC	LOC104426386	auxin transporter-like protein 4
GO:0071555~cell wall organization	264	Eucgr.C02801	695.787	550.638	669.439	188.298	183.311	160.592	440.288	468.596	453.597	195.625	200.523	197.392	-1.4633	0.000352307	DOWN	-0.965885	0.0216211	NC	LOC104437683	cellulose synthase A catalytic subunit 1 [UDP-forming]
GO:0071555~cell wall organization	264	Eucgr.C02801	695.787	550.638	669.439	188.298	183.311	160.592	440.288	468.596	453.597	195.625	200.523	197.392	-1.4633	0.000352307	DOWN	-0.965885	0.0216211	NC	LOC104437683	cellulose synthase A catalytic subunit 1 [UDP-forming]
GO:0071555~cell wall organization	264	Eucgr.J01278	15.7719	13.2152	16.8315	4.64806	3.68234	1.81427	7.45823	8.50672	6.00648	3.72553	3.09851	4.14957	-1.82348	1.09e-05	DOWN	-0.735203	0.0916116	NC	LOC104421950	cellulose synthase A catalytic subunit 3 [UDP-forming]
GO:0071555~cell wall organization	264	Eucgr.G03380	408.497	367.406	429.531	106.573	93.6704	73.9013	224.701	249.218	237.496	125.302	134.926	133.284	-1.75279	1.81e-05	DOWN	-0.616949	0.154603	NC	LOC104454655	cellulose synthase A catalytic subunit 3 [UDP-forming]-like
GO:0071555~cell wall organization	264	Eucgr.G03380	408.497	367.406	429.531	106.573	93.6704	73.9013	224.701	249.218	237.496	125.302	134.926	133.284	-1.75279	1.81e-05	DOWN	-0.616949	0.154603	NC	LOC104454655	cellulose synthase A catalytic subunit 3 [UDP-forming]-like
GO:0071555~cell wall organization	264	Eucgr.D00642	140.465	146.149	153.825	100.397	84.7929	91.3421	95.1574	109.377	119.495	43.9397	44.6246	42.8109	-0.275807	0.547417	NC	-1.13541	0.00648639	DOWN	LOC104442640	mediator of RNA polymerase II transcription subunit 16
GO:0071555~cell wall organization	264	Eucgr.D00642	140.465	146.149	153.825	100.397	84.7929	91.3421	95.1574	109.377	119.495	43.9397	44.6246	42.8109	-0.275807	0.547417	NC	-1.13541	0.00648639	DOWN	LOC104442640	mediator of RNA polymerase II transcription subunit 16
GO:0071555~cell wall organization	264	Eucgr.G01931	35.4824	30.2517	38.4772	68.8694	64.8148	57.2933	33.5415	30.2277	28.9111	38.6637	37.1861	38.2585	1.29223	0.00169698	UP	0.547138	0.212854	NC	LOC104453524	alpha-mannosidase At3g26720-like
GO:0071555~cell wall organization	264	Eucgr.D01730	0.371812	0.316188	0.15486	3.52304	2.57805	1.35731	0.064486	0.469199	0.263018	2.53865	2.37756	3.43758	3.42494	1.01e-10	UP	4.46887	1.09e-15	UP	LOC104441654	probable polygalacturonase
GO:0071555~cell wall organization	264	Eucgr.E00104	5.9794	4.52966	5.54526	52.9175	39.3798	10.9392	7.25537	10.3349	6.90233	62.3639	60.6166	65.651	3.09442	4.71e-13	UP	3.27662	2.18e-14	UP	LOC104443415	probable polygalacturonase
GO:0071555~cell wall organization	264	Eucgr.C00642	7.09516	11.0057	10.84	25.2243	38.8309	54.3803	113.144	78.8181	102.438	34.3409	30.7015	31.6676	2.59232	5.79e-10	UP	-1.3618	0.0010221	DOWN	LOC104436294	calcineurin B-like protein 9
GO:0071555~cell wall organization	264	Eucgr.C00642	7.09516	11.0057	10.84	25.2243	38.8309	54.3803	113.144	78.8181	102.438	34.3409	30.7015	31.6676	2.59232	5.79e-10	UP	-1.3618	0.0010221	DOWN	LOC104436294	calcineurin B-like protein 9
GO:0071555~cell wall organization	264	Eucgr.A01324	2.18475	4.33164	4.46046	16.2506	13.4288	6.61061	8.8003	34.2067	11.9129	6.33067	6.75869	7.31965	2.20704	1.22e-07	UP	-1.19573	0.00434168	DOWN	LOC104436967	cellulose synthase A catalytic subunit 4 [UDP-forming]
GO:0071555~cell wall organization	264	Eucgr.C00176	333.927	399.746	327.547	1160.89	1108.13	877.224	447.155	418.222	383.788	1130.86	1203.31	1143	1.93955	2.14e-06	UP	1.74131	2.35e-05	UP	LOC104435966	probable xyloglucan endotransglucosylase/hydrolase protein 23
GO:0071555~cell wall organization	264	Eucgr.C00182	16.0813	22.5012	17.1744	25.9565	32.6504	29.4648	41.0673	35.8028	46.0237	92.7342	89.9825	94.9808	1.44069	0.000510503	UP	1.42995	0.00055875	UP	LOC104435973	probable xyloglucan endotransglucosylase/hydrolase protein 23
GO:0071555~cell wall organization	264	Eucgr.C00184	24.9324	27.8444	25.3825	92.5989	124.77	98.6896	62.6658	45.1118	57.0428	415.799	412.753	416.546	2.46999	2.59e-09	UP	3.21373	3.75e-14	UP	LOC104435976	probable xyloglucan endotransglucosylase/hydrolase protein 23
GO:0071555~cell wall organization	264	Eucgr.D01765	10.797	8.64498	7.51793	0.365443	0.805129	0.318162	5.6229	8.10001	6.9771	3.01582	3.15	4.19138	-4.22106	3.97e-18	DOWN	-0.776362	0.0793584	NC	LOC104441676	cellulose synthase-like protein G3
GO:0071555~cell wall organization	264	Eucgr.G02075	6.9734	3.97647	4.82242	9.95196	9.55631	4.75002	3.04077	3.12772	2.16023	11.3967	10.3758	10.2396	1.09057	0.0116094	UP	2.38729	3.34e-08	UP	LOC104453636	probable xyloglucan endotransglucosylase/hydrolase protein 28
GO:0071555~cell wall organization	264	Eucgr.D02229	71.9981	69.3335	69.5883	295.166	322.131	313.776	113.611	113.758	103.065	212.396	212.579	215.92	2.63524	2.22e-10	UP	1.27034	0.0022124	UP	LOC104442050	probable xyloglucan endotransglucosylase/hydrolase protein 30
GO:0071555~cell wall organization	264	Eucgr.D00476	0.05763	0	0.415989	14.018	11.6169	1.95213	1.57195	20.9939	4.10256	3.82364	4.58231	3.89361	6.16301	1.88e-31	UP	-0.928793	0.0301844	NC	LOC104440888	cellulose synthase A catalytic subunit 8 [UDP-forming]
GO:0071555~cell wall organization	264	Eucgr.K00779	0.275929	0	0	1.95892	1.15474	0.296668	0.049606	0	0	0	0.066442	0	3.3231	3.53e-09	UP	0	1	NC	LOC104424743	cellulose synthase-like protein B4
GO:0071555~cell wall organization	264	Eucgr.F03066	27.3961	39.2088	31.3899	96.8945	76.8065	49.624	69.2273	70.5875	58.4441	46.4083	44.5996	45.6136	1.58465	0.000108529	UP	-0.282446	0.541254	NC	LOC104449909	homeobox-leucine zipper protein ATHB-15
GO:0071555~cell wall organization	264	Eucgr.D01765	10.797	8.64498	7.51793	0.365443	0.805129	0.318162	5.6229	8.10001	6.9771	3.01582	3.15	4.19138	-4.22106	3.97e-18	DOWN	-0.776362	0.0793584	NC	LOC104441676	cellulose synthase-like protein G3
GO:0071555~cell wall organization	264	Eucgr.B03552	0.598559	0.241632	0.631896	1.9528	1.60398	0.784755	2.07113	0.965271	0.925279	1.18057	1.00423	1.09216	2.20081	6.3e-06	UP	-0.112511	0.855333	NC	LOC104433725	inactive leucine-rich repeat receptor-like protein kinase CORYNE
GO:0071555~cell wall organization	264	Eucgr.C01286	1.00396	1.37385	1.50649	3.11999	4.09759	2.23762	1.09126	0.64796	0.812778	0.375513	0.245378	0.095261	1.52037	0.000942207	UP	0	1	NC	LOC104436759	potassium channel AKT1
GO:0071555~cell wall organization	264	Eucgr.C04163	0.229611	0.842689	0.789956	2.24737	1.86575	1.34576	7.34412	5.53967	5.36411	4.50715	4.35453	4.69255	1.98398	1.41e-05	UP	-0.1107	0.826092	NC	LOC104438496	potassium channel AKT1
GO:0071555~cell wall organization	264	Eucgr.K01816	15.2518	14.2016	13.4506	3.7397	4.18522	3.66314	8.86109	9.34095	7.84164	6.00304	6.54919	7.27444	-1.72598	4.8e-05	DOWN	0.142624	0.778533	NC	LOC104425475	exopolygalacturonase
GO:0071555~cell wall organization	264	Eucgr.K01816	15.2518	14.2016	13.4506	3.7397	4.18522	3.66314	8.86109	9.34095	7.84164	6.00304	6.54919	7.27444	-1.72598	4.8e-05	DOWN	0.142624	0.778533	NC	LOC104425475	exopolygalacturonase
GO:0071555~cell wall organization	264	Eucgr.K01816	15.2518	14.2016	13.4506	3.7397	4.18522	3.66314	8.86109	9.34095	7.84164	6.00304	6.54919	7.27444	-1.72598	4.8e-05	DOWN	0.142624	0.778533	NC	LOC104425475	exopolygalacturonase
GO:0071555~cell wall organization	264	Eucgr.K01816	15.2518	14.2016	13.4506	3.7397	4.18522	3.66314	8.86109	9.34095	7.84164	6.00304	6.54919	7.27444	-1.72598	4.8e-05	DOWN	0.142624	0.778533	NC	LOC104425475	exopolygalacturonase
GO:0071555~cell wall organization	264	Eucgr.A02372	0.047423	0.201707	0.076357	1.63073	0.946255	0.700792	0.308392	0.35694	0.328719	0.289153	0.483649	0.308383	3.57986	3.04e-10	UP	0	1	NC	LOC104445133	probable cellulose synthase A catalytic subunit 8 [UDP-forming]
GO:0071555~cell wall organization	264	Eucgr.F03125	20.6668	23.1922	20.3349	9.66827	13.4845	13.162	33.2709	25.0104	26.8152	9.86564	12.3696	12.3119	-0.331827	0.470465	NC	-1.10914	0.00855844	DOWN	LOC104449960	calcineurin B-like protein 9
GO:0071555~cell wall organization	264	Eucgr.F01611	42.8614	49.9596	52.5334	259.91	234.35	46.9848	60.6411	74.2691	65.2825	170.172	138.043	134.123	2.32545	1.69e-08	UP	1.44891	0.000458515	UP	LOC104448797	protein WALLS ARE THIN 1
GO:0071555~cell wall organization	264	Eucgr.F01611	42.8614	49.9596	52.5334	259.91	234.35	46.9848	60.6411	74.2691	65.2825	170.172	138.043	134.123	2.32545	1.69e-08	UP	1.44891	0.000458515	UP	LOC104448797	protein WALLS ARE THIN 1
GO:0071555~cell wall organization	264	Eucgr.F01611	42.8614	49.9596	52.5334	259.91	234.35	46.9848	60.6411	74.2691	65.2825	170.172	138.043	134.123	2.32545	1.69e-08	UP	1.44891	0.000458515	UP	LOC104448797	protein WALLS ARE THIN 1
GO:0071555~cell wall organization	264	Eucgr.D01935	59.8953	86.034	71.3967	17.3586	18.3883	11.2318	21.2637	22.1436	21.3121	12.3019	14.6481	13.1173	-1.8785	5.1e-06	DOWN	-0.44365	0.325898	NC	LOC104441811	homeobox protein HD1
GO:0071555~cell wall organization	264	Eucgr.D01935	59.8953	86.034	71.3967	17.3586	18.3883	11.2318	21.2637	22.1436	21.3121	12.3019	14.6481	13.1173	-1.8785	5.1e-06	DOWN	-0.44365	0.325898	NC	LOC104441811	homeobox protein HD1
GO:0071555~cell wall organization	264	Eucgr.E04252	41.4119	42.5815	42.1453	10.6923	8.77069	7.26783	14.1614	14.668	14.5461	7.43687	6.86983	7.61653	-1.92723	3.23e-06	DOWN	-0.740846	0.0900465	NC	LOC104445795	probable arabinosyltransferase ARAD1
GO:0071555~cell wall organization	264	Eucgr.C03148	39.9709	46.9382	24.8987	8.3315	10.731	3.87751	50.4519	47.6108	81.6752	7.69926	8.59121	8.20238	-1.9671	2.42e-06	DOWN	-2.70753	1.47e-10	DOWN	LOC104437922	thermospermine synthase ACAULIS5
GO:0071555~cell wall organization	264	Eucgr.F01847	0	0	0	22.4473	12.3678	1.7543	1.12247	2.93633	2.61021	16.0544	16.8358	15.0459	11.2492	3.39e-38	UP	3.25371	1.49e-13	UP	LOC104448977	protein WALLS ARE THIN 1
GO:0071555~cell wall organization	264	Eucgr.F01847	0	0	0	22.4473	12.3678	1.7543	1.12247	2.93633	2.61021	16.0544	16.8358	15.0459	11.2492	3.39e-38	UP	3.25371	1.49e-13	UP	LOC104448977	protein WALLS ARE THIN 1
GO:0071555~cell wall organization	264	Eucgr.C03148	39.9709	46.9382	24.8987	8.3315	10.731	3.87751	50.4519	47.6108	81.6752	7.69926	8.59121	8.20238	-1.9671	2.42e-06	DOWN	-2.70753	1.47e-10	DOWN	LOC104437922	thermospermine synthase ACAULIS5
GO:0071555~cell wall organization	264	Eucgr.C03148	39.9709	46.9382	24.8987	8.3315	10.731	3.87751	50.4519	47.6108	81.6752	7.69926	8.59121	8.20238	-1.9671	2.42e-06	DOWN	-2.70753	1.47e-10	DOWN	LOC104437922	thermospermine synthase ACAULIS5
GO:0071555~cell wall organization	264	Eucgr.C03148	39.9709	46.9382	24.8987	8.3315	10.731	3.87751	50.4519	47.6108	81.6752	7.69926	8.59121	8.20238	-1.9671	2.42e-06	DOWN	-2.70753	1.47e-10	DOWN	LOC104437922	thermospermine synthase ACAULIS5
GO:0071555~cell wall organization	264	Eucgr.C03148	39.9709	46.9382	24.8987	8.3315	10.731	3.87751	50.4519	47.6108	81.6752	7.69926	8.59121	8.20238	-1.9671	2.42e-06	DOWN	-2.70753	1.47e-10	DOWN	LOC104437922	thermospermine synthase ACAULIS5
GO:0071555~cell wall organization	264	Eucgr.F00995	0	0	0.702548	2.81388	2.62861	0.228906	0.656572	5.14346	1.4479	1.55396	0.986958	1.81307	5.31258	7.47e-09	UP	-0.257301	0.719433	NC	LOC104448351	probable galacturonosyltransferase 12
GO:0071555~cell wall organization	264	Eucgr.F00995	0	0	0.702548	2.81388	2.62861	0.228906	0.656572	5.14346	1.4479	1.55396	0.986958	1.81307	5.31258	7.47e-09	UP	-0.257301	0.719433	NC	LOC104448351	probable galacturonosyltransferase 12
GO:0071555~cell wall organization	264	Eucgr.I01475	3.99396	6.53204	4.07476	17.7248	12.7664	4.48017	6.07778	6.45916	5.07216	13.4417	12.957	13.806	1.63943	8.72e-05	UP	1.49937	0.000353357	UP	LOC104418995	rop guanine nucleotide exchange factor 1
GO:0071555~cell wall organization	264	Eucgr.I01475	3.99396	6.53204	4.07476	17.7248	12.7664	4.48017	6.07778	6.45916	5.07216	13.4417	12.957	13.806	1.63943	8.72e-05	UP	1.49937	0.000353357	UP	LOC104418995	rop guanine nucleotide exchange factor 1
GO:0071555~cell wall organization	264	Eucgr.I01475	3.99396	6.53204	4.07476	17.7248	12.7664	4.48017	6.07778	6.45916	5.07216	13.4417	12.957	13.806	1.63943	8.72e-05	UP	1.49937	0.000353357	UP	LOC104418995	rop guanine nucleotide exchange factor 1
GO:0071555~cell wall organization	264	Eucgr.A01962	2.8547	3.64445	2.69362	63.379	68.4039	103.96	63.1026	34.915	45.7507	48.1378	39.7941	39.1058	5.36527	1.8e-30	UP	0.174221	0.717315	NC	LOC104441697	probable galacturonosyltransferase 15
GO:0071555~cell wall organization	264	Eucgr.A01962	2.8547	3.64445	2.69362	63.379	68.4039	103.96	63.1026	34.915	45.7507	48.1378	39.7941	39.1058	5.36527	1.8e-30	UP	0.174221	0.717315	NC	LOC104441697	probable galacturonosyltransferase 15
GO:0071555~cell wall organization	264	Eucgr.G01174	0.28841	0.735411	0.697487	5.34669	3.43206	1.91291	0.677263	1.45414	1.00872	1.64601	1.1544	1.9359	3.36932	1.95e-10	UP	0.931489	0.0851827	NC	LOC104453046	probable xyloglucan endotransglucosylase/hydrolase protein 10
GO:0071555~cell wall organization	264	Eucgr.D00052	21.6559	22.5082	26.3096	41.3334	42.9687	30.3196	29.8887	26.4006	25.5872	33.2838	35.0455	34.3319	1.13178	0.00626085	UP	0.59289	0.173698	NC	LOC104440634	protein NAP1
GO:0071555~cell wall organization	264	Eucgr.D00052	21.6559	22.5082	26.3096	41.3334	42.9687	30.3196	29.8887	26.4006	25.5872	33.2838	35.0455	34.3319	1.13178	0.00626085	UP	0.59289	0.173698	NC	LOC104440634	protein NAP1
GO:0071555~cell wall organization	264	Eucgr.D00052	21.6559	22.5082	26.3096	41.3334	42.9687	30.3196	29.8887	26.4006	25.5872	33.2838	35.0455	34.3319	1.13178	0.00626085	UP	0.59289	0.173698	NC	LOC104440634	protein NAP1
GO:0071555~cell wall organization	264	Eucgr.A01966	50.6942	58.924	47.5871	386.734	323.115	414.034	61.5645	68.1807	86.5197	453.315	453.043	462.53	3.29176	8.63e-15	UP	2.95294	2.31e-12	UP	LOC104441732	xyloglucan endotransglucosylase/hydrolase 2
GO:0071555~cell wall organization	264	Eucgr.A00881	41.0849	46.1009	46.8293	17.2572	16.0468	11.6759	26.4468	25.4997	28.5142	11.6954	12.0626	9.76563	-1.19729	0.00384844	DOWN	-0.998239	0.0181685	NC	LOC104433438	probable galacturonosyltransferase 7
GO:0071555~cell wall organization	264	Eucgr.A00881	41.0849	46.1009	46.8293	17.2572	16.0468	11.6759	26.4468	25.4997	28.5142	11.6954	12.0626	9.76563	-1.19729	0.00384844	DOWN	-0.998239	0.0181685	NC	LOC104433438	probable galacturonosyltransferase 7
GO:0071555~cell wall organization	264	Eucgr.I02091	63.5975	61.1072	66.0205	15.3432	12.4187	12.1893	40.0449	43.0118	39.8008	19.1471	21.0027	20.2056	-1.92237	2.98e-06	DOWN	-0.792166	0.064567	NC	LOC104419469	probable galacturonosyltransferase 9
GO:0071555~cell wall organization	264	Eucgr.E00853	150.297	111.105	142.558	29.2896	23.9557	13.8227	65.0905	78.6971	65.8254	53.881	53.5573	55.1475	-2.28523	3.09e-08	DOWN	-0.160739	0.739006	NC	LOC104443984	probable polygalacturonase
GO:0071555~cell wall organization	264	Eucgr.J03054	23.1189	31.5607	28.3894	10.1256	7.87606	8.41287	21.2717	19.5671	23.3601	9.29228	9.91443	8.79943	-1.25456	0.00257936	DOWN	-0.828368	0.0538533	NC	LOC104423169	probable polygalacturonase At1g80170
GO:0071555~cell wall organization	264	Eucgr.A01968	686.544	749.591	621.261	225.715	242.881	237.803	822.521	857.162	832.018	433.593	436.371	437.043	-1.16887	0.00461635	DOWN	-0.714512	0.0958144	NC	LOC104441748	probable xyloglucan endotransglucosylase/hydrolase protein 16
GO:0071555~cell wall organization	264	Eucgr.C00180	420.935	602.071	465.32	71.3431	108.639	114.801	469.253	584.557	579.91	536.711	513.447	538.688	-1.91909	2.84e-06	DOWN	0.24623	0.597432	NC	LOC104435967	probable xyloglucan endotransglucosylase/hydrolase protein 23
GO:0071555~cell wall organization	264	Eucgr.C00180	420.935	602.071	465.32	71.3431	108.639	114.801	469.253	584.557	579.91	536.711	513.447	538.688	-1.91909	2.84e-06	DOWN	0.24623	0.597432	NC	LOC104435967	probable xyloglucan endotransglucosylase/hydrolase protein 23
GO:0071555~cell wall organization	264	Eucgr.C00181	176.367	230.632	177.316	32.5309	41.4455	51.1221	217.278	234.61	224.877	158.735	162.932	162.021	-1.52731	0.000306903	DOWN	-0.731648	0.0912097	NC	LOC104435972	probable xyloglucan endotransglucosylase/hydrolase protein 23
GO:0071555~cell wall organization	264	Eucgr.D01294	41.5511	59.7814	46.6147	11.0651	13.1669	8.51502	35.5954	30.7884	39.3349	39.0959	43.7187	41.7856	-1.8402	9.34e-06	DOWN	0.50016	0.260317	NC	LOC104441382	probable xyloglucan endotransglucosylase/hydrolase protein 8
GO:0071555~cell wall organization	264	Eucgr.J01663	14.1524	26.6154	28.4392	4.7361	9.13276	4.48278	66.1685	86.1488	67.5013	44.4846	46.9985	49.027	-1.63139	0.000104818	DOWN	-0.40709	0.365259	NC	LOC104422221	probable xyloglucan endotransglucosylase/hydrolase protein B
GO:0071555~cell wall organization	264	Eucgr.K00883	60.7116	95.491	48.9897	416.46	282.474	132.32	160.752	163.15	171.275	532.347	582.364	556.351	2.37816	8.22e-09	UP	1.97108	1.73e-06	UP	LOC104424824	xyloglucan endotransglucosylase/hydrolase protein 9
GO:0071555~cell wall organization	264	Eucgr.K00883	60.7116	95.491	48.9897	416.46	282.474	132.32	160.752	163.15	171.275	532.347	582.364	556.351	2.37816	8.22e-09	UP	1.97108	1.73e-06	UP	LOC104424824	xyloglucan endotransglucosylase/hydrolase protein 9
GO:0071555~cell wall organization	264	Eucgr.J00383	10.998	15.2429	15.6397	7.3205	4.47771	4.92321	3.21554	2.83765	2.4513	8.38839	8.271	7.80459	-1.04139	0.016424	DOWN	1.81128	3.46e-05	UP	LOC104421223	xyloglucan endotransglucosylase/hydrolase protein 31
GO:0071555~cell wall organization	264	Eucgr.B03937	0.86649	2.04982	1.47938	0.284751	0.114096	0	0.52408	0.862923	0.479621	0	0	0.120514	-3.02439	4.22e-06	DOWN	0	1	NC	LOC104434058	xyloglucan endotransglucosylase/hydrolase protein 31
GO:0071555~cell wall organization	264	Eucgr.H00619	1.226	1.26535	2.15197	0.281708	0	0.117737	0	1.02974	0.941673	1.00712	1.00772	0.695876	-2.30609	0.000259868	DOWN	0	1	NC	LOC104456417	xyloglucan endotransglucosylase/hydrolase protein 9
GO:0071555~cell wall organization	264	Eucgr.H00619	1.226	1.26535	2.15197	0.281708	0	0.117737	0	1.02974	0.941673	1.00712	1.00772	0.695876	-2.30609	0.000259868	DOWN	0	1	NC	LOC104456417	xyloglucan endotransglucosylase/hydrolase protein 9
GO:0071555~cell wall organization	264	Eucgr.I02503	30.6318	29.7327	33.8612	52.5356	56.7927	49.2151	42.0741	33.4867	32.6139	31.4636	32.321	32.3745	1.14789	0.00545656	UP	0.089318	0.857872	NC	LOC104419800	serine/threonine-protein kinase TOR
GO:0071555~cell wall organization	264	Eucgr.C04378	1.40552	1.50924	1.93261	2.78213	3.53023	2.95874	3.83597	2.02721	2.14672	2.08416	2.22599	1.65598	1.41759	0.000905408	UP	-0.154538	0.758323	NC	LOC104438610	serine/threonine-protein kinase TOR
GO:0071555~cell wall organization	264	Eucgr.C01105	2.06138	2.48576	2.57333	6.27836	7.79435	4.93588	3.87741	2.62633	3.00728	1.4607	1.58759	1.22256	1.88025	1.09e-05	UP	-1.08315	0.0166267	DOWN
GO:0071555~cell wall organization	264	Eucgr.L01389	2.11839	1.15937	1.08185	1.42562	2.59736	0.907298	3.77316	3.28023	3.49455	1.67453	1.8539	1.31258	1.12849	0.0392742	UP	-0.864411	0.0748659	NC
GO:0071555~cell wall organization	264	Eucgr.C00177	346.973	439.934	365.489	631.098	639.716	529.337	549.939	537.651	515.894	865.853	815.162	919.316	1.46943	0.00033181	UP	1.39826	0.000716132	UP
GO:0071555~cell wall organization	264	Eucgr.L01392	0.790657	0.539636	0.248034	0.920619	1.50861	0.546085	1.01471	1.05998	0.54148	0.27924	0.615227	0.278857	1.28608	0.0291509	UP	0	1	NC
GO:0071555~cell wall organization	264	Eucgr.C03043	20.4645	42.0154	27.699	3.65121	4.71177	6.01079	36.0243	29.852	38.9292	5.72952	5.43258	5.39089	-2.60015	8.94e-10	DOWN	-2.50335	2.83e-09	DOWN
GO:0071555~cell wall organization	264	Eucgr.C03043	20.4645	42.0154	27.699	3.65121	4.71177	6.01079	36.0243	29.852	38.9292	5.72952	5.43258	5.39089	-2.60015	8.94e-10	DOWN	-2.50335	2.83e-09	DOWN
GO:0071555~cell wall organization	264	Eucgr.C03043	20.4645	42.0154	27.699	3.65121	4.71177	6.01079	36.0243	29.852	38.9292	5.72952	5.43258	5.39089	-2.60015	8.94e-10	DOWN	-2.50335	2.83e-09	DOWN
GO:0071555~cell wall organization	264	Eucgr.C03043	20.4645	42.0154	27.699	3.65121	4.71177	6.01079	36.0243	29.852	38.9292	5.72952	5.43258	5.39089	-2.60015	8.94e-10	DOWN	-2.50335	2.83e-09	DOWN
GO:0071555~cell wall organization	264	Eucgr.C03043	20.4645	42.0154	27.699	3.65121	4.71177	6.01079	36.0243	29.852	38.9292	5.72952	5.43258	5.39089	-2.60015	8.94e-10	DOWN	-2.50335	2.83e-09	DOWN
GO:0071555~cell wall organization	264	Eucgr.E03847	8.80666	10.3289	8.35826	10.553	8.29618	7.91473	3.13136	5.05653	6.00127	10.4051	6.53562	6.72143	-0.200027	0.676403	NC	1.43091	0.000727588	UP
GO:0071555~cell wall organization	264	Eucgr.H00939	1.08732	1.46109	1.16406	0.625042	0.487895	0.458978	2.32452	0.625163	1.90461	0.504303	0.311339	0.173252	-0.664397	0.237445	NC	-2.00544	5.32e-05	DOWN
GO:0071555~cell wall organization	264	Eucgr.G00074	33.238	27.9387	34.5689	61.78	59.9051	45.7265	27.6843	24.9683	25.841	44.238	47.1777	45.6846	1.22072	0.00307167	UP	1.06353	0.0111703	UP
GO:0071555~cell wall organization	264	Eucgr.H00185	18.969	24.0962	22.8532	1.78421	0.78304	1.11858	8.12895	10.3556	10.583	1.19471	0.981955	1.53734	-4.17466	6.72e-19	DOWN	-2.88949	1.64e-10	DOWN
GO:0071555~cell wall organization	264	Eucgr.J01639	0.194759	0.364851	0.265493	0.063815	0.022163	0.088937	7.72668	4.61634	4.23128	0.206547	0.710846	0.372715	0	1	NC	-3.78726	2.63e-15	DOWN
GO:0071555~cell wall organization	264	Eucgr.J02219	1.59679	3.2516	1.84957	1.55289	0.635911	1.18403	2.42928	2.61895	2.75921	0.262203	0.326654	0.721917	-0.613521	0.246348	NC	-2.82205	1.44e-07	DOWN
GO:0071555~cell wall organization	264	Eucgr.K00781	0.95698	0.989521	0.881876	0.420351	0.306116	0	0.686913	2.10909	1.3719	0	0	0	-1.80433	0.00148916	NC	-6.23272	3.08e-14	DOWN
GO:0071669~plant-type cell wall organization or biogenesis	8	Eucgr.C01100	1.05231	1.12566	1.19459	16.4504	9.42102	6.53053	1.38312	3.09299	1.94402	13.7332	11.8558	12.4052	3.98134	2.35e-18	UP	2.93848	1.01e-11	UP	LOC104436634	probable inactive receptor kinase At2g26730
GO:0071669~plant-type cell wall organization or biogenesis	8	Eucgr.B03624	0	0	0.068073	2.19548	2.07351	1.49533	0.219172	0.133525	0	3.73575	2.65632	5.044	5.81835	2.06e-14	UP	6.18794	8.03e-20	UP	LOC104433791	protein YLS3
GO:0071669~plant-type cell wall organization or biogenesis	8	Eucgr.B02183	0.915117	1.34134	1.09312	3.36516	2.22756	2.39324	0.686139	0.824439	0.589165	2.13252	2.55253	1.99055	1.68036	0.00419708	UP	0	1	NC	LOC104432575	50S ribosomal protein L18, chloroplastic
GO:0071669~plant-type cell wall organization or biogenesis	8	Eucgr.B02183	0.915117	1.34134	1.09312	3.36516	2.22756	2.39324	0.686139	0.824439	0.589165	2.13252	2.55253	1.99055	1.68036	0.00419708	UP	0	1	NC	LOC104432575	50S ribosomal protein L18, chloroplastic
GO:0071669~plant-type cell wall organization or biogenesis	8	Eucgr.C04151	2.19833	1.82553	2.50736	8.0904	6.82822	7.20513	16.8092	15.3776	13.374	2.75897	2.84532	3.06018	2.23815	2.21e-07	UP	-2.23184	1.44e-07	DOWN	LOC104438484	probable inactive receptor kinase At2g26730
GO:0071669~plant-type cell wall organization or biogenesis	8	Eucgr.G03140	6.13996	4.64903	4.60795	14.3847	10.1121	5.65911	6.6726	4.90043	4.73569	9.32519	8.81532	7.72135	1.36505	0.00104639	UP	0.972903	0.0223323	NC	LOC104454466	probable LRR receptor-like serine/threonine-protein kinase IRK
GO:2000652~regulation of secondary cell wall biogenesis	5	Eucgr.E03226	9.07226	9.97944	9.75729	5.12521	9.41328	10.557	6.7437	7.56102	6.26281	15.5632	17.9255	17.2073	0.187175	0.70284	NC	1.61192	0.000124675	UP	LOC104445234	NAC domain-containing protein 73
GO:2000652~regulation of secondary cell wall biogenesis	5	Eucgr.E03226	9.07226	9.97944	9.75729	5.12521	9.41328	10.557	6.7437	7.56102	6.26281	15.5632	17.9255	17.2073	0.187175	0.70284	NC	1.61192	0.000124675	UP	LOC104445234	NAC domain-containing protein 73
GO:2000652~regulation of secondary cell wall biogenesis	5	Eucgr.D01935	59.8953	86.034	71.3967	17.3586	18.3883	11.2318	21.2637	22.1436	21.3121	12.3019	14.6481	13.1173	-1.8785	5.1e-06	DOWN	-0.44365	0.325898	NC	LOC104441811	homeobox protein HD1
GO:2000652~regulation of secondary cell wall biogenesis	5	Eucgr.D01935	59.8953	86.034	71.3967	17.3586	18.3883	11.2318	21.2637	22.1436	21.3121	12.3019	14.6481	13.1173	-1.8785	5.1e-06	DOWN	-0.44365	0.325898	NC	LOC104441811	homeobox protein HD1
