# Supplementary material for: Transcriptome analysis identifies genes involved in the somatic embryogenesis of Eucalyptus
Source: BMC Genomics. 2020 Nov 18;21:803. doi: 10.1186/s12864-020-07214-5 (PMC7672952; doi:10.1186/s12864-020-07214-5)
Supplement: Supplementary file 4 — Additional file 4. Primers used for qRT-PCR. [file 12864_2020_7214_MOESM4_ESM.xlsx]

## Sheet: Sheet1
Additional file 4. Primers used for qRT-PCR.
Gene	Forward	Reverse	Length of product	Gene_description
Eucgr.A00971	ACTGCGGAGATGAAGACGAT	CGAGGTTGAGGTGCTTGAAG	139	60S ribosomal protein L9
Eucgr.A01091	CGACCCAGAATTTCCCAGACT	GAAGGTGCCGAGCCAGATT	131	ethylene-responsive transcription factor 3
Eucgr.B03715	GCCACAATTAGGAGGAAGAAGA	TGAGGACTCAAGAGTAGGAGAC	147	protein GAST1
Eucgr.C03048	CCACAAGATGAAGCCGAAGC	AGACACAACAATAGCACAACCA	134	putative GATA transcription factor 22
Eucgr.D01811	GAAGAAGACAAGCGGCAACT	ACCATGTCGTTCAATTCCTCAA	131	WRKY transcription factor 22
Eucgr.F00490	CGTCATCTTCGTCGTGTAGTAA	ATTCTATCCTCAGGCTCGCATA	170	protein DOWNSTREAM OF FLC
Eucgr.F01164	TCTCTCTTCGTTTGTCCGTTTC	CGCCGTTAGGGTTTGGGAT	138	ethylene-responsive transcription factor 4
Eucgr.H03077	GAGCATAAACCACAGCACAAAC	TTCCCTTCTTTGGCTCCTC	199	early nodulin-75
Eucgr.K01605	TCACCAACAGAACGACCCAC	GTGCCCCGAGATTGAGAACT	131	somatic embryogenesis receptor kinase 1
H2B	GAAGAAGCGGGTGAAGAAGA	GGCGAGTTTCTCGAAGATGT	145	Histone H2B
